# Supplementary material for: High-Resolution Transcriptome Maps Reveal Strain-Specific Regulatory Features of Multiple Campylobacter jejuni Isolates
Source: PLoS Genet. 2013 May 16;9(5):e1003495. doi: 10.1371/journal.pgen.1003495 (PMC3656092; doi:10.1371/journal.pgen.1003495)
Supplement: Table S4 — TSS detected in the individual C. jejuni strains. This table lists all TSS detected in the individual C. jejuni strains NCTC11168, RM1221, 81116, and 81–176 in separate Excel sheets. A detailed description of the individual columns of this table is listed as an extended legend in Text S1. (XLSX) [file pgen.1003495.s004.xlsx]

## Sheet: NCTC11168
Table S4. TSS detected in the individual C. jejuni strains - NCTC11168.
This table lists all TSS that were detected in C. jejuni NCTC11168.
Pos	Strand	detected	enriched	stepHeight	stepFactor	enrichmentFactor	classCount	Locus_tag	Product	UTRlength	GeneLength	Primary	Secondary	Internal	Antisense	Automated	Manual	Putative sRNA	Putative asRNA	Comment	Sequence -50 nt upstream + TSS (51nt)
1396	'+'	1	1	89.44	3.47	6.99	1	Cj0002	DNA polymerase III subunit beta	87	1068	1	0	0	0	1	0	0	0		TTCTAGAGTGTGAAAAAAAGAAATTAAGCAAAGTATGATAAAATACAAATT
1896	'-'	1	1	3.33	10	3.32	1	Cj0002	DNA polymerase III subunit beta	NA	1068	0	0	0	1	1	0	0	1		TTTAAGGAGTATTTTGGGTTATTTGTATCAATACTTGGTAATATCTTTTTA
2199	'-'	1	1	2.22	>100	>100	1	Cj0002	DNA polymerase III subunit beta	NA	1068	0	0	0	1	1	0	0	1		TCAGTTGAAAAACTGAGTTCTTGTTTGAAAGTTTTTGGTATAACTTTTTCA
2398	'-'	1	1	6.65	10	>100	1	Cj0002	DNA polymerase III subunit beta	NA	1068	0	0	0	1	1	0	0	1		AGAAGTTAAGAAATCAAGTAAATGTTTGATTTTTATAGTAAGATTAAATTC
4464	'-'	1	1	5.91	>100	9.95	1	Cj0003	DNA gyrase subunit B	NA	2310	0	0	0	1	1	0	0	1		TTTGAGTTTGAACGAAAGCTCGAATTTCATTTTCGTTGATATAATGATTTA
6525	'-'	1	1	804.97	19.62	3.75	1	Cj0005c	molydopterin containing oxidoreductase	27	1239	1	0	0	0	1	0	0	0		ATTAATTATATTAATTATTTAAATTTTTAAAATTTATAATAAAATAAAAGA
6679	'+'	1	1	6.65	9.5	9.83	1	Cj0006	putative Na%2B%2FH%2B antiporter family protein	24	1308	0	1	0	0	1	0	0	0		TCATCATATGTTCGAGTTTTATTACATTTTAACTAAGTTTTTTCTACAATT
6683	'+'	1	1	156.71	16.14	11.15	1	Cj0006	putative Na%2B%2FH%2B antiporter family protein	20	1308	1	0	0	0	1	0	0	0		CATATGTTCGAGTTTTATTACATTTTAACTAAGTTTTTTCTACAATTAAAT
8103	'+'	1	1	79.83	5.41	8.13	1	Cj0007	glutamate synthase large subunit	41	4491	1	0	0	0	1	0	0	0		TAAGATAAAAATTATATCGATTTTAAAAAAATGTATGCTATAATCCTTATA
11739	'+'	1	1	11.09	2.2	3.28	1	Cj0007	glutamate synthase large subunit	NA	4491	0	0	1	0	1	0	0	0		AAGTGTGCAAGGTAAAGCAGGAAAGCTAAATTTAGATAAAATTTTAAAATC
11812	'-'	1	1	8.13	4	11.35	1	Cj0007	glutamate synthase large subunit	NA	4491	0	0	0	1	1	0	0	1		GGCTCTTTTTTCTCCACAGCATTTTTACAAAGTGGTAGTAAAATTCTATAA
12085	'-'	1	1	10.53	>100	21	1	Cj0007	glutamate synthase large subunit	NA	4491	0	0	0	1	1	0	0	1		TCTTCAGGTGAAAAAGTGGCTTCATTTGAAATTTTTGCTATGATTTTACCA
13687	'-'	1	1	412.47	3.74	8.55	1	Cj0008	hypothetical protein	NA	1752	0	0	0	1	1	0	0	1		TTTGTCAAATTTTTATGATAAATAAAATATAAAATGGGTAAAATAGCATTA
13787	'+'	1	1	89.44	2.53	5.82	1	Cj0008	hypothetical protein	NA	1752	0	0	1	0	1	0	0	0		ATAATATAGTAGATTCTGTCAAGTGTAATGAAAATAGAGCTATAATAAAAA
14034	'-'	1	1	3.7	>100	6.63	1	Cj0008	hypothetical protein	NA	1752	0	0	0	1	1	0	0	1		CTTTATGAAAATTATTATTTTTATAATCTAAATTTGGATAAAGTAAAGATA
14543	'+'	1	1	8.87	8	3.32	1	Cj0009	glutamate synthase subunit beta	NA	1446	0	0	1	0	1	0	0	0		ACCTTTGGATAAAAAAGAACAAGAAGTTCAAGGTGGACGATGTATGGATTG
15907	'+'	1	1	4.44	7	5.29	1	Cj0010c	ribonuclease HII	NA	576	0	0	0	1	1	0	0	1		AAACTTTTTCGGTGGAGTTTGCAAATTCCAAATTTAGCTATAAATTCTTTA
16567	'+'	1	1	3.1	>100	5.53	1	Cj0011c	putative non-specific DNA binding protein	NA	240	0	0	0	1	1	0	0	1		TAAGATCATCAATACTTGTAAAATTTGCTTCTTTGCGGTATTCTAAAATCG
16718	'-'	1	0	56.18	3.81	1.4	1	Cj0011c	putative non-specific DNA binding protein	27	240	1	0	0	0	1	0	0	0		ATTTTTGGGTTAAGTTAAGAAATTCTTATCCTTTTTAAGATAATATTATAA
16731	'+'	1	1	4.8	>100	7.37	1	Cj0011c	putative non-specific DNA binding protein	NA	240	0	0	0	1	1	0	0	1		AATTTTTTCATTTTCTTATCCTTTTATTAAAAAATAATTATAATATTATCT
16731	'+'	1	1	4.8	>100	7.37	1	Cj0012c	non-haem iron protein	NA	648	0	0	0	1	1	0	0	1		AATTTTTTCATTTTCTTATCCTTTTATTAAAAAATAATTATAATATTATCT
17425	'-'	1	1	250.21	3.67	2.73	1	Cj0012c	non-haem iron protein	22	648	1	0	0	0	1	0	0	0		ATAAAAATTATTAATTGACAAAAATATTTTTTTATAATACAATACTTTTTG
17736	'+'	1	0	9.29	5.29	1.04	1	Cj0013	dihydroxy-acid dehydratase	NA	1677	0	0	1	0	1	0	0	0		GATATAATCCCAGGGCATTATTTTTTAAATGATTATGCTAAAATCATTAAA
19808	'-'	1	1	598	1.97	8.99	1	Cj0014c	putative integral membrane protein	33	525	1	0	0	0	1	0	0	0		TTTATACTCCTATTTTCAATATGTTTTAAATAAAAATATTATAAATTCAAA
20301	'+'	1	1	4.07	2.6	5.39	1	Cj0015c	hypothetical protein	NA	1227	0	0	0	1	1	0	0	1		TCTTTCATTAATAAGTTTCATTTCATAATCATTTATGATATCATGAAGTCC
21129	'-'	1	1	122.71	48.43	2.65	2	Cj0015c	hypothetical protein	36	1227	1	0	0	0	1	0	0	1		ACAAAGTGCTTTTTTACTCATTTTTATCCTTAAATTTGCTATAATTTCACA
21129	'-'	1	1	122.71	48.43	2.65	2	Cj0016	putative transcriptional regulatory protein	NA	675	0	0	0	1	1	0	0	1		ACAAAGTGCTTTTTTACTCATTTTTATCCTTAAATTTGCTATAATTTCACA
21135	'+'	1	1	177.04	4.26	4.18	2	Cj0016	putative transcriptional regulatory protein	24	675	1	0	0	0	1	0	0	1		GTTTATCATGCTTTTGCCTTTTTTTTAAAAATTTTCGTTAAAATTGTGAAA
21135	'+'	1	1	177.04	4.26	4.18	2	Cj0015c	hypothetical protein	NA	1227	0	0	0	1	1	0	0	1		GTTTATCATGCTTTTGCCTTTTTTTTAAAAATTTTCGTTAAAATTGTGAAA
22428	'-'	1	1	5.54	>100	2.65	1	Cj0017c	disulphide bond formation protein	NA	1527	0	0	1	0	1	0	0	0		TGATCCTTATTTTTCAGCTTCTATCGATCCAATCATCGGTATCATACCTTA
23582	'-'	1	1	61.72	34.4	17.74	1	Cj0018c	disulphide bond formation protein	23	168	1	0	0	0	1	0	0	0		TTTCAATAAAAATTTTATTTTTAATTTATGTTTTTCAAGTAAAATTAGCAG
25350	'-'	1	0	6.65	10	1.39	1	Cj0019c	putative MCP-domain signal transduction protein	NA	1779	0	0	1	0	1	0	0	0		TATCTACACTAGTTTTAGCTTTCATTCTTGTTTTATTAGGTATTATTTTTA
26217	'+'	1	1	2.96	>100	>100	1	Cj0020c	cytochrome C551 peroxidase	NA	915	0	0	0	1	1	0	0	1		TATGGCAAGTATTGCACGAAACTTTTCCATCTTTGGATAAACTTTTATCCA
26381	'-'	1	1	149.32	4.27	7.28	1	Cj0020c	cytochrome C551 peroxidase	34	915	1	0	0	0	1	0	0	0		ATAAAAAATATCAATTATTAAACAATTTACTAAAATTACACTATAATGGCA
26797	'-'	1	1	19.22	14	2.08	1	Cj0021c	putative fumarylacetoacetate %28FAA%29 hydrolase family protein	NA	879	0	0	1	0	1	0	0	0		AAATCAAAGCTAAAGATGCAAAAGATTATATCTTTGGCTATACTATTATCA
27243	'+'	1	1	2.96	>100	13.26	1	Cj0021c	putative fumarylacetoacetate %28FAA%29 hydrolase family protein	NA	879	0	0	0	1	1	0	0	1		TTTCAATGCCAAGATCATCAAAACTTACAATTTTTCCACTAGAATTTAGTA
27767	'-'	1	1	6.28	8.5	2.82	1	Cj0022c	putative ribosomal pseudouridine synthase	NA	903	0	0	1	0	1	0	0	0		TTATAGTTGATAAAGCTATAAATTTAACTAAAAACTACGATGATGTAAAAA
28342	'+'	1	1	329.68	2.02	6.92	2	Cj0023	adenylosuccinate lyase	40	1329	1	0	0	0	1	0	0	1		TTATGTAGGCCATTTAATAACTTTCTTAGGATAATTTGATATAATTTCTGT
28342	'+'	1	1	329.68	2.02	6.92	2	Cj0022c	putative ribosomal pseudouridine synthase	NA	903	0	0	0	1	1	0	0	1		TTATGTAGGCCATTTAATAACTTTCTTAGGATAATTTGATATAATTTCTGT
28352	'-'	1	1	51	8.88	4.13	2	Cj0022c	putative ribosomal pseudouridine synthase	48	903	1	0	0	0	1	0	0	1		TCTGCTATATCTTTCAACCATCTTTGAAACCTTTTTAGCTATAATTTTATA
28352	'-'	1	1	51	8.88	4.13	2	Cj0023	adenylosuccinate lyase	NA	1329	0	0	0	1	1	0	0	1		TCTGCTATATCTTTCAACCATCTTTGAAACCTTTTTAGCTATAATTTTATA
30021	'+'	1	0	5.26	2.13	1.4	1	Cj0024	ribonucleotide-diphosphate reductase subunit alpha	NA	2370	0	0	1	0	1	0	0	0		ATTTGATTTATATAAAAAAGTTAATGGTATGAATCGCTATAATCATTTGCG
33592	'-'	1	1	14.24	26	7.84	1	Cj0025c	putative sodium:dicarboxylate family transmembrane symporter	73	1386	1	0	0	0	1	0	0	0		ATAAATCATACTAATTTTATCTTATTTAAAATATTTTTATGCTACCATTTA
34360	'+'	1	1	13.67	38	3.92	2	Cj0027	CTP synthetase	22	1632	1	0	0	0	1	0	0	1		TTACTTAAAATTCTAATGAAATAAAAAGTTTTATCAAGCTATAATTAGATA
34360	'+'	1	1	13.67	38	3.92	2	Cj0026c	FAD-dependent thymidylate synthase	NA	624	0	0	0	1	1	0	0	1		TTACTTAAAATTCTAATGAAATAAAAAGTTTTATCAAGCTATAATTAGATA
36257	'+'	1	1	11.83	2.88	2.71	1	Cj0028	putative single-stranded-DNA-specific exonuclease	NA	1572	0	0	1	0	1	0	0	0		ATTATGGCAGAATTTTTCGATGATATAGGTTTTGATTATATTATAAGAATT
36420	'-'	1	1	3.33	>100	3.32	1	Cj0028	putative single-stranded-DNA-specific exonuclease	NA	1572	0	0	0	1	1	0	0	1		ATCTTTTTGCTTTGGATTGATAATGGCAAAAGCATCAGGTAAAATATCTTG
37596	'+'	1	1	22.18	2.43	4.23	1	Cj0029	cytoplasmic L-asparaginase	71	996	1	0	0	0	1	0	0	0		AGTTTGTTGTTAAAGAGATTTTATAAAAATTTTTACTTATAATTTGCATTA
38340	'+'	1	1	13.31	5	2.67	1	Cj0029	cytoplasmic L-asparaginase	NA	996	0	0	1	0	1	0	0	0		TTTTGATGTAAGCAAACTCACAAGTTTGCCAAAAGTAGATATTCTTTATAG
38730	'-'	1	1	234.32	5.4	5.01	2	CjNC9	CjNC9	0	52	1	0	0	0	1	0	0	1		AATGGGGGCTATATTTTAATGATAATAAAAAATACAAGATATAATATACTA
38730	'-'	1	1	234.32	5.4	5.01	2	Cj0029	cytoplasmic L-asparaginase	NA	996	0	0	0	1	1	0	0	1		AATGGGGGCTATATTTTAATGATAATAAAAAATACAAGATATAATATACTA
38882	'+'	1	1	37.94	6.03	8.73	1	orphan	orphan	NA	NA	0	0	0	0	1	0	0	0		TTAATCCTTTATTTAATCCCCTTTTAAGTTTAATTGGTTATACTTTCATTT
40741	'+'	1	1	137.18	2.13	3.26	2	Cjp01	tRNA-Ala	125	76	0	1	0	0	1	0	0	0		AGTGGAATCAGCGACTGGGGTGAAGTCGTAACAAGGTAACCGTAGGAGAAC
40741	'+'	1	1	137.18	2.13	3.26	2	Cjr01	16S ribosomal RNA	NA	1513	0	0	1	0	1	0	0	0		AGTGGAATCAGCGACTGGGGTGAAGTCGTAACAAGGTAACCGTAGGAGAAC
40866	'+'	1	1	54.09	3.71	3.04	1	Cjp01	tRNA-Ala	0	76	0	1	0	0	1	0	0	0		ATTGATTCTTGTTTAGATTTCAAAGATTGATGATAAAGCTAATTGTTTATG
41200	'+'	1	1	5.17	4.75	4.38	1	orphan	orphan	NA	NA	0	0	0	0	1	0	0	0		AATAGATATAAGTAGCATATACATTATGCATTTATATTTATAATGATTATG
41214	'+'	1	1	37.58	2.88	7.36	1	orphan	orphan	NA	NA	0	0	0	0	1	0	0	0		GCATATACATTATGCATTTATATTTATAATGATTATGTTAATATATATACT
41491	'-'	1	1	3.7	>100	46.42	1	Cjr02	23S ribosomal RNA	NA	2890	0	0	0	1	1	0	0	1		TTCTAAAACGCATCACTTCCTTGTTAAAGTTTTTATGATAAGACTTCTTTA
45311	'+'	1	1	8.87	>100	3.03	1	Cj0030	hypothetical protein	NA	1398	0	0	1	0	1	0	0	0		GGATAGATATTTTAATAACATTAAGTGATAAAAGATATATTATAATAGAAA
45978	'-'	1	1	6.28	>100	14.92	1	Cj0030	hypothetical protein	NA	1398	0	0	0	1	1	0	0	1		TACATGGATATATGCTTTCATTCTTATAATCAACAGGATAAAATATAAATA
46072	'+'	1	1	15.52	>100	2.94	1	Cj0030	hypothetical protein	NA	1398	0	0	1	0	1	0	0	0		CCATGTATATATATTTATTTTAAAAAAAAATACTATGATATTATTGGTTTG
46402	'+'	1	1	93.88	8.09	3.94	1	Cj0031	putative type IIS restriction%2Fmodification enzyme	22	3733	1	0	0	0	1	0	0	0		TTAAATTCTTAAAAAATTTTATATAAAAGTAAAATTTGATAAAATACAAAA
46790	'-'	1	1	14.86	6.33	3.26	1	Cj0031	putative type IIS restriction%2Fmodification enzyme	NA	3733	0	0	0	1	1	0	0	1		GATGATAATAAATTTTAAGCTAAAACTATACTCTCTATTTCTAAAATAATA
49490	'+'	1	1	8.05	27	6.39	1	Cj0031	putative type IIS restriction%2Fmodification enzyme	NA	3733	0	0	1	0	1	0	0	0		AAAAGAAATGAAATTTTAGCAAATTGCAAAGATGAAGCTGAAAAAGAACGC
50251	'-'	1	1	4.8	14	15.88	1	Cj0031	putative type IIS restriction%2Fmodification enzyme	NA	3733	0	0	0	1	1	0	0	1		TTGTTTATTTTTCCTTTTATATCTCCAATAATATCTTGTATAATTTTATTA
50251	'-'	1	1	4.8	14	15.88	1	Cj0033	putative integral membrane protein	NA	1782	0	0	0	1	1	0	0	1		TTGTTTATTTTTCCTTTTATATCTCCAATAATATCTTGTATAATTTTATTA
50577	'-'	1	1	64.68	18.5	7	1	Cj0033	putative integral membrane protein	NA	1782	0	0	0	1	1	0	0	1		GTTTTTTGATTTGTTCTATGGGTGTTTTCTTATCTATTTTATAATCAAATA
51353	'+'	1	1	7.76	8	18.24	1	Cj0033	putative integral membrane protein	NA	1782	0	0	1	0	1	0	0	0		CTTTGTTTGTTTTTGGTTTTACTTGGCTTCACGATGATAAACTAGAAGATA
51744	'-'	1	1	4.44	7	5.39	1	Cj0033	putative integral membrane protein	NA	1782	0	0	0	1	1	0	0	1		TTAAAGGGTGAATTACATTAGGTTGTTTTATGAGCATTATAATAAATACTA
52688	'-'	1	1	20.33	6	2.28	2	Cj0034c	putative periplasmic protein	20	702	1	0	0	0	1	0	0	0		CTTTTGTAATGTGTGCTTGCGTATTGGTTGCAAATATGATATATTTTCTAA
52688	'-'	1	1	20.33	6	2.28	2	Cj0035c	putative efflux protein	NA	1203	0	0	1	0	1	0	0	0		CTTTTGTAATGTGTGCTTGCGTATTGGTTGCAAATATGATATATTTTCTAA
55646	'+'	1	1	40.66	37.67	21.22	1	Cj0037c	putative cytochrome C	NA	1044	0	0	0	1	1	0	0	1		AAAGGCATGGCTGATTTTAAAAATCTTGCTAAAAATGGTATCATAGCCATG
57012	'+'	1	1	9.24	>100	7.09	1	Cj0038c	putative poly%28A%29 polymerase family protein	NA	648	0	0	0	1	1	0	0	1		CAAAACGACGCAAAAACAAATTTAAAGCATTAATTTGTAATTCTTTTTGTG
57453	'-'	1	0	5.26	2.62	1.66	2	Cj0038c	putative poly%28A%29 polymerase family protein	242	648	1	0	0	0	1	0	0	0		TACTTTTCATAGAGCCTCAAACTAAAGTTTATACCGGTATGATTATAGGTG
57453	'-'	1	0	5.26	2.62	1.66	2	Cj0039c	GTP-binding protein TypA	NA	1809	0	0	1	0	1	0	0	0		TACTTTTCATAGAGCCTCAAACTAAAGTTTATACCGGTATGATTATAGGTG
58527	'-'	1	1	18.48	5.55	3.46	1	Cj0039c	GTP-binding protein TypA	NA	1809	0	0	1	0	1	0	0	0		TAGCCCTAGATGCAAACGATGAGCAACTTGACTTTGCTATAGTTTATGCTG
59050	'-'	1	1	233.21	2.85	8.82	1	Cj0039c	GTP-binding protein TypA	31	1809	1	0	0	0	1	0	0	0		TCCAAGTTTTGATACTTTGTAGTTTAAGTTAAATTTTTGTATAATTTAAGC
59056	'-'	1	1	11.46	32	6.05	2	Cj0039c	GTP-binding protein TypA	37	1809	0	1	0	0	1	0	0	1		AAGTGTTCCAAGTTTTGATACTTTGTAGTTTAAGTTAAATTTTTGTATAAT
59056	'-'	1	1	11.46	32	6.05	2	Cj0040	hypothetical protein	NA	324	0	0	0	1	1	0	0	1		AAGTGTTCCAAGTTTTGATACTTTGTAGTTTAAGTTAAATTTTTGTATAAT
59125	'+'	1	1	47.38	6.88	3.26	1	Cj0040	hypothetical protein	29	324	1	0	0	0	1	0	0	0		TAAACTACAAAGTATCAAAACTTGGAACACTTCTTGCTTTAAAAACTTATG
60583	'-'	1	1	17.37	24.5	5.07	1	Cj0041	putative flagellar hook-length control protein	NA	1797	0	0	0	1	1	0	0	1		TTTTAGGCTCTTTATTTAGATTAAAATCTTTTTGTGTTAAATTTGAAACTA
61812	'-'	1	1	2.22	>100	9.95	1	Cj0042	flagellar basal body rod modification protein	NA	885	0	0	0	1	1	0	0	1		TAGCATCGCTTTTTTCACTGAAAACAAGTTTATTATTGCTATCATAAATTT
62258	'+'	1	0	12.57	4.4	1.56	1	Cj0043	flagellar hook protein	NA	1638	0	0	1	0	1	0	0	0		ACAAAGAGGAAAAGGCATAAGCCATGATGAATTCATTTTATAATGGGATTT
62361	'-'	1	1	12.2	5.71	6.96	1	Cj0043	flagellar hook protein	NA	1638	0	0	0	1	1	0	0	1		AACCACCTTGAGCAGGGTTGGTTGATTGGGTTGTTATGGTAGTATAAAAAA
63946	'+'	1	1	5.17	>100	13.26	1	Cj0044c	hypothetical protein	NA	1872	0	0	0	1	1	0	0	1		TTTAAAAATAATTTTAATTTCTTCTATGTCGCTTTCGCTATAATTATGGCT
64155	'-'	1	1	22.55	21.33	3.38	1	Cj0044c	hypothetical protein	NA	1872	0	0	1	0	1	0	0	0		AAAATACAATCATCTTAGCATTTCGTATAAAAAACTTGTAAAATTAAAATA
64589	'+'	1	1	2.48	>100	7.94	1	Cj0044c	hypothetical protein	NA	1872	0	0	0	1	1	0	0	1		TTTCCACCCATGCAGTTTTCAACAAATACATTTTTAGCTATAATTGTCCCA
64915	'+'	1	1	46.2	>100	8.8	1	Cj0044c	hypothetical protein	NA	1872	0	0	0	1	1	0	0	1		TGTTTTAAGCCCTATTTGTGATAATTTTAAATTATTTGCGATACAATATCC
66049	'+'	1	1	36.22	4.48	9.12	1	Cj0045c	putative iron-binding protein	NA	723	0	0	0	1	1	0	0	1		TTGTTTGATTGATTTTAGTTTTATGTATTGTTCTAAGGTATAATGGATTTC
66492	'-'	1	1	449.8	9.51	3.85	1	Cj0045c	putative iron-binding protein	26	723	1	0	0	0	1	0	0	0		ATTCATTTGTCAAATTATTATTTTATTTTCAAAAAATACGATATAAAAATA
66641	'+'	1	1	8314.74	4.73	22.7	1	SRP_RNA_Cjs03	SRP_RNA_Cjs03	0	108	1	0	0	0	1	0	0	0		GAATCTTAACAACTCAAGGCTTTTTAAGTATATTATGATATAATTTTTAAG
66863	'+'	1	1	272.76	>100	12.9	1	Cj0046	pseudo	122	1520	0	1	0	0	1	0	0	0		AAATTATAATTTTAAGATTTATTAAAATATTAGTTAACTAGAATTTAAGCA
67215	'-'	1	1	129.73	5	8.82	1	Cj0046	pseudo	NA	1520	0	0	0	1	1	0	0	1		ATTTTAAATTTGATATAGCAGTATTTACCTTTTCATCTTATACTCTTTTGA
67238	'+'	1	1	1.86	>100	3.87	1	Cj0046	pseudo	NA	1520	0	0	1	0	1	0	0	0		AAATACTTCAGTACTTGATTTTTTATATCAAAAGAGTATAAGATGAAAAGG
68348	'+'	1	1	3.7	6	18.24	1	Cj0046	pseudo	NA	1520	0	0	1	0	1	0	0	0		CTTTTTTATGCTTTTATTATGATAGCTTCAGGTAATGTTATGATGGCATTA
69587	'+'	1	1	8.13	5.4	>100	1	Cj0053c	tRNA-specific 2-thiouridylase MnmA	NA	1017	0	0	0	1	1	0	0	1		TAGAATTTTCATTAAATTTCCTTTAAAGTATTAATTATAAAATCCAAGTCG
69587	'+'	1	1	8.13	5.4	>100	1	Cj0054c	putative lysine decarboxylase family protein	NA	606	0	0	0	1	1	0	0	1		TAGAATTTTCATTAAATTTCCTTTAAAGTATTAATTATAAAATCCAAGTCG
69595	'-'	1	1	18.85	7.37	2.31	2	Cj0053c	tRNA-specific 2-thiouridylase MnmA	47	1017	0	1	0	0	1	0	0	0		CTTTACTCAAACTTGAAGTGATTTCTAAAGGAGATGAGTTAAAGTATAAAA
69595	'-'	1	1	18.85	7.37	2.31	2	Cj0054c	putative lysine decarboxylase family protein	NA	606	0	0	1	0	1	0	0	0		CTTTACTCAAACTTGAAGTGATTTCTAAAGGAGATGAGTTAAAGTATAAAA
70175	'-'	1	1	277.56	1.97	4.29	1	Cj0054c	putative lysine decarboxylase family protein	22	606	1	0	0	0	1	0	0	0		AAACTTATATAATAAAGAACTTATTATAAATTTTTAGCTAGAATGGAATTT
70207	'-'	1	1	7.39	4	7.66	1	Cj0054c	putative lysine decarboxylase family protein	54	606	0	1	0	0	1	0	0	0		AAATTCCTAATCTTAATAAAATAAACCTATTAAAACTTATATAATAAAGAA
70558	'-'	1	1	22.61	6.62	2.34	1	Cj0055c	hypothetical protein	NA	825	0	0	1	0	1	0	0	0		AATACATAGATTTTAAGCAAAGATACGATGAATTTGTGAAAGAATACGAAA
71274	'-'	1	1	32.51	3.28	3.48	2	Cj0055c	hypothetical protein	176	825	1	0	0	0	1	0	0	0		GTATAGTGGGCGATGACCCTTATCGTAACTTTCTTGGATATACTGTGAAAA
71274	'-'	1	1	32.51	3.28	3.48	2	Cj0056c	hypothetical protein	NA	417	0	0	1	0	1	0	0	0		GTATAGTGGGCGATGACCCTTATCGTAACTTTCTTGGATATACTGTGAAAA
71756	'-'	1	1	163.73	4.16	3.02	1	Cj0056c	hypothetical protein	185	417	1	0	0	0	1	0	0	0		AAATTCACTTAACTTTCAAAGCAAGATTAAACTTTTGCTAGAATAAGTCGA
71935	'+'	1	1	32.89	>100	4.74	1	Cj0057	putative periplasmic protein	70	855	1	0	0	0	1	0	0	0		GCAAGTAAAAATATTTAAAGATTTTAAAATATTTTATCTTAGAATAATAAA
72542	'+'	1	1	8.13	>100	7.18	1	Cj0057	putative periplasmic protein	NA	855	0	0	1	0	1	0	0	0		TACAAGCTAGTTTAAGGGGATATAGCGATCCTGTAGTTTATAGTATTTATA
73241	'+'	1	1	22.91	15.5	9.79	1	Cj0058	putative peptidase C39 family protein	NA	600	0	0	1	0	1	0	0	0		TGTAAAAATTGAAGATGATCCACGCTTTCCACATTTTGTTATAATTATCAA
73983	'+'	1	1	10.99	36.5	>100	1	Cj0059c	flagellar motor switch protein FliY	NA	843	0	0	0	1	1	0	0	1		AAAATCTACGCTTTCAGGCACAAATTCACAAGATTCTATGCTAAAATCCAT
74445	'-'	1	0	26.98	25.33	1.37	2	Cj0059c	flagellar motor switch protein FliY	111	843	1	0	0	0	1	0	0	0		TTAGCACAAATTGGATTGCATCGTTTTAGAAAATCTATTAAAATTTTAGAA
74445	'-'	1	0	26.98	25.33	1.37	2	Cj0060c	flagellar motor switch protein FliM	NA	1080	0	0	1	0	1	0	0	0		TTAGCACAAATTGGATTGCATCGTTTTAGAAAATCTATTAAAATTTTAGAA
74693	'-'	1	0	17.34	5.31	1.2	1	Cj0060c	flagellar motor switch protein FliM	NA	1080	0	0	1	0	1	0	0	0		ATTTAGAAAGTATATTAAGCCGTTTAGCAAACCGTGATATTATGATGGGTG
78261	'+'	1	1	41.02	5.44	11.02	1	Cj0064c	flagellar biosynthesis regulator FlhF	NA	1455	0	0	0	1	1	0	0	1		TTTTTCAAATTGCTTTTCAAAATTTTCTATTTTTTTATTATAATTTGGATT
78691	'+'	1	1	4.07	>100	12.48	1	Cj0064c	flagellar biosynthesis regulator FlhF	NA	1455	0	0	0	1	1	0	0	1		CTGCGATTTAAGGTTTTAGGACGAATTTGTTTATTTGTTATAATTAAAGCT
78691	'+'	1	1	4.07	>100	12.48	1	Cj0065c	putative 2-amino-4-hydroxy-6-hydroxymethyldihydropteridine pyrophosphokinase	NA	474	0	0	0	1	1	0	0	1		CTGCGATTTAAGGTTTTAGGACGAATTTGTTTATTTGTTATAATTAAAGCT
78734	'+'	1	1	18.48	3.15	21.84	1	Cj0064c	flagellar biosynthesis regulator FlhF	NA	1455	0	0	0	1	1	0	0	1		TTAAAGCTTTATCTCCGTAATCTTCTTTTACTTTGGGTATAATTTGTTCTG
78734	'+'	1	1	18.48	3.15	21.84	1	Cj0065c	putative 2-amino-4-hydroxy-6-hydroxymethyldihydropteridine pyrophosphokinase	NA	474	0	0	0	1	1	0	0	1		TTAAAGCTTTATCTCCGTAATCTTCTTTTACTTTGGGTATAATTTGTTCTG
79765	'-'	1	1	3374.02	>100	10.14	2	Cj0066c	3-dehydroquinate dehydratase	29	480	1	0	0	0	1	0	0	1		CAAAAATTACATTGTAGCAAAAATTTATTTTTAAAATGTTATAATAAAAGG
79765	'-'	1	1	3374.02	>100	10.14	2	Cj0067	chlorohydrolase	NA	1230	0	0	0	1	1	0	0	1		CAAAAATTACATTGTAGCAAAAATTTATTTTTAAAATGTTATAATAAAAGG
79810	'+'	1	1	306.76	2.47	11.04	2	Cj0067	chlorohydrolase	17	1230	1	0	0	0	1	0	0	1		TTTAACCTTTTATTATAACATTTTAAAAATAAATTTTTGCTACAATGTAAT
79810	'+'	1	1	306.76	2.47	11.04	2	Cj0066c	3-dehydroquinate dehydratase	NA	480	0	0	0	1	1	0	0	1		TTTAACCTTTTATTATAACATTTTAAAAATAAATTTTTGCTACAATGTAAT
80724	'+'	1	1	7.02	>100	3.32	1	Cj0067	chlorohydrolase	NA	1230	0	0	1	0	1	0	0	0		ATTGTGCATTTTCAAATCGCCTTTTAAGTCAAAAAAGCTTAGATTTAAAAA
81950	'+'	1	1	21.07	2.6	3.34	1	Cj0069	hypothetical protein	69	1032	0	1	0	0	1	0	0	0		TCGCTTATAAAACTAATAGCAGTTTTATAAACGCTAGATAAAATATATAAA
81995	'+'	1	1	445.36	9.86	5.05	1	Cj0069	hypothetical protein	24	1032	1	0	0	0	1	0	0	0		TATAAATATTTTTATTTAATTTTTGTAATATTTTTATGCAATAATTATTTA
82079	'-'	1	1	3.56	>100	19.06	1	Cj0069	hypothetical protein	NA	1032	0	0	0	1	1	0	0	1		CCAACCCTTAGCTTTTAAGGCATTTACCATAGGCATGGTATCTTTTCTATA
82118	'+'	1	1	7.39	3	2.19	1	Cj0069	hypothetical protein	NA	1032	0	0	1	0	1	0	0	0		GTGAAGATGGCTATAGAAAAGATACCATGCCTATGGTAAATGCCTTAAAAG
83093	'+'	1	1	53.96	2.08	5.69	1	Cj0070c	hypothetical protein	NA	159	0	0	0	1	1	0	0	1		AGGCTTAGTCTTTAAGCTTAATGTCCATTTTATTATTGTAAAATGGACATT
83093	'+'	1	1	53.96	2.08	5.69	1	CjNC11	CjNC11	NA	155	0	0	0	1	1	0	0	1		AGGCTTAGTCTTTAAGCTTAATGTCCATTTTATTATTGTAAAATGGACATT
83265	'-'	1	1	90.55	10.8	4.93	1	CjNC11	CjNC11	0	155	1	0	0	0	1	0	0	0		AAAAAATATTCAGAAAATTTCTAATTAACTATTTATGCGTTAAAATAATAA
83771	'+'	1	1	2.48	3.67	6.08	1	Cj0072c	pseudo	NA	602	0	0	0	1	1	0	0	1		TTACTAAAATGTTCTTTCATATAGTTAAAAAGTTCTGTTAAAATTTCTTTG
88746	'-'	1	1	5009.84	2.9	6.45	1	Cj0076c	L-lactate permease	28	1683	1	0	0	0	1	0	0	0		TTGCTCTATAATTTTTTTATTTTAATGTAATTTTTTGTTACAATAAATTTA
88785	'+'	1	1	2.59	>100	>100	1	Cj0076c	L-lactate permease	NA	1683	0	0	0	1	1	0	0	1		ATTATTATGTATAAATTTATTGTAACAAAAAATTACATTAAAATAAAAAAA
89393	'+'	1	1	12.94	9.75	3.95	1	Cj0077c	cytolethal distending toxin C	NA	570	0	0	0	1	1	0	0	1		AATTCCCGTTTCTAAGCTTCTTATAGAAACCATTTCGGTAAAATCTTTCAA
89393	'+'	1	1	12.94	9.75	3.95	1	Cj0078c	cytolethal distending toxin B	NA	798	0	0	0	1	1	0	0	1		AATTCCCGTTTCTAAGCTTCTTATAGAAACCATTTCGGTAAAATCTTTCAA
89549	'+'	1	1	4.34	15	3.4	1	Cj0077c	cytolethal distending toxin C	NA	570	0	0	0	1	1	0	0	1		GATCTGAAACTATATGAGATCTTAAACTTGCAAGCATTAAAATCGCAGCTA
89549	'+'	1	1	4.34	15	3.4	1	Cj0078c	cytolethal distending toxin B	NA	798	0	0	0	1	1	0	0	1		GATCTGAAACTATATGAGATCTTAAACTTGCAAGCATTAAAATCGCAGCTA
91100	'-'	1	1	8.13	2.83	3.86	2	Cj0079c	cytolethal distending toxin A	30	807	1	0	0	0	1	0	0	1		ACATTTTTAAAAAGCGGAAAATTATAATGAAATTTATGTTATTATTTTCTT
91100	'-'	1	1	8.13	2.83	3.86	2	Cj0080	hypothetical protein	NA	270	0	0	0	1	1	0	0	1		ACATTTTTAAAAAGCGGAAAATTATAATGAAATTTATGTTATTATTTTCTT
91102	'-'	1	1	8.13	2.83	3.86	2	Cj0079c	cytolethal distending toxin A	32	807	0	1	0	0	1	0	0	1		AAACATTTTTAAAAAGCGGAAAATTATAATGAAATTTATGTTATTATTTTC
91102	'-'	1	1	8.13	2.83	3.86	2	Cj0080	hypothetical protein	NA	270	0	0	0	1	1	0	0	1		AAACATTTTTAAAAAGCGGAAAATTATAATGAAATTTATGTTATTATTTTC
91136	'+'	1	1	2.79	>100	>100	2	Cj0080	hypothetical protein	11	270	1	0	0	0	1	0	0	1		GTATTTAAATTTTTAAGAAAATAATAACATAAATTTCATTATAATTTTCCG
91136	'+'	1	1	2.79	>100	>100	2	Cj0079c	cytolethal distending toxin A	NA	807	0	0	0	1	1	0	0	1		GTATTTAAATTTTTAAGAAAATAATAACATAAATTTCATTATAATTTTCCG
92467	'-'	1	1	29.94	4.2	14.92	1	Cj0081	cytochrome bd oxidase subunit I	NA	1563	0	0	0	1	1	0	0	1		AGTTTCTAAAATGGATTTGTGATTTGCCATAGCTATTGTATCATTGTTTTC
92471	'-'	1	1	2.22	8	13.26	1	Cj0081	cytochrome bd oxidase subunit I	NA	1563	0	0	0	1	1	0	0	1		AATGAGTTTCTAAAATGGATTTGTGATTTGCCATAGCTATTGTATCATTGT
93292	'-'	1	1	3.33	5.5	>100	1	Cj0082	cytochrome bd oxidase subunit II	NA	1125	0	0	0	1	1	0	0	1		CATAGGTTTTAGAGCCATAAACATTATTTTCTTTTTTGCGATATTCATAAG
93977	'+'	1	1	19.59	54	4.71	2	CjNC1	CjNC1	272	96	0	1	0	0	1	0	0	0		TTACAAAGTTCTTTAACTTTAAAAAATGCAAGTTCAAGCTATTATACTCTA
93977	'+'	1	1	19.59	54	4.71	2	Cj0082	cytochrome bd oxidase subunit II	NA	1125	0	0	1	0	1	0	0	0		TTACAAAGTTCTTTAACTTTAAAAAATGCAAGTTCAAGCTATTATACTCTA
94249	'+'	1	1	173.41	4.64	3.89	2	CjNC1	CjNC1	0	96	1	0	0	0	1	0	0	1		AAAAGATAGCAAACTATAAAGCAAGATAAGATTTAAACCGATATAAGTATA
94249	'+'	1	1	173.41	4.64	3.89	2	Cj0085c	putative amino acid recemase	NA	696	0	0	0	1	1	0	0	1		AAAAGATAGCAAACTATAAAGCAAGATAAGATTTAAACCGATATAAGTATA
95342	'+'	1	1	4.8	>100	4.92	1	Cj0086c	uracil-DNA glycosylase	NA	696	0	0	0	1	1	0	0	1		ATAAAAACAAGCCCTGATTTTTCATTACTTAATTTATGTATTATAGCATCA
95834	'-'	1	1	192.56	2.03	8.96	1	Cj0086c	uracil-DNA glycosylase	31	696	1	0	0	0	1	0	0	0		TACTTCAAAAAAAATTAATATATTTTTGCAAGCTTTTTTGTTAGAATAAAA
96008	'+'	1	1	16.63	1.98	5.87	1	Cj0087	aspartate ammonia-lyase	66	1407	0	1	0	0	1	0	0	0		TTTGAAAGCAGTTTACTTATTAATCAATTATTAACTAAAAATGCGATATCA
96016	'+'	1	1	5015.53	>100	3.79	1	Cj0087	aspartate ammonia-lyase	58	1407	1	0	0	0	1	0	0	0		CAGTTTACTTATTAATCAATTATTAACTAAAAATGCGATATCATTATTTTA
98912	'+'	1	1	161.02	2.23	7.28	1	Cj0089	putative lipoprotein	29	1362	1	0	0	0	1	0	0	0		GTTAAAATTTTTTCATTAGTTTTTAAGTATATACTACGCTATAATATTCAT
102522	'+'	1	1	17	16.33	6.63	2	Cj0093	putative periplasmic protein	235	1203	1	0	0	0	1	0	0	0		ACTCAAAACATAACAAATATTATTGACAAAGTAAATAGTAAAATAAAAGCA
102522	'+'	1	1	17	16.33	6.63	2	Cj0092	putative periplasmic protein	NA	1338	0	0	1	0	1	0	0	0		ACTCAAAACATAACAAATATTATTGACAAAGTAAATAGTAAAATAAAAGCA
104037	'+'	1	1	29.94	82	5.81	1	Cj0094	50S ribosomal protein L21	81	309	0	1	0	0	1	0	0	0		TCTAAACTCTTTCTTAAATTCATCAAAAATTAAAGAAAAATTTTGTAAAAT
104043	'+'	1	1	6408.75	45.35	7.04	1	Cj0094	50S ribosomal protein L21	75	309	1	0	0	0	1	0	0	0		CTCTTTCTTAAATTCATCAAAAATTAAAGAAAAATTTTGTAAAATCGAAAT
104083	'-'	1	1	15.52	29	6.01	1	Cj0094	50S ribosomal protein L21	NA	309	0	0	0	1	1	0	0	1		TGATAATAGCATACATTGCTTTTCCTTATAAATTGGTAGTACCATAAAGCA
104939	'-'	1	1	4.95	>100	3.79	1	Cj0096	GTPase ObgE	NA	1053	0	0	0	1	1	0	0	1		TAATTCTCTTTTGCCTTTGAAATTTACAAGAGTGTGGGTATTATTATCACA
106759	'+'	1	1	62.83	6.31	8.04	1	Cj0098	methionyl-tRNA formyltransferase	25	918	1	0	0	0	1	0	0	0		GATTAATTTATTAAATTCTCTTTTAAAATCAAATAAGCTATAATTAAAACT
108199	'+'	1	0	111.48	>100	1.88	2	Cj0100	parA family protein	115	786	1	0	0	0	1	0	0	0		AAAAAAAATTTTATGGAAGAATATTTTTAGCAAGTATATGTTAGAATTCGA
108199	'+'	1	0	111.48	>100	1.88	2	Cj0099	biotin--protein ligase	NA	654	0	0	1	0	1	0	0	0		AAAAAAAATTTTATGGAAGAATATTTTTAGCAAGTATATGTTAGAATTCGA
109276	'-'	1	1	7.58	6.13	13.9	1	Cj0101	parB family protein	NA	837	0	0	0	1	1	0	0	1		AAATACAATAATAGGCTGAATAAGTCCAAATTCTTTGATAGAATTAGCAAG
109914	'+'	1	1	55.07	1.82	2.68	2	Cj0102	F0F1 ATP synthase subunit B%27	88	426	0	1	0	0	1	0	0	0		AAAAATAATGATTTTGTAATTCATTTAGAAAATATTGATAAAATTAAAAAA
109914	'+'	1	1	55.07	1.82	2.68	2	Cj0101	parB family protein	NA	837	0	0	1	0	1	0	0	0		AAAAATAATGATTTTGTAATTCATTTAGAAAATATTGATAAAATTAAAAAA
109977	'+'	1	1	1429.22	7.55	4.87	1	Cj0102	F0F1 ATP synthase subunit B%27	25	426	1	0	0	0	1	0	0	0		CTTGAAAAGCTTTAACCAAAATCTTAGCTTTTTTATGGTAAAATAGTCCTT
111657	'+'	1	1	53.59	6	2.01	1	Cj0105	F0F1 ATP synthase subunit alpha	NA	1506	0	0	1	0	1	0	0	0		GGTATATGGACTTAAGAATATTATGGCTGGAGAAATGGTAGAATTTGAAAA
111953	'+'	1	1	43.98	4.4	2.92	1	Cj0105	F0F1 ATP synthase subunit alpha	NA	1506	0	0	1	0	1	0	0	0		GAAAAAGTGTTCATGAGCCTTTACATACAGGAATTAAAGCTATTGATGCGC
112027	'-'	1	1	4.95	>100	13.26	1	Cj0105	F0F1 ATP synthase subunit alpha	NA	1506	0	0	0	1	1	0	0	1		GCAACATATATACAGATAACTCCTTGACCTCTTTGAGATATAATAGTATCA
113032	'-'	1	1	191.54	>100	8.14	1	Cj0105	F0F1 ATP synthase subunit alpha	NA	1506	0	0	0	1	1	0	0	1		AACTAGCTTCATAGCATTTGTAGTCTTTTGAGTGTTATGAACACTTTTAAT
113032	'-'	1	1	191.54	>100	8.14	1	Cj0106	F0F1 ATP synthase subunit gamma	NA	885	0	0	0	1	1	0	0	1		AACTAGCTTCATAGCATTTGTAGTCTTTTGAGTGTTATGAACACTTTTAAT
113705	'+'	1	1	188.12	26.45	2.47	2	Cj0107	F0F1 ATP synthase subunit beta	207	1398	1	0	0	0	1	0	0	0		AACTGAGCTTTTAAAAGATTTAATGAAAACGTATTTTGAGTATAATATGTA
113705	'+'	1	1	188.12	26.45	2.47	2	Cj0106	F0F1 ATP synthase subunit gamma	NA	885	0	0	1	0	1	0	0	0		AACTGAGCTTTTAAAAGATTTAATGAAAACGTATTTTGAGTATAATATGTA
115754	'+'	1	0	3.33	5.5	0.73	1	Cj0109	putative MotA%2FTolQ%2FExbB proton channel family protein	NA	555	0	0	1	0	1	0	0	0		GAATTTTGAAGCTATATTTCATTTTTTCAATAGTTCAAGTATTATTACTTA
117611	'+'	1	0	22.55	10.1	0.69	1	Cj0112	translocation protein TolB	NA	1209	0	0	1	0	1	0	0	0		ATTCAAATTTAAGTGATGAGAATTTAAAGAAAAGCTTTTATAATATCATTG
118033	'-'	1	1	5.54	>100	8.74	1	Cj0112	translocation protein TolB	NA	1209	0	0	0	1	1	0	0	1		ATTTTACTAGCTTTATTGGTATTTAAATCATAACGGTATAAAGTTGGCTTA
118705	'+'	1	1	1281.38	73.23	2.95	1	Cj0113	peptidoglycan associated lipoprotein	26	498	1	0	0	0	1	0	0	0		AAATTTCAATTTTAGGTTAAAATTAATTAAAAATTAGATATAATAATAAGA
122241	'+'	1	1	148.02	2.59	8.16	2	Cj0118	hypothetical protein	125	756	1	0	0	0	1	0	0	0		GTGAAATGGAAGGCGCAAGTGTGGCTTTGGTTTGTGATGCTTTAAAGGTGC
122241	'+'	1	1	148.02	2.59	8.16	2	Cj0117	5%27-methylthioadenosine%2FS-adenosylhomocysteine nucleosidase	NA	690	0	0	1	0	1	0	0	0		GTGAAATGGAAGGCGCAAGTGTGGCTTTGGTTTGTGATGCTTTAAAGGTGC
124762	'+'	1	1	30.31	11.25	2.04	1	Cj0122	hypothetical protein	27	690	1	0	0	0	1	0	0	0		ATATATGAGTAAAAATATTAAAAAAAATCATTTTTGCCGATTTGCTTTAGA
125964	'-'	1	0	3.72	3	1.75	1	Cj0123c	putative tRNA-dihydrouridine synthase	NA	927	0	0	1	0	1	0	0	0		TTCGACTAGGATTTAATGAAAAATATCCTGAAAAAATGGCTAAAATTTGTG
126428	'+'	1	1	5.54	>100	18.15	1	Cj0123c	putative tRNA-dihydrouridine synthase	NA	927	0	0	0	1	1	0	0	1		AAAAACCTGCCATAGGGGCTAAAAACAGGGGTTTTTTGCTAAAATCTATCA
126428	'+'	1	1	5.54	>100	18.15	1	Cj0124c	hypothetical protein	NA	987	0	0	0	1	1	0	0	1		AAAAACCTGCCATAGGGGCTAAAAACAGGGGTTTTTTGCTAAAATCTATCA
126580	'+'	1	1	4.95	>100	14.09	1	Cj0124c	hypothetical protein	NA	987	0	0	0	1	1	0	0	1		TTAACTCATCTAAAAGTCCAAATTCAGCCAAAAGATATAAATATGCTCTTA
126782	'-'	1	1	30.97	26	3.32	1	Cj0124c	hypothetical protein	NA	987	0	0	1	0	1	0	0	0		TAGAAAAAGCTAGTTATGAGCAAATTAAAAATGTAAAAATCCCTAAAAAGC
126912	'+'	1	1	2.59	>100	>100	1	Cj0124c	hypothetical protein	NA	987	0	0	0	1	1	0	0	1		TCATCTTTGATTTCATTAAGGTTTTTAAGTTTGTTATAGGCATAATTTGCA
127532	'-'	1	1	144.51	98.75	5.67	2	Cj0124c	hypothetical protein	120	987	1	0	0	0	1	0	0	0		TCTCAAAGAAGAACTTATAGAAATCGAAGATTCTTTAGATAAAATCAAAAA
127532	'-'	1	1	144.51	98.75	5.67	2	Cj0125c	hypothetical protein	NA	363	0	0	1	0	1	0	0	0		TCTCAAAGAAGAACTTATAGAAATCGAAGATTCTTTAGATAAAATCAAAAA
129097	'-'	1	1	704.81	43.38	6.75	2	Cj0127c	acetyl-CoA carboxylase subunit beta	28	843	1	0	0	0	1	0	0	0		AAATTTCCTTCTCCTAAGCCAAGACAAAAAAATTTTTGATATAATCTTAGA
129097	'-'	1	1	704.81	43.38	6.75	2	Cj0128c	putative inositol monophosphatase family protein	NA	723	0	0	1	0	1	0	0	0		AAATTTCCTTCTCCTAAGCCAAGACAAAAAAATTTTTGATATAATCTTAGA
129646	'+'	1	1	3.7	>100	>100	1	Cj0128c	putative inositol monophosphatase family protein	NA	723	0	0	0	1	1	0	0	1		TCAATCCGCTTTCTTCAGAAAAAATTTGTCCAAAACAACTAAGATATTTTA
129685	'-'	1	1	1.86	3.5	2.07	1	Cj0128c	putative inositol monophosphatase family protein	NA	723	0	0	1	0	1	0	0	0		CCCACAAAATGATCTTAAACTTTGCTCTAAATTAGGCTATGATAAAAATCA
129995	'-'	1	0	23.65	7.4	0.8	2	Cj0128c	putative inositol monophosphatase family protein	195	723	1	0	0	0	1	0	0	0		TTTGCCAATTCCGTAGAACTTAGTTTTCCTTTGATTGATAGAATCAAACTT
129995	'-'	1	0	23.65	7.4	0.8	2	Cj0129c	outer membrane protein	NA	2220	0	0	1	0	1	0	0	0		TTTGCCAATTCCGTAGAACTTAGTTTTCCTTTGATTGATAGAATCAAACTT
130484	'+'	1	1	8.13	2.05	4.88	1	Cj0129c	outer membrane protein	NA	2220	0	0	0	1	1	0	0	1		CTTAAGTGATATATATCGCTTTGTTCAAGATTATAAGTTAAGCTTACATTA
132048	'-'	1	1	357.77	2.35	9.22	2	Cj0129c	outer membrane protein	29	2220	1	0	0	0	1	0	0	1		CATACTTTCTACCTTAGTTTTTTTGTTAAATTTTTTTTGCTATTATACAGC
132048	'-'	1	1	357.77	2.35	9.22	2	Cj0130	prephenate dehydrogenase	NA	828	0	0	0	1	1	0	0	1		CATACTTTCTACCTTAGTTTTTTTGTTAAATTTTTTTTGCTATTATACAGC
132288	'+'	1	1	38.81	10.55	2.77	1	Cj0130	prephenate dehydrogenase	NA	828	0	0	1	0	1	0	0	0		ATGAGCTTATAGAATTTAAAGATTTAGCTTTATGTGATATGATTTTTGTCG
132347	'-'	1	1	5.17	>100	15.88	1	Cj0130	prephenate dehydrogenase	NA	828	0	0	0	1	1	0	0	1		AAACTTTCTATAATTTTTCTTTTTGTACTTCCAAGCTCTATAATTGTTACA
132939	'-'	1	1	4.07	>100	>100	1	Cj0130	prephenate dehydrogenase	NA	828	0	0	0	1	1	0	0	1		AATTTTCAATATTTTTGTTGCTTTTAATATAAATTCTATTATATTTTCAGT
132939	'-'	1	1	4.07	>100	>100	1	Cj0131	putative peptidase M23 family protein	NA	1374	0	0	0	1	1	0	0	1		AATTTTCAATATTTTTGTTGCTTTTAATATAAATTCTATTATATTTTCAGT
132965	'+'	1	1	187.38	6.02	4.51	1	Cj0131	putative peptidase M23 family protein	38	1374	1	0	0	0	1	0	0	0		ATTTTATAAATTTGCTAGATATTTACTGAAAATATAATAGAATTTATATTA
133257	'-'	1	1	10.22	17.5	58.02	1	Cj0131	putative peptidase M23 family protein	NA	1374	0	0	0	1	1	0	0	1		CCAAATTTTGGCAAAGCAACTTGTAAGGTAATATCTTTTAAATTAGAAATC
135677	'+'	1	1	42.5	9.85	5.09	2	Cj0134	homoserine kinase	32	879	1	0	0	0	1	0	0	0		TTTTACCAAAAAATTTACAAGAGCTTAAACTAAATAATGATAATCTTCCCT
135677	'+'	1	1	42.5	9.85	5.09	2	Cj0133	putative glycoprotease family protein	NA	402	0	0	1	0	1	0	0	0		TTTTACCAAAAAATTTACAAGAGCTTAAACTAAATAATGATAATCTTCCCT
136615	'+'	1	1	17.74	49	2.41	2	Cj0136	translation initiation factor IF-2	241	2616	0	1	0	0	1	0	0	0		ATAATGGCTTTGAAATTTGCTAAAAAATATAAAAAAAAGATATAATTTTGA
136615	'+'	1	1	17.74	49	2.41	2	Cj0135	hypothetical protein	NA	258	0	0	1	0	1	0	0	0		ATAATGGCTTTGAAATTTGCTAAAAAATATAAAAAAAAGATATAATTTTGA
136816	'+'	1	1	23.65	>100	2.49	2	Cj0136	translation initiation factor IF-2	40	2616	1	0	0	0	1	0	0	0		AAGATAAAGTCTTACAAAAAGCATTTTCTAAAATATGTAAAAATTTAAATA
136816	'+'	1	1	23.65	>100	2.49	2	Cj0135	hypothetical protein	NA	258	0	0	1	0	1	0	0	0		AAGATAAAGTCTTACAAAAAGCATTTTCTAAAATATGTAAAAATTTAAATA
141245	'-'	1	1	5.91	2.23	10.97	1	Cj0139	putative endonuclease	NA	2352	0	0	0	1	1	0	0	1		CCTGTCCCTGGAGGTCCATAAAGAATTTGATTTAATGGTATAATTTTCATA
142803	'-'	1	1	5.54	>100	2.13	1	Cj0140	hypothetical protein	NA	1332	0	0	0	1	1	0	0	1		CATTTTGGCAAAATCTCCAAAACCCCGCTTTTAGTCTGTATAATGCCGACA
143694	'+'	1	0	5.57	>100	0.9	1	Cj0140	hypothetical protein	NA	1332	0	0	1	0	1	0	0	0		AATTGTTTCATGTTAAAGCCTGATTTATATATAAAAAATAAAATGATCTTA
146533	'-'	1	0	102.81	4.13	1.6	1	Cj0143c	putative periplasmic solute binding protein	27	891	1	0	0	0	1	0	0	0		AAATATCGCTTCGAAAATTCTATGTATTAAGCTTAATATCGTTATAATTTA
146556	'+'	1	1	16.26	26	10.78	2	Cj0144	putative methyl-accepting chemotaxis signal transduction protein	149	1980	0	1	0	0	1	0	0	1		AAATATTTCCTTTCGATATAAATTTTTTAAATTATAACGATATTAAGCTTA
146556	'+'	1	1	16.26	26	10.78	2	Cj0143c	putative periplasmic solute binding protein	NA	891	0	0	0	1	1	0	0	1		AAATATTTCCTTTCGATATAAATTTTTTAAATTATAACGATATTAAGCTTA
146654	'+'	1	1	1628.43	12.97	3.4	1	Cj0144	putative methyl-accepting chemotaxis signal transduction protein	51	1980	1	0	0	0	1	0	0	0		TACTTTTATATTTAAGTAAAAATCTAGATTTTTTAATTTATAATTCTAAAA
147683	'-'	1	1	4.56	17	30.25	1	Cj0144	putative methyl-accepting chemotaxis signal transduction protein	NA	1980	0	0	0	1	1	0	0	1		TACTTCTATAGTGGAAACATTTTTTGTTTTATAGTTGATAAAATCAAAGAA
151607	'-'	1	1	478.25	93.43	5.66	1	Cj0146c	thioredoxin reductase	31	939	1	0	0	0	1	0	0	0		AATAATAATTTTTATTAACTACTATTAAGAATAATTTTTATATCATTATTA
157298	'-'	1	1	1255.98	13.36	5.48	1	Cj0153c	putative rRNA methylase	0	684	1	0	0	0	1	0	0	0		AGAAATTTATCAAAAACTGCTTTTAAGTCAAGATTAGGTAAAATTTTAATA
158367	'-'	1	1	502.28	25.28	6.79	1	Cj0155c	50S ribosomal protein L31	28	201	1	0	0	0	1	0	0	0		CTTTTCTTAAATTAATCTCTTTTTTATGTTAAATAATTTATAATCACGGCT
158457	'+'	1	1	10.22	2.64	12.16	1	Cj0156c	16S ribosomal RNA methyltransferase RsmE	NA	657	0	0	0	1	1	0	0	1		TTTAAGAAAAGTTAAAGCAAAATTTTTGAAGCTATAGCTATAATAGCTGTT
160516	'-'	1	1	721.82	7.9	7.13	2	Cj0159c	putative 6-pyruvoyl tetrahydropterin synthase	27	582	1	0	0	0	1	0	0	0		GCTGAATTTTGTATTAAGAATGGTTATAATTATTCTGATAGAATTCATATT
160516	'-'	1	1	721.82	7.9	7.13	2	Cj0160c	putative radical SAM domain protein	NA	744	0	0	1	0	1	0	0	0		GCTGAATTTTGTATTAAGAATGGTTATAATTATTCTGATAGAATTCATATT
160530	'-'	1	0	43.24	30.25	1.75	2	Cj0159c	putative 6-pyruvoyl tetrahydropterin synthase	41	582	0	1	0	0	1	0	0	0		ATGCTCAAAAAATTGCTGAATTTTGTATTAAGAATGGTTATAATTATTCTG
160530	'-'	1	0	43.24	30.25	1.75	2	Cj0160c	putative radical SAM domain protein	NA	744	0	0	1	0	1	0	0	0		ATGCTCAAAAAATTGCTGAATTTTGTATTAAGAATGGTTATAATTATTCTG
164117	'-'	1	1	2.96	>100	9.08	2	Cj0164c	prenyltransferase	26	885	1	0	0	0	1	0	0	1		AAACATTTTAATATTTATCCTAAAATTTATAAAAATTTTAGTAAAATCATA
164117	'-'	1	1	2.96	>100	9.08	2	Cj0166	tRNA delta%282%29-isopentenylpyrophosphate transferase	NA	870	0	0	0	1	1	0	0	1		AAACATTTTAATATTTATCCTAAAATTTATAAAAATTTTAGTAAAATCATA
165611	'-'	1	1	25.5	8.67	14.75	1	Cj0167c	putative integral membrane protein	31	564	1	0	0	0	1	0	0	0		AATATATCAAAATTATGTGATTTTTATCTTTGTTTGATTATAATTTCATCT
165694	'+'	1	1	12.57	>100	10.5	1	Cjp03	tRNA-Glu	34	75	0	1	0	0	1	0	0	0		ACATAATTTTGATATATTTAATTAAATTTTAAGAAATAAATATATATAATT
165700	'+'	1	1	88.87	2.82	5.9	1	Cjp03	tRNA-Glu	28	75	1	0	0	0	1	0	0	0		TTTTGATATATTTAATTAAATTTTAAGAAATAAATATATATAATTCAATTT
165893	'+'	1	1	147.84	11.81	8	1	Cj0168c	putative periplasmic protein	NA	168	0	0	0	1	1	0	0	1		TTCTATTGAAATTTAATAAATATTAATAATTTATTTTGTAGAATACGAATA
166136	'-'	1	1	497.1	>100	7.64	1	Cj0168c	putative periplasmic protein	31	168	1	0	0	0	1	0	0	0		TTTTTACAAAAAATATCTATTTGTTGATTTTTAATAATTACAATTAATTTG
166345	'+'	1	1	304.55	8.7	6.44	1	Cj0169	superoxide dismutase	28	663	1	0	0	0	1	0	0	0		GCTTTTAAGATATTTTTACTCTTTTTAATATTATTATGGTAATATTTTCAA
167067	'+'	1	1	862.26	12.64	6.1	1	Cj0170	hypothetical protein	NA	745	0	0	1	0	1	0	0	0		ACTTCACCCTGTAAAATAACTTTAATCCTTTTTGTGCTAGAATGGATTTTG
167074	'-'	1	1	2.96	>100	>100	1	Cj0169	superoxide dismutase	NA	663	0	0	0	1	1	0	0	1		TGCAGATAAAGAATTATCCATTTTTGCCCCTTTTTGTGTAGAATGTTGACT
167074	'-'	1	1	2.96	>100	>100	1	Cj0170	hypothetical protein	NA	745	0	0	0	1	1	0	0	1		TGCAGATAAAGAATTATCCATTTTTGCCCCTTTTTGTGTAGAATGTTGACT
167932	'-'	1	1	124.48	5.73	3.24	1	Cj0172c	putative saccharopine dehydrogenase	NA	1206	0	0	1	0	1	0	0	0		GCTATACTACAGGTGTTCCTGCTATGATAGGTACGAAATTAATCGCTAAAG
169136	'-'	1	1	29.94	7.75	4.59	2	Cj0172c	putative saccharopine dehydrogenase	124	1206	1	0	0	0	1	0	0	0		AATTTTACAAAAAGAATTTTTAGGGGCTTTTTGTAGGCTAAAATTACTTTA
169136	'-'	1	1	29.94	7.75	4.59	2	Cj0173c	putative iron-uptake ABC transporter ATP-binding protein	NA	909	0	0	1	0	1	0	0	0		AATTTTACAAAAAGAATTTTTAGGGGCTTTTTGTAGGCTAAAATTACTTTA
169321	'+'	1	1	4.8	>100	7.94	1	Cj0173c	putative iron-uptake ABC transporter ATP-binding protein	NA	909	0	0	0	1	1	0	0	1		TCTAAATCAAGTTTTTCTTCTATGATATTTAAATCAGGTAAAATTTGTGCA
170192	'-'	1	1	2.96	1.67	11.35	2	Cj0173c	putative iron-uptake ABC transporter ATP-binding protein	230	909	0	1	0	0	1	0	0	0		AGTTTAAATTTAAGAACGAGTTATTTTATTTTATTTTTTAAAATTCACACA
170192	'-'	1	1	2.96	1.67	11.35	2	Cj0174c	putative iron-uptake ABC transporter permease	NA	1617	0	0	1	0	1	0	0	0		AGTTTAAATTTAAGAACGAGTTATTTTATTTTATTTTTTAAAATTCACACA
170263	'-'	1	1	1.85	2.67	3.32	1	Cj0174c	putative iron-uptake ABC transporter permease	NA	1617	0	0	1	0	1	0	0	0		GTTTTTTAGCGAGTGCAATTTATTCTTTAGAGGGAGGATATAATAAAATTC
170425	'-'	1	1	3.41	12	3.32	1	Cj0174c	putative iron-uptake ABC transporter permease	NA	1617	0	0	1	0	1	0	0	0		TTTTTAATTTATTTATTTTAAAAATAAGTTCTTTGGGTTATTCTATACCTG
170584	'+'	1	1	4.07	>100	>100	1	Cj0174c	putative iron-uptake ABC transporter permease	NA	1617	0	0	0	1	1	0	0	1		TAAAGCAGTGATTAAAGCTAAGATTATAGTTTGAAAACTGATAATATAAAA
171628	'+'	1	1	4.44	15	>100	1	Cj0174c	putative iron-uptake ABC transporter permease	NA	1617	0	0	0	1	1	0	0	1		TCATCGTAAATTTTAACCGCTTCTTTAATATTTTCTGCTATCTTACTCACA
171628	'+'	1	1	4.44	15	>100	1	Cj0175c	putative iron-uptake ABC transporter%2Cperiplasmic iron-binding protein	NA	1005	0	0	0	1	1	0	0	1		TCATCGTAAATTTTAACCGCTTCTTTAATATTTTCTGCTATCTTACTCACA
172717	'-'	1	1	258.72	>100	5.91	1	Cj0176c	putative lipoprotein	23	132	1	0	0	0	1	0	0	0		ATAAAATTATTAAGTTACTTTATATTTACTTTTTAATATTAATATTTCTTA
172963	'+'	1	1	5.17	>100	6.43	1	Cj0177	putative iron transport protein	NA	852	0	0	1	0	1	0	0	0		ATAATGAAATTTTATACTATTTTAAGCATTCTATTTATAAGCTTTATGTTG
175015	'+'	1	1	6.19	21	5.8	1	Cj0178	putative TonB-denpendent outer membrane receptor	NA	2268	0	0	1	0	1	0	0	0		TTTTTACTTATTATCTTGATAATAGTCTAAATTATGGTATCTTTACACTTG
175364	'-'	1	1	7.02	>100	10.78	1	Cj0178	putative TonB-denpendent outer membrane receptor	NA	2268	0	0	0	1	1	0	0	1		GATAAAATTGTTCATTATAAATATAATCTTTTATTTTTGTATGATAATACA
175514	'+'	1	1	2.22	>100	3.87	1	Cj0178	putative TonB-denpendent outer membrane receptor	NA	2268	0	0	1	0	1	0	0	0		AAATTCAGCTGATGATACCATATTTAAGGGTGTGGAGTTAGAATTAAGCTA
175689	'+'	1	1	3.33	4	>100	1	Cj0178	putative TonB-denpendent outer membrane receptor	NA	2268	0	0	1	0	1	0	0	0		GATTATGCAAATGTAGAGCTTGGCTTTAGGTTAAATGATAAAATAAGCTTT
175808	'-'	1	1	7.88	2.04	13.54	1	Cj0178	putative TonB-denpendent outer membrane receptor	NA	2268	0	0	0	1	1	0	0	1		TGAGGTTTTTAAACCATTCTATATTCCAATATAAATCTACTATAATAGGAA
176778	'+'	1	1	10.84	>100	9.67	2	Cj0180	biopolymer transport protein	13	411	1	0	0	0	1	0	0	0		TTATGCACCATTTAGATGAGCTTGCAAATTTTGTCTATATACTTTTTCATA
176778	'+'	1	1	10.84	>100	9.67	2	Cj0179	biopolymer transport protein	NA	762	0	0	1	0	1	0	0	0		TTATGCACCATTTAGATGAGCTTGCAAATTTTGTCTATATACTTTTTCATA
177259	'+'	1	1	96.46	>100	9.29	1	Cj0181	TonB transport protein	NA	747	0	0	1	0	1	0	0	0		TCTAGTGTGATTTTTGGGTTTGTGTTAAGTTTGATATTGCATACTTTAGTA
177984	'+'	1	1	104.66	1.83	8.79	1	Cj0182	putative transporter	11	1206	1	0	0	0	1	0	0	0		TTTAGGTAAAAAATAAACTTTTCATTAAAAAAAGTTTATTAGAATTTTTAT
178320	'+'	1	0	3.33	5.5	0.8	1	Cj0182	putative transporter	NA	1206	0	0	1	0	1	0	0	0		TATCAATAAAGGCGCATTGTATTATTATCAAAATTTATTAGAATATTTTTT
178435	'+'	1	1	12.94	3.64	2.37	1	Cj0182	putative transporter	NA	1206	0	0	1	0	1	0	0	0		GTTTTTTTGGCTATTGCTATTCCTTATGTTTTAATCGCTACAATTAATATC
178696	'+'	1	0	4.8	2.3	1.86	1	Cj0182	putative transporter	NA	1206	0	0	1	0	1	0	0	0		TTAAGTGATGTTGTGAGTAAAGCTTTATTTGCAAATTTAAGCGAAAATTCT
179270	'+'	1	1	1958.85	3.58	5.2	1	Cj0183	putative integral membrane protein	29	1359	1	0	0	0	1	0	0	0		AGAAAAAATTCAAATATTAAATTTACTTTTAATTGTGTATAATAAGGTTTA
182617	'+'	1	1	1.55	>100	>100	1	Cj0186c	putative TerC family integral membrane protein	NA	720	0	0	0	1	1	0	0	1		GTTACAAGTTTCATCACCCAAAAAAGAGATAAAAGAAGTAAAATTCTTGTA
182820	'-'	1	1	26.98	8.3	5.23	1	Cj0186c	putative TerC family integral membrane protein	33	720	1	0	0	0	1	0	0	0		ATTTTTTCTTAAAGAATTAAAGGTATTTGCTTTAAAACTATAAAATATCGC
182982	'+'	1	1	20.13	14	8.93	1	Cj0187c	phosphoribosylglycinamide formyltransferase	NA	567	0	0	0	1	1	0	0	1		TCAAAACTCAAATTTCTTTTTTCAAAAGCTTTTTGAGCTATAATCATTCCA
183195	'-'	1	1	63.2	>100	3.25	1	Cj0187c	phosphoribosylglycinamide formyltransferase	NA	567	0	0	1	0	1	0	0	0		ATTGATCATAAGGCTTATAATACTCGTGAAGAATTTGATACAATTTTAGTA
183609	'-'	1	1	4.07	6.5	12.43	2	Cj0187c	phosphoribosylglycinamide formyltransferase	184	567	1	0	0	0	1	0	0	0		AAATCCTATTATTGTGCAAAAAGAAAAATTATTTGTTGTAAATTTAGGAAA
183609	'-'	1	1	4.07	6.5	12.43	2	Cj0188c	putative kinase	NA	1371	0	0	1	0	1	0	0	0		AAATCCTATTATTGTGCAAAAAGAAAAATTATTTGTTGTAAATTTAGGAAA
184078	'-'	1	1	2.79	1.63	2.34	1	Cj0188c	putative kinase	NA	1371	0	0	1	0	1	0	0	0		TAGATAGAAAAATCAACGCCAATAAAGGAAATTTTGGCCATATTTATATAG
184425	'-'	1	0	4.8	7.5	1.17	1	Cj0188c	putative kinase	NA	1371	0	0	1	0	1	0	0	0		ATTTTGTAAAAAAGAACCCAATTTTAAAAAATTTCATATTATCATTGATTG
185589	'-'	1	1	36.22	2.24	5.58	2	Cj0189c	hypothetical protein	121	699	0	1	0	0	1	0	0	0		AAAAAGATGCCAAAGATACGCTAGATTTAGCAATTTCACGTTATAATCTTT
185589	'-'	1	1	36.22	2.24	5.58	2	Cj0190c	hypothetical protein	NA	1506	0	0	1	0	1	0	0	0		AAAAAGATGCCAAAGATACGCTAGATTTAGCAATTTCACGTTATAATCTTT
186580	'+'	1	1	22.55	>100	8.98	1	Cj0190c	hypothetical protein	NA	1506	0	0	0	1	1	0	0	1		TAAACCTCTAAATTTGGTATCATGGAAGCTTTTTGTGCTATACTTTTTGGA
187673	'+'	1	1	3.72	>100	3.32	1	Cj0192c	ATP-dependent Clp protease proteolytic subunit	NA	585	0	0	0	1	1	0	0	1		TTTGCTATTTTTGCAACTTTTTGCTTAGTATTTTTTGCCAAAATATCATTA
187873	'-'	1	1	63.94	3.37	2.56	1	Cj0192c	ATP-dependent Clp protease proteolytic subunit	NA	585	0	0	1	0	1	0	0	0		CAGGTGGTGTAATTACAAGTGGTTTTAGTATTTATGATACTATGAACTATA
189481	'-'	1	1	86.48	59.5	2.56	1	Cj0193c	trigger factor	28	1335	1	0	0	0	1	0	0	0		TACTTTAAAATTTTATGCAAGTAATAAGGAAAAATTTGCTATCATTGAAGG
189552	'+'	1	1	873.35	20.06	6.56	2	Cj0194	GTP cyclohydrolase I	44	573	1	0	0	0	1	0	0	1		TCCTTATTACTTGCATAAAATTTTAAAGTAATTTATGATAAAATTGCAATA
189552	'+'	1	1	873.35	20.06	6.56	2	Cj0193c	trigger factor	NA	1335	0	0	0	1	1	0	0	1		TCCTTATTACTTGCATAAAATTTTAAAGTAATTTATGATAAAATTGCAATA
191237	'-'	1	1	34.74	5.95	16.03	1	Cj0195	flagellum-specific ATP synthase	NA	1386	0	0	0	1	1	0	0	1		GCTTAAATTTTCTTGCCCAAAGTTTATGTTCAGGACTTATAATGTCACTCA
193327	'-'	1	0	4.8	7.5	0.86	1	Cj0197c	dihydrodipicolinate reductase	NA	729	0	0	1	0	1	0	0	0		ATTTTACATTTGATGCAAAGTGCTAGTGAAGTGATGCCGATTTTTTATGCG
193645	'-'	1	1	447.21	2.78	9.52	1	Cj0197c	dihydrodipicolinate reductase	22	729	1	0	0	0	1	0	0	0		TAAAGCTTAATTTTATTATTTAAAATTTACAAAATAAATGCTAAAATCAAT
195235	'+'	1	1	4.44	2.67	13.05	1	Cj0199c	putative periplasmic protein	NA	1122	0	0	0	1	1	0	0	1		AAAAAATTTGTTTATGGTTATATTAAATTTTGTTTTGTCAAAATTCAAATT
196010	'-'	1	1	35.11	2.98	3.96	1	Cj0199c	putative periplasmic protein	22	1122	1	0	0	0	1	0	0	0		AAATAAAAATTTAAACTCTTTTTTAACAAGCAATTTATAAAATAACACTTA
196494	'-'	1	1	1302.82	>100	7.4	1	Cj0200c	putative periplasmic protein	24	348	1	0	0	0	1	0	0	0		AAAATTTTTAATTTCACATTCACTTCACTTAAAAATTTTATAATGTCATCA
197542	'-'	1	1	76.51	13.94	5.75	1	Cj0202c	hypothetical protein	78	342	1	0	0	0	1	0	0	0		TATAAACAAGAATAAAAAAATAATTTTGAATTATTTTGCTATAATTATGAA
197601	'+'	1	1	19.96	>100	6.81	1	Cj0203	putative citrate transporter	106	1347	1	0	0	0	1	0	0	0		ATAGCAAAATAATTCAAAATTATTTTTTTATTCTTGTTTATAATGGTTACA
198140	'-'	1	1	3.7	>100	>100	1	Cj0203	putative citrate transporter	NA	1347	0	0	0	1	1	0	0	1		TTGAAGTCTTTCTTATACCTAAACGCTCATAAATAGGTAATAATGCAGGTA
198298	'-'	1	1	6.65	19	19.06	1	Cj0203	putative citrate transporter	NA	1347	0	0	0	1	1	0	0	1		CAAAAGAAGGGATAATACCAAACCTACAATCTGAATAGGTATAATATGGTG
198963	'-'	1	1	6.28	4.5	27.23	1	Cj0203	putative citrate transporter	NA	1347	0	0	0	1	1	0	0	1		ATACTTATACCCCATATATAAAAAAAGCTTCTTTTGATATGATCTTTAATA
199158	'+'	1	1	24.39	2.14	6.17	1	Cj0204	putative oligopeptide transporter%2C OPT family	78	1998	1	0	0	0	1	0	0	0		TTTTGAGTCAAAAATTTATAAAAATATAAGCGTTTTTTTGTATTATTTTAT
201047	'+'	1	0	8.13	2.69	0.69	2	Cj0205	undecaprenyl-diphosphatase	260	804	0	1	0	0	1	0	0	0		AAACTTGCAAGTTGTGAGCAAAGAGGCACGCTTTTTGCTTCAGGGCTTATA
201047	'+'	1	0	8.13	2.69	0.69	2	Cj0204	putative oligopeptide transporter%2C OPT family	NA	1998	0	0	1	0	1	0	0	0		AAACTTGCAAGTTGTGAGCAAAGAGGCACGCTTTTTGCTTCAGGGCTTATA
202032	'-'	1	1	8.05	3.89	5.27	1	Cj0205	undecaprenyl-diphosphatase	NA	804	0	0	0	1	1	0	0	1		AAAATCCCACTATAATACAAATAAAAGAAAACAAATCCTAAAATAATACGA
202196	'+'	1	1	752.12	19.67	5.89	1	Cj0206	threonyl-tRNA synthetase	45	1809	1	0	0	0	1	0	0	0		ATAAGCTGAATTTCAAAAATAATTAAGTCTTAGAAAGTTAAAATTAGAACT
204145	'+'	1	1	27.72	6.36	2.89	1	Cj0207	translation initiation factor IF-3	NA	519	0	0	1	0	1	0	0	0		AAATCAGATGTGTTGGCGATGATGGCAAAGTTTATGGTATTATCAGTAGTG
205353	'-'	1	1	7.39	21	5.96	1	Cj0208	putative DNA modification methylase	NA	1092	0	0	0	1	1	0	0	1		TTCTTCAGGTTTTTTATAATTTGCAATTAAATTTAGCATAAAATAATTAGA
205718	'+'	1	1	31.59	5.64	3.32	1	orphan	orphan	NA	NA	0	0	0	0	1	0	0	0		CAACTTTATATTTTAGTTAAAAATTAGTTTTTCGTGCTAAAATTGCACTTA
205880	'-'	1	1	7.76	5.2	16.58	1	orphan	orphan	NA	NA	0	0	0	0	1	0	0	0		GGCACATTAAAAGAGATATTTTGACTAGGATTTTTTGCTAAAATTTAAAAG
206879	'+'	1	1	11.09	>100	2.86	1	Cj0223	pseudo	NA	3133	0	0	1	0	1	0	0	0		AATGTGGGTTATGTAAGCTATAAAAATTCTTTTGATGATAAAATAATTGTG
207081	'+'	1	1	15.52	7	8.59	1	Cj0223	pseudo	NA	3133	0	0	1	0	1	0	0	0		CATGGCGGAATTTATGCTGATAAGGGTTCAAGGTAGAATATAATGTTAAAA
207951	'+'	1	1	15.15	42	4.35	1	Cj0223	pseudo	NA	3133	0	0	1	0	1	0	0	0		ATTCTGATGTTACTTTGCAAAACACATTTTTTAGTGGTAATATCAAAGGTA
208840	'+'	1	1	24.39	36	5.97	1	Cj0223	pseudo	NA	3133	0	0	1	0	1	0	0	0		GGTTATAGAAAAGCTTATGATAAATTTTATCTTGAGCCGATTTGGAATTTA
209233	'+'	1	1	8.87	7.78	10.71	1	Cj0224	N-acetyl-gamma-glutamyl-phosphate reductase	46	1029	0	1	0	0	1	0	0	0		AAGATATAGTTTTTAAATAAAAAATAATTTAAAAATTGTATTTTTATTTTA
209258	'+'	1	1	1097.69	3.86	6.3	1	Cj0224	N-acetyl-gamma-glutamyl-phosphate reductase	21	1029	1	0	0	0	1	0	0	0		AATTTAAAAATTGTATTTTTATTTTAAGCTTTTTTGTTTATAATACTTGCT
209526	'+'	1	1	4.44	13	2.46	1	Cj0224	N-acetyl-gamma-glutamyl-phosphate reductase	NA	1029	0	0	1	0	1	0	0	0		TGATCTTTTGTTTTTGGCTACTCCGCATAAATTTAGTGCTAAACTTTTAAA
210749	'+'	1	0	4.8	>100	0.95	2	Cj0226	acetylglutamate kinase	18	846	1	0	0	0	1	0	0	0		GAGAGGATGCGAATTATTACGATCTTTCTTTAAATGAGTATAATCAAACTA
210749	'+'	1	0	4.8	>100	0.95	2	Cj0225	putative acetyltransferase	NA	447	0	0	1	0	1	0	0	0		GAGAGGATGCGAATTATTACGATCTTTCTTTAAATGAGTATAATCAAACTA
211456	'+'	1	0	6.28	9.5	1.03	2	Cj0227	putative acetylornithine%2Fsuccinyldiaminopimelate aminotransferase	160	1188	1	0	0	0	1	0	0	0		AAAAATTCTTTAATTTCTAAAATCAGCCTTGAACAGGCTAAAATTTTAGCT
211456	'+'	1	0	6.28	9.5	1.03	2	Cj0226	acetylglutamate kinase	NA	846	0	0	1	0	1	0	0	0		AAAAATTCTTTAATTTCTAAAATCAGCCTTGAACAGGCTAAAATTTTAGCT
211853	'+'	1	1	23.65	4.76	3.22	1	Cj0227	putative acetylornithine%2Fsuccinyldiaminopimelate aminotransferase	NA	1188	0	0	1	0	1	0	0	0		CGCAAGTGGATAAGCTTTTGCATACTAGCAATTTATATTATAATGAAAATA
212827	'+'	1	1	8.13	23	2.9	1	Cj0228c	protein-L-isoaspartate O-methyltransferase	NA	630	0	0	0	1	1	0	0	1		TTAAGAAAGGCTCTAAAGAGTTTTTAATAAATTTTGTAAAAAAATTTATTC
213471	'-'	1	1	46.57	1.91	4.57	2	Cj0228c	protein-L-isoaspartate O-methyltransferase	20	630	1	0	0	0	1	0	0	1		AGTATAGCTAAGTTTAACTCTATTTCAACTTTTTTAGTTACAATTTTTATT
213471	'-'	1	1	46.57	1.91	4.57	2	Cj0229	putative acetyltransferase	NA	549	0	0	0	1	1	0	0	1		AGTATAGCTAAGTTTAACTCTATTTCAACTTTTTTAGTTACAATTTTTATT
213478	'-'	1	1	12.94	7.75	3.33	2	Cj0228c	protein-L-isoaspartate O-methyltransferase	27	630	0	1	0	0	1	0	0	1		TTATTTAAGTATAGCTAAGTTTAACTCTATTTCAACTTTTTTAGTTACAAT
213478	'-'	1	1	12.94	7.75	3.33	2	Cj0229	putative acetyltransferase	NA	549	0	0	0	1	1	0	0	1		TTATTTAAGTATAGCTAAGTTTAACTCTATTTCAACTTTTTTAGTTACAAT
214774	'+'	1	1	17.37	>100	4.97	1	Cj0230c	nicotinate phosphoribosyltransferase	NA	1374	0	0	0	1	1	0	0	1		CAATCATAAGTATCAATCAAAAAAACAGGATTTTTTGGATAAATTTTCACA
216733	'+'	1	1	3.72	13	21.55	1	Cj0232c	putative integral membrane protein	NA	411	0	0	0	1	1	0	0	1		CTTGAATCAAACCAAATAAAAAAGTACATAAAGTTGTGATAAAATGGTTGT
217553	'-'	1	1	184.06	36.57	4.27	2	Cj0233c	orotate phosphoribosyltransferase	81	609	1	0	0	0	1	0	0	0		AAAGATAAGGCAATAAGCGAAGATGAAGCAAAAAAAGCTTATGATGAAGTG
217553	'-'	1	1	184.06	36.57	4.27	2	Cj0234c	ribosome recycling factor	NA	564	0	0	1	0	1	0	0	0		AAAGATAAGGCAATAAGCGAAGATGAAGCAAAAAAAGCTTATGATGAAGTG
218446	'-'	1	1	769.86	2.14	8.94	1	Cj0235c	preprotein translocase subunit SecG	27	372	1	0	0	0	1	0	0	0		ACTTTTCAAGTTTCAAAACTTTTCAAGTTTTATTTAGCTAAAATAATCATT
219258	'-'	1	1	473.82	49.31	5.67	1	Cj0236c	putative integral membrane protein	40	696	1	0	0	0	1	0	0	0		ATATTATATAAATTAACTTTTTATTTAGTCTAATATGTTAGATTTCGCTCA
219312	'+'	1	1	6.28	>100	9.64	2	Cj0237	carbonic anyhydrase	66	636	0	1	0	0	1	0	0	1		CGAAATCTAACATATTAGACTAAATAAAAAGTTAATTTATATAATATCTTA
219312	'+'	1	1	6.28	>100	9.64	2	Cj0236c	putative integral membrane protein	NA	696	0	0	0	1	1	0	0	1		CGAAATCTAACATATTAGACTAAATAAAAAGTTAATTTATATAATATCTTA
219355	'+'	1	1	212.89	33	6.95	1	Cj0237	carbonic anyhydrase	23	636	1	0	0	0	1	0	0	0		ATATCTTATGCTTAAATGAAATCTTTGCTGAAATTTTGTTATAATTTCAAG
220832	'+'	1	1	21.81	>100	3.62	1	Cj0238	putative mechanosensitive ion channel family protein	NA	1884	0	0	1	0	1	0	0	0		TTTTTATATCTTTAAGACGTTTTTTTGCAAATATAGTATATTTTTTCCTTG
221608	'-'	1	1	42.13	8.6	8.13	1	Cj0238	putative mechanosensitive ion channel family protein	NA	1884	0	0	0	1	1	0	0	1		TAGCCTTCTAAATCATTAATAGATACAAGATTTTGACGATATTTTGTTGTA
222252	'+'	1	1	2.59	>100	5.8	1	Cj0239c	NifU protein	NA	972	0	0	0	1	1	0	0	1		TTGAGTTTTTCTCTATCTATTTCAGCTCTAGTTTCAGCTAAAATATCTACA
222668	'-'	1	1	155.23	13.58	6.73	1	Cj0239c	NifU protein	NA	972	0	0	1	0	1	0	0	0		CAGTAAGACTTTTTTGGCTTGTAGATGAAAAAACTGATAAAATTATCGATG
224445	'+'	1	1	6.19	2.82	6.42	1	Cj0241c	putative iron-binding protein	NA	402	0	0	0	1	1	0	0	1		TCTTCAATTTCTAAGATAATTTTTCTGTGAATTCTTGTATGATGGTTGATA
225169	'+'	1	1	10.53	>100	39.79	1	Cj0243c	hypothetical protein	NA	1167	0	0	0	1	1	0	0	1		AGATCAAAACTCATCTTTTTTTCATTTTCTTTTTTGATGTAATCTTCTATA
225984	'-'	1	1	12.54	>100	8.29	1	Cj0243c	hypothetical protein	24	1167	0	1	0	0	1	0	0	0		CTGAATTTAATTTTTAAAAAACTTGGCACACCTTTTGCTTATAAAAAATCA
226062	'+'	1	1	7.39	11.5	17.59	1	Cj0244	50S ribosomal protein L35	54	192	0	1	0	0	1	0	0	0		AGTTTTTTAAAAATTAAATTCAGTCAAAAATTAGAAAAAATTTGATAGTAT
226068	'+'	1	1	363.06	25.91	9.74	1	Cj0244	50S ribosomal protein L35	48	192	1	0	0	0	1	0	0	0		TTAAAAATTAAATTCAGTCAAAAATTAGAAAAAATTTGATAGTATTTAGCT
226673	'-'	1	1	12.2	34	12.86	1	Cj0245	50S ribosomal protein L20	NA	354	0	0	0	1	1	0	0	1		TTTGCAAAAGCAGCAGCATCATTCATAGCTAAATCTGCTAGAATTTTTCTA
228028	'-'	1	1	5.91	17	3.73	2	Cj0246c	putative MCP-domain signal transduction protein	94	1128	1	0	0	0	1	0	0	0		TAATCCTCAAAGCAATATCACCTTTACCATACTTGATGTAAGCTTATATGA
228028	'-'	1	1	5.91	17	3.73	2	Cj0247c	hypothetical protein	NA	534	0	0	1	0	1	0	0	0		TAATCCTCAAAGCAATATCACCTTTACCATACTTGATGTAAGCTTATATGA
228179	'+'	1	1	5.17	15	7.18	1	Cj0247c	hypothetical protein	NA	534	0	0	0	1	1	0	0	1		ATGTATGCTTAAAGCTTGATTTTTTAATATTTCTCCATTATAAAATATAAA
228397	'+'	1	1	6.65	>100	>100	1	Cj0247c	hypothetical protein	NA	534	0	0	0	1	1	0	0	1		TAAATAAAACTTCTTTTTCTATCAGTTTTTTTCTTTCTGTATAATCTTTTA
228904	'-'	1	1	8.13	2	8.51	1	Cj0248	hypothetical protein	NA	858	0	0	0	1	1	0	0	1		TCCAATCATATTTAATTTATCCTTAATTAATATTATTATAATTTGCAATTA
228913	'+'	1	1	2097.07	12.41	7.6	1	Cj0248	hypothetical protein	33	858	1	0	0	0	1	0	0	0		TAAGTCATAAAAAATGCAATAAGTAAATTAAAATTTAGATATAATTGCAAA
229873	'-'	1	1	11.09	>100	8.29	1	Cj0248	hypothetical protein	NA	858	0	0	0	1	1	0	0	1		ATTTTTTGAAATTCCAGCAAAACGATGAAATTCAGCGTTTAAAATATAGTG
229873	'-'	1	1	11.09	>100	8.29	1	Cj0249	hypothetical protein	NA	480	0	0	0	1	1	0	0	1		ATTTTTTGAAATTCCAGCAAAACGATGAAATTCAGCGTTTAAAATATAGTG
230435	'+'	1	1	36.54	>100	97.81	1	Cj0250c	putative MFS transport protein	NA	1311	0	0	0	1	1	0	0	1		CAAAAATTACTTAAATTATTTAAGGCAAAACTATGCAAGAAAAAAGCAAGT
231771	'-'	1	1	92.77	1.95	10.83	2	Cj0251c	highly acidic protein	24	156	1	0	0	0	1	0	0	1		ATTATAAAAATTATAGCAAAACCAAACAAATTTAAGATAAAATAAGCTTTG
231771	'-'	1	1	92.77	1.95	10.83	2	Cj0252	molybdenum cofactor biosynthesis protein MoaC	NA	474	0	0	0	1	1	0	0	1		ATTATAAAAATTATAGCAAAACCAAACAAATTTAAGATAAAATAAGCTTTG
231819	'+'	1	1	155.6	25.76	4.31	2	Cj0252	molybdenum cofactor biosynthesis protein MoaC	21	474	1	0	0	0	1	0	0	1		TACAAAGCTTATTTTATCTTAAATTTGTTTGGTTTTGCTATAATTTTTATA
231819	'+'	1	1	155.6	25.76	4.31	2	Cj0251c	highly acidic protein	NA	156	0	0	0	1	1	0	0	1		TACAAAGCTTATTTTATCTTAAATTTGTTTGGTTTTGCTATAATTTTTATA
232232	'+'	1	0	5.54	1.94	0.76	2	Cj0253	hypothetical protein	59	264	0	1	0	0	1	0	0	0		TTAAGTGGAGTTAGTATAGGACTTTTAACTATATATGATATGATCAAGGCT
232232	'+'	1	0	5.54	1.94	0.76	2	Cj0252	molybdenum cofactor biosynthesis protein MoaC	NA	474	0	0	1	0	1	0	0	0		TTAAGTGGAGTTAGTATAGGACTTTTAACTATATATGATATGATCAAGGCT
232533	'+'	1	0	5.54	8.5	1.84	2	Cj0254	hypothetical protein	11	1161	1	0	0	0	1	0	0	0		TATGTTGATAGCAAAAAAGATCGTTTGGATATATTTGATAAATTAAAAGCT
232533	'+'	1	0	5.54	8.5	1.84	2	Cj0253	hypothetical protein	NA	264	0	0	1	0	1	0	0	0		TATGTTGATAGCAAAAAAGATCGTTTGGATATATTTGATAAATTAAAAGCT
233178	'+'	1	0	13.67	6.29	1.9	1	Cj0254	hypothetical protein	NA	1161	0	0	1	0	1	0	0	0		AGCTCATTTTGAAAAAGAAAGAATTTTAAAAATTTCAAGTATTATTTTAAA
233790	'-'	1	1	3.7	6	2.15	2	Cj0255c	exodeoxyribonuclease	NA	759	0	0	1	0	1	0	0	1		GAGGATTGATTATTTTTTCATTTCAAAGGGTTTAAAAGATAAACTTAAAAA
233790	'-'	1	1	3.7	6	2.15	2	Cj0254	hypothetical protein	NA	1161	0	0	0	1	1	0	0	1		GAGGATTGATTATTTTTTCATTTCAAAGGGTTTAAAAGATAAACTTAAAAA
234509	'-'	1	1	35.11	1.89	12.2	2	Cj0255c	exodeoxyribonuclease	28	759	1	0	0	0	1	0	0	1		AATTTTTTTAAATGGATTGTAGTTTTAAATCTTTTTATGTTATGATTTACA
234509	'-'	1	1	35.11	1.89	12.2	2	Cj0256	putative sulfatase family protein	NA	1539	0	0	0	1	1	0	0	1		AATTTTTTTAAATGGATTGTAGTTTTAAATCTTTTTATGTTATGATTTACA
234514	'-'	1	1	7.76	>100	23.82	2	Cj0255c	exodeoxyribonuclease	33	759	0	1	0	0	1	0	0	1		TATTGAATTTTTTTAAATGGATTGTAGTTTTAAATCTTTTTATGTTATGAT
234514	'-'	1	1	7.76	>100	23.82	2	Cj0256	putative sulfatase family protein	NA	1539	0	0	0	1	1	0	0	1		TATTGAATTTTTTTAAATGGATTGTAGTTTTAAATCTTTTTATGTTATGAT
234574	'+'	1	1	6399.89	>100	12.8	2	Cj0256	putative sulfatase family protein	25	1539	1	0	0	0	1	0	0	1		AAAAAGATTTAAAACTACAATCCATTTAAAAAAATTCAATAAAATTAAAAG
234574	'+'	1	1	6399.89	>100	12.8	2	Cj0255c	exodeoxyribonuclease	NA	759	0	0	0	1	1	0	0	1		AAAAAGATTTAAAACTACAATCCATTTAAAAAAATTCAATAAAATTAAAAG
234803	'-'	1	1	5.91	2.23	6.63	1	Cj0256	putative sulfatase family protein	NA	1539	0	0	0	1	1	0	0	1		CCCATAAAAACTAATAAAGTAAACACTTAAAAAAGATGATATTATAAATAA
235315	'-'	1	1	15.52	15	5.71	1	Cj0256	putative sulfatase family protein	NA	1539	0	0	0	1	1	0	0	1		AAAAAGACTACATTATCTTTTTTGGTATAAAAATTGGTATCATTTTTAGTA
236485	'+'	1	1	4.44	4	2.11	2	Cj0258	ArsR family regulatory protein	2	246	1	0	0	0	1	0	0	0		GTGTGCTTTTAGCTCTTTTTGTTTGGGGCTTTATTTTATATAATATTTACT
236485	'+'	1	1	4.44	4	2.11	2	Cj0257	diacylglycerol kinase	NA	357	0	0	1	0	1	0	0	0		GTGTGCTTTTAGCTCTTTTTGTTTGGGGCTTTATTTTATATAATATTTACT
237207	'-'	1	1	3.1	>100	4.14	1	Cj0259	dihydroorotase	NA	1008	0	0	0	1	1	0	0	1		TCATAATCTTTTAAAAGTTCACATAAAGTTTTAGTGGTAATATGCTCCATA
237624	'+'	1	0	3.33	10	1.4	1	Cj0259	dihydroorotase	NA	1008	0	0	1	0	1	0	0	0		AATACTTGTAAAATTTATGATTTAAAATTTAAAGAAGATAAAATTTTAACT
237682	'+'	1	1	12.39	3.35	3.15	2	Cj0259	dihydroorotase	NA	1008	0	0	1	0	1	0	0	1		AAAAAGAATGGCAAGTACCAAATGTTTATGAAGATAAATACAATCAAGTCG
237682	'+'	1	1	12.39	3.35	3.15	2	Cj0260c	hypothetical protein	NA	216	0	0	0	1	1	0	0	1		AAAAAGAATGGCAAGTACCAAATGTTTATGAAGATAAATACAATCAAGTCG
237792	'-'	1	1	137.49	34.82	7.24	2	Cj0260c	hypothetical protein	NA	216	0	0	1	0	1	0	0	1		GATAGTCAGTTTTATTGCTTTATTTTTAAGTTTTTTTTGTAATCTATCTTG
237792	'-'	1	1	137.49	34.82	7.24	2	Cj0259	dihydroorotase	NA	1008	0	0	0	1	1	0	0	1		GATAGTCAGTTTTATTGCTTTATTTTTAAGTTTTTTTTGTAATCTATCTTG
237997	'-'	1	1	421.34	3.75	3.98	1	Cj0260c	hypothetical protein	21	216	1	0	0	0	1	0	0	0		TATAAATAACTTATAAAAATATTAAGCTTATATTGATTACAATTTCACTCA
238772	'-'	1	1	337.81	5.97	7.33	1	Cj0261c	putative SAM-dependent methyltransferase	21	720	1	0	0	0	1	0	0	0		CAAGCCCTTTCTTTGGGCTTGAATTTTAAAAATTTATGCTATGATTTTATA
240868	'-'	1	1	182.58	5.12	6.33	1	Cj0262c	putative methyl-accepting chemotaxis signal transduction protein	39	1998	1	0	0	0	1	0	0	0		AAAAAAGTTCATTTTTTATACACTTTTTCTCTTATTTTTTGCTAGAATAAT
241004	'+'	1	1	55.81	5.4	9.32	1	Cj0263	zinc transporter ZupT	18	876	1	0	0	0	1	0	0	0		ATTTTTATCAAGTATTAACTTTTTATAAATATAAAGAGTTTTAAAATATTA
242190	'-'	1	1	7.76	4.33	3.18	1	Cj0264c	molybdopterin containing oxidoreductase	NA	2517	0	0	1	0	1	0	0	0		ATTCTAAAGATGCAAAAAAACTTGGTATAAAAAATGGCGATGTAGTGCGTG
243384	'-'	1	1	6.65	7	3.4	1	Cj0264c	molybdopterin containing oxidoreductase	NA	2517	0	0	1	0	1	0	0	0		TCGATGAAAAAACTATCAAAAATTTAGCTGAAACTTTTTATGATAATTCTA
245051	'-'	1	1	398.42	25.25	3.7	1	Cj0265c	putative cytochrome C-type haem-binding periplasmic protein	28	576	1	0	0	0	1	0	0	0		AAATTATACAATTAAGTAATAATTAAATTGCATAGTATTAAAATACATTTA
245380	'-'	1	1	684.67	2.56	3.55	1	CjNC10	CjNC10	0	156	1	0	0	0	1	0	0	0		ATTATATAAATATTAATAATAATTTAAGTTTTATTAATATAATATTTATTA
245537	'+'	1	1	22.91	>100	5.41	1	Cj0266c	putative integral membrane protein	NA	510	0	0	0	1	1	0	0	1		CTAGTTGATTTCTTGAATCAAATACATTTTAAGGTGTGATAAAATTCAGGA
245810	'-'	1	1	3.7	6	2.07	1	Cj0266c	putative integral membrane protein	NA	510	0	0	1	0	1	0	0	0		TCTATTTTTCTAACAATCAATCAATTCACCACTCAAGCCGATCTTAGCAAA
246633	'-'	1	1	69.48	48	2.69	2	Cj0267c	putative integral membrane protein	90	531	1	0	0	0	1	0	0	0		AAAGAATTTAATGAAGCTTTAAAAGTCAATCAAGATGCTAAAATTTTCTTA
246633	'-'	1	1	69.48	48	2.69	2	Cj0268c	putative transmembrane protein	NA	1089	0	0	1	0	1	0	0	0		AAAGAATTTAATGAAGCTTTAAAAGTCAATCAAGATGCTAAAATTTTCTTA
246758	'+'	1	1	29.2	40.5	6.53	1	Cj0268c	putative transmembrane protein	NA	1089	0	0	0	1	1	0	0	1		TAGCAAAGGGGTGTTTAGGCTGTTTGCGATTTCTTTGTTAGAATAAGCTTG
247080	'-'	1	1	69.67	23.5	3	1	Cj0268c	putative transmembrane protein	NA	1089	0	0	1	0	1	0	0	0		ATTATCGATCCAGTTGTTCGTGATGTAGTGCGAAGTGTTGTAGGAAAATAC
248625	'-'	1	1	30.31	2.64	4.68	1	Cj0269c	branched-chain amino acid aminotransferase	55	915	1	0	0	0	1	0	0	0		AGCTTAATTTAATAAAAGCTTATTATTAGTATATTTTTGATAAAATCCCGA
249579	'+'	1	1	13.31	4.6	7.46	1	Cj0272	hypothetical protein	NA	1092	0	0	1	0	1	0	0	0		ACGAACTAAGATTTTTAGATGTAAAAAGATCTTGTGATAAACTTGGTATTA
250555	'+'	1	1	17.37	48	4.14	1	Cj0273	%283R%29-hydroxymyristoyl-ACP dehydratase	35	441	0	1	0	0	1	0	0	0		TTAAGAAAAACTTTTTTGTTAATATAATTTTTAATGATTTTTTTATATAAT
250560	'+'	1	1	1653.93	64.93	9.58	1	Cj0273	%283R%29-hydroxymyristoyl-ACP dehydratase	30	441	1	0	0	0	1	0	0	0		AAAAACTTTTTTGTTAATATAATTTTTAATGATTTTTTTATATAATAAAAT
251413	'-'	1	1	2.22	7	>100	1	Cj0274	UDP-N-acetylglucosamine acyltransferase	NA	792	0	0	0	1	1	0	0	1		CCAAGCTCTACATGTCCTGCTAAAGTTGCATTATTAGCTAAAATAATATTA
254211	'+'	1	1	6.65	7	2.16	1	Cj0277	rod shape-determining protein MreC	NA	750	0	0	1	0	1	0	0	0		ATGTTCTCCGTGTTAATGATTTTGTTATAGGTAATTTTTATAATATTAAAG
255065	'+'	1	0	82.21	54.1	1.35	1	Cj0279	carbamoyl phosphate synthase large subunit	24	3270	1	0	0	0	1	0	0	0		ATATCGATAATTTCAAAGTTTATAAAACTAATTTTTGTTATAATCAGCCCA
256132	'-'	1	1	19.82	>100	4.83	1	Cj0279	carbamoyl phosphate synthase large subunit	NA	3270	0	0	0	1	1	0	0	1		CCTGGAAATTTTTCAAAGGTAAAGCGAGGAATTTTTGTTACAATATAATCA
256898	'+'	1	1	36.59	9.25	4.12	1	Cj0279	carbamoyl phosphate synthase large subunit	NA	3270	0	0	1	0	1	0	0	0		CTTTTGCGCTTAAAGATATGGGTATTAAAACTATTATGTATAATTGTAATC
258481	'-'	1	1	5.17	15	12.43	1	Cj0280	hypothetical protein	NA	423	0	0	0	1	1	0	0	1		ACGACGTACTAAATTTTTAAAAGATTTTGGAATTCTTGCTAAACTTTTTAA
258753	'-'	1	1	18.58	3.42	4.33	1	Cj0280	hypothetical protein	NA	423	0	0	0	1	1	0	0	1		TTGAAGATATTTTAAAAGCTCTTTAATTAACGTATTTTTATCATTTTATTC
259015	'+'	1	1	7.12	2.53	10.5	1	Cj0281c	transaldolase	NA	978	0	0	0	1	1	0	0	1		GGAGCAGTATTAACAGAATTCTCAAAAAGAAGTTCTTTGATATAATAGTCT
259581	'+'	1	1	665.27	2.57	7.63	1	Cj0281c	transaldolase	NA	978	0	0	0	1	1	0	0	1		TGCTTTTTGAATATCAGAAATTGCTAATTCTTCATAAATATCTTTTGTTTT
263081	'-'	1	0	8.5	1.8	1.51	1	Cj0284c	chemotaxis histidine kinase	NA	2310	0	0	1	0	1	0	0	0		AGCTTGAATCAAATCCAGAAGATTTAGAATTATTAAATAGAATTTTCCGTG
263160	'+'	1	1	3.7	>100	>100	1	Cj0284c	chemotaxis histidine kinase	NA	2310	0	0	0	1	1	0	0	1		TCTTCTGGATTTGATTCAAGCTCTACTAAATCATGGTCGATTTGCTCAACA
263160	'+'	1	1	3.7	>100	>100	1	Cj0285c	chemotaxis protein	NA	957	0	0	0	1	1	0	0	1		TCTTCTGGATTTGATTCAAGCTCTACTAAATCATGGTCGATTTGCTCAACA
264212	'-'	1	1	1294.38	>100	2.3	2	Cj0285c	chemotaxis protein	39	957	1	0	0	0	1	0	0	0		CTTAGCTAGTTTTGCATATGAGAGAAGTTTTTTTGTAGTAGAATATCAGCA
264212	'-'	1	1	1294.38	>100	2.3	2	Cj0286c	hypothetical protein	NA	618	0	0	1	0	1	0	0	0		CTTAGCTAGTTTTGCATATGAGAGAAGTTTTTTTGTAGTAGAATATCAGCA
264930	'+'	1	1	9.24	>100	14.18	1	Cj0287c	transcription elongation factor GreA	NA	486	0	0	0	1	1	0	0	1		TTCATGAGCATCTGCGATTAAAATCGCTCCATTTTGTAGTAAAATTTTTTA
265497	'-'	1	1	364.79	2.13	8.31	2	Cj0287c	transcription elongation factor GreA	78	486	1	0	0	0	1	0	0	0		TATGAAGCTTACAATAAATATGATTATAAGGCATTTTTTGCTAAAGTTGAT
265497	'-'	1	1	364.79	2.13	8.31	2	Cj0288c	ipid-A-disaccharide synthase	NA	1095	0	0	1	0	1	0	0	0		TATGAAGCTTACAATAAATATGATTATAAGGCATTTTTTGCTAAAGTTGAT
265517	'-'	1	1	7.76	20	2.37	2	Cj0287c	transcription elongation factor GreA	98	486	0	1	0	0	1	0	0	0		AAGTCAATGTTTTAAATTTATATGAAGCTTACAATAAATATGATTATAAGG
265517	'-'	1	1	7.76	20	2.37	2	Cj0288c	ipid-A-disaccharide synthase	NA	1095	0	0	1	0	1	0	0	0		AAGTCAATGTTTTAAATTTATATGAAGCTTACAATAAATATGATTATAAGG
266109	'+'	1	1	4.07	>100	7.94	1	Cj0288c	ipid-A-disaccharide synthase	NA	1095	0	0	0	1	1	0	0	1		TTGTTAAAAAATTGATTATCAAAGGGCAAAATAGAAGCTAAAATATCAAAA
266548	'-'	1	1	83.9	5.91	2.35	1	Cj0288c	ipid-A-disaccharide synthase	23	1095	0	1	0	0	1	0	0	0		TGTATTCTTGCATAACTTCTTTTAATTAAGCCAAAATAAGATAAAATGTTT
267262	'+'	1	1	7.39	>100	22.69	1	Cj0289c	major antigenic peptide PEB3	NA	753	0	0	0	1	1	0	0	1		GGCCAAAATTTACATTTACTTTAACGCCTGTTTTTTCGCTATATTTGTTTG
267410	'-'	1	1	234.32	58.64	4.75	1	Cj0289c	major antigenic peptide PEB3	36	753	1	0	0	0	1	0	0	0		TTTTGTTACATTATAACTATTTATTAACATACAATTTCTAAAATCTTACCT
267521	'+'	1	1	2.22	4	11.6	1	Cj0292c	pseudo	NA	1294	0	0	0	1	1	0	0	1		AATCTAACTTTTGCTTGGTATTTTTGCAAGCAAAAGTTAAAATTGTTATTG
267890	'-'	1	1	19.2	2.13	12.93	1	Cj0292c	pseudo	NA	1294	0	0	1	0	1	0	0	0		GCTATACCTTCTACTTTACTTGCAGGATATATTTCAGATAAAATTTTTAAA
268924	'-'	1	1	162.99	13.97	5.34	1	Cj0292c	pseudo	115	1294	1	0	0	0	1	0	0	0		TTTCGTATTATTTTTAATTATTTTTTTATTTTATATCGATTAACATTATTT
269012	'+'	1	1	3.33	3	8.7	1	Cj0293	stationary phase survival protein SurE	52	777	0	1	0	0	1	0	0	0		AAATAATACGAAATTTATATAATTTAAAAATTAAAATTTTATACTATGAAG
269040	'+'	1	1	46.57	11.08	5.54	1	Cj0293	stationary phase survival protein SurE	24	777	1	0	0	0	1	0	0	0		AATTAAAATTTTATACTATGAAGCTTTAAAAAAATATGTTAAAATCCAGAT
272383	'-'	1	1	29.11	2.23	3.25	2	Cj0297c	pantoate--beta-alanine ligase	117	849	1	0	0	0	1	0	0	0		TAAAGATTTTAAAGCAAAATTTGTAAAGCATTTTGATAAAATTGATCCTCA
272383	'-'	1	1	29.11	2.23	3.25	2	Cj0298c	3-methyl-2-oxobutanoate hydroxymethyltransferase	NA	825	0	0	1	0	1	0	0	0		TAAAGATTTTAAAGCAAAATTTGTAAAGCATTTTGATAAAATTGATCCTCA
272468	'+'	1	1	1.48	2	>100	1	Cj0298c	3-methyl-2-oxobutanoate hydroxymethyltransferase	NA	825	0	0	0	1	1	0	0	1		TGCTTTAAAATCTTTATTTAAACCCAAAAGATCGTGATAAACTAAAACTTG
273137	'-'	1	1	140.82	18.32	4.67	1	Cj0298c	3-methyl-2-oxobutanoate hydroxymethyltransferase	36	825	1	0	0	0	1	0	0	0		TACTTTATCATTCATTTACTATTTATGAAAAATTATATGCTAGTTTTTTGC
273275	'+'	1	1	51.74	15.33	8.03	1	Cj0299	putative periplasmic beta-lactamase	46	774	1	0	0	0	1	0	0	0		ATTTTAGAAAATTTCAGTTCATGTTAAAGGATATTTAAAGAAAATAAAGCT
273414	'+'	1	1	3.7	1.91	3.4	1	Cj0299	putative periplasmic beta-lactamase	NA	774	0	0	1	0	1	0	0	0		TTGGGCAAGATAAGATATTAAATAATTGGTTTAAAGAGTATAATACAAGCG
276901	'-'	1	1	19.22	2.86	4.78	1	Cj0303c	putative molybdate-binding lipoprotein	27	750	0	1	0	0	1	0	0	0		ATTTTATGCAAAAATGATATAAAATGAATTTTTTGTGTTATAATCCAAAAA
277377	'-'	1	1	5.91	7	2.87	1	Cj0304c	putative biotin synthesis protein	NA	687	0	0	1	0	1	0	0	0		TAAAAAACGATATTTTAGATTTTAAAGAAAATTCTAGTATTTTAATTTTTG
278755	'-'	1	1	19.59	4.53	2.37	1	Cj0306c	8-amino-7-oxononanoate synthase	NA	1143	0	0	1	0	1	0	0	0		GCGATTTTAAAACTCTGTGTGAGCTTAAAAGGCGTTATGATAAAATTAAGC
279387	'-'	1	1	103.49	12.67	8.83	2	Cj0306c	8-amino-7-oxononanoate synthase	29	1143	1	0	0	0	1	0	0	1		TTGATTTTGCATTATAACTTCTTTTTTAAAAATATTTTGGCAAAATAATAC
279387	'-'	1	1	103.49	12.67	8.83	2	Cj0307	adenosylmethionine--8-amino-7-oxononanoate transaminase	NA	1284	0	0	0	1	1	0	0	1		TTGATTTTGCATTATAACTTCTTTTTTAAAAATATTTTGGCAAAATAATAC
281063	'+'	1	1	1.55	5	>100	1	Cj0308c	putative dethiobiotin synthetase	NA	606	0	0	0	1	1	0	0	1		CACCCGCAAGCTCAATAAGTAGGTTTTTGCTTTTTGGTAAAATGATATCTA
281463	'-'	1	1	27.72	>100	2.58	2	Cj0308c	putative dethiobiotin synthetase	162	606	1	0	0	0	1	0	0	0		GTTTTGGATTTTCTTTTACTTTTTTAAGCTTAAGTATGCAAAATATCGCTA
281463	'-'	1	1	27.72	>100	2.58	2	Cj0309c	putative efflux protein	NA	315	0	0	1	0	1	0	0	0		GTTTTGGATTTTCTTTTACTTTTTTAAGCTTAAGTATGCAAAATATCGCTA
281996	'-'	1	1	246.89	9.46	3.56	1	Cj0310c	putative efflux protein	29	339	1	0	0	0	1	0	0	0		AAAAGTAAATTTATAGCTTCTTTTAATTTCTTTAAGATATAATTTGTTTTA
282077	'+'	1	1	2534.67	51.83	5.96	1	Cj0311	50S ribosomal protein L25%2Fgeneral stress protein Ctc	24	537	1	0	0	0	1	0	0	0		GAAGCTATAAATTTACTTTTCCATAAGCCAAAATTAGATATAATCAAAGCT
283240	'+'	1	1	24.15	1.85	5.03	1	Cj0313	putative integral membrane protein	NA	1059	0	0	1	0	1	0	0	0		TTTTTTCGTTTTATTTCAGGGATTTATTTAAAAAATTTTTTTATTATATTT
284265	'+'	1	1	87.63	10.43	2.54	1	Cj0314	diaminopimelate decarboxylase	18	1209	1	0	0	0	1	0	0	0		TTATATGTATTATAAGCATCGATAAATTAAGCTTTGTGTAGTAAAATTATA
285009	'-'	1	1	27.72	76	21.56	1	Cj0314	diaminopimelate decarboxylase	NA	1209	0	0	0	1	1	0	0	1		CTCCATTCCTATAGTTAAATCAAGCCCATGAAGTTGTGCTAATATACCTTG
287492	'-'	1	1	4.44	7.5	6.22	1	Cj0317	histidinol-phosphate aminotransferase	NA	1095	0	0	0	1	1	0	0	1		TGTATTTTTGAGCCAATGTGCTTTTAAGTTCTATCATACTATCATCAGGGT
291618	'-'	1	1	10.35	3.82	17.41	1	Cj0320	flagellar assembly protein H	NA	831	0	0	0	1	1	0	0	1		AAATTTTCAAGATTTTCGCAAGCATTATCAAGTTTGGCTATACTTTTTAAA
293673	'+'	1	0	14.41	20.5	0.7	2	Cj0322	peroxide stress regulator	258	411	0	1	0	0	1	0	0	0		TAAAAAAAGTAAAATTTGGTTTATTTTTAGTGAAAATGTTAAAATTGGCGG
293673	'+'	1	0	14.41	20.5	0.7	2	Cj0321	1-deoxy-D-xylulose-5-phosphate synthase	NA	1848	0	0	1	0	1	0	0	0		TAAAAAAAGTAAAATTTGGTTTATTTTTAGTGAAAATGTTAAAATTGGCGG
293907	'+'	1	1	28.8	17.5	3.91	1	Cj0322	peroxide stress regulator	24	411	1	0	0	0	1	0	0	0		TATTATTTAATATAAACTTCTTTTAATGAAAATTTTATTATTATTTTTACT
294365	'+'	1	1	291.24	>100	4.82	1	Cj0323	hypothetical protein	22	1197	1	0	0	0	1	0	0	0		GTTGATAATTGCAAAAAGTGTCATTAAGCAAAATAAGGTTAAAATAACCCA
295898	'+'	1	1	47.68	12.73	4.58	1	Cj0324	ubiquinone%2Fmenaquinone biosynthesis methyltransferase	NA	708	0	0	1	0	1	0	0	0		GCATGCTAAATGTTGCAAAAGAAAAATTTCCAAATGTCGAATTTATAAAAG
296853	'+'	1	1	12.94	5.38	2.44	1	Cj0325	exodeoxyribonuclease VII large subunit	NA	1164	0	0	1	0	1	0	0	0		AATGCTCCTTTTTCTCTTATACAAGCTTTAAAAAAAGCCGATGATATGGAT
296859	'-'	1	1	55.81	76.5	6.94	1	Cj0325	exodeoxyribonuclease VII large subunit	NA	1164	0	0	0	1	1	0	0	1		AAACAAAAAAGATCTTCCCTGCTTCCTCCACCACGTGCTATAATAAGAACA
297380	'+'	1	1	86.39	2.85	3.79	2	Cj0326	phosphoserine aminotransferase	83	1077	1	0	0	0	1	0	0	0		TAAAAGCAAAAAGTTTATTTGTATCAGAAAAAATGGTAAAATAGCAAATTT
297380	'+'	1	1	86.39	2.85	3.79	2	Cj0325	exodeoxyribonuclease VII large subunit	NA	1164	0	0	1	0	1	0	0	0		TAAAAGCAAAAAGTTTATTTGTATCAGAAAAAATGGTAAAATAGCAAATTT
298778	'+'	1	1	20.13	2.12	5.03	1	Cj0327	putative endoribonuclease L-PSP family protein	NA	351	0	0	1	0	1	0	0	0		ATCTGGTTAGCTAATATGCAAGATTTTGATGCAATGAATGAAATTTATGAT
299160	'+'	1	1	5.88	4.17	14.75	1	Cj0328c	3-oxoacyl-%28acyl carrier protein%29 synthase III	NA	975	0	0	0	1	1	0	0	1		GATTAGCTTGATGAGGAATAAAAAGATCAATTTCTTGTGCTAAAATGTTAT
300855	'+'	1	1	2.96	>100	14.92	1	Cj0329c	putative glycerol-3-phosphate acyltransferase PlsX	NA	987	0	0	0	1	1	0	0	1		CCACCCATTGCATCAATGGCAATGTTAATCATTGATTTTAATATTCCTTAG
300855	'+'	1	1	2.96	>100	14.92	1	Cj0330c	50S ribosomal protein L32	NA	147	0	0	0	1	1	0	0	1		CCACCCATTGCATCAATGGCAATGTTAATCATTGATTTTAATATTCCTTAG
301245	'-'	1	1	318.96	2.07	8.37	2	Cj0330c	50S ribosomal protein L32	257	147	1	0	0	0	1	0	0	0		TTGAGGGAAATTTAGTAAAAATAAATCCTAAGCTTGTTAAAATAAATGCTA
301245	'-'	1	1	318.96	2.07	8.37	2	Cj0331c	hypothetical protein	NA	354	0	0	1	0	1	0	0	0		TTGAGGGAAATTTAGTAAAAATAAATCCTAAGCTTGTTAAAATAAATGCTA
301250	'-'	1	1	75.77	14.67	5.09	2	Cj0330c	50S ribosomal protein L32	262	147	0	1	0	0	1	0	0	0		TATTTTTGAGGGAAATTTAGTAAAAATAAATCCTAAGCTTGTTAAAATAAA
301250	'-'	1	1	75.77	14.67	5.09	2	Cj0331c	hypothetical protein	NA	354	0	0	1	0	1	0	0	0		TATTTTTGAGGGAAATTTAGTAAAAATAAATCCTAAGCTTGTTAAAATAAA
301808	'-'	1	1	378.46	2.87	7.92	1	Cj0332c	nucleoside diphosphate kinase	29	414	1	0	0	0	1	0	0	0		TTTTTAATTTAATTTAACTTTCTTTAAACAAATTCAAGTATAATTTTAAGC
302353	'+'	1	1	1291.73	>100	4.9	1	Cj0334	alkyl hydroperoxide reductase	30	597	1	0	0	0	1	0	0	0		TATCTTAGATATTTAAAAAAAAATAAAGATTTAAACGATATAATTTCGTTA
303066	'+'	1	1	156.34	15.59	6.18	1	Cj0335	flagellar biosynthesis protein FlhB	32	1089	1	0	0	0	1	0	0	0		TCATTTTTATTCTTTAATTGAAATTCATAAATTTTCTACTATAATTTTACA
304917	'-'	1	1	306.87	7.93	13.93	1	Cj0336c	flagellar motor protein MotB	NA	744	0	0	1	0	1	0	0	0		CCAAGAATTTCACAATTTGACAAAGGTTAAAAATGGCTAAAAAACATAAAT
305783	'-'	1	0	26.61	6.63	1.82	2	Cj0337c	flagellar motor protein MotA	69	777	1	0	0	0	1	0	0	0		ATTTTGTAAAAAAAACTAGAGATATTATGGAAAATATAGTAAAATTAAAAG
305783	'-'	1	0	26.61	6.63	1.82	2	Cj0338c	DNA polymerase I	NA	2640	0	0	1	0	1	0	0	0		ATTTTGTAAAAAAAACTAGAGATATTATGGAAAATATAGTAAAATTAAAAG
307628	'-'	1	1	16.63	3.54	5.08	1	Cj0338c	DNA polymerase I	NA	2640	0	0	1	0	1	0	0	0		AAAATGCATTTTTAAGCAAAAAATTAGCTTCTTTGTATGACAATTTAGAAG
307805	'-'	1	1	81.68	9.19	4.47	1	Cj0338c	DNA polymerase I	NA	2640	0	0	1	0	1	0	0	0		TCAGAGATTTTTTAGCTCTTTGTGGGGATAGTTCTGATAATATTCCAGGCG
307845	'-'	1	1	26.01	7	3.12	1	Cj0338c	DNA polymerase I	NA	2640	0	0	1	0	1	0	0	0		GCAGCGTGTTTAGAAAAATACGGAGTAAAACCTAATCAAATCAGAGATTTT
308395	'+'	1	1	4.34	6.5	5.64	2	Cj0339	putative MFS transport protein	138	1362	0	1	0	0	1	0	0	1		TATCAACAATAGTTAAAGTTTTCATAATAATTTCTTCTTTTGATAAAATAT
308395	'+'	1	1	4.34	6.5	5.64	2	Cj0338c	DNA polymerase I	NA	2640	0	0	0	1	1	0	0	1		TATCAACAATAGTTAAAGTTTTCATAATAATTTCTTCTTTTGATAAAATAT
308491	'+'	1	1	97.94	4.15	2.89	1	Cj0339	putative MFS transport protein	42	1362	1	0	0	0	1	0	0	0		AATTTAAAGATATTTAAGCGAAAATACTTCAATTTTTAGTCATAATATCGA
310494	'+'	1	0	17.37	6.22	0.96	1	Cj0340	putative nucleoside hydrolase	NA	1008	0	0	1	0	1	0	0	0		TAGTGCTAAATTCAAGAGCTAAAATTACACTCATACCTTATAATGCAACCA
311009	'-'	1	1	9.98	2.5	8.95	1	Cj0341c	putative integral membrane protein	NA	444	0	0	1	0	1	0	0	0		CCTTGAAAAAATTAGAAAATTTCAATGCTAATTTTGCTAAATTTGGAAGTA
311270	'-'	1	1	42.73	48	12.3	1	Cj0341c	putative integral membrane protein	NA	444	0	0	1	0	1	0	0	0		AAATACACAAAAATCATAATTTTATGTTTGATTTTTTATATAATGATATTA
314156	'-'	1	1	55.07	2.08	7.34	1	Cj0342c	excinuclease ABC subunit A	29	2826	1	0	0	0	1	0	0	0		TTTTTAACTTGGATTTATCCAAGTTCTTTTAATATTATTATGCTAAAATCT
314165	'-'	1	1	41.39	>100	8.08	1	Cj0342c	excinuclease ABC subunit A	38	2826	0	1	0	0	1	0	0	0		TTTTATAAATTTTTAACTTGGATTTATCCAAGTTCTTTTAATATTATTATG
314221	'+'	1	1	3.7	>100	>100	1	Cj0342c	excinuclease ABC subunit A	NA	2826	0	0	0	1	1	0	0	1		AATATTAAAAGAACTTGGATAAATCCAAGTTAAAAATTTATAAAATTTAGC
314221	'+'	1	1	3.7	>100	>100	1	Cj0343c	putative integral membrane protein	NA	786	0	0	0	1	1	0	0	1		AATATTAAAAGAACTTGGATAAATCCAAGTTAAAAATTTATAAAATTTAGC
314753	'-'	1	1	10.72	8.25	2.2	1	Cj0343c	putative integral membrane protein	NA	786	0	0	1	0	1	0	0	0		TATTAATTATAAGAAAAAAAATCTAAATCTTAAAGATGGTATTATGATAGG
314805	'+'	1	1	4.03	>100	3.08	1	Cj0343c	putative integral membrane protein	NA	786	0	0	0	1	1	0	0	1		TATCATAATACCATCTTTAAGATTTAGATTTTTTTTCTTATAATTAATATA
315020	'-'	1	1	103.49	35.4	9.23	2	Cj0343c	putative integral membrane protein	35	786	1	0	0	0	1	0	0	1		GTTATAAAAAAACTAAGATAATACTTAGCTTAATAAGATAAAATTATTCCG
315020	'-'	1	1	103.49	35.4	9.23	2	Cj0344	hypothetical protein	NA	126	0	0	0	1	1	0	0	1		GTTATAAAAAAACTAAGATAATACTTAGCTTAATAAGATAAAATTATTCCG
315077	'+'	1	1	5.91	6.33	6.63	2	Cj0344	hypothetical protein	31	126	1	0	0	0	1	0	0	1		ATTTTATCTTATTAAGCTAAGTATTATCTTAGTTTTTTTATAACAATAGAA
315077	'+'	1	1	5.91	6.33	6.63	2	Cj0343c	putative integral membrane protein	NA	786	0	0	0	1	1	0	0	1		ATTTTATCTTATTAAGCTAAGTATTATCTTAGTTTTTTTATAACAATAGAA
315131	'-'	1	1	9.98	8	6.63	2	Cj0343c	putative integral membrane protein	146	786	0	1	0	0	1	0	0	1		AATAAATATAAATTTTGCTTTAAATTTAAAATAAATATTATAAAATCTTTA
315131	'-'	1	1	9.98	8	6.63	2	Cj0344	hypothetical protein	NA	126	0	0	0	1	1	0	0	1		AATAAATATAAATTTTGCTTTAAATTTAAAATAAATATTATAAAATCTTTA
315197	'+'	1	1	7834.64	60.54	8.37	2	Cj0345	putative anthranilate synthase component I	201	1251	1	0	0	0	1	0	0	0		TTTATTTTAAATTTAAAGCAAAATTTATATTTATTGATTAAAATTAATTTA
315197	'+'	1	1	7834.64	60.54	8.37	2	Cj0344	hypothetical protein	NA	126	0	0	1	0	1	0	0	0		TTTATTTTAAATTTAAAGCAAAATTTATATTTATTGATTAAAATTAATTTA
317304	'-'	1	1	7.74	>100	43.1	1	Cj0346	anthranilate synthase component II	NA	1602	0	0	0	1	1	0	0	1		AACAAAGCCACTACTTGTAAAATTTCATAATCTTTAGACATAATAATCTTA
317514	'-'	1	1	7.74	>100	14.37	1	Cj0346	anthranilate synthase component II	NA	1602	0	0	0	1	1	0	0	1		CGATTTCCGTGTTTGGCTACTTTTACTCCTAAAGCTGCTAAAATAAAAGCA
319579	'+'	1	1	34	31.67	7.7	1	Cj0348	tryptophan synthase subunit beta	NA	1179	0	0	1	0	1	0	0	0		CTGGGATTTTTTATGATTTTATCAAAGATGAAAATGTTAAACTTATAGGTA
320419	'+'	1	1	4.34	>100	3.87	1	Cj0349	tryptophan synthase subunit alpha	NA	750	0	0	1	0	1	0	0	0		TTTGAAGAAAGTGATGATTTGATTAAAGAGTGTGAAAGATATAATATAGCT
320788	'+'	1	1	80.94	12.53	4.91	1	Cj0350	hypothetical protein	32	423	0	1	0	0	1	0	0	0		TTCAAAAAATAAAATTTTAAAACATATTTTTATTTTATATTTACTATAATT
320793	'+'	1	1	916.96	2.63	4.68	1	Cj0350	hypothetical protein	27	423	1	0	0	0	1	0	0	0		AAAATAAAATTTTAAAACATATTTTTATTTTATATTTACTATAATTTTAAA
321998	'-'	1	1	136.75	12.21	11.15	1	Cj0352	putative transmembrane protein	NA	798	0	0	0	1	1	0	0	1		TACTATTAACAAAATAACTAAAATTAGCATTACTAAGATATAATTTGTATA
323341	'-'	1	1	182.39	13.04	7.92	1	Cj0353c	phosphatase	NA	1461	0	0	1	0	1	0	0	0		GGTGGTGGTTCTAGTGAATTGTGTTTAATAAAAAATAATAGAATTATTTCT
324079	'-'	1	1	198.1	2.98	6.4	1	Cj0354c	ferredoxin	29	246	1	0	0	0	1	0	0	0		TTATTTCTATTTTTATATTTTATTTAAGTTTGGTTATTGTATAAACTAAAA
325290	'+'	1	1	19.82	33	4.38	1	Cj0356c	putative dihydroneopterin aldolase	NA	318	0	0	0	1	1	0	0	1		AAAATCAATCTTTTAATATTAGGTAGATGTTTATATACTATAATAAAAGCG
325290	'+'	1	1	19.82	33	4.38	1	Cj0357c	putative glycerol-3-phosphate acyltransferase PlsY	NA	609	0	0	0	1	1	0	0	1		AAAATCAATCTTTTAATATTAGGTAGATGTTTATATACTATAATAAAAGCG
325864	'-'	1	1	569.54	6.93	3.72	1	Cj0357c	putative glycerol-3-phosphate acyltransferase PlsY	41	609	1	0	0	0	1	0	0	0		CCTATAAAAATTATTTTTGTTTATTTATTTTCATAAGATATAATTTTTAGT
325994	'+'	1	1	3912.52	3.06	9.01	1	Cj0358	putative cytochrome C551 peroxidase	30	1026	1	0	0	0	1	0	0	0		TTTTTTAATAATATTTATTTTTATTTAAGCTCTAAATGATTATTATTTTAT
327120	'+'	1	0	27.25	3.75	1.43	1	Cj0360	phosphoglucosamine mutase	23	1338	1	0	0	0	1	0	0	0		TTTAGAGCTTGTTTAAATTTCTTTATCTTAGCTTTGTTATAATTGTCTTTA
329341	'+'	1	1	383.27	>100	7.83	2	Cj0362	putative integral membrane protein	NA	453	0	0	1	0	1	0	0	1		AAAGTGGAAAATATTTTAGAATTTATAATGAATTTCCAACTATAATGTTTA
329341	'+'	1	1	383.27	>100	7.83	2	Cj0363c	coproporphyrinogen III oxidase	NA	1347	0	0	0	1	1	0	0	1		AAAGTGGAAAATATTTTAGAATTTATAATGAATTTCCAACTATAATGTTTA
330749	'-'	1	1	24.46	16.8	4.35	1	Cj0363c	coproporphyrinogen III oxidase	27	1347	1	0	0	0	1	0	0	0		GAAATAAAAAATTTACTCCTATTTTAGCTAAAAATTGATAAAGTTATGTCT
331538	'+'	1	1	6.5	14	6.87	1	Cj0365c	outer membrane channel protein CmeC	NA	1479	0	0	0	1	1	0	0	1		TTCATCTTTATTAAGCTTGGCTAAATTTACATTTTGGTAAATTTCACCCCA
334648	'-'	1	0	5.17	>100	1.99	1	Cj0366c	inner membrane efflux transporter CmeB	NA	3123	0	0	1	0	1	0	0	0		GAAGTTGTTAAAACTTTTGTTGAAGCTCTAATTTTAGTTATCATTGTTATG
336150	'+'	1	1	38.29	7.87	88.07	1	Cj0367c	periplasmic fusion protein CmeA	NA	1104	0	0	0	1	1	0	0	1		AGATTTAAATTTGCATGAATGCTGTCTAAATCCCATTTTCCATTTTGAGTA
337811	'+'	1	1	4.07	>100	10.78	1	Cj0369c	putative ferredoxin domain-containing integral membrane protein	NA	1377	0	0	0	1	1	0	0	1		ATTTCAATTCCATCATTTATTCCTTCTAAATTTGCTGTAAAATAATATTCA
337904	'+'	1	1	24.39	12	7.1	1	Cj0369c	putative ferredoxin domain-containing integral membrane protein	NA	1377	0	0	0	1	1	0	0	1		TTTGAAATGACTAATTCACCTTTAACATTTGAAATATTATATAATTCACTA
338412	'+'	1	1	2.48	>100	2.27	1	Cj0369c	putative ferredoxin domain-containing integral membrane protein	NA	1377	0	0	0	1	1	0	0	1		AGGTAATATCCAAAGTAAAAAGTAAGCTAGCACAAAATAAAATTCCAAGTA
338946	'-'	1	1	463.1	2.22	4.89	1	Cj0369c	putative ferredoxin domain-containing integral membrane protein	35	1377	1	0	0	0	1	0	0	0		AGAAAGCATTTAAAAATTGTTTTAGTTTTTATCGGTTATAATCCTTAATTA
339034	'+'	1	1	41511.3	49.46	9.63	1	Cj0370	30S ribosomal protein S21	37	213	1	0	0	0	1	0	0	0		TTAAATGCTTTCTAAGTTAGAATTAATAAGAAGTGTTTTATAATTATATTT
339366	'+'	1	1	34.37	>100	3.77	1	Cj0371	hypothetical protein	37	606	0	1	0	0	1	0	0	0		CAAACTTCATTTGGTATTAAATTAAAAAGTATTTATTATTTTTTGTTAAAA
339373	'+'	1	1	206.97	3.18	4.66	1	Cj0371	hypothetical protein	30	606	1	0	0	0	1	0	0	0		CATTTGGTATTAAATTAAAAAGTATTTATTATTTTTTGTTAAAATTTCTAA
339638	'-'	1	1	2.96	>100	>100	1	Cj0371	hypothetical protein	NA	606	0	0	0	1	1	0	0	1		CTTCTTCTTTAATCAAAGCATCCATTTCTTCTTTGGATAAAATTCTTTCTG
340982	'+'	1	1	203.28	31.56	9.14	2	Cj0373	2-hydroxyacid dehydrogenase	208	936	1	0	0	0	1	0	0	0		TAAAAAACCTGTTTTTGGTAGAGAAGGTGCAAATATCAGTATAATTAAAGA
340982	'+'	1	1	203.28	31.56	9.14	2	Cj0372	putative glutathionylspermidine synthase	NA	1170	0	0	1	0	1	0	0	0		TAAAAAACCTGTTTTTGGTAGAGAAGGTGCAAATATCAGTATAATTAAAGA
341793	'+'	1	1	30.31	83	4.17	1	Cj0373	2-hydroxyacid dehydrogenase	NA	936	0	0	1	0	1	0	0	0		TTGTACATTTGGAATTAAAAGATTTATTAAAAACTTGCGATATTATAAGTA
342076	'-'	1	1	2.96	>100	8.29	1	Cj0373	2-hydroxyacid dehydrogenase	NA	936	0	0	0	1	1	0	0	1		TTCACTTGCCATTTTCTATCCATTCTTTTAAATTATTATAAACTATATCCA
342076	'-'	1	1	2.96	>100	8.29	1	Cj0374	putative nucleotide-binding protein	NA	492	0	0	0	1	1	0	0	1		TTCACTTGCCATTTTCTATCCATTCTTTTAAATTATTATAAACTATATCCA
343057	'+'	1	1	123.44	>100	5.19	2	Cj0376	putative periplasmic protein	45	825	1	0	0	0	1	0	0	0		TTTTTATCAAGTTTGTGATAATAAAGTAAGTTTTTTTGATAAAATTTCACA
343057	'+'	1	1	123.44	>100	5.19	2	Cj0375	putative lipoprotein	NA	477	0	0	1	0	1	0	0	0		TTTTTATCAAGTTTGTGATAATAAAGTAAGTTTTTTTGATAAAATTTCACA
344073	'-'	1	1	9.98	28	23.82	1	Cj0377	putative AAA family ATPase	NA	1713	0	0	0	1	1	0	0	1		AGCATCAAGATAAAGATACTTATCATTTCCAAAAATTGTCGATAATAAAGT
344864	'-'	1	1	6.28	>100	>100	1	Cj0377	putative AAA family ATPase	NA	1713	0	0	0	1	1	0	0	1		TTTAAAATATTTTCTAAAAGCTCTTTTGTATTTTCAGGCATAATAATATCA
345461	'-'	1	1	19.22	38	5.78	1	Cj0377	putative AAA family ATPase	NA	1713	0	0	0	1	1	0	0	1		ACCATTAAAATTTGTGCTCCACTTAATTCATAATTTGATAAAATATTTATA
345473	'+'	1	1	54.7	38	2.03	1	Cj0377	putative AAA family ATPase	NA	1713	0	0	1	0	1	0	0	0		TTTCTACCTAAAAAAGCATTATTTGAAAAAGATTTTGATATAAATATTTTA
346114	'+'	1	1	7.12	>100	12.71	1	Cj0378c	putative ferric reductase-like transmembrane protein	NA	540	0	0	0	1	1	0	0	1		AATATAGGCTTCTTTTACAAAATCAAAGGCTTTTATGATATGATAAAAGCC
346114	'+'	1	1	7.12	>100	12.71	1	Cj0379c	putative sulfite oxidase subunit YedY	NA	894	0	0	0	1	1	0	0	1		AATATAGGCTTCTTTTACAAAATCAAAGGCTTTTATGATATGATAAAAGCC
349019	'+'	1	1	7.02	>100	22.69	1	Cj0382c	transcription antitermination protein NusB	NA	399	0	0	0	1	1	0	0	1		GTTTAAATTATCTAAAATTCCATTATATAAATTTAAAGTAAAATTTTTTTG
350459	'-'	1	1	1430.79	43.64	5.98	2	Cj0384c	2-dehydro-3-deoxyphosphooctonate aldolase	44	816	1	0	0	0	1	0	0	0		TTTTGGGAGATAATTTACCAAGTACTATGGTTTTTTTAGGTATAATAGGCA
350459	'-'	1	1	1430.79	43.64	5.98	2	Cj0385c	putative integral membrane protein	NA	933	0	0	1	0	1	0	0	0		TTTTGGGAGATAATTTACCAAGTACTATGGTTTTTTTAGGTATAATAGGCA
350466	'-'	1	1	4.8	2.17	3.59	2	Cj0384c	2-dehydro-3-deoxyphosphooctonate aldolase	51	816	0	1	0	0	1	0	0	0		GGGATAATTTTGGGAGATAATTTACCAAGTACTATGGTTTTTTTAGGTATA
350466	'-'	1	1	4.8	2.17	3.59	2	Cj0385c	putative integral membrane protein	NA	933	0	0	1	0	1	0	0	0		GGGATAATTTTGGGAGATAATTTACCAAGTACTATGGTTTTTTTAGGTATA
351366	'-'	1	0	8.98	15.5	1.61	2	Cj0385c	putative integral membrane protein	22	933	1	0	0	0	1	0	0	1		TTATATAAAATTTGGCTTAATATTAAGCAAAAAAAGACTAGAATTAACCCA
351366	'-'	1	0	8.98	15.5	1.61	2	Cj0386	GTP-binding protein EngA	NA	1383	0	0	0	1	1	0	0	1		TTATATAAAATTTGGCTTAATATTAAGCAAAAAAAGACTAGAATTAACCCA
351421	'+'	1	1	48.42	>100	2.48	2	Cj0386	GTP-binding protein EngA	25	1383	1	0	0	0	1	0	0	1		TAATTCTAGTCTTTTTTTGCTTAATATTAAGCCAAATTTTATATAATTTTA
351421	'+'	1	1	48.42	>100	2.48	2	Cj0385c	putative integral membrane protein	NA	933	0	0	0	1	1	0	0	1		TAATTCTAGTCTTTTTTTGCTTAATATTAAGCCAAATTTTATATAATTTTA
352462	'+'	1	1	164.74	25.18	10.93	1	Cj0386	GTP-binding protein EngA	NA	1383	0	0	1	0	1	0	0	0		GATAAGACTGTAAAAGAATTGCGTCTTGATCGTTTTAAATTTCTAGCTTAC
352647	'+'	1	1	14.41	30.25	2.4	2	Cj0387	shikimate kinase	168	498	1	0	0	0	1	0	0	0		AAGAGCACATCCTTTGCCGCATGATTATGGGAAATTGGTTAAAATTTATTA
352647	'+'	1	1	14.41	30.25	2.4	2	Cj0386	GTP-binding protein EngA	NA	1383	0	0	1	0	1	0	0	0		AAGAGCACATCCTTTGCCGCATGATTATGGGAAATTGGTTAAAATTTATTA
353216	'+'	1	1	303.81	>100	7.11	2	Cj0388	tryptophanyl-tRNA synthetase	93	960	1	0	0	0	1	0	0	0		AGACCTTTATTTTATGATGAAATTAAAGCAAAAAAATTATATAATGAGCGT
353216	'+'	1	1	303.81	>100	7.11	2	Cj0387	shikimate kinase	NA	498	0	0	1	0	1	0	0	0		AGACCTTTATTTTATGATGAAATTAAAGCAAAAAAATTATATAATGAGCGT
353843	'+'	1	0	4.95	1.67	1.58	1	Cj0388	tryptophanyl-tRNA synthetase	NA	960	0	0	1	0	1	0	0	0		ATGAATGGGGTGAAATTTTTACCCTTCCAGAAGCGAGAGTTAATGAAGAAG
356228	'+'	1	1	4.8	2.44	3.05	1	Cj0390	putative transmembrane protein	NA	2463	0	0	1	0	1	0	0	0		GTTTGTGCTTTAAAGCTTAATGATAAGGAAAAATTTAGATATTATATTGAT
357015	'-'	1	1	7.76	>100	7.46	1	Cj0390	putative transmembrane protein	NA	2463	0	0	0	1	1	0	0	1		ATTTTGCATTTGGGCATAAGTTAAAGCCAAATTATAATGTAAAATACTATG
357213	'-'	1	1	3.7	>100	6.63	1	Cj0390	putative transmembrane protein	NA	2463	0	0	0	1	1	0	0	1		ATTAACTAAAAATAACATACTTTTTTGCATATTAGCTTTAAAATTAGAATC
357261	'+'	1	0	11.09	31	1.95	1	Cj0390	putative transmembrane protein	NA	2463	0	0	1	0	1	0	0	0		CTGATTCTAATTTTAAAGCTAATATGCAAAAAAGTATGTTATTTTTAGTTA
358029	'+'	1	1	28.8	>100	8.38	1	Cj0391c	hypothetical protein	NA	636	0	0	0	1	1	0	0	1		ACAACTAAAAATGCTTAGAAATTTCTAAGCATTTTTAGTTAAGCTTGAAGA
358674	'-'	1	1	3355.54	15.62	7.99	1	Cj0391c	hypothetical protein	22	636	1	0	0	0	1	0	0	0		GAATTTAATGTCCTTATAAATTTTTTAAGTCAAAAGTCGATATAAATTAAA
358769	'+'	1	1	24.39	14.5	6.37	1	Cj0392c	pyruvate kinase	NA	1443	0	0	0	1	1	0	0	1		AAATTCCTTATTTTCAAAGGAATTTAATGTTTTATTGTAGATAATAAGCAA
359458	'-'	1	1	25.39	12.39	2.39	1	Cj0392c	pyruvate kinase	NA	1443	0	0	1	0	1	0	0	0		GTAGAAAATATTGATGAGATTATTAAATCTAGCGATGGTATAATGGTTGCA
359575	'+'	1	1	33.44	25	14.54	1	Cj0392c	pyruvate kinase	NA	1443	0	0	0	1	1	0	0	1		ATTTTTGCAAAAATAGATATTTTTGCGTTATTTTGTGCTAAAATTTCACGA
361624	'-'	1	0	1.55	>100	1.42	1	Cj0393c	putative malate:quinone oxidoreductase	37	1347	0	1	0	0	1	0	0	0		CCTTAATGAAATTTAACTTTTTGTAAAACAAATTCAATTAAACTTCTATTT
361757	'-'	1	0	2.96	3.67	0.86	2	Cj0393c	putative malate:quinone oxidoreductase	170	1347	1	0	0	0	1	0	0	0		CAATTTTTAGCAAATTATTTCGATCACGCAATTTATGATAAACTTTTAATC
361757	'-'	1	0	2.96	3.67	0.86	2	Cj0394c	pantothenate kinase	NA	630	0	0	1	0	1	0	0	0		CAATTTTTAGCAAATTATTTCGATCACGCAATTTATGATAAACTTTTAATC
362130	'-'	1	0	6.65	7	1.22	1	Cj0394c	pantothenate kinase	NA	630	0	0	1	0	1	0	0	0		AAAAAATTTTATCAATCTTGAACCTTATTTTTTATTTGATACAATTTATCA
362288	'+'	1	1	4.44	>100	18.15	1	Cj0394c	pantothenate kinase	NA	630	0	0	0	1	1	0	0	1		TCATTTTTAAATTCTAAAAACTGATCTATATTAAGAGTAAAATATTTGTTA
362288	'+'	1	1	4.44	>100	18.15	1	Cj0395c	hypothetical protein	NA	291	0	0	0	1	1	0	0	1		TCATTTTTAAATTCTAAAAACTGATCTATATTAAGAGTAAAATATTTGTTA
364226	'-'	1	1	1381.54	>100	7.96	2	Cj0397c	hypothetical protein	44	579	1	0	0	0	1	0	0	1		AAGCTTTAAATTGTTTAGGATATTTTGCAATTTATATGATACAATACTATA
364226	'-'	1	1	1381.54	>100	7.96	2	Cj0398	aspartyl%2Fglutamyl-tRNA amidotransferase subunit C	NA	285	0	0	0	1	1	0	0	1		AAGCTTTAAATTGTTTAGGATATTTTGCAATTTATATGATACAATACTATA
364294	'+'	1	0	169.64	67.67	1.72	1	Cj0398	aspartyl%2Fglutamyl-tRNA amidotransferase subunit C	32	285	1	0	0	0	1	0	0	0		AAATTGCAAAATATCCTAAACAATTTAAAGCTTTTTATGATATAATTTTCA
369145	'+'	1	1	31.79	29.67	2.46	1	Cj0404	putative transmembrane protein	NA	837	0	0	1	0	1	0	0	0		TTTTACGAGTTATTGCTTTAGTTATTTTGTTTTTAGCTATCATGATAGTTA
369358	'-'	1	1	10.35	3.12	9.83	1	Cj0404	putative transmembrane protein	NA	837	0	0	0	1	1	0	0	1		TGCTGGAACTTCTTGATCAGGCATAGCAAAATTTGTAGTATCATTGTTATT
369717	'+'	1	0	12.94	18.5	1.32	2	Cj0405	shikimate 5-dehydrogenase	135	789	1	0	0	0	1	0	0	0		CAAAAATCAAAAGAACTTGCTTCTGTAAAGCAAAAAGGTTATGATTATAAA
369717	'+'	1	0	12.94	18.5	1.32	2	Cj0404	putative transmembrane protein	NA	837	0	0	1	0	1	0	0	0		CAAAAATCAAAAGAACTTGCTTCTGTAAAGCAAAAAGGTTATGATTATAAA
371640	'-'	1	0	83.53	33.29	1.6	2	Cj0406c	putative lipoprotein	26	900	1	0	0	0	1	0	0	1		TTTTCTTTTATAAAAATATAACAAAAAAACTTTAACTTGCTATAATTAACA
371640	'-'	1	0	83.53	33.29	1.6	2	Cj0407	prolipoprotein diacylglyceryl transferase	NA	816	0	0	0	1	1	0	0	1		TTTTCTTTTATAAAAATATAACAAAAAAACTTTAACTTGCTATAATTAACA
371669	'+'	1	1	26.24	8.89	30.25	2	Cj0407	prolipoprotein diacylglyceryl transferase	35	816	1	0	0	0	1	0	0	1		TACCTTTATTTAATGTGTTTGTGTTAATTATAGCAAGTTAAAGTTTTTTTG
371669	'+'	1	1	26.24	8.89	30.25	2	Cj0406c	putative lipoprotein	NA	900	0	0	0	1	1	0	0	1		TACCTTTATTTAATGTGTTTGTGTTAATTATAGCAAGTTAAAGTTTTTTTG
372554	'+'	1	0	404.34	>100	1.92	1	Cj0408	fumarate reductase cytochrome b-556 subunit	35	783	1	0	0	0	1	0	0	0		AAAAGTAAATATTTAATCTATCTTAAAGACTTTTGTAATATAATGAAATGG
377743	'-'	1	1	4.8	5	3.08	1	Cj0411	putative ATP%2FGTP binding protein	NA	2187	0	0	0	1	1	0	0	1		TAATTTCTCTTAAAATATCATTAATCCCATCTTTTGTGGTAATATCAACTA
380911	'+'	1	1	92.03	16.43	16.66	1	Cj0414	putative oxidoreductase subunit	26	729	1	0	0	0	1	0	0	0		TTTATCGCTTTTTAAAGTTAAATTTATATTAATAGGACTAATATAGTCTTG
381110	'+'	1	1	32.89	14.33	4.32	1	Cj0414	putative oxidoreductase subunit	NA	729	0	0	1	0	1	0	0	0		CATCAAGCTTCACAAGGAAAATCAAATAAAATTAGAGGTAGAATGTTTTTT
383311	'+'	1	0	3.1	3	1.99	2	Cj0416	hypothetical protein	248	99	0	1	0	0	1	0	0	0		TTGTTGTAGGAGCAGGAAATTTCCAACATAATAGTGGATATAATCCAACTG
383311	'+'	1	0	3.1	3	1.99	2	Cj0415	putative GMC oxidoreductase subunit	NA	1722	0	0	1	0	1	0	0	0		TTGTTGTAGGAGCAGGAAATTTCCAACATAATAGTGGATATAATCCAACTG
383457	'+'	1	1	2151.03	21.07	5.67	1	Cj0416	hypothetical protein	102	99	1	0	0	0	1	0	0	0		TGAAAACTCTCAAGATTATAAATTTTTAATTTTCTTCCGATATAGTATATA
384930	'+'	1	1	2.48	2.6	2.16	2	Cj0420	putative periplasmic protein	265	573	0	1	0	0	1	0	0	0		AACTTTTTGAAAAAATTTTATTTTGTGAAAAGGCTATGATAGAATTTTACA
384930	'+'	1	1	2.48	2.6	2.16	2	Cj0419	putative histidine triad %28HIT%29 family protein	NA	363	0	0	1	0	1	0	0	0		AACTTTTTGAAAAAATTTTATTTTGTGAAAAGGCTATGATAGAATTTTACA
385166	'+'	1	1	640.22	52.31	4.09	1	Cj0420	putative periplasmic protein	29	573	1	0	0	0	1	0	0	0		TTTTGATTTTTATTAATGATTTGTTATGTTTTATCTAATAAAATTTTTATA
385986	'+'	1	1	4.44	7	5.39	1	Cj0421c	putative integral membrane protein	NA	957	0	0	0	1	1	0	0	1		TTTTATCATTAAAAATTAAAATAAAATCATTTTCTACGATAAAAATTTTTG
387025	'-'	1	1	28.49	2.89	3.79	1	Cj0422c	putative H-T-H containing protein	26	210	1	0	0	0	1	0	0	0		ATTGAATATTTCAAGTGTTTTTAATAAAGAAATTTTAATGTAAAATTTTTT
387141	'+'	1	1	23.65	2.31	3.21	1	Cj0423	putative integral membrane protein	27	228	0	1	0	0	1	0	0	0		TATTTAATATTTCAATATTAATTAAGTTATAGTATGGAATAATAGTTTTTA
387557	'+'	1	1	4.44	>100	6.81	1	Cj0424	putative acidic periplasmic protein	NA	633	0	0	1	0	1	0	0	0		ACAAATATCCAAATGGAAATTTAAAAAAAGAAATTCCCTATAATAAAGATT
388560	'+'	1	0	7.76	>100	1.66	1	Cj0426	putative ABC transporter ATP-binding protein	35	1578	1	0	0	0	1	0	0	0		TAATATTTTATACTCAATTAATTTCAAGTCTTTTTTTGATACAATTTCTTA
389639	'+'	1	1	50.16	55	12.43	1	Cj0426	putative ABC transporter ATP-binding protein	NA	1578	0	0	1	0	1	0	0	0		TGTTTTCAAATTTGGAGCTAAAAATAGAAAAAAATGATAAAATCGCTTTGA
389864	'+'	1	1	616.48	20.17	7.21	2	Cj0427	hypothetical protein	298	336	1	0	0	0	1	0	0	0		AATTTAAAGATCTAGATGAAATCCGTAAGTGTTTAGGTAGAATGCTTTTTA
389864	'+'	1	1	616.48	20.17	7.21	2	Cj0426	putative ABC transporter ATP-binding protein	NA	1578	0	0	1	0	1	0	0	0		AATTTAAAGATCTAGATGAAATCCGTAAGTGTTTAGGTAGAATGCTTTTTA
390549	'+'	1	1	1387.67	>100	16.29	1	Cj0428	hypothetical protein	23	384	1	0	0	0	1	0	0	0		AAACATTAATTTTTACATAAAAAGGAACGCTTTTTGCTTGTATAGTTTTTG
391600	'-'	1	1	16.26	7.29	5.12	1	Cj0429c	hypothetical protein	17	585	1	0	0	0	1	0	0	0		TCTTAAAAATTAACATCAAATTGATTTTAGTTTTTATAAGTATAATTTTAA
391614	'+'	1	1	27.35	5.35	8.6	2	Cj0430	putative integral membrane protein	97	1227	0	1	0	0	1	0	0	1		ATTTGATCAATAGTTTGCATTTTTGCCTTCTTTTATTTAAAATTATACTTA
391614	'+'	1	1	27.35	5.35	8.6	2	Cj0429c	hypothetical protein	NA	585	0	0	0	1	1	0	0	1		ATTTGATCAATAGTTTGCATTTTTGCCTTCTTTTATTTAAAATTATACTTA
391708	'+'	1	1	316	17.04	7.6	1	Cj0430	putative integral membrane protein	3	1227	1	0	0	0	1	0	0	0		TATTTGTATGATTTGCATTGATATTTTAAGTTTAATTTTGTAAAATTTTCA
392152	'-'	1	1	46.57	19	4.87	1	Cj0430	putative integral membrane protein	NA	1227	0	0	0	1	1	0	0	1		TAAAAATAAAATATTAAAAGATTTATCAACAAATAATACTATAATCAATAA
392173	'+'	1	1	3.33	2.5	5.53	1	Cj0430	putative integral membrane protein	NA	1227	0	0	1	0	1	0	0	0		AATATGAAAAAAAATGGCTTTTTTATATATTATTGATTATAGTATTATTTG
393055	'-'	1	1	3.7	2.67	18.15	1	Cj0431	putative periplasmic ATP%2FGTP-binding protein	NA	615	0	0	0	1	1	0	0	1		ACTCTTATACCTTCTTGCATCATGGCTAAACTTTGGGTATATTGGATATCA
393758	'+'	1	1	1.86	>100	4.26	1	orphan	orphan	NA	NA	0	0	0	0	1	0	0	0		ACTATTTAATCCTTTATTTAATCCCCTTTTAAGTTTAATTGGTTATACTTT
393763	'+'	1	1	37.94	6.03	8.73	1	orphan	orphan	NA	NA	0	0	0	0	1	0	0	0		TTAATCCTTTATTTAATCCCCTTTTAAGTTTAATTGGTTATACTTTCATTT
395622	'+'	1	1	137.18	2.13	3.26	2	Cjp04	tRNA-Ala	125	76	0	1	0	0	1	0	0	0		AGTGGAATCAGCGACTGGGGTGAAGTCGTAACAAGGTAACCGTAGGAGAAC
395622	'+'	1	1	137.18	2.13	3.26	2	Cjr04	16S ribosomal RNA	NA	1513	0	0	1	0	1	0	0	0		AGTGGAATCAGCGACTGGGGTGAAGTCGTAACAAGGTAACCGTAGGAGAAC
395747	'+'	1	1	54.09	3.71	3.04	1	Cjp04	tRNA-Ala	0	76	0	1	0	0	1	0	0	0		ATTGATTCTTGTTTAGATTTCAAAGATTGATGATAAAGCTAATTGTTTATG
396081	'+'	1	1	5.17	4.75	4.38	1	orphan	orphan	NA	NA	0	0	0	0	1	0	0	0		AATAGATATAAGTAGCATATACATTATGCATTTATATTTATAATGATTATG
396095	'+'	1	1	37.58	2.88	7.36	1	orphan	orphan	NA	NA	0	0	0	0	1	0	0	0		GCATATACATTATGCATTTATATTTATAATGATTATGTTAATATATATACT
396372	'-'	1	1	3.7	>100	46.42	1	Cjr05	23S ribosomal RNA	NA	2912	0	0	0	1	1	0	0	1		TTCTAAAACGCATCACTTCCTTGTTAAAGTTTTTATGATAAGACTTCTTTA
399623	'+'	1	0	68750.7	65.95	1.51	1	Cjr06	5S ribosomal RNA	21	120	1	0	0	0	1	0	0	0		ATTAAGCTTTATTCTTAAATTCAATCTTTCAAAGAATATTTAAATAACAAT
400235	'-'	1	1	68.13	7	5.42	1	Cj0432c	UDP-N-acetylmuramoyl-L-alanyl-D-glutamate synthetase	NA	1209	0	0	1	0	1	0	0	0		AAAGTGCTGTAATGGCTGCACTTAGTCGCTATAAAGATAAAAAAATCCATC
400872	'-'	1	1	29.73	7	6.63	1	Cj0432c	UDP-N-acetylmuramoyl-L-alanyl-D-glutamate synthetase	NA	1209	0	0	1	0	1	0	0	0		GCAAAAAATTTACAAAGCGAATATGACTTTTTTTATGATATCATGCCAAAA
402234	'-'	1	1	155.23	2.14	8.42	2	Cj0433c	phospho-N-acetylmuramoyl-pentapeptide-transferase	29	1062	1	0	0	0	1	0	0	1		TTTTCTCTCTTTTATAAGAATTTTTTTGGTTAGATTTTACTAAAATTAAAC
402234	'-'	1	1	155.23	2.14	8.42	2	Cj0434	phosphoglyceromutase	NA	1479	0	0	0	1	1	0	0	1		TTTTCTCTCTTTTATAAGAATTTTTTTGGTTAGATTTTACTAAAATTAAAC
403804	'+'	1	1	60.24	15.82	7.59	1	Cj0435	3-ketoacyl-%28acyl-carrier-protein%29 reductase	31	744	1	0	0	0	1	0	0	0		TTTATTTTAGTTTGTTTGCCTTTTTTATAAGAAATTTGTTAAGATTGCAAT
405091	'+'	1	1	414.31	>100	12.74	1	Cj0437	succinate dehydrogenase flavoprotein subunit	242	1836	1	0	0	0	1	0	0	0		ATCTTAATTAATATTAACTTTTTGTTATTTTTTTAAGGTATAATCATTCCG
405673	'+'	1	1	31.79	18.2	5.5	1	Cj0437	succinate dehydrogenase flavoprotein subunit	NA	1836	0	0	1	0	1	0	0	0		TTTTTCTAATGGAGATTCCTATAAATTACATGCTTATGATACTATTAAAGG
405850	'-'	1	1	14.24	3.36	13.68	1	Cj0437	succinate dehydrogenase flavoprotein subunit	NA	1836	0	0	0	1	1	0	0	1		CACCACTACTAATAGCATCATCTAAACAAGAATGCATTAAAATATGACCTG
406157	'+'	1	1	42.73	8.26	6.67	1	Cj0437	succinate dehydrogenase flavoprotein subunit	NA	1836	0	0	1	0	1	0	0	0		CTTAGAGCAGGACTTGGTTTTGAAGATCCTGAGATGATACAATTTCACCCA
408904	'+'	1	0	13.67	4.08	1.98	1	Cj0439	putative succinate dehydrogenase subunit C	NA	858	0	0	1	0	1	0	0	0		AGATTTCAAGATTATACTAATTCTAAAGCAAGATTGCCTATTATTCATTTA
409254	'+'	1	1	1.86	>100	9.95	1	Cj0440c	putative transcriptional regulator	NA	669	0	0	0	1	1	0	0	1		CTTGTAAGGATGATCTTTTAAATTTTCATTTTTTAAACGATTTATAATTTC
409710	'-'	1	1	18.11	10.8	2.36	2	Cj0440c	putative transcriptional regulator	27	669	1	0	0	0	1	0	0	1		ATTTTACTATAAAAAGCTTAAAATATTTATAGTTTTTCATTATACTTGAAA
409710	'-'	1	1	18.11	10.8	2.36	2	Cj0441	acyl carrier protein	NA	234	0	0	0	1	1	0	0	1		ATTTTACTATAAAAAGCTTAAAATATTTATAGTTTTTCATTATACTTGAAA
409760	'+'	1	1	42.87	3.76	12.8	2	Cj0441	acyl carrier protein	33	234	0	1	0	0	1	0	0	1		TTTCAAGTATAATGAAAAACTATAAATATTTTAAGCTTTTTATAGTAAAAT
409760	'+'	1	1	42.87	3.76	12.8	2	Cj0440c	putative transcriptional regulator	NA	669	0	0	0	1	1	0	0	1		TTTCAAGTATAATGAAAAACTATAAATATTTTAAGCTTTTTATAGTAAAAT
409765	'+'	1	1	1445.85	4.27	5.94	2	Cj0441	acyl carrier protein	28	234	1	0	0	0	1	0	0	1		AGTATAATGAAAAACTATAAATATTTTAAGCTTTTTATAGTAAAATACGCT
409765	'+'	1	1	1445.85	4.27	5.94	2	Cj0440c	putative transcriptional regulator	NA	669	0	0	0	1	1	0	0	1		AGTATAATGAAAAACTATAAATATTTTAAGCTTTTTATAGTAAAATACGCT
411818	'+'	1	1	138.11	11.14	2.78	1	Cj0443	acetyl-CoA carboxylase carboxyltransferase subunit alpha	NA	939	0	0	1	0	1	0	0	0		AAAGTGAAGCTATCGCTAGAAATTTATATGAATTAAGTGATTTGAAAATAC
413019	'-'	1	1	4.44	>100	>100	1	Cj0444	pseudo	NA	2072	0	0	0	1	1	0	0	1		TATCAGGTCTTTGTTGGTAATTATCAGGTTTTTGATTGTTATTATTCCAAA
413412	'+'	1	1	5.54	16	11.6	1	Cj0444	pseudo	NA	2072	0	0	1	0	1	0	0	0		AGGTAAGGTTGTTTTACCTTGGAATTTAGGTCAATACGGTAATTTAGTAAA
413585	'+'	1	1	9.24	>100	3.65	1	Cj0444	pseudo	NA	2072	0	0	1	0	1	0	0	0		TTATAACCGATGATTTGATTTTTACTACAGGTTTGCGTTATATTTATAGCA
413711	'-'	1	1	19.2	>100	34.26	1	Cj0444	pseudo	NA	2072	0	0	0	1	1	0	0	1		TTTTAAGTCAGGGTTTCCAAAAAGAGCATTGCCATTGGCATAATTATAATA
413726	'+'	1	1	19.22	4.5	6.22	1	Cj0444	pseudo	NA	2072	0	0	1	0	1	0	0	0		ATAAAACTCCTTCTGCCAAGCAGTTGACAAATGGATATTATAATTATGCCA
414493	'+'	1	1	15.89	>100	3.57	1	Cj0447	putative NUDIX hydrolase family protein	23	597	1	0	0	0	1	0	0	0		GCTTTAATCACCTTTATATTTTCAAAAAAGCAAAAATAAAGTACAATGTGA
416506	'-'	1	1	24872.2	51.26	7.21	1	Cj0449c	hypothetical protein	40	216	1	0	0	0	1	0	0	0		TTTTATTATTTTTTAAGCTAAAAATATCTTTTAATAGTGTAAAATACCTTA
416637	'+'	1	1	19.96	4.17	41.44	1	Cj0450c	50S ribosomal protein L28	NA	195	0	0	0	1	1	0	0	1		AAGTGATTTGTTAAAGTTTATTTTTAAATTGGAAATTTTAAAATTGAGGAA
416873	'-'	1	1	641.98	1.89	8.45	1	Cj0450c	50S ribosomal protein L28	28	195	1	0	0	0	1	0	0	0		AAAAACTATAAATTATGGAATATTTTAAGCTTAATTTTGATAAAATCTCCA
416953	'+'	1	1	966.86	2.54	7.78	1	Cj0451	ribulose-phosphate 3-epimerase	32	648	1	0	0	0	1	0	0	0		ATTCCATAATTTATAGTTTTTTTAATATATAAGTCGATAAAATATTATTTA
418392	'-'	1	1	4.8	2.25	4.39	1	Cj0452	DNA polymerase III subunit epsilon	NA	762	0	0	0	1	1	0	0	1		GCCTGTTACACAAGCTCCCGTCATTTATGTTTTAATTATACACTTTAAATA
418392	'-'	1	1	4.8	2.25	4.39	1	Cjs02		NA	105	0	0	0	1	1	0	0	1		GCCTGTTACACAAGCTCCCGTCATTTATGTTTTAATTATACACTTTAAATA
418392	'-'	1	1	4.8	2.25	4.39	1	TPP	TPP	NA	136	0	0	0	1	1	0	0	1		GCCTGTTACACAAGCTCCCGTCATTTATGTTTTAATTATACACTTTAAATA
418415	'+'	1	1	2401.25	90	8.8	2	TPP	TPP	0	136	1	0	0	0	1	0	0	0		AAACTGCACGTATAAAGCAAAAATAAATATTTAAAGTGTATAATTAAAACA
418415	'+'	1	1	2401.25	90	8.8	2	Cjs02		NA	105	0	0	1	0	1	0	0	0		AAACTGCACGTATAAAGCAAAAATAAATATTTAAAGTGTATAATTAAAACA
418698	'+'	1	0	12.2	4.67	1.12	1	Cj0453	thiamine biosynthesis protein ThiC	NA	1293	0	0	1	0	1	0	0	0		TTAAGTAAAGATTTTTTGCTTGAAAATATTGCTTGCGGTAAAATTATTATC
421514	'+'	1	1	16.26	>100	8.29	1	Cj0456c	hypothetical protein	NA	960	0	0	0	1	1	0	0	1		ATAAAAAATCTAAACCTCTATATTCTTCAAAAAGCTCGCTATAATATTCTA
421871	'-'	1	1	21.07	20	2.71	2	Cj0456c	hypothetical protein	23	960	0	1	0	0	1	0	0	0		AAAGAAAAAGCTAAAGAATTTCTAATGAAACAATTTGATAAAATTAGCTTA
421871	'-'	1	1	21.07	20	2.71	2	Cj0457c	putative lipoprotein	NA	630	0	0	1	0	1	0	0	0		AAAGAAAAAGCTAAAGAATTTCTAATGAAACAATTTGATAAAATTAGCTTA
422128	'-'	1	1	1001.97	74.27	9.41	2	Cj0456c	hypothetical protein	280	960	1	0	0	0	1	0	0	0		CACTTAGAGCTGCATTTAAAGTTTTAGAACAAAATGACGATATAGTTATCA
422128	'-'	1	1	1001.97	74.27	9.41	2	Cj0457c	putative lipoprotein	NA	630	0	0	1	0	1	0	0	0		CACTTAGAGCTGCATTTAAAGTTTTAGAACAAAATGACGATATAGTTATCA
422673	'+'	1	1	4.44	>100	13.61	1	Cj0458c	%28dimethylallyl%29adenosine tRNA methylthiotransferase	NA	1302	0	0	0	1	1	0	0	1		TTAAAAGTTTTATTTTCTTGTTTTTTTACAATTTTATCTAAAATTTCACTA
424033	'-'	1	1	887.02	62.54	6.5	2	Cj0459c	hypothetical protein	6	267	1	0	0	0	1	0	0	1		ATTATATCCTTAATAAGTTTAATTAAAAGTAAAATTTGCTAAAATTATAGA
424033	'-'	1	1	887.02	62.54	6.5	2	Cj0460	transcription elongation factor NusA	NA	1089	0	0	0	1	1	0	0	1		ATTATATCCTTAATAAGTTTAATTAAAAGTAAAATTTGCTAAAATTATAGA
424090	'+'	1	1	649.01	89.79	8.13	2	Cj0460	transcription elongation factor NusA	41	1089	1	0	0	0	1	0	0	1		TTTTAGCAAATTTTACTTTTAATTAAACTTATTAAGGATATAATTTTTATC
424090	'+'	1	1	649.01	89.79	8.13	2	Cj0459c	hypothetical protein	NA	267	0	0	0	1	1	0	0	1		TTTTAGCAAATTTTACTTTTAATTAAACTTATTAAGGATATAATTTTTATC
424130	'-'	1	1	4.44	10	8.51	2	Cj0459c	hypothetical protein	103	267	0	1	0	0	1	0	0	1		AAATTTTTTTCATTAGCAATAGATTCGATAATATCTGCTATCTTTTCCATA
424130	'-'	1	1	4.44	10	8.51	2	Cj0460	transcription elongation factor NusA	NA	1089	0	0	0	1	1	0	0	1		AAATTTTTTTCATTAGCAATAGATTCGATAATATCTGCTATCTTTTCCATA
425033	'-'	1	1	4.03	2.86	5.53	1	Cj0460	transcription elongation factor NusA	NA	1089	0	0	0	1	1	0	0	1		TTTTTTCCTATAGCTTTGCTTTTTTGTTCGCTATTTAAACTTACAATAGCT
425280	'-'	1	1	28.46	8.7	4.49	2	Cj0461c	putative MFS transport protein	NA	1188	0	0	1	0	1	0	0	1		ATAGGCTTGAGTTTAGAACTAATTACAGGCTTATTGGGTATGATTTTTATC
425280	'-'	1	1	28.46	8.7	4.49	2	Cj0460	transcription elongation factor NusA	NA	1089	0	0	0	1	1	0	0	1		ATAGGCTTGAGTTTAGAACTAATTACAGGCTTATTGGGTATGATTTTTATC
426422	'-'	1	1	60.61	13.67	8.93	2	Cj0461c	putative MFS transport protein	0	1188	1	0	0	0	1	0	0	1		ATTAAAATAATTATAGCATTTAAAATATAAATTATGCTATAGTTTCGCTTA
426422	'-'	1	1	60.61	13.67	8.93	2	Cj0462	hypothetical protein	NA	1047	0	0	0	1	1	0	0	1		ATTAAAATAATTATAGCATTTAAAATATAAATTATGCTATAGTTTCGCTTA
426448	'+'	1	1	18.11	3.04	12.16	2	Cj0462	hypothetical protein	48	1047	0	1	0	0	1	0	0	1		TTTTTAATAGTTCAATGTAATTCATAAGCGAAACTATAGCATAATTTATAT
426448	'+'	1	1	18.11	3.04	12.16	2	Cj0461c	putative MFS transport protein	NA	1188	0	0	0	1	1	0	0	1		TTTTTAATAGTTCAATGTAATTCATAAGCGAAACTATAGCATAATTTATAT
426470	'+'	1	1	108.07	5.36	3.26	2	Cj0462	hypothetical protein	26	1047	1	0	0	0	1	0	0	1		CATAAGCGAAACTATAGCATAATTTATATTTTAAATGCTATAATTATTTTA
426470	'+'	1	1	108.07	5.36	3.26	2	Cj0461c	putative MFS transport protein	NA	1188	0	0	0	1	1	0	0	1		CATAAGCGAAACTATAGCATAATTTATATTTTAAATGCTATAATTATTTTA
426628	'-'	1	1	4.95	5	6.63	2	Cj0461c	putative MFS transport protein	206	1188	0	1	0	0	1	0	0	1		AAAAGCGCAAAAAGAACAATCAATACAACAAACATTGGTATAATTAATATT
426628	'-'	1	1	4.95	5	6.63	2	Cj0462	hypothetical protein	NA	1047	0	0	0	1	1	0	0	1		AAAAGCGCAAAAAGAACAATCAATACAACAAACATTGGTATAATTAATATT
428946	'+'	1	1	6.5	>100	3.04	1	Cj0464	ATP-dependent DNA helicase RecG	NA	1824	0	0	1	0	1	0	0	0		ATCACTATAAAAAGCGTTAGTTCAAGAAAAAATCAACTTTTTGGTTTAGGT
429913	'-'	1	1	36.96	7.67	12.89	1	Cj0464	ATP-dependent DNA helicase RecG	NA	1824	0	0	0	1	1	0	0	1		TGTAATATCTTTTTTAAAAGGCATTTGTTTAATAAAGCTAAAATTTAAAAG
430270	'+'	1	1	1284.71	15.19	6.95	1	Cj0464	ATP-dependent DNA helicase RecG	NA	1824	0	0	1	0	1	0	0	0		CAGTGGTGGAAGTAGGTATTTCTTTGCCAAGATTGAGTATGATAGTGATTG
430652	'-'	1	0	14.78	1.78	1.59	2	Cj0465c	group III truncated haemoglobin	NA	384	0	0	1	0	1	0	0	1		TTTGGCTAAAACTTTTTGAAGAAAGTTTAAATATAGTTTATAATGAAGAAA
430652	'-'	1	0	14.78	1.78	1.59	2	Cj0464	ATP-dependent DNA helicase RecG	NA	1824	0	0	0	1	1	0	0	1		TTTGGCTAAAACTTTTTGAAGAAAGTTTAAATATAGTTTATAATGAAGAAA
430983	'-'	1	1	28.09	6.85	2.29	2	Cj0465c	group III truncated haemoglobin	28	384	1	0	0	0	1	0	0	1		TCTTAACTTATGTTAAATTTAATTTATCTTATTTTTGCTATATTAACGCCA
430983	'-'	1	1	28.09	6.85	2.29	2	Cj0466	transcriptional regulator	NA	597	0	0	0	1	1	0	0	1		TCTTAACTTATGTTAAATTTAATTTATCTTATTTTTGCTATATTAACGCCA
431001	'+'	1	1	4.8	2.44	2.5	2	Cj0466	transcriptional regulator	49	597	1	0	0	0	1	0	0	1		TTCATATAAGCCTTTCTTAAATGTTAATTTTATGGCGTTAATATAGCAAAA
431001	'+'	1	1	4.8	2.44	2.5	2	Cj0465c	group III truncated haemoglobin	NA	384	0	0	0	1	1	0	0	1		TTCATATAAGCCTTTCTTAAATGTTAATTTTATGGCGTTAATATAGCAAAA
431405	'+'	1	1	17.37	12.75	2.1	2	Cj0467	amino-acid ABC transporter integral membrane protein	257	702	0	1	0	0	1	0	0	0		TAAAGAATTCAATTTTTTACTTATCAGTTCACTTTTTGATAAAATTAAAAT
431405	'+'	1	1	17.37	12.75	2.1	2	Cj0466	transcriptional regulator	NA	597	0	0	1	0	1	0	0	0		TAAAGAATTCAATTTTTTACTTATCAGTTCACTTTTTGATAAAATTAAAAT
431604	'+'	1	1	6.28	2.06	2.06	2	Cj0467	amino-acid ABC transporter integral membrane protein	58	702	0	1	0	0	1	0	0	0		TTAAAAGAACTTAAAATTTCAGAACTTATTGATACAAAAAAAGGTAGAATT
431604	'+'	1	1	6.28	2.06	2.06	2	Cj0466	transcriptional regulator	NA	597	0	0	1	0	1	0	0	0		TTAAAAGAACTTAAAATTTCAGAACTTATTGATACAAAAAAAGGTAGAATT
431609	'+'	1	1	208.08	15.44	7.97	2	Cj0467	amino-acid ABC transporter integral membrane protein	53	702	1	0	0	0	1	0	0	0		AGAACTTAAAATTTCAGAACTTATTGATACAAAAAAAGGTAGAATTGAAAT
431609	'+'	1	1	208.08	15.44	7.97	2	Cj0466	transcriptional regulator	NA	597	0	0	1	0	1	0	0	0		AGAACTTAAAATTTCAGAACTTATTGATACAAAAAAAGGTAGAATTGAAAT
432771	'+'	1	1	47.31	>100	2.42	2	Cj0469	amino-acid ABC transporter ATP-binding protein	243	762	1	0	0	0	1	0	0	0		ATCTTTAGGTTTAAATACGGTGCAAAGTTTTGCTTATGTTATTATTCCACA
432771	'+'	1	1	47.31	>100	2.42	2	Cj0468	amino-acid ABC transporter integral membrane protein	NA	657	0	0	1	0	1	0	0	0		ATCTTTAGGTTTAAATACGGTGCAAAGTTTTGCTTATGTTATTATTCCACA
433753	'+'	1	1	44.35	3.79	4.62	2	Cjp06	tRNA-Thr	114	76	0	1	0	0	1	0	0	0		AAGCGAAAGAGCAAAGAAATTTTTAAATTTATTTGATTATCATAATATAGA
433753	'+'	1	1	44.35	3.79	4.62	2	Cj0469	amino-acid ABC transporter ATP-binding protein	NA	762	0	0	1	0	1	0	0	0		AAGCGAAAGAGCAAAGAAATTTTTAAATTTATTTGATTATCATAATATAGA
433857	'+'	1	1	272.02	6.94	6.48	1	Cjp06	tRNA-Thr	10	76	1	0	0	0	1	0	0	0		AAAAACTAAAAAAGTCTTGACAAAATTTTTTTTTTGAGTTATAATCTTACT
433867	'+'	1	1	354.87	3.09	5.11	1	Cjp06	tRNA-Thr	0	76	0	1	0	0	1	0	0	0		AAAGTCTTGACAAAATTTTTTTTTTGAGTTATAATCTTACTTTTATTTTTG
433992	'+'	1	1	64.31	8.91	3.45	1	Cjp07	tRNA-Tyr	0	86	1	0	0	0	1	0	0	0		ATTTATTTTAGCAGTGTTTGACCAGAATATTGAAAAAGCAATATTTTTATG
434084	'+'	1	1	821.84	4.72	6.62	1	Cjp08	tRNA-Gly	0	77	1	0	0	0	1	0	0	0		GCTGGCTTTCGCCTTCCGTGGTTCGAATCCACGACTCACCACCATGCTTTG
434265	'+'	1	1	249.83	6.13	2.47	1	Cjt1	tRNA-Thr	0	75	1	0	0	0	1	0	0	0		TCCCATTTAAGAGTTTTTGTTGTCTGTTATTGTGTATAATTTTTCTGAGCG
435699	'-'	1	1	4.44	5	8.29	1	Cj0470	elongation factor Tu	NA	1200	0	0	0	1	1	0	0	1		TAATTTTTCAGTAGTATTTTTACTATTTTTATAGGTGCTATAATTAATATC
435699	'-'	1	1	4.44	5	8.29	1	Cj0471	50S ribosomal protein L33	NA	159	0	0	0	1	1	0	0	1		TAATTTTTCAGTAGTATTTTTACTATTTTTATAGGTGCTATAATTAATATC
435831	'+'	1	1	642.54	11.67	25.67	1	Cjp09	tRNA-Trp	0	76	1	0	0	0	1	0	0	0		AACATACACTTCACAAAGAAGTTAAGCTAAAAAGTTAAGCTTGCGCCCTTA
437723	'+'	1	0	72.07	10.75	1.6	2	Cj0476	50S ribosomal protein L10	283	480	0	1	0	0	1	0	0	0		GTCTTGGTAAAGTAAGTTTTTCCAAAGAACAATTATGGGATAATGTTAGCA
437723	'+'	1	0	72.07	10.75	1.6	2	Cj0475	50S ribosomal protein L1	NA	702	0	0	1	0	1	0	0	0		GTCTTGGTAAAGTAAGTTTTTCCAAAGAACAATTATGGGATAATGTTAGCA
437888	'+'	1	1	3.1	6	2.21	1	Cj0476	50S ribosomal protein L10	118	480	0	1	0	0	1	0	0	0		TGCTTGATATGAAATAAGAGTTGCTTTTTTGCAACTCTTTTGTTTTAAAAT
437894	'+'	1	1	2002.46	25.18	7.89	1	Cj0476	50S ribosomal protein L10	112	480	1	0	0	0	1	0	0	0		ATATGAAATAAGAGTTGCTTTTTTGCAACTCTTTTGTTTTAAAATAAACAT
439760	'+'	1	0	10.72	3.64	1.01	1	Cj0478	DNA-directed RNA polymerase subunit beta	NA	4137	0	0	1	0	1	0	0	0		TTTTAACAGAATTTAATCCAAATGATTTTATGGATAGAATAGAATATGATA
441106	'+'	1	1	18.58	1.7	2.14	1	Cj0478	DNA-directed RNA polymerase subunit beta	NA	4137	0	0	1	0	1	0	0	0		GATGATGCAAACAGAGCGCTAATGGGTTCAAACATGCAACGTCAAGCTGTG
442211	'+'	1	0	18.48	2.11	1.66	1	Cj0478	DNA-directed RNA polymerase subunit beta	NA	4137	0	0	1	0	1	0	0	0		AACACGATGAAAAGCTTGAAATTTTAGAAAAAGATGATATTTTACCAAGTG
445327	'+'	1	0	11.46	5.62	0.87	1	Cj0479	DNA-directed RNA polymerase subunit beta%27	NA	4554	0	0	1	0	1	0	0	0		TATTTATATGATGGCAGATTCTGGTGCTAGGGGTAGTGCAGCTCAAATTTC
446900	'-'	1	1	92.77	23.25	8.73	1	Cj0479	DNA-directed RNA polymerase subunit beta%27	NA	4554	0	0	0	1	1	0	0	1		ATATCCTTTGATTTAGCTGCTGCTTTTGGAGTTTTTGCTAAAATATCTGCT
447837	'+'	1	1	14.04	>100	22.12	1	Cj0480c	putative transcriptional regulator	NA	762	0	0	0	1	1	0	0	1		TTTTTTTCTCTAAAAGCTTTATTAGAGCAATAAATTAGATAAGATATACTA
448661	'+'	1	1	93.14	11.96	3.45	1	Cj0481	putative dihydrodipicolinate synthase	36	909	1	0	0	0	1	0	0	0		ACCAAGTTAACAGCTTGATTTTTTTACAAATATTTTGTTATATTTTTTGTA
451479	'+'	1	1	3.7	>100	5.67	1	Cj0484	putative MFS transport protein	NA	1233	0	0	1	0	1	0	0	0		TATTTTATACCTTAGTTATTTTTTCCCAGCTATATATCGATCTAAGGCTTA
451542	'-'	1	1	5.17	15	4.97	1	Cj0484	putative MFS transport protein	NA	1233	0	0	0	1	1	0	0	1		AAAACATCCATTGCCAATTTTTAAAATATATATTTGGTGTATAATCAAGTA
456891	'+'	1	1	4.34	2.56	7.63	1	Cj0490	putative aldehyde dehydrogenase C-terminus	NA	1182	0	0	1	0	1	0	0	0		TTGAAGAATATTTAGCTACCCATGTGGTATATTTGCAGTATAATACTAATA
457123	'+'	1	1	15.52	3.1	5.86	1	Cj0491	30S ribosomal protein S12	104	387	0	1	0	0	1	0	0	0		AATTAGTTTATGTTTTATAAATATTAATGTAAATTATGTAGGTTTATTTTA
457196	'+'	1	1	1765.55	>100	16.91	1	Cj0491	30S ribosomal protein S12	31	387	1	0	0	0	1	0	0	0		AATTATTTCTAGTTTATATTTTTGTAAGTAAATTTTAGATATCATCCAAAG
460270	'+'	1	1	233.79	86.6	5.29	1	Cjp10	tRNA-Arg	0	77	1	0	0	0	1	0	0	0		CATCAAAAAAAGAAACGGTTAAATTTTTAGCGGGATTTTTCCCGCTTTCTG
460459	'+'	1	1	3.7	3	2.13	2	Cj0495	putative methyltransferase domain protein	60	702	1	0	0	0	1	0	0	0		GCAGCACAAAGCCCAGTAAATTTTAAAGAAGATAATAATATAACAAAAGAA
460459	'+'	1	1	3.7	3	2.13	2	Cj0494	putative exporting protein	NA	150	0	0	1	0	1	0	0	0		GCAGCACAAAGCCCAGTAAATTTTAAAGAAGATAATAATATAACAAAAGAA
460575	'-'	1	1	9.98	10	18.24	1	Cj0494	putative exporting protein	NA	150	0	0	0	1	1	0	0	1		ACAGCGCCTTTAATTCCTTGTTTTAAAATAAAATCAGCTAAAATTAAAGAA
460575	'-'	1	1	9.98	10	18.24	1	Cj0495	putative methyltransferase domain protein	NA	702	0	0	0	1	1	0	0	1		ACAGCGCCTTTAATTCCTTGTTTTAAAATAAAATCAGCTAAAATTAAAGAA
461220	'+'	1	1	142.29	>100	2.22	1	Cj0495	putative methyltransferase domain protein	NA	702	0	0	1	0	1	0	0	0		CAAATGCAAGAAATTCACTTAAGATTTAGGTTAAAAAGTTATGATATTTGA
461220	'+'	1	1	142.29	>100	2.22	1	Cj0496	hypothetical protein	NA	375	0	0	1	0	1	0	0	0		CAAATGCAAGAAATTCACTTAAGATTTAGGTTAAAAAGTTATGATATTTGA
464001	'-'	1	1	4.34	3.5	33.15	1	Cj0499	putative histidine triad %28HIT%29 family protein	NA	486	0	0	0	1	1	0	0	1		ATTAGTGCCACAAACCCTAGTTTCTCCTATGGTTGTGATAAAATTTGTATC
464001	'-'	1	1	4.34	3.5	33.15	1	Cj0500	tRNA 2-selenouridine synthase	NA	999	0	0	0	1	1	0	0	1		ATTAGTGCCACAAACCCTAGTTTCTCCTATGGTTGTGATAAAATTTGTATC
464986	'+'	1	1	2.96	5	2.9	1	Cj0500	tRNA 2-selenouridine synthase	NA	999	0	0	1	0	1	0	0	0		GAAAAGAATGGCAAAAGCTTATTGTTATGCTTTTGGAGTATTATGATAAAA
465345	'+'	1	1	124.92	>100	5.11	1	Cj0501	pseudo	31	1223	1	0	0	0	1	0	0	0		ATATTTCTTAAATTTATATTTTTTTAAATCATTTTAAATATAATTATCTCG
466918	'+'	1	1	14.78	41	5.59	1	Cj0503c	ferrochelatase	NA	912	0	0	0	1	1	0	0	1		TCAAGCCATTTTACAGGGCCTAGTTTAGACTGATAAGCTAAAATAAATTCA
467087	'+'	1	1	10.35	3	33.15	1	Cj0503c	ferrochelatase	NA	912	0	0	0	1	1	0	0	1		TTTTGGCATCAAATTTACTTTTTTTAGCCAAAATGTGCGAAACTATCATCT
469598	'+'	1	1	1502.03	24.91	10.65	2	Cj0506	alanyl-tRNA synthetase	29	2529	1	0	0	0	1	0	0	1		TTTATTGTATTTTAGTTTTACTTAATTTAAAGTAATTTTGGTATGATATGT
469598	'+'	1	1	1502.03	24.91	10.65	2	Cj0505c	putative DegT family aminotransferase	NA	1074	0	0	0	1	1	0	0	1		TTTATTGTATTTTAGTTTTACTTAATTTAAAGTAATTTTGGTATGATATGT
472457	'-'	1	1	21.44	55	13.03	1	Cj0507	Maf-like protein	NA	552	0	0	0	1	1	0	0	1		AAAACTCTTTTTTCAGGTTTTACAAGCAAAAAAGCCGATAAAATACTTGCA
473572	'-'	1	1	7.02	>100	21.56	1	Cj0508	penicillin-binding protein	NA	1932	0	0	0	1	1	0	0	1		ACTATCTCATCATAACCAAATTTTAAAGCATTCTGTGCCATATTTTGAACA
474561	'-'	1	1	8.5	8.67	20.72	1	Cj0508	penicillin-binding protein	NA	1932	0	0	0	1	1	0	0	1		TAAATTTCATATTTGCTTTTGGTAATGGTGATTTGGTGGTATAATAAGCAC
474949	'-'	1	1	22.55	28	5.27	1	Cj0509c	ATP-dependent Clp protease ATP-binding subunit	NA	2574	0	0	1	0	1	0	0	0		ATTTCTTTAAACCTGAGTTTTTAAACCGTTTAGATGATATTATCACCTTTA
476292	'+'	1	1	35.11	2.04	8.13	1	Cj0509c	ATP-dependent Clp protease ATP-binding subunit	NA	2574	0	0	0	1	1	0	0	1		GGCGTTGCAAGGCTGCATCTTTTTCAAAATATTTACGATATTCTTTTAAAG
477260	'-'	1	1	72.07	18.71	5.15	1	Cj0509c	ATP-dependent Clp protease ATP-binding subunit	25	2574	1	0	0	0	1	0	0	0		TTTACTCAATTAACTTGACATTATATGACTAAAGTTATATAATAGCAAGTC
477737	'+'	1	1	429.47	11.37	9.27	2	Cj0511	putative secreted protease	18	1335	1	0	0	0	1	0	0	1		AGAATTTAAATTTATTTACGAATTTTTAAGCAATTTTTATTAAAATTTACT
477737	'+'	1	1	429.47	11.37	9.27	2	Cj0510c	hypothetical protein	NA	291	0	0	0	1	1	0	0	1		AGAATTTAAATTTATTTACGAATTTTTAAGCAATTTTTATTAAAATTTACT
482978	'+'	1	1	89.07	>100	5.97	1	Cj0518	heat shock protein 90	25	1827	1	0	0	0	1	0	0	0		ATAAATCTTTAAATTTACTTTAGAATTTGTATTTTTTGCTAAAATACCACT
483821	'+'	1	1	10.35	10.33	5.02	1	Cj0518	heat shock protein 90	NA	1827	0	0	1	0	1	0	0	0		TTACTTTATCTTCACACTAAAAGTGAAGGAAAATTAGAATACAATTCTTTA
484408	'+'	1	1	8.5	5.6	2.12	1	Cj0518	heat shock protein 90	NA	1827	0	0	1	0	1	0	0	0		CATGGACGATGAGATTGATTCTTTAGTAACTCCTATGCTAGAATTTGAAGG
485766	'-'	1	1	3.72	>100	19.89	1	Cj0522	putative Na%2B%2FPi cotransporter protein	NA	504	0	0	0	1	1	0	0	1		AAAAGTATACTTTTTATCTTTGTATCAGTTGACTTTACTAAAATTTTTTCA
487985	'+'	1	1	4.34	>100	11.6	1	Cj0525c	putative penicillin-binding protein	NA	1809	0	0	0	1	1	0	0	1		CTTTTTTCGCCAAATTTAAATATTTTAAGTCCTGATACGATTTCTATATTG
488992	'+'	1	1	4.07	>100	8.51	1	Cj0525c	putative penicillin-binding protein	NA	1809	0	0	0	1	1	0	0	1		AATTTGTTTAGAACTTGTGATAGTAAAATTATCTTTGGTTATAATCGATCC
489937	'-'	1	1	478.25	>100	4.05	1	Cj0527c	flagellar basal body rod protein FlgC	NA	495	0	0	1	0	1	0	0	0		TTGATGCAAGCTCTAAATTAAGTTAAAGGTAAATTATGGCATACTTAAGTG
489961	'+'	1	1	9.24	>100	>100	1	Cj0527c	flagellar basal body rod protein FlgC	NA	495	0	0	0	1	1	0	0	1		TAAACCATAACCACTAATATCAAAATCACTTAAGTATGCCATAATTTACCT
489961	'+'	1	1	9.24	>100	>100	1	Cj0528c	flagellar basal body rod protein FlgB	NA	432	0	0	0	1	1	0	0	1		TAAACCATAACCACTAATATCAAAATCACTTAAGTATGCCATAATTTACCT
490416	'-'	1	0	43.61	1.67	1.48	1	Cj0528c	flagellar basal body rod protein FlgB	23	432	1	0	0	0	1	0	0	0		TATTTTTATACAAAATAGTTAAATTGGAACAGTATTTGCTTGTTAATATTA
491292	'+'	1	1	197.36	2.17	4.59	2	Cj0530	putative periplasmic protein	98	2571	1	0	0	0	1	0	0	1		AATATTACTCATCTGATATTTATTTTGCTTTAAATATGTTATAATTTGAGA
491292	'+'	1	1	197.36	2.17	4.59	2	Cj0529c	putative aminodeoxychorismate lyase family protein	NA	1002	0	0	0	1	1	0	0	1		AATATTACTCATCTGATATTTATTTTGCTTTAAATATGTTATAATTTGAGA
491505	'-'	1	1	172.23	>100	3.98	2	Cj0529c	putative aminodeoxychorismate lyase family protein	30	1002	1	0	0	0	1	0	0	1		TTTTTGCTCGTACAATTAATTTTTTATCTAATTTAATATATAATTGTTCCA
491505	'-'	1	1	172.23	>100	3.98	2	Cj0530	putative periplasmic protein	NA	2571	0	0	0	1	1	0	0	1		TTTTTGCTCGTACAATTAATTTTTTATCTAATTTAATATATAATTGTTCCA
491629	'-'	1	1	4.8	3.6	9.95	2	Cj0529c	putative aminodeoxychorismate lyase family protein	154	1002	0	1	0	0	1	0	0	1		TCTTTAACAAAAGTATATAGATATTTTAAATTTTTTGTTATTTTTAAAATC
491629	'-'	1	1	4.8	3.6	9.95	2	Cj0530	putative periplasmic protein	NA	2571	0	0	0	1	1	0	0	1		TCTTTAACAAAAGTATATAGATATTTTAAATTTTTTGTTATTTTTAAAATC
492078	'-'	1	1	4.07	12	4.54	1	Cj0530	putative periplasmic protein	NA	2571	0	0	0	1	1	0	0	1		TAGTAAAATCTATAAAGCCCTGCAAATAATCTAAATGATAAAATTCTCCCT
493921	'-'	1	1	4.07	>100	>100	1	Cj0530	putative periplasmic protein	NA	2571	0	0	0	1	1	0	0	1		TTTAAATATTTTTAATTAAGTAAATTAGCAGGAAGTTGTATGATATTTTTA
494042	'+'	1	1	188.49	>100	7.3	1	Cj0531	isocitrate dehydrogenase	35	2205	0	1	0	0	1	0	0	0		AAACTTTAAACTTACTCTTGCATTTTTTTTTATTTGTAATATACTTAAAAA
499058	'+'	1	1	447.21	2.94	5.63	2	Cj0535	2-oxoglutarate-acceptor oxidoreductase subunit OorD	180	312	1	0	0	0	1	0	0	0		GCTAAATTTATTAAAGAAAATATTAGCAAACCTGTGGTAGCATTCATTGCA
499058	'+'	1	1	447.21	2.94	5.63	2	Cj0534	succinyl-coA synthetase alpha chain	NA	870	0	0	1	0	1	0	0	0		GCTAAATTTATTAAAGAAAATATTAGCAAACCTGTGGTAGCATTCATTGCA
502175	'-'	1	1	14.04	8	13.9	1	Cj0538	2-oxoglutarate-acceptor oxidoreductase subunit OorC	NA	558	0	0	0	1	1	0	0	1		TCCATTAATTTTCCTTGAAAATATAAGTTTTTGATTATAAAATTTTAATCG
502175	'-'	1	1	14.04	8	13.9	1	Cj0539	hypothetical protein	NA	264	0	0	0	1	1	0	0	1		TCCATTAATTTTCCTTGAAAATATAAGTTTTTGATTATAAAATTTTAATCG
502198	'+'	1	1	1107.67	>100	5.41	1	Cj0539	hypothetical protein	23	264	1	0	0	0	1	0	0	0		TAATTATTTTAATTTAGCTACTTTTAACGATTAAAATTTTATAATCAAAAA
502843	'+'	1	1	18.85	7.33	2.56	2	Cj0541	polyprenyl synthetase	194	894	1	0	0	0	1	0	0	0		CATATTGATAGAGCAAGACTTATTTTAGAATTTAGTGGTTATAATAAAGGT
502843	'+'	1	1	18.85	7.33	2.56	2	Cj0540	putative exporting protein	NA	537	0	0	1	0	1	0	0	0		CATATTGATAGAGCAAGACTTATTTTAGAATTTAGTGGTTATAATAAAGGT
504163	'-'	1	1	8.13	>100	24.96	1	Cj0542	glutamyl-tRNA reductase	NA	1299	0	0	0	1	1	0	0	1		ATTGCTCCACTATCTTCAAAAATATCAGCTTTTTCAAGTAAAATATCTTTA
505118	'+'	1	0	5.91	1.78	1.72	2	Cj0543	prolyl-tRNA synthetase	94	1710	1	0	0	0	1	0	0	0		TACACACGCCTACTGTAAATTTGAAACATTTACAAGGTAAAATGCAAAGCG
505118	'+'	1	0	5.91	1.78	1.72	2	Cj0542	glutamyl-tRNA reductase	NA	1299	0	0	1	0	1	0	0	0		TACACACGCCTACTGTAAATTTGAAACATTTACAAGGTAAAATGCAAAGCG
507041	'+'	1	1	8.13	2.26	2.24	2	Cj0545	porphobilinogen deaminase	263	924	1	0	0	0	1	0	0	0		TTGGTTTTGGTAATTTTTTATTTTTCATACTTTTGAGTATGATTTTTGGTG
507041	'+'	1	1	8.13	2.26	2.24	2	Cj0544	putative integral memnbrane protein	NA	390	0	0	1	0	1	0	0	0		TTGGTTTTGGTAATTTTTTATTTTTCATACTTTTGAGTATGATTTTTGGTG
507097	'-'	1	1	12.94	9	6.65	1	Cj0544	putative integral memnbrane protein	NA	390	0	0	0	1	1	0	0	1		ATAAGCAAAAACCCTGCGATAACAAAAGAAAATTGTGTTAACATATCCTTT
509288	'-'	1	1	7.76	5	6.22	1	Cj0546	putative 3-octaprenyl-4-hydroxybenzoate carboxy-lyase	NA	1803	0	0	0	1	1	0	0	1		TGTTGCGCATGAGCGGGATATTTTGCATCGATTTTTGCTAAGATAAGATTA
509334	'-'	1	1	1.85	>100	4.14	1	Cj0546	putative 3-octaprenyl-4-hydroxybenzoate carboxy-lyase	NA	1803	0	0	0	1	1	0	0	1		CTTAACAAAACTCATTTGCCCTACTCCCCAAAATGCATGCATAATTTGTTG
509445	'-'	1	1	11.09	>100	4.86	1	Cj0546	putative 3-octaprenyl-4-hydroxybenzoate carboxy-lyase	NA	1803	0	0	0	1	1	0	0	1		AATTCCTTCTGAAATTAAAATTTTCTTTGTATTAAAACGATCTAACATATA
510082	'+'	1	1	131.58	1.89	5.53	1	Cj0547	flagellar protein FlaG	102	366	0	1	0	0	1	0	0	0		TTGAGATTTATTTTAAAATTTTGGCACAGTTTTTGCTTATTATTTTTTTTA
510149	'+'	1	1	1242.57	8.37	4.51	1	Cj0547	flagellar protein FlaG	35	366	1	0	0	0	1	0	0	0		TTTTCTTTATAAGTGTTCATAAATTTATAAATTTGTCGATATAAGCTTTTA
512357	'-'	1	1	2.22	3	>100	1	Cj0548	flagellar capping protein	NA	1929	0	0	0	1	1	0	0	1		ATACTCTCATATTGCAACCATTGATTCGCCATTGTATCATATCTTGTATCA
513454	'-'	1	0	4245.12	2.74	1.85	1	rnpB	rnpB	1	317	1	0	0	0	1	0	0	0		AATTATTTTATTTGATGAAAAAATAAGTAAAATTACGTTAAAATCCAAATT
513458	'-'	1	1	22.18	2.38	3.35	1	rnpB	rnpB	5	317	0	1	0	0	1	0	0	0		ATAAAATTATTTTATTTGATGAAAAAATAAGTAAAATTACGTTAAAATCCA
513500	'-'	1	1	11.83	17	6.43	2	rnpB	rnpB	47	317	0	1	0	0	1	0	0	1		AAAAATAAAAAACAATTTTATCAAATTTTGATTGATATCACAATAAAATTA
513500	'-'	1	1	11.83	17	6.43	2	Cj0551	elongation factor P	NA	570	0	0	0	1	1	0	0	1		AAAAATAAAAAACAATTTTATCAAATTTTGATTGATATCACAATAAAATTA
514272	'+'	1	1	3959.46	>100	5.89	1	Cj0552	hypothetical protein	23	693	1	0	0	0	1	0	0	0		AAAATATTTTTTTAAACTTTTCTTCAATTTAAAATTTCTATAATATTTCTA
515396	'+'	1	1	38.44	35.67	2.21	1	Cj0553	putative integral membrane protein	NA	954	0	0	1	0	1	0	0	0		GAAAATAAAAATGCTACATTGATGGCTTTGATTATAGGTATAATTATTTCT
516406	'+'	1	0	14.78	11	1.25	1	Cj0554	hypothetical protein	NA	1005	0	0	1	0	1	0	0	0		AGCTGATTTCTTTGTTAAAGAATTTAAGGAGTTTTTACCTAAGATGGATTA
516417	'+'	1	1	20.7	2.04	2.66	1	Cj0554	hypothetical protein	NA	1005	0	0	1	0	1	0	0	0		TTGTTAAAGAATTTAAGGAGTTTTTACCTAAGATGGATTATCCTATACGAG
516926	'-'	1	1	15.89	>100	6.33	1	Cj0554	hypothetical protein	NA	1005	0	0	0	1	1	0	0	1		ATTTAGCAACAAATTTACTCATCTTATGAAATTTTTTATAAAATATCCACA
517043	'+'	1	1	20.33	19.33	4.11	1	Cj0555	putative dicarboxylate carrier protein MatC	17	1293	0	1	0	0	1	0	0	0		TAGATTTTGTTTTTATGCTTTGAAAAATATATTTTTTGATATTATAAGCCC
517455	'+'	1	1	12.57	4.09	2.04	1	Cj0555	putative dicarboxylate carrier protein MatC	NA	1293	0	0	1	0	1	0	0	0		TTAGCTTTTATGGCACCACTTACTTTTTTACTTTGCGATAAAATCGGTTTA
520621	'+'	1	0	7.12	>100	1.73	1	Cj0558c	gamma-glutamyl phosphate reductase	NA	1233	0	0	0	1	1	0	0	1		TATTTTCATTTGCTTTAAAAATTTTTAAATTTGAGTTGTTAAAATAAGCCA
520887	'+'	1	1	8.36	4.86	3.76	1	Cj0558c	gamma-glutamyl phosphate reductase	NA	1233	0	0	0	1	1	0	0	1		TTAATGAGAGGAATTTTGGTATTGTTTGCAATTTCTTGTATCATATTTGAA
521498	'-'	1	1	17.03	>100	2.22	2	Cj0558c	gamma-glutamyl phosphate reductase	27	1233	1	0	0	0	1	0	0	1		TTTTCATTTATATTTACCTTTCAATTCTAAATTTTTTTGTATAATTTATCA
521498	'-'	1	1	17.03	>100	2.22	2	Cj0559	putative pyridine nucleotide-disulphide oxidoreductase	NA	936	0	0	0	1	1	0	0	1		TTTTCATTTATATTTACCTTTCAATTCTAAATTTTTTTGTATAATTTATCA
522337	'+'	1	1	36.22	2.78	2.4	1	Cj0559	putative pyridine nucleotide-disulphide oxidoreductase	NA	936	0	0	1	0	1	0	0	0		GTGGTTCTACTCCACTTGATTTTTTACAAAAATGTGGGATTAATGTTGATG
523158	'-'	1	1	5.17	>100	7.46	1	Cj0560	putative MATE family transport protein	NA	1329	0	0	0	1	1	0	0	1		ACTATAAAAATATAATCAAGCACTATATTGCTTAATGCTATAATCACATTC
524398	'+'	1	1	16.26	7.29	11.57	1	Cj0561c	putative periplasmic protein	NA	930	0	0	0	1	1	0	0	1		CATCATTGTAATCATAATTTAACCCTAGGTTTAATAAGCTATAATTATAGT
524727	'-'	1	1	3.72	13	2.5	1	Cj0561c	putative periplasmic protein	NA	930	0	0	1	0	1	0	0	0		TCCTCTTTCATTCCTTTTATCGGTGCAGAACTTTACTATGGTAATCTTATA
525005	'-'	1	1	36.96	26	13.11	1	Cj0561c	putative periplasmic protein	42	930	1	0	0	0	1	0	0	0		AAACTTAATTTTTTTATAAATATTTAATGTAATATTAGTTACAATTATAAA
525089	'+'	1	1	567.33	67.74	3.32	1	Cj0562	replicative DNA helicase	28	1377	1	0	0	0	1	0	0	0		ATAAAAAAATTAAGTTTTATAATTTAAGTTTTTTTAGATAGAATTTTTAGA
525695	'+'	1	1	19.82	7	3.36	1	Cj0562	replicative DNA helicase	NA	1377	0	0	1	0	1	0	0	0		GGTCTAAATAAAATGACAAAAGGCTTTAAAGGGGGTGAACTTATAATAATC
526653	'-'	1	1	8.13	>100	24.96	1	Cj0563	hypothetical protein	NA	603	0	0	0	1	1	0	0	1		GTGTATCAAATTTTCTTTCTGGCTTGGATAATTTTTCGTATAATTTTTTTA
527303	'+'	1	1	9.98	2	10.78	2	Cj0565	pseudo	133	728	0	1	0	0	1	0	0	0		GATACTTATTTTTCTTTCTATGCAACCTTATCCTTATAATATAATATTTTG
527303	'+'	1	1	9.98	2	10.78	2	Cj0564	putative integral membrane protein	NA	207	0	0	1	0	1	0	0	0		GATACTTATTTTTCTTTCTATGCAACCTTATCCTTATAATATAATATTTTG
527407	'+'	1	1	182.58	>100	9.04	1	Cj0565	pseudo	29	728	1	0	0	0	1	0	0	0		AATTTCACTTCCCCCTTGACTGGGGGGGGGGGGATTTGATAAAATACAAAG
528700	'-'	1	1	266.48	9.9	6.73	1	Cj0566	hypothetical protein	NA	1467	0	0	0	1	1	0	0	1		CCGTATTGATCTAATATTATTTTAATGATAACTTTTATATAGTTTTCTTTA
528990	'+'	1	1	5.91	>100	3.08	1	Cj0566	hypothetical protein	NA	1467	0	0	1	0	1	0	0	0		AGACTTAATTGATATAGATTTTGAAGATAATAAAATTTATAATTTTTTGTA
530520	'+'	1	1	5.54	>100	14.92	1	Cj0569	hypothetical protein	NA	870	0	0	1	0	1	0	0	0		TACAAATACTTTTGAATTACAAGGGGGAAATTTTATTGCTAAAATATTTTG
530783	'-'	1	1	21.07	2.97	11.13	1	Cj0569	hypothetical protein	NA	870	0	0	0	1	1	0	0	1		GTTATCTTTTGGTATACATTCTTTCCATTCTTTTTTGTGGTAAAATTTAGC
531001	'-'	1	1	15.79	2.46	3.48	1	Cj0569	hypothetical protein	NA	870	0	0	0	1	1	0	0	1		TTTTCTAATTTTTTATTATCTATTTTTCCATTATTATATAATATATAAATT
531009	'-'	1	1	5.17	15	3.94	1	Cj0569	hypothetical protein	NA	870	0	0	0	1	1	0	0	1		CTAGATATTTTTCTAATTTTTTATTATCTATTTTTCCATTATTATATAATA
532938	'+'	1	1	11.46	>100	16.58	1	Cj0571	putative transcriptional regulator	NA	873	0	0	1	0	1	0	0	0		TAAGCAATTATCAAATCATTGATAAAGATGAAACAAGCTATACTTTAAGCA
533172	'-'	1	1	420.83	43.47	2.48	2	Cjp12	tRNA-Met	0	76	1	0	0	0	1	0	0	1		TCCCTTTACCCCATCCACTTCTTATTTTATATTTCAAAGATCTTATATGCC
533172	'-'	1	1	420.83	43.47	2.48	2	Cj0571	putative transcriptional regulator	NA	873	0	0	0	1	1	0	0	1		TCCCTTTACCCCATCCACTTCTTATTTTATATTTCAAAGATCTTATATGCC
533280	'-'	1	1	270.17	3.2	2.03	2	Cjp13	tRNA-Gln	0	75	1	0	0	0	1	0	0	1		TGACAAATAAATTAAAATTCATTATAATCACACTTTTAAAAAATATTTATT
533280	'-'	1	1	270.17	3.2	2.03	2	Cj0572	bifunctional 3%2C4-dihydroxy-2-butanone 4-phosphate synthase%2FGTP cyclohydrolase II protein	NA	1020	0	0	0	1	1	0	0	1		TGACAAATAAATTAAAATTCATTATAATCACACTTTTAAAAAATATTTATT
533298	'-'	1	1	72.81	1.8	6.57	2	Cjp13	tRNA-Gln	18	75	0	1	0	0	1	0	0	1		ATTATAACTTAAATTGCTTGACAAATAAATTAAAATTCATTATAATCACAC
533298	'-'	1	1	72.81	1.8	6.57	2	Cj0572	bifunctional 3%2C4-dihydroxy-2-butanone 4-phosphate synthase%2FGTP cyclohydrolase II protein	NA	1020	0	0	0	1	1	0	0	1		ATTATAACTTAAATTGCTTGACAAATAAATTAAAATTCATTATAATCACAC
533951	'-'	1	1	3.33	>100	5.11	1	Cj0572	bifunctional 3%2C4-dihydroxy-2-butanone 4-phosphate synthase%2FGTP cyclohydrolase II protein	NA	1020	0	0	0	1	1	0	0	1		TTTTCTTCAAGCTTAATAAGGCTTTCATGTTTTAGGCGATATTCTATAAGA
534934	'+'	1	1	7.02	3.11	2.65	1	Cj0574	acetolactate synthase 3 catalytic subunit	NA	1701	0	0	1	0	1	0	0	0		CGGCAATGATTTGCGAGGCTTTAAAAGAAGAAAATGTTAAAATTGTTTTTG
535114	'+'	1	0	3.33	10	1.46	1	Cj0574	acetolactate synthase 3 catalytic subunit	NA	1701	0	0	1	0	1	0	0	0		AAGTGGGCGTAGCTATAGTTACAAGCGGACCAGGTTTTACAAATACTATTA
535931	'+'	1	1	42.87	3.52	4.84	1	Cj0574	acetolactate synthase 3 catalytic subunit	NA	1701	0	0	1	0	1	0	0	0		CACAACTTTTAAAGAATGGCATGAAACTTTAAAGCGTTATAATGAACTTTA
536655	'+'	1	1	11.83	5.57	7.7	1	Cj0575	acetolactate synthase 3 regulatory subunit	NA	465	0	0	1	0	1	0	0	0		TTTTATCTCGTATAGTAGGACTTTTTTCAGGAAGAGGTTATAATATTGACT
536895	'+'	1	1	21.81	3.9	2.81	2	Cj0576	UDP-3-O-%5B3-hydroxymyristoyl%5D glucosamine N-acyltransferase	128	966	1	0	0	0	1	0	0	0		TAGGTGGACTTGATGCCGTTTTGAAAGCTTATAATGGTACTATTGCAAATA
536895	'+'	1	1	21.81	3.9	2.81	2	Cj0575	acetolactate synthase 3 regulatory subunit	NA	465	0	0	1	0	1	0	0	0		TAGGTGGACTTGATGCCGTTTTGAAAGCTTATAATGGTACTATTGCAAATA
537481	'-'	1	1	8.5	>100	13.05	1	Cj0576	UDP-3-O-%5B3-hydroxymyristoyl%5D glucosamine N-acyltransferase	NA	966	0	0	0	1	1	0	0	1		CCTATTACACAATTAGCAAGCAGATGACATTTTTTACCGATTTTAGTATCA
538212	'+'	1	1	23.65	>100	6.81	1	Cj0577c	S-adenosylmethionine:tRNA ribosyltransferase-isomerase	NA	1029	0	0	0	1	1	0	0	1		AAAAAAGATCACAAAAACCATTTTTTGTTTTAGTTCTTGTATAATATTCTA
540173	'-'	1	1	100.16	3.34	3.65	1	Cj0579c	sec-independent translocase	29	417	1	0	0	0	1	0	0	0		TGCTTTATATCTCTCATCTTAAATTTAAGTTTTTTAAGTAAAATATTTATT
541348	'+'	1	1	2196.49	10.32	6.44	2	Cj0581	dinucleoside polyphosphate hydrolase	23	471	1	0	0	0	1	0	0	1		TTTAATGTATTTTAATAAAAATTTGATTTGATTTAGGTTAAAATTATATCC
541348	'+'	1	1	2196.49	10.32	6.44	2	Cj0580c	coproporphyrinogen III oxidase	NA	1068	0	0	0	1	1	0	0	1		TTTAATGTATTTTAATAAAAATTTGATTTGATTTAGGTTAAAATTATATCC
543102	'+'	1	1	454.23	7.9	6.43	1	Cj0583	hypothetical protein	NA	537	0	0	1	0	1	0	0	0		GATTTTTTAAGTTTTACTCTTGAAAATATTCGCAATGGCGGAGCTTTTATG
549090	'+'	1	0	4.44	7	1.06	1	Cj0589	bifunctional riboflavin kinase%2FFMN adenylyltransferase	NA	855	0	0	1	0	1	0	0	0		TTGTTTTGATGGTATGCATTTAGGACATCTAAAACTTGTAAAATGTTTAGA
549981	'+'	1	1	69.11	13.81	5.39	1	Cj0590	putative SAM-dependent methyltransferase	NA	711	0	0	1	0	1	0	0	0		ATAGAGAAAATTTAGAACTTTGTGGCAATTTATTGGCTAAAATTTTACCTA
550169	'+'	1	1	8.5	24	3.03	1	Cj0590	putative SAM-dependent methyltransferase	NA	711	0	0	1	0	1	0	0	0		GCTTATGGGCTTGATATAAGTTTTTTTGAAGCTAATTTATGCGAATTTGAT
550859	'+'	1	1	3.33	>100	>100	1	Cj0592c	putative periplasmic protein	NA	435	0	0	0	1	1	0	0	1		GGAAGGATAAATTTCAGAAGGTGTTTCTGCTATAGGTGGTATTATAATACT
551663	'+'	1	1	2.22	>100	9.95	1	Cj0593c	putative integral membrane protein	NA	633	0	0	0	1	1	0	0	1		GCGCGGAATTTTTGTGGCTACAAGGGCGCAAAAACAGATTAAAATAATATA
551874	'-'	1	0	7.02	>100	1.5	1	Cj0593c	putative integral membrane protein	7	633	1	0	0	0	1	0	0	0		ATGATGAAAATATTAAACAGTATCAAATAAATTGTGATAAATTTTAAGGTA
553151	'-'	1	1	273.5	7.33	8.95	2	Cj0595c	endonuclease III	0	627	1	0	0	0	1	0	0	1		AATCAATTATATCTAAACTTGGTTTAAAGCTAATTAACTAAAATTAAAAAA
553151	'-'	1	1	273.5	7.33	8.95	2	Cj0596	major antigenic peptide PEB-cell binding factor	NA	822	0	0	0	1	1	0	0	1		AATCAATTATATCTAAACTTGGTTTAAAGCTAATTAACTAAAATTAAAAAA
553204	'+'	1	1	838.61	2.57	4.55	2	Cj0596	major antigenic peptide PEB-cell binding factor	28	822	1	0	0	0	1	0	0	1		TTTAATTTTAGTTAATTAGCTTTAAACCAAGTTTAGATATAATTGATTTTA
553204	'+'	1	1	838.61	2.57	4.55	2	Cj0595c	endonuclease III	NA	627	0	0	0	1	1	0	0	1		TTTAATTTTAGTTAATTAGCTTTAAACCAAGTTTAGATATAATTGATTTTA
556767	'+'	1	0	3.33	4	1.31	1	Cj0599	putative OmpA family membrane protein	NA	954	0	0	1	0	1	0	0	0		CTGTTTGTTTTTATTTTGCTAATAGGTGCTATTGTTGTAAAATATGTTTTA
557005	'+'	1	0	4.03	4.33	1.28	1	Cj0599	putative OmpA family membrane protein	NA	954	0	0	1	0	1	0	0	0		ATTACAAGCAGTTAAGTAAAGATTTAAACTCAACTTTAGATAATAAAGATA
558503	'-'	1	1	4.03	2.18	3.62	2	Cj0601c	putative sodium-dependent transmembrane transport protein	NA	1344	0	0	1	0	1	0	0	1		CTTAAAAGTTCATGGTTTGGAATTTGGTTTTATTATGTAAAATATATAGTA
558503	'-'	1	1	4.03	2.18	3.62	2	Cj0600	hypothetical protein	NA	876	0	0	0	1	1	0	0	1		CTTAAAAGTTCATGGTTTGGAATTTGGTTTTATTATGTAAAATATATAGTA
559350	'+'	1	1	4.44	>100	6.63	1	Cj0601c	putative sodium-dependent transmembrane transport protein	NA	1344	0	0	0	1	1	0	0	1		ATTTTTCTATACCATCTATAATGCCTCTTTTTAAAATAATATAATTAATAA
559822	'-'	1	1	65.05	1.93	4.32	1	Cj0601c	putative sodium-dependent transmembrane transport protein	21	1344	1	0	0	0	1	0	0	0		AGCTATATGGATAGCTTATAAGTTTTTAAAGTTATTTTTAGGTAAAATAAT
560149	'+'	1	1	5.17	>100	7.46	1	Cj0602c	MOSC-domain containing protein	NA	669	0	0	0	1	1	0	0	1		TAATACCATCCACTCAAGCCCGTTTTAAAAATTTCATGTGTAAAATTTGGA
562406	'+'	1	1	92.4	32.25	5.14	1	Cj0604	putative polyphosphate kinase	NA	882	0	0	1	0	1	0	0	0		AAAGAATGAAATTTATGTTTCTGTTAAAAGAAAGAAAAGTACAATAGAATA
562692	'+'	1	1	72.81	40.4	7.11	1	Cj0604	putative polyphosphate kinase	NA	882	0	0	1	0	1	0	0	0		CCCTCAGCCGGTGAGATTGTGATTTTTGACAGATCTTGGTATAATCGTGCA
562920	'-'	1	1	8.13	>100	6.08	1	Cj0604	putative polyphosphate kinase	NA	882	0	0	0	1	1	0	0	1		GTTGGAGTATTAGATGCTAAAAGCATAGAGTATTTAGCTAAAGTATATTTA
563060	'+'	1	1	10.35	2.33	2.49	2	Cj0605	putative amidohydrolase	145	1191	1	0	0	0	1	0	0	0		AGCAAGATTAAATTTATTGCGTTTTATACTTTCTAAGGTAGAATATCCAAA
563060	'+'	1	1	10.35	2.33	2.49	2	Cj0604	putative polyphosphate kinase	NA	882	0	0	1	0	1	0	0	0		AGCAAGATTAAATTTATTGCGTTTTATACTTTCTAAGGTAGAATATCCAAA
563522	'+'	1	1	53.22	49	5.48	1	Cj0605	putative amidohydrolase	NA	1191	0	0	1	0	1	0	0	0		GAAAAAACTAATCTAAGCTATGCTTCAAAAATTGATGGTAAGATGCATGCA
564448	'+'	1	1	190.34	5.66	8.43	1	Cj0606	putative secretion protein HlyD	26	1173	1	0	0	0	1	0	0	0		TAGAATTAAAAATTCACAAAAAATTCACAAAAAATGAGTAAAATTTAATCT
567099	'+'	1	1	9.24	>100	2.11	1	Cj0607	ABC transporter transmembrane protein	NA	1926	0	0	1	0	1	0	0	0		GGTTAAAGATGATGTGAGTTCAACTTTGGCTGAAAATGCTATTATAAGAAT
568297	'-'	1	1	7.43	>100	7.19	1	Cj0608	putative outer membrane efflux protein	NA	1371	0	0	0	1	1	0	0	1		CAGGACTTAAGGTTTTAAAATCATTTAAAGATAAAGTTTTAAAATACTCTA
568556	'+'	1	1	24.39	67	2.79	1	Cj0608	putative outer membrane efflux protein	NA	1371	0	0	1	0	1	0	0	0		GATGATAGTTTTAAATTTGAAATTTTAAGTGGTAATGTTAAGATTTCTTTA
568769	'-'	1	1	1.86	1.71	13.26	1	Cj0608	putative outer membrane efflux protein	NA	1371	0	0	0	1	1	0	0	1		GTATTGTTTGCATCCAAATAATCTTTTAATTCGCTTTTTCCTAAAATATAT
572472	'+'	1	1	4.07	>100	3.69	1	Cj0611c	putative acyltransferase family protein	NA	1377	0	0	0	1	1	0	0	1		TAATCATTTTTAAAAGTCCAATAAATAGCAAAAAAAGCTATCATTAAAATA
572472	'+'	1	1	4.07	>100	3.69	1	Cj0612c	ferritin	NA	504	0	0	0	1	1	0	0	1		TAATCATTTTTAAAAGTCCAATAAATAGCAAAAAAAGCTATCATTAAAATA
572712	'+'	1	1	6.28	>100	6.08	1	Cj0612c	ferritin	NA	504	0	0	0	1	1	0	0	1		TGTTGTTCGCTTACATACCATTGTAAGAAATTAAAAGTAGAATAGTCTTTA
573073	'-'	1	1	804.61	3.69	3.1	1	Cj0612c	ferritin	29	504	1	0	0	0	1	0	0	0		ACTATCAAAAAATTTAGCTTGTTTTTAAAAAAATAATATATCATTATAAAA
573123	'-'	1	1	3.1	>100	8.29	1	Cj0612c	ferritin	79	504	0	1	0	0	1	0	0	0		ACATTTTGGAAACATTTTTTATTTTGTATTTTTCTTAAATATAATTTTTAA
573199	'+'	1	1	7.76	>100	5.96	1	Cj0613	putative periplasmic phosphate binding protein	25	996	1	0	0	0	1	0	0	0		AAAATAAAAAATGTTTCCAAAATGTTTCCAAGTTTTTTTAAACTTCCATTA
576173	'-'	1	1	3.72	>100	8.29	1	Cj0615	putative phosphate transport system permease	NA	1089	0	0	0	1	1	0	0	1		TTAATTTTCCTTGAAAATATTTTCTTAATAATATTGCACTAAGATTTAATA
576173	'-'	1	1	3.72	>100	8.29	1	Cj0616	phosphate ABC transporter ATP-binding protein	NA	741	0	0	0	1	1	0	0	1		TTAATTTTCCTTGAAAATATTTTCTTAATAATATTGCACTAAGATTTAATA
576444	'+'	1	1	296.78	4.3	5.09	1	Cj0616	phosphate ABC transporter ATP-binding protein	NA	741	0	0	1	0	1	0	0	0		AAATCGATGGTTTAGTGGAAATTAAAGGAAAAGATGTTAAAAATCAAGATG
576555	'+'	1	1	9.6	6	3.08	1	Cj0616	phosphate ABC transporter ATP-binding protein	NA	741	0	0	1	0	1	0	0	0		GCATTTATGAAAACATCTCTTATGCACCAAAACTTCATGGTATGATTAAAA
576844	'-'	1	1	4.44	>100	5.48	1	Cj0616	phosphate ABC transporter ATP-binding protein	NA	741	0	0	0	1	1	0	0	1		CTCCAAATTCTATAAGCTCACCTAGGTGAAAAAATGCTGTATAATCAGCTA
577002	'+'	1	0	2.59	3.33	0.91	1	Cj0617	hypothetical protein	25	612	1	0	0	0	1	0	0	0		GTGCTTTTGGGTGAGATTTATTTTTTGGAAATTTGATGATATAATTAATTA
577528	'+'	1	1	455.71	26.16	9.51	2	Cj0618	hypothetical protein	80	648	1	0	0	0	1	0	0	0		GTTTTTTACCATTTAAAAATGAATATCAAAATTTTGGTATAATGCAAGCTA
577528	'+'	1	1	455.71	26.16	9.51	2	Cj0617	hypothetical protein	NA	612	0	0	1	0	1	0	0	0		GTTTTTTACCATTTAAAAATGAATATCAAAATTTTGGTATAATGCAAGCTA
577945	'-'	1	1	4.44	13	4.92	1	Cj0618	hypothetical protein	NA	648	0	0	0	1	1	0	0	1		TTTCCTTATTTTTAAAAGGAGATCTTTCATCAAAAATACTATGATATAAAA
578306	'+'	1	1	15.89	1.65	7.27	1	Cj0619	putative MATE family transport protein	39	1317	1	0	0	0	1	0	0	0		GTATATTAAATATTTATATTTAAAAAAGTAATTTTTAAGTAGAATTGTTTT
580302	'+'	1	1	207.34	24.47	8.65	1	Cj0621	hypothetical protein	24	1521	1	0	0	0	1	0	0	0		TTTAGGCAAAGAGAGAAAGAATTTTTAAGTTAAAAATGTTATATTTATAGT
581770	'-'	1	1	4.64	>100	12.43	1	Cj0621	hypothetical protein	NA	1521	0	0	0	1	1	0	0	1		ACTGACAATTTTTAAGATGTTTTAAAGTATTTTTAAGTAAAGATTTATGTT
581770	'-'	1	1	4.64	>100	12.43	1	Cj0622	carbamoyltransferase	NA	2190	0	0	0	1	1	0	0	1		ACTGACAATTTTTAAGATGTTTTAAAGTATTTTTAAGTAAAGATTTATGTT
583373	'+'	1	1	11.46	>100	6.81	1	Cj0622	carbamoyltransferase	NA	2190	0	0	1	0	1	0	0	0		AGCTTTTATTTGTGATGGAACAGGTTATGGCGAAGATGGTAAAATTTGGGG
583452	'-'	1	1	32.52	63	8.7	1	Cj0622	carbamoyltransferase	NA	2190	0	0	0	1	1	0	0	1		AAATCATAATGAAAAATAAGACTTAAGGCTAAATTTTGTATATTTTTAATA
583820	'-'	1	1	5.91	>100	6.05	1	Cj0622	carbamoyltransferase	NA	2190	0	0	0	1	1	0	0	1		AAAGCACTTTTAAATCATAATCTTTGCTAAAATCTATGATAAAATTTGCCA
584072	'+'	1	0	4.07	12	1.94	1	Cj0623	hydrogenase isoenzymes formation protein	22	744	1	0	0	0	1	0	0	0		ATATTCTAAAAACTCATAATTTTTTAATGCTTTTAAGGTTAAAATGAAACA
587194	'+'	1	0	2.96	2.6	1.66	1	Cj0627	hydrogenase expression%2Fformation protein	NA	345	0	0	1	0	1	0	0	0		CTTTTACCAAGAATTTGCTAATGCACGAATTAAGTATAGTAGAATCTTTAA
587779	'+'	1	1	49.16	>100	6.22	1	Cj0628	putative lipoprotein	89	3436	0	1	0	0	1	0	0	0		AAACTAAAAATTTAAACCAAAATTTTAATAATAATTTAAGTATAATTATTA
587790	'+'	1	1	327.09	7.89	5.7	1	Cj0628	putative lipoprotein	78	3436	1	0	0	0	1	0	0	0		TTAAACCAAAATTTTAATAATAATTTAAGTATAATTATTATATAGTCTTCA
588673	'-'	1	1	10.53	>100	28.18	1	Cj0628	putative lipoprotein	NA	3436	0	0	0	1	1	0	0	1		TCCTTTTATGGTTCCCTTATTTATTAATGTTTTTACATTAGCATTTATCTG
589379	'-'	1	1	4.18	28	46.42	1	Cj0628	putative lipoprotein	NA	3436	0	0	0	1	1	0	0	1		TCCCACTAACAGTAATACCACCTGTTATACTTCCTGAGCCAGAGTTAGCTA
589626	'-'	1	1	17.5	16	16.58	1	Cj0628	putative lipoprotein	NA	3436	0	0	0	1	1	0	0	1		GAAGTGTTAGTGATAGAATCAAGTTTACTATCTTTATATACAGTAATTGAA
591144	'+'	1	1	16.1	4.93	2.07	2	CjNC5	CjNC5	169	114	1	0	0	0	1	0	0	0		AATATCAATCCTAAAGTAGAAGCTGAGGCTAGATTTGGTAATATAAAAGTA
591144	'+'	1	1	16.1	4.93	2.07	2	Cj0628	putative lipoprotein	NA	3436	0	0	1	0	1	0	0	0		AATATCAATCCTAAAGTAGAAGCTGAGGCTAGATTTGGTAATATAAAAGTA
591393	'-'	1	1	20.51	4.7	4.85	2	CjNC21	CjNC21	NA	101	0	0	1	0	1	0	0	1		ACTTTAAAAGAATGATTGCAATCTAAAAAGAGTTTAATAACCTTAAAAACA
591393	'-'	1	1	20.51	4.7	4.85	2	Cj0628	putative lipoprotein	NA	3436	0	0	0	1	1	0	0	1		ACTTTAAAAGAATGATTGCAATCTAAAAAGAGTTTAATAACCTTAAAAACA
591393	'-'	1	1	20.51	4.7	4.85	2	CjNC5	CjNC5	NA	114	0	0	0	1	1	0	0	1		ACTTTAAAAGAATGATTGCAATCTAAAAAGAGTTTAATAACCTTAAAAACA
591456	'-'	1	1	5.26	6.67	4.14	2	CjNC21	CjNC21	0	101	0	1	0	0	1	0	0	1		TTAATCGTATTAAAATAATTTAAAATGATTGTATTGTTATAATCTTTGTTG
591456	'-'	1	1	5.26	6.67	4.14	2	CjNC5	CjNC5	NA	114	0	0	0	1	1	0	0	1		TTAATCGTATTAAAATAATTTAAAATGATTGTATTGTTATAATCTTTGTTG
592524	'-'	1	1	18.58	5.29	2.99	2	Cj0630c	DNA polymerase III subunit delta	22	966	1	0	0	0	1	0	0	0		AAATCATGGAAGCGGATATAGTTATGGCAAAAATTTATGCTAAAATCACCC
592524	'-'	1	1	18.58	5.29	2.99	2	Cj0631c	putative ribonuclease	NA	1935	0	0	1	0	1	0	0	0		AAATCATGGAAGCGGATATAGTTATGGCAAAAATTTATGCTAAAATCACCC
594462	'-'	1	1	22.18	25	4.14	2	Cj0631c	putative ribonuclease	33	1935	1	0	0	0	1	0	0	1		ATTATAGCAATTAAAGTATAAATTTCATATTTTTTTTATAAACTTTATGTA
594462	'-'	1	1	22.18	25	4.14	2	Cj0632	ketol-acid reductoisomerase	NA	1023	0	0	0	1	1	0	0	1		ATTATAGCAATTAAAGTATAAATTTCATATTTTTTTTATAAACTTTATGTA
594519	'+'	1	1	1552.66	10.98	6.68	2	Cj0632	ketol-acid reductoisomerase	29	1023	1	0	0	0	1	0	0	1		AGTTTATAAAAAAAATATGAAATTTATACTTTAATTGCTATAATAATACCT
594519	'+'	1	1	1552.66	10.98	6.68	2	Cj0631c	putative ribonuclease	NA	1935	0	0	0	1	1	0	0	1		AGTTTATAAAAAAAATATGAAATTTATACTTTAATTGCTATAATAATACCT
597574	'+'	1	1	6.5	7	2.07	2	Cj0636	NOL1%2FNOP2%2Fsun family protein	254	840	1	0	0	0	1	0	0	0		CAAGCCGCTAATGAAATCAAAAATTTACTTAAAATACATGAAATTTCTTTA
597574	'+'	1	1	6.5	7	2.07	2	Cj0635	Holliday junction resolvase-like protein	NA	384	0	0	1	0	1	0	0	0		CAAGCCGCTAATGAAATCAAAAATTTACTTAAAATACATGAAATTTCTTTA
598686	'-'	1	1	6.28	>100	4.08	1	Cj0636	NOL1%2FNOP2%2Fsun family protein	NA	840	0	0	0	1	1	0	0	1		AGAAAAAATTATTTATTGTTTTTTAAGTTTTTTTATGAATTTGTATTTAAA
599888	'+'	1	1	3.1	>100	16.58	1	Cj0638c	inorganic pyrophosphatase	NA	519	0	0	0	1	1	0	0	1		ATTTCGATTACGGCATTGATTTTATTTGGAATATCTCCGATTTTGATTTTG
599888	'+'	1	1	3.1	>100	16.58	1	Cj0639c	adenylate kinase	NA	579	0	0	0	1	1	0	0	1		ATTTCGATTACGGCATTGATTTTATTTGGAATATCTCCGATTTTGATTTTG
602268	'-'	1	1	845.26	2.56	4.96	2	Cj0640c	aspartyl-tRNA synthetase	33	1752	1	0	0	0	1	0	0	1		TATATCAAATCTTAGCAAAGCAAAAGAATAAAAATACTATAATTTTGCTCA
602268	'-'	1	1	845.26	2.56	4.96	2	Cj0641	inorganic polyphosphate%2FATP-NAD kinase	NA	861	0	0	0	1	1	0	0	1		TATATCAAATCTTAGCAAAGCAAAAGAATAAAAATACTATAATTTTGCTCA
602326	'+'	1	1	106.44	>100	6.71	2	Cj0641	inorganic polyphosphate%2FATP-NAD kinase	0	861	1	0	0	0	1	0	0	1		ATTATAGTATTTTTATTCTTTTGCTTTGCTAAGATTTGATATAATTTTTTA
602326	'+'	1	1	106.44	>100	6.71	2	Cj0640c	aspartyl-tRNA synthetase	NA	1752	0	0	0	1	1	0	0	1		ATTATAGTATTTTTATTCTTTTGCTTTGCTAAGATTTGATATAATTTTTTA
602533	'+'	1	1	83.9	6.54	4.01	1	Cj0641	inorganic polyphosphate%2FATP-NAD kinase	NA	861	0	0	1	0	1	0	0	0		TGCCAAAGTATGGATTGGATGATTTGTTTAAAATATCCGATTTTGTTATTT
603168	'-'	1	1	4.34	>100	3.32	1	Cj0641	inorganic polyphosphate%2FATP-NAD kinase	NA	861	0	0	0	1	1	0	0	1		AAGATTTTCTTTCATAAAAATTCTATTTATCATCAATTTCCCCAGTGTAAT
603168	'-'	1	1	4.34	>100	3.32	1	Cj0642	putative DNA repair protein	NA	1524	0	0	0	1	1	0	0	1		AAGATTTTCTTTCATAAAAATTCTATTTATCATCAATTTCCCCAGTGTAAT
604744	'+'	1	1	504.86	>100	6.55	1	Cj0643	two-component response regulator	71	1245	1	0	0	0	1	0	0	0		CTTATTTAAGAATTAAGCGGATTTTTTATTTTGCTATGTTAAAATATATAA
607689	'-'	1	1	4.64	13	9.39	1	Cj0645	putative secreted transglycosylase	NA	1119	0	0	0	1	1	0	0	1		TTATCAAAAAATGCTACTTTATTAAGTGGTATATACATATAATACCCTTTA
608476	'-'	1	1	4.44	13	>100	1	Cj0646	putative lipoprotein	NA	828	0	0	0	1	1	0	0	1		GCAATCTCTCCACTATTTCCATAGTTTACATTAGAATGTACAATATTATTA
608935	'+'	1	1	1.85	6	2.27	1	Cj0647	putative HAD-superfamily hydrolase	NA	489	0	0	1	0	1	0	0	0		CTATCGAGGCTTGGCTAAAGCTTGGTAAAAAAATTGCTATTATTACAGGTA
609425	'+'	1	1	12.2	34	7.71	1	Cj0648	hypothetical protein	NA	516	0	0	1	0	1	0	0	0		GAGGCTAAAAATTTGAAAGCTTATGAGAGTAATACTAGTATAATTAAGGCA
610132	'+'	1	0	7.02	2.12	0.84	2	Cj0650	ribosome biogenesis GTP-binding protein YsxC	78	597	1	0	0	0	1	0	0	0		ATAAATGAGCTTGGAAGCAATCAAAAACTTTTTGGTGATAAAATAATAGTC
610132	'+'	1	0	7.02	2.12	0.84	2	Cj0649	putative OstA family protein	NA	462	0	0	1	0	1	0	0	0		ATAAATGAGCTTGGAAGCAATCAAAAACTTTTTGGTGATAAAATAATAGTC
612075	'+'	1	1	13.67	3.5	2.84	1	Cj0652	penicillin-binding protein	NA	1806	0	0	1	0	1	0	0	0		ATTTAACTTCATTGTTTGAAGGGAATGCTGGAGCTGCTATAATTATGAATG
612400	'+'	1	0	2.59	4.5	1.49	1	Cj0652	penicillin-binding protein	NA	1806	0	0	1	0	1	0	0	0		TCGATCAGGCCATGGACCTGTGGATTTAAAACATGCGATAAAATATAGTTG
615069	'-'	1	1	131.94	>100	12.76	2	Cj0653c	putative aminopeptidase	55	1791	1	0	0	0	1	0	0	0		TTTATTTTACCAATGTATGTGGATATTACTTGGTGCTGTTATAATTTTACT
615069	'-'	1	1	131.94	>100	12.76	2	Cj0654c	pseudo	NA	1472	0	0	1	0	1	0	0	0		TTTATTTTACCAATGTATGTGGATATTACTTGGTGCTGTTATAATTTTACT
616559	'-'	1	1	78.72	23.33	4.55	1	Cj0654c	pseudo	74	1472	1	0	0	0	1	0	0	0		TAAAGCTTGATTTAATGTTTAAATTTGTTAATTTATAATAATATTAAAATA
617308	'+'	1	1	1.85	>100	>100	1	Cj0660c	putative transmembrane protein	NA	1107	0	0	0	1	1	0	0	1		AGATTTGTGATTTTAAGGTCATTGGAGTTAAGCCATGATATGATTTGATTT
617370	'+'	1	1	7.39	4.33	7.74	1	Cj0660c	putative transmembrane protein	NA	1107	0	0	0	1	1	0	0	1		CTTATTTTTGTCTAAATTGATTTCTTTTGTTATGGTGGATAAAATATGAAA
621952	'+'	1	1	1.85	>100	>100	1	Cj0665c	argininosuccinate synthase	NA	1221	0	0	0	1	1	0	0	1		ATTTATCGCTACTAAATCTCCTTTTTGGAAATCAAGTTCTATAATTTCACT
622645	'-'	1	1	723.66	>100	4.82	1	Cj0665c	argininosuccinate synthase	33	1221	1	0	0	0	1	0	0	0		AAAATAGCAAGTAAAAACTTTTCTTTAATGAAATTTGGATACAATTTTATA
622768	'+'	1	1	580.08	>100	5.78	1	Cj0667	putative S4 domain protein	0	246	1	0	0	0	1	0	0	0		GTAAGCAAATTTTGTTCCAAAAATTGATTTTTTTTGCTAAAATTGCTTTTA
623016	'-'	1	1	35.11	3.31	10.69	1	Cj0667	putative S4 domain protein	NA	246	0	0	0	1	1	0	0	1		AGGCATTATTTGAAGCATCGTTTTGATCTCATTTTTTGCTAAAATAAATTC
623016	'-'	1	1	35.11	3.31	10.69	1	Cj0668	putative ATP%2FGTP-binding protein	NA	408	0	0	0	1	1	0	0	1		AGGCATTATTTGAAGCATCGTTTTGATCTCATTTTTTGCTAAAATAAATTC
623984	'+'	1	1	14.24	5	2.94	2	Cj0670	RNA polymerase factor sigma-54	154	1251	1	0	0	0	1	0	0	0		TCAAACTTTAATTAAAGAGCTTAAAAGATTGGGGATTGGGGTTTTAATTAC
623984	'+'	1	1	14.24	5	2.94	2	Cj0669	ABC-transporter ATP-binding protein	NA	729	0	0	1	0	1	0	0	0		TCAAACTTTAATTAAAGAGCTTAAAAGATTGGGGATTGGGGTTTTAATTAC
624998	'+'	1	0	9.24	2.47	1.54	1	Cj0670	RNA polymerase factor sigma-54	NA	1251	0	0	1	0	1	0	0	0		TTAGCGATGAGAAAAGCTACTCTTTATAAAATAGGGCTTATGATAGTAGAA
625520	'+'	1	1	2380.18	4.55	13.38	1	Cj0671	anaerobic C4-dicarboxylate transporter	32	1425	1	0	0	0	1	0	0	0		ATTTTTAGAAATATTATTCTTTAATTTAAAAATGTGATACAATAATAACTG
626508	'-'	1	1	7.02	>100	24.96	1	Cj0671	anaerobic C4-dicarboxylate transporter	NA	1425	0	0	0	1	1	0	0	1		AGTGCTATCATACCTGATTTAAAAATTTCATTAGAGCCGATTTTCTTTGCA
626800	'-'	1	1	34.74	3.66	6.26	1	Cj0671	anaerobic C4-dicarboxylate transporter	NA	1425	0	0	0	1	1	0	0	1		ATCAAATTGTATAGTAGCCAAATCGCTTGGATAAGTTGGTAAAATATAATA
626848	'+'	1	0	4.8	2.86	0.88	2	Cj0672	putative periplasmic protein	270	189	0	1	0	0	1	0	0	0		GGTATTATATTTTACCAACTTATCCAAGCGATTTGGCTACTATACAATTTG
626848	'+'	1	0	4.8	2.86	0.88	2	Cj0671	anaerobic C4-dicarboxylate transporter	NA	1425	0	0	1	0	1	0	0	0		GGTATTATATTTTACCAACTTATCCAAGCGATTTGGCTACTATACAATTTG
626859	'-'	1	1	11.15	37	12.27	1	Cj0671	anaerobic C4-dicarboxylate transporter	NA	1425	0	0	0	1	1	0	0	1		CCTGGTAAAATAAAACTATGATTGATAACAAATTTACCGATGTGAGTAGTA
627105	'+'	1	1	592.83	80.47	8.1	1	Cj0672	putative periplasmic protein	13	189	1	0	0	0	1	0	0	0		ATAAAATTAGTATTAATCAAAATATAAGCTTAACAAGGATAGAATAAATCC
627279	'-'	1	1	11.09	>100	4.16	1	Cj0672	putative periplasmic protein	NA	189	0	0	0	1	1	0	0	1		AAAATTTCTAGCATATTTTTCCTTTAAAATTTTTCAGGATATAATAGAGCA
627279	'-'	1	1	11.09	>100	4.16	1	Cj0676	pseudo	NA	1657	0	0	0	1	1	0	0	1		AAAATTTCTAGCATATTTTTCCTTTAAAATTTTTCAGGATATAATAGAGCA
628092	'+'	1	1	9.61	14	11.05	1	Cj0676	pseudo	NA	1657	0	0	1	0	1	0	0	0		CTTTACTTACAAATTTTTTGCAAATTTTATCCATGATGCTTATTCCTAGTG
629627	'+'	1	1	248.97	45.67	13.9	1	Cj0677	potassium-transporting ATPase subunit B	NA	2046	0	0	1	0	1	0	0	0		GATTAAAATTTTAGTTGGAGCTGGGGAAAGTTTTTTAGATAAAATGATCAA
630588	'+'	1	1	5.26	6	9.12	1	Cj0677	potassium-transporting ATPase subunit B	NA	2046	0	0	1	0	1	0	0	0		AAGATAGTAGCCATGACAGGAGATGGAACCAATGATGCTCCAGTTCTTACA
631002	'+'	1	1	46.57	>100	8.62	2	Cj0678	pseudo	65	595	1	0	0	0	1	0	0	0		TTGCTTTTAAGAAATTTGAGTATTTATGGTTTAGGTGGTATGATAGCACCT
631002	'+'	1	1	46.57	>100	8.62	2	Cj0677	potassium-transporting ATPase subunit B	NA	2046	0	0	1	0	1	0	0	0		TTGCTTTTAAGAAATTTGAGTATTTATGGTTTAGGTGGTATGATAGCACCT
632913	'-'	1	1	2.22	>100	>100	1	Cj0679	truncated KdpD protein	NA	1821	0	0	0	1	1	0	0	1		AAATTTTATTATCAGAAATAAAAGAAGAAGCAAAAACTGCTAAAATAAAAA
635315	'+'	1	1	5.17	3.67	9.12	1	Cj0680c	excinuclease ABC subunit B	NA	1974	0	0	0	1	1	0	0	1		GGATATAGGCTTCAGGTTGATAATAATCATAATAAGATATAAAATATTCCA
635671	'+'	1	1	707.77	13.21	2.92	1	Cj0681	hypothetical protein	45	231	1	0	0	0	1	0	0	0		TTAATTGACAATAAAAACCTAAATTTAAATTTTTTTCTGCTACAATATCAA
637097	'+'	1	1	161.64	8.2	15.41	1	Cj0684	primosome assembly protein PriA	NA	1854	0	0	1	0	1	0	0	0		AAAGAGTGTTTAGAACAGGGTAAGCAAGCTTTGCTTTTGATGCCAGAAATC
637637	'+'	1	1	12.94	4.89	2.5	1	Cj0684	primosome assembly protein PriA	NA	1854	0	0	1	0	1	0	0	0		AATTTTAGGCAAATCATTTGCAAGGATTGTGGAGAAACGATAAAATGTCCT
637686	'-'	1	1	9.24	2.79	7.37	1	Cj0684	primosome assembly protein PriA	NA	1854	0	0	0	1	1	0	0	1		GCAACTTGGACAATTTTGCTCTATTAAAGAAGTATAATTACAATAATGACA
637693	'+'	1	1	8.13	6.5	9.12	1	Cj0684	primosome assembly protein PriA	NA	1854	0	0	1	0	1	0	0	0		TTCTATTGCTATGAGTATGCATAAAAAGAAAAATATTTTAAAATGTCATTA
638501	'+'	1	1	27.72	>100	4.81	1	Cj0685c	invasion protein CipA	NA	1353	0	0	0	1	1	0	0	1		ATATGATTATTTATCTTTGTATATTTTTTCAAATTCTTTATAATATTTCCA
638548	'-'	1	1	4.07	>100	4.16	1	Cj0685c	invasion protein CipA	NA	1353	0	0	1	0	1	0	0	0		ATTTTATAAAAAATAAATCACTTATTTACACTTTTTTAATATATTTGAAAA
639384	'+'	1	1	17.96	10.67	7.58	1	Cj0685c	invasion protein CipA	NA	1353	0	0	0	1	1	0	0	1		TAAAATCTAATAAAGATAGATATTTATCAAAATAAGGTAGATTAATTTCTG
639915	'-'	1	0	2.79	8	1.99	2	Cj0685c	invasion protein CipA	23	1353	1	0	0	0	1	0	0	1		TTTTAACTTTTTATTGCTTTAATTAAAGTTTATTTTTGATAATATATTTAA
639915	'-'	1	0	2.79	8	1.99	2	Cj0686	4-hydroxy-3-methylbut-2-en-1-yl diphosphate synthase	NA	1074	0	0	0	1	1	0	0	1		TTTTAACTTTTTATTGCTTTAATTAAAGTTTATTTTTGATAATATATTTAA
639972	'+'	1	1	1866.45	61.84	7.07	2	Cj0686	4-hydroxy-3-methylbut-2-en-1-yl diphosphate synthase	26	1074	1	0	0	0	1	0	0	1		TATTATCAAAAATAAACTTTAATTAAAGCAATAAAAAGTTAAAATTTGATA
639972	'+'	1	1	1866.45	61.84	7.07	2	Cj0685c	invasion protein CipA	NA	1353	0	0	0	1	1	0	0	1		TATTATCAAAAATAAACTTTAATTAAAGCAATAAAAAGTTAAAATTTGATA
640874	'+'	1	1	48.93	11.53	6.1	1	Cj0686	4-hydroxy-3-methylbut-2-en-1-yl diphosphate synthase	NA	1074	0	0	1	0	1	0	0	0		GTGCGATTAAAATCGTAGAGGAAAAAACCAAGCATATAAAAGAACCTTTAA
641452	'+'	1	1	8.36	14.5	6.87	1	Cj0687c	flagellar basal body L-ring protein	NA	699	0	0	0	1	1	0	0	1		TGTGTAGTTGTTTGAACTATTGGTTTGAAAGCCTATATTAGAATAAGCATT
641848	'+'	1	0	162.11	3.17	1.52	2	Cj0688	putative phosphate acetyltransferase	42	1506	1	0	0	0	1	0	0	1		CATTTTCGTCCTTTAAAATATGAATTTTTATTTTTCTTTGTTAAAATTAGA
641848	'+'	1	0	162.11	3.17	1.52	2	Cj0687c	flagellar basal body L-ring protein	NA	699	0	0	0	1	1	0	0	1		CATTTTCGTCCTTTAAAATATGAATTTTTATTTTTCTTTGTTAAAATTAGA
641959	'-'	1	1	8.13	1.92	9.21	2	Cj0687c	flagellar basal body L-ring protein	159	699	1	0	0	0	1	0	0	1		CACAGGGCAATAAATTGCGATATTTTTGTAAATTTTGCTATAATTTTTAAG
641959	'-'	1	1	8.13	1.92	9.21	2	Cj0688	putative phosphate acetyltransferase	NA	1506	0	0	0	1	1	0	0	1		CACAGGGCAATAAATTGCGATATTTTTGTAAATTTTGCTATAATTTTTAAG
644852	'+'	1	1	11.83	25	6.87	1	Cj0690c	putative restriction%2Fmodification enzyme	NA	3753	0	0	0	1	1	0	0	1		TTTATATTAAATTCTTGTTTTAGCTCATCAAAATGACGATTTTGATCATTG
647891	'+'	1	1	7.39	>100	11.35	1	Cj0690c	putative restriction%2Fmodification enzyme	NA	3753	0	0	0	1	1	0	0	1		ACTTTGTTTGAATTCAGTATAGAATTATCATAAAAACGCCAAAATCTACCA
647982	'-'	1	0	6.28	9.5	0.9	1	Cj0690c	putative restriction%2Fmodification enzyme	NA	3753	0	0	1	0	1	0	0	0		ATCAAGCAATGATTTCACAATCATTTTAGAGTCAAAAGCTTATAATATAGA
648266	'+'	1	1	27.87	>100	3.44	2	Cj0691	hypothetical protein	263	492	1	0	0	0	1	0	0	1		ATAAATTTATTTTTGTCGTAAATTTTTGTAATTTTAGTTAAAATATCTCTA
648266	'+'	1	1	27.87	>100	3.44	2	Cj0690c	putative restriction%2Fmodification enzyme	NA	3753	0	0	0	1	1	0	0	1		ATAAATTTATTTTTGTCGTAAATTTTTGTAATTTTAGTTAAAATATCTCTA
648415	'-'	1	1	123.81	>100	10	1	Cj0690c	putative restriction%2Fmodification enzyme	36	3753	1	0	0	0	1	0	0	0		ATTTTCATAAATAAGCACAAGTCTTTAAAGTTTTTTAGATATAATTTAAAA
648510	'+'	1	1	14.78	3.87	3.32	1	Cj0691	hypothetical protein	19	492	0	1	0	0	1	0	0	0		GAAAATGATTTTTTAGTTGGAATTAATTTTCTTTGGATAAAATTTTAATTA
649496	'+'	1	1	8.87	3	23.82	1	Cj0692c	hypothetical protein	NA	939	0	0	0	1	1	0	0	1		TTTTTGTATTTTAGTTTCTGTTTTTTGAATTTTTTCTATAGAATTTGTAAG
651019	'+'	1	1	1455.09	>100	13.17	1	Cj0694	putative periplasmic protein	24	1491	1	0	0	0	1	0	0	0		AAAATTTTATAATTAAACTCCACTTAAACACTTCTACGATACAATATCTGG
652353	'-'	1	1	4.8	>100	4.92	1	Cj0694	putative periplasmic protein	NA	1491	0	0	0	1	1	0	0	1		TCGGAGTTCATATCTAATTTTTGTTTATTTATTTTATATAATATTGCTTTA
652869	'+'	1	1	34.06	3.2	2.68	1	Cj0695	cell division protein FtsA	NA	1389	0	0	1	0	1	0	0	0		AAATAGGCATTAAAGAAATTCATCGTGCTGTAAGTACAGCTAAGCATACTG
653831	'+'	1	1	1101.76	47.58	4.6	2	Cj0696	cell division protein FtsZ	103	1113	1	0	0	0	1	0	0	0		AAATCTGATTTTTTTGATGAAAATTTGCAAGAAAATGATACAATTGCAATA
653831	'+'	1	1	1101.76	47.58	4.6	2	Cj0695	cell division protein FtsA	NA	1389	0	0	1	0	1	0	0	0		AAATCTGATTTTTTTGATGAAAATTTGCAAGAAAATGATACAATTGCAATA
656033	'+'	1	1	2.59	>100	6.63	1	Cj0698	flagellar basal body rod protein FlgG	10	792	1	0	0	0	1	0	0	0		AAGCTATCAATAAGCTTGCAGCTGTTAAATAATTTAAAATAAAATAAAAAA
658488	'+'	1	1	3.7	3.5	3.27	1	Cj0700	hypothetical protein	46	696	0	1	0	0	1	0	0	0		AAGATTAAAAAATAAAAATTTATATTTTTGTTTTAGATAAAATTGATTATA
658498	'+'	1	1	332.63	6.88	2.77	1	Cj0700	hypothetical protein	36	696	1	0	0	0	1	0	0	0		AATAAAAATTTATATTTTTGTTTTAGATAAAATTGATTATAATTTTGAGCA
660319	'-'	1	1	4.44	>100	13.26	1	Cj0701	putative protease	NA	1254	0	0	0	1	1	0	0	1		GTTTTTTAAACTCTATAAAATATTTACCCTCTTTTTGATAAATTTTACCTA
661794	'-'	1	1	191.26	7.41	5.01	1	Cj0704	glycyl-tRNA synthetase subunit alpha	NA	864	0	0	0	1	1	0	0	1		TTTTTAAATCAAAACCCAAATTTTCAAGACTTTTAAGATATAATTCTTGAA
663079	'+'	1	1	172.23	>100	7.54	2	Cj0706	hypothetical protein	38	717	1	0	0	0	1	0	0	0		ATGTTTAGCAAAAGACTTGAAAAATTTGCCGCTACAAGTTATAATAACAGT
663079	'+'	1	1	172.23	>100	7.54	2	Cj0705	hypothetical protein	NA	726	0	0	1	0	1	0	0	0		ATGTTTAGCAAAAGACTTGAAAAATTTGCCGCTACAAGTTATAATAACAGT
664890	'+'	1	1	64.31	>100	5.52	2	Cj0708	putative ribosomal pseudouridine synthase	78	753	1	0	0	0	1	0	0	0		GGAAAATGTATATTTTTGTGAAAAATTAAAGGATTTAAATGATAAAGTTCA
664890	'+'	1	1	64.31	>100	5.52	2	Cj0707	3-deoxy-D-manno-octulosonic-acid transferase	NA	1158	0	0	1	0	1	0	0	0		GGAAAATGTATATTTTTGTGAAAAATTAAAGGATTTAAATGATAAAGTTCA
665755	'+'	1	1	300.85	9.95	5.9	1	Cj0709	signal recognition particle protein	33	1338	1	0	0	0	1	0	0	0		AAATTTAGATTTTTAAAGCCATTTAAGAAAAAATTTTGTATAATGCAAGGT
666498	'-'	1	1	5.91	17	9.64	1	Cj0709	signal recognition particle protein	NA	1338	0	0	0	1	1	0	0	1		AAGGCTACTCCACCTTTAGTATCTGCATCAAATTTTGATAAAATTACCCCA
667583	'+'	1	0	7.39	4.33	1.21	2	Cj0712	putative 16S rRNA processing protein	72	540	1	0	0	0	1	0	0	0		ACATAAGGTTGATACAGGTAAGCTTATAGGTAAAAATGGAAAAATGATCAA
667583	'+'	1	0	7.39	4.33	1.21	2	Cj0711	hypothetical protein	NA	243	0	0	1	0	1	0	0	0		ACATAAGGTTGATACAGGTAAGCTTATAGGTAAAAATGGAAAAATGATCAA
667826	'+'	1	1	8.5	>100	2.13	1	Cj0712	putative 16S rRNA processing protein	NA	540	0	0	1	0	1	0	0	0		TTATAAAAAACACCAAAGAAATGTTAAAGATTAAGCATTATAATGCAAACA
668350	'+'	1	1	161.14	5.74	7.98	1	Cj0713	tRNA %28guanine-N%281%29-%29-methyltransferase	NA	705	0	0	1	0	1	0	0	0		ATCCAAGAGATTTTTCTAAAAATTCTTATCATAAAGTCGATGATTATAAAA
668817	'+'	1	1	818.65	7.92	8.67	2	Cj0714	50S ribosomal protein L19	89	357	1	0	0	0	1	0	0	0		TTTTATACTCCTTCAGAGTTTTTAAAGGGTAATCACGCTAGAATTGCAAGT
668817	'+'	1	1	818.65	7.92	8.67	2	Cj0713	tRNA %28guanine-N%281%29-%29-methyltransferase	NA	705	0	0	1	0	1	0	0	0		TTTTATACTCCTTCAGAGTTTTTAAAGGGTAATCACGCTAGAATTGCAAGT
669371	'+'	1	1	2855.48	17.9	5.38	1	Cj0715	transthyretin-like periplasmic protein	24	414	1	0	0	0	1	0	0	0		ATTATTTATTTGATTTTAATTATTAATAATACTCTTGTATAATATTCCTTG
670711	'-'	1	1	6.5	>100	11.6	1	Cj0716	putative phospho-2-dehydro-3-deoxyheptonate aldolase	NA	1341	0	0	0	1	1	0	0	1		TTCATTGTTTGGATTTAAAACATTTGCTAAAGCTATGATATCATCAGCACT
671798	'-'	1	1	1584.08	6.42	6.78	1	CjNC13	CjNC13	0	281	1	0	0	0	1	0	0	0		AAATTTTACAAAAAGGCAAAAATTCAGCCAAAATAAACTATAATAAAATCT
671908	'+'	1	1	38.07	28.5	3.05	1	Cj0718	DNA polymerase III subunit alpha	38	3603	0	1	0	0	1	0	0	0		TTTAGGGTCAATTTCTTTCAAATTCAGCGAGAAAAATTTATAATTTTTATC
673764	'+'	1	0	7.76	4.5	0.74	1	Cj0718	DNA polymerase III subunit alpha	NA	3603	0	0	1	0	1	0	0	0		CAGTAATCAATAATGCGATCAAGCTTATTAAAAAGCGTTACAATAAAGACA
673782	'-'	1	1	7.02	7.5	5.22	1	Cj0718	DNA polymerase III subunit alpha	NA	3603	0	0	0	1	1	0	0	1		CAAAGTATTTCCACTTTGTATGGTTTTATAAACTTTGCTATCATTTACATC
675058	'+'	1	1	11.46	4.44	2.06	1	Cj0718	DNA polymerase III subunit alpha	NA	3603	0	0	1	0	1	0	0	0		TTTCAAATCCATGATGAGTAAAAATAATAAGCGTTATGGTAGAATTGAAAT
677004	'-'	1	1	1604.77	8.91	2.2	1	Cj0720c	flagellin	28	750	1	0	0	0	1	0	0	0		TTTTTTATATTTCTTAAGCTTTAAAATAGCAAAAAAATGATAAAATATTAA
677040	'+'	1	1	3.33	>100	3.4	1	Cj0720c	flagellin	NA	750	0	0	0	1	1	0	0	1		TCTTTTGGATTTATTTAATATTTTATCATTTTTTTGCTATTTTAAAGCTTA
677040	'+'	1	1	3.33	>100	3.4	1	Cj0721c	putative integral membrane protein	NA	471	0	0	0	1	1	0	0	1		TCTTTTGGATTTATTTAATATTTTATCATTTTTTTGCTATTTTAAAGCTTA
677502	'-'	1	1	343.35	7.41	5.64	2	Cj0721c	putative integral membrane protein	17	471	1	0	0	0	1	0	0	0		TTATAATCGTGCTTTTATAGCTAAATTTACAAATATGCGTTATGATAAAAA
677502	'-'	1	1	343.35	7.41	5.64	2	Cj0722c	putative DNA methylase	NA	816	0	0	1	0	1	0	0	0		TTATAATCGTGCTTTTATAGCTAAATTTACAAATATGCGTTATGATAAAAA
681372	'-'	1	1	1601.45	11.56	6.5	2	Cj0726c	magnesium and cobalt transport protein	20	984	1	0	0	0	1	0	0	1		ACATTTTAGAAACAAGTTAATTTTTAAGCAAACAAGGTTATAATTTTAAAG
681372	'-'	1	1	1601.45	11.56	6.5	2	Cj0727	putative periplasmic solute-binding protein	NA	1047	0	0	0	1	1	0	0	1		ACATTTTAGAAACAAGTTAATTTTTAAGCAAACAAGGTTATAATTTTAAAG
683539	'-'	1	1	6.5	6.25	>100	1	Cj0728	putative periplasmic protein	NA	1326	0	0	0	1	1	0	0	1		TCATCTAATTTAACCTTGTAAATTCTTTTAAATTGAGCTACATTATTAAAA
683806	'-'	1	1	2.22	>100	>100	1	Cj0728	putative periplasmic protein	NA	1326	0	0	0	1	1	0	0	1		GGACATCATTTACTCTTTAAAAAATCTTTTACTTCAAGTAAAATAAATTCA
683806	'-'	1	1	2.22	>100	>100	1	Cj0729	putative type I phosphodiesterase%2Fnucleotide pyrophosphatase	NA	810	0	0	0	1	1	0	0	1		GGACATCATTTACTCTTTAAAAAATCTTTTACTTCAAGTAAAATAAATTCA
685531	'+'	1	1	4.07	3.33	9.64	1	Cj0731	putative ABC transporter permease	NA	780	0	0	1	0	1	0	0	0		TAAGGTGCTTTAAATGAATGAAAATTTGAGTTTAAAAGCTAAAATTTATCA
685778	'+'	1	1	4.8	2.33	7.66	1	Cj0731	putative ABC transporter permease	NA	780	0	0	1	0	1	0	0	0		TTACTTTCTGTGATTCTTGTTTTCCCTTTGGTTTTTGTGCTAAATTATTAT
686468	'-'	1	1	4.07	>100	13.26	1	Cj0732	ABC transporter ATP-binding protein	NA	990	0	0	0	1	1	0	0	1		AAAACCATACCTATATTTCTTTTTTGAGGACTTAATTTGGTAAGATCTTTA
687045	'+'	1	1	3.7	>100	2.84	2	Cj0733	putative HAD-superfamily hydrolase	218	639	1	0	0	0	1	0	0	0		TAAGCCCTAAAGAGCTTGATAGCTTGGGTTTAAAACACGATTTTAAAAAAG
687045	'+'	1	1	3.7	>100	2.84	2	Cj0732	ABC transporter ATP-binding protein	NA	990	0	0	1	0	1	0	0	0		TAAGCCCTAAAGAGCTTGATAGCTTGGGTTTAAAACACGATTTTAAAAAAG
687580	'+'	1	1	18.48	51	14.47	1	Cj0733	putative HAD-superfamily hydrolase	NA	639	0	0	1	0	1	0	0	0		GCTAAAGAACTTATAATCAAATATCAAGATCAAAGGTGTATTATAATTTCA
688703	'-'	1	1	175.93	7.43	3.03	1	Cj0734c	histidine-binding protein precursor	23	756	1	0	0	0	1	0	0	0		ATTGATCCAGACTTAATTAAATATAAATTTAAAATAAGTATAATTTTAAAA
688882	'+'	1	1	70.96	50.5	2.2	1	Cj0735	putative periplasmic protein	125	720	1	0	0	0	1	0	0	0		TAAAATTTTATTTAAGAATATATTAATATAAAATTTGTTAAATTTTCATTA
689419	'-'	1	1	9.98	28	9.39	1	Cj0735	putative periplasmic protein	NA	720	0	0	0	1	1	0	0	1		TATTATTTGTTGCATTTGTATTTTGCGCATAAGCTGTTACAATAAAAGGCA
690552	'-'	1	1	8.5	>100	13.05	1	Cj0736	hypothetical protein	NA	1929	0	0	0	1	1	0	0	1		TTTTCAAAATTTACTTCATTATTGTTTGATTCATCGGCGATATAGTCTATA
691329	'-'	1	1	2.22	7	>100	1	Cj0736	hypothetical protein	NA	1929	0	0	0	1	1	0	0	1		ATGAGAATATATTTTCCTTTTGTTGGTTTATTTTTAGTAAGAATTTCCATA
692570	'+'	1	1	21.07	>100	10.61	2	Cj0738	hypothetical protein	156	165	1	0	0	0	1	0	0	0		AAATCTTTCGATGGTTCTGGTTATGCTTTAAAAAATGTTAATATTAATTCA
692570	'+'	1	1	21.07	>100	10.61	2	Cj0737	putative hemagglutination activity domain-containing protein	NA	1077	0	0	1	0	1	0	0	0		AAATCTTTCGATGGTTCTGGTTATGCTTTAAAAAATGTTAATATTAATTCA
693910	'-'	1	1	3.41	>100	9.12	1	Cj0741	hypothetical protein	NA	927	0	0	0	1	1	0	0	1		AATGAGGCTAATTTTCCTTTAAAATTAAAATTTCCAGTGTATACTTTACCA
694594	'-'	1	1	11.83	6.33	11.84	1	Cj0742	pseudo	NA	1693	0	0	0	1	1	0	0	1		TTGCCGAAGGATGGCCACTTAATTGACAATAATAAGCTATAATGTTTGTTA
695085	'-'	1	1	8.5	>100	26.09	1	Cj0742	pseudo	NA	1693	0	0	0	1	1	0	0	1		GCAAATGGAGTAATTTTTAAATTCCCTATAAAAGTACTATAATTAATCCCA
695845	'+'	1	1	7.12	6.75	>100	1	Cj0742	pseudo	NA	1693	0	0	1	0	1	0	0	0		TATAAATACTCTATACAAGAAGTGCTAATTTTTATGTAAAAATGGATGCTG
696052	'+'	1	1	1.86	>100	4.26	1	orphan	orphan	NA	NA	0	0	0	0	1	0	0	0		ACTATTTAATCCTTTATTTAATCCCCTTTTAAGTTTAATTGGTTATACTTT
696057	'+'	1	1	37.94	6.03	8.73	1	orphan	orphan	NA	NA	0	0	0	0	1	0	0	0		TTAATCCTTTATTTAATCCCCTTTTAAGTTTAATTGGTTATACTTTCATTT
697916	'+'	1	1	137.18	2.13	3.26	2	Cjp14	tRNA-Ala	125	76	0	1	0	0	1	0	0	0		AGTGGAATCAGCGACTGGGGTGAAGTCGTAACAAGGTAACCGTAGGAGAAC
697916	'+'	1	1	137.18	2.13	3.26	2	Cjr07	16S ribosomal RNA	NA	1513	0	0	1	0	1	0	0	0		AGTGGAATCAGCGACTGGGGTGAAGTCGTAACAAGGTAACCGTAGGAGAAC
698041	'+'	1	1	54.09	3.71	3.04	1	Cjp14	tRNA-Ala	0	76	0	1	0	0	1	0	0	0		ATTGATTCTTGTTTAGATTTCAAAGATTGATGATAAAGCTAATTGTTTATG
698375	'+'	1	1	5.17	4.75	4.38	1	orphan	orphan	NA	NA	0	0	0	0	1	0	0	0		AATAGATATAAGTAGCATATACATTATGCATTTATATTTATAATGATTATG
698389	'+'	1	1	37.58	2.88	7.36	1	orphan	orphan	NA	NA	0	0	0	0	1	0	0	0		GCATATACATTATGCATTTATATTTATAATGATTATGTTAATATATATACT
698666	'-'	1	1	3.7	>100	46.42	1	Cjr08	23S ribosomal RNA	NA	2912	0	0	0	1	1	0	0	1		TTCTAAAACGCATCACTTCCTTGTTAAAGTTTTTATGATAAGACTTCTTTA
702484	'+'	1	1	10.72	2.45	2.11	1	orphan	orphan	NA	NA	0	0	0	0	1	0	0	0		GTTGGGTTAGGGGTTAATGTTGGGTTAGGGTGGATAGACTATGATTGTCTA
703019	'+'	1	1	13.67	>100	38.13	1	Cj0748	hypothetical protein	8	93	1	0	0	0	1	0	0	0		GCTCTAGTTAGGTATTTGACATAATCAGTAATTTTTTATAGAATACCTATG
703156	'-'	1	1	6.28	2.89	10.78	1	Cj0748	hypothetical protein	NA	93	0	0	0	1	1	0	0	1		CATTGATGATTAATAAGCTTTTGTTGTTCTTTGTTTAGGTAGAATTCTATA
703156	'-'	1	1	6.28	2.89	10.78	1	Cj0752	pseudo	NA	1238	0	0	0	1	1	0	0	1		CATTGATGATTAATAAGCTTTTGTTGTTCTTTGTTTAGGTAGAATTCTATA
703520	'-'	1	1	30.31	7.7	11.8	1	Cj0752	pseudo	NA	1238	0	0	0	1	1	0	0	1		CGCATTTTAAAAAATGTATTCATAAGTCTAAATATCTTAAACTTAGTAGTA
707802	'+'	1	1	111.17	11.56	4.46	1	Cj0757	heat-inducible transcription repressor	38	795	1	0	0	0	1	0	0	0		TTTTATATTTATACTTGACAAAATAACACTCAATGTTGTATAATATATCTA
711215	'-'	1	1	4.8	>100	14.75	1	Cj0760	hypothetical protein	NA	1023	0	0	0	1	1	0	0	1		TAATTTTATTTTATTGTTAATTTTTTAGTTTGCTTACACTAAAATGAATTG
711296	'+'	1	1	5.26	5.25	2.32	1	Cj0760	hypothetical protein	18	1023	1	0	0	0	1	0	0	0		TTAACAATAAAATAAAATTAATCTAAAAACTTTTTAGATATAATCTTAATA
711474	'+'	1	1	17.37	5.27	4.54	1	Cj0760	hypothetical protein	NA	1023	0	0	1	0	1	0	0	0		TATAACTCCTAAAGTGTCTTTTAAAGAAATTTTGAGGTATTATTATCTTTA
716628	'-'	1	0	8.87	2.45	2	2	Cj0764c	arginine decarboxylase	16	1836	1	0	0	0	1	0	0	0		GTTTTATAAAAATTTAGCAAAAAAAGAAGAAAAAATGATTAAAATTTCAGA
716628	'-'	1	0	8.87	2.45	2	2	Cj0765c	histidyl-tRNA synthetase	NA	1227	0	0	1	0	1	0	0	0		GTTTTATAAAAATTTAGCAAAAAAAGAAGAAAAAATGATTAAAATTTCAGA
716915	'+'	1	1	4.03	>100	13.99	1	Cj0765c	histidyl-tRNA synthetase	NA	1227	0	0	0	1	1	0	0	1		TAAATTCCTTCTCTTTGAATCTTTTCTTCTTTTTGTTCTAAAATAGTTATA
716925	'+'	1	1	21.06	2.21	7.34	1	Cj0765c	histidyl-tRNA synthetase	NA	1227	0	0	0	1	1	0	0	1		CTCTTTGAATCTTTTCTTCTTTTTGTTCTAAAATAGTTATAATTCTTTCTA
720169	'-'	1	1	454.23	5.8	6.79	1	Cj0769c	flagellar basal body P-ring biosynthesis protein FlgA	30	663	1	0	0	0	1	0	0	0		TATACAAAGCCTTCTAAAGGCTTTGTTAAACTTATAAAAGCTAAAATACTA
720253	'-'	1	1	9.61	6.2	6.08	2	Cj0769c	flagellar basal body P-ring biosynthesis protein FlgA	114	663	0	1	0	0	1	0	0	0		ATTAAAGAAATTTTAACAAGCGATAAAATTAAAAATTTTATCATAGAAAAA
720253	'-'	1	1	9.61	6.2	6.08	2	Cj0770c	putative NLPA family lipoprotein	NA	777	0	0	1	0	1	0	0	0		ATTAAAGAAATTTTAACAAGCGATAAAATTAAAAATTTTATCATAGAAAAA
720829	'+'	1	1	10.72	>100	8.51	1	Cj0770c	putative NLPA family lipoprotein	NA	777	0	0	0	1	1	0	0	1		TTTGCATCTAAATCTTTTTCATTTAAAGCGATGTTAGGTATATTATAGTCA
720993	'-'	1	1	126.03	8.08	3.98	1	Cj0770c	putative NLPA family lipoprotein	NA	777	0	0	1	0	1	0	0	0		AACATTATAAAGATATATTAATCCCAGCTTTTTAGGAGTATAATATGAATA
723849	'+'	1	1	9.29	3.5	21.97	1	Cj0774c	ABC transporter ATP-binding protein	NA	1011	0	0	0	1	1	0	0	1		TTTCCATTCAGTTTTTCTATTTTACCCCAAACTATGTTAAAGTCTATATTT
724144	'+'	1	1	181.47	15.88	9.66	1	Cj0774c	ABC transporter ATP-binding protein	NA	1011	0	0	0	1	1	0	0	1		TAATCCCAAATTCAGCATTGATTTTAGATATAAGCTCTAAAATATTTTTTG
724920	'-'	1	1	89.8	7.4	6.11	2	Cj0774c	ABC transporter ATP-binding protein	211	1011	1	0	0	0	1	0	0	0		CAATATGTGATGTTAGCGAGAATTTAGAAATTTTTATTACGCTTGAAAATG
724920	'-'	1	1	89.8	7.4	6.11	2	Cj0775c	valyl-tRNA synthetase	NA	2613	0	0	1	0	1	0	0	0		CAATATGTGATGTTAGCGAGAATTTAGAAATTTTTATTACGCTTGAAAATG
724967	'+'	1	1	3.72	>100	3.4	1	Cj0775c	valyl-tRNA synthetase	NA	2613	0	0	0	1	1	0	0	1		CAACATTTTCAAGCGTAATAAAAATTTCTAAATTCTCGCTAACATCACATA
725040	'+'	1	1	3.7	>100	>100	1	Cj0775c	valyl-tRNA synthetase	NA	2613	0	0	0	1	1	0	0	1		ACTAAATTCTATTTGCTCGCACTTTGCGAGCATTATGATAAAATTCATATA
725606	'+'	1	1	1.85	>100	>100	1	Cj0775c	valyl-tRNA synthetase	NA	2613	0	0	0	1	1	0	0	1		TTAAAAGCAGATAATTTTTAGCATTATAAATTTTATTTGTAAAATTTCTAA
726206	'+'	1	1	5.57	10	8.29	1	Cj0775c	valyl-tRNA synthetase	NA	2613	0	0	0	1	1	0	0	1		TCATCCAAGCATTAAAGCTATTTATCCAGTGATTTGGGTAAAATTTACTTT
728404	'-'	1	1	898.48	3.98	6.41	2	Cj0776c	putative periplasmic protein	33	1023	1	0	0	0	1	0	0	1		AATATAAAAATTTAAAATTACTTTATATTAGATTATAGTACAATGCTAAAA
728404	'-'	1	1	898.48	3.98	6.41	2	Cj0777	putative ATP-dependent DNA helicase	NA	2031	0	0	0	1	1	0	0	1		AATATAAAAATTTAAAATTACTTTATATTAGATTATAGTACAATGCTAAAA
728412	'-'	1	1	5.54	16	>100	2	Cj0776c	putative periplasmic protein	41	1023	0	1	0	0	1	0	0	1		TACTTAAAAATATAAAAATTTAAAATTACTTTATATTAGATTATAGTACAA
728412	'-'	1	1	5.54	16	>100	2	Cj0777	putative ATP-dependent DNA helicase	NA	2031	0	0	0	1	1	0	0	1		TACTTAAAAATATAAAAATTTAAAATTACTTTATATTAGATTATAGTACAA
728480	'+'	1	1	8.5	3.3	6.08	1	Cj0777	putative ATP-dependent DNA helicase	20	2031	0	1	0	0	1	0	0	0		TAAAGTAATTTTAAATTTTTATATTTTTAAGTAATTTTTTTTTATAATTTT
728484	'+'	1	1	180.73	16.74	4.28	1	Cj0777	putative ATP-dependent DNA helicase	16	2031	1	0	0	0	1	0	0	0		GTAATTTTAAATTTTTATATTTTTAAGTAATTTTTTTTTATAATTTTAACT
729766	'-'	1	1	4.03	>100	>100	1	Cj0777	putative ATP-dependent DNA helicase	NA	2031	0	0	0	1	1	0	0	1		CAAATTTACATTTTTATCAGGATCTAAAAAACCTTTTATTAAATTTCCATG
730218	'+'	1	0	2.22	2	1.37	1	Cj0777	putative ATP-dependent DNA helicase	NA	2031	0	0	1	0	1	0	0	0		AAAGAGCTTACAAAAAATTATAGCGATATTTATAAGTATTATAATTTTTTA
730544	'+'	1	1	280.89	2.56	6	1	Cj0778	major antigenic peptide PEB2	25	738	1	0	0	0	1	0	0	0		AGCAGGGCTTTGCAAGGGAGAGTTAACTATAGATTGATACAATTTCCTTTA
730559	'-'	1	1	32.52	6.5	10.78	1	Cj0777	putative ATP-dependent DNA helicase	NA	2031	0	0	0	1	1	0	0	1		AAAAAACTTGCTGCTAAACTTAAAATTAATATTTTTTTCATAAAATAAACC
730559	'-'	1	1	32.52	6.5	10.78	1	Cj0778	major antigenic peptide PEB2	NA	738	0	0	0	1	1	0	0	1		AAAAAACTTGCTGCTAAACTTAAAATTAATATTTTTTTCATAAAATAAACC
731358	'+'	1	1	25.7	7.71	2.88	1	Cj0779	thiol peroxidase	47	528	1	0	0	0	1	0	0	0		TTTGAGTGAAATTAAAAAATAATTAATATTTATAGGATATAATTACTCCTA
732153	'+'	1	1	546.63	>100	2.16	1	Cj0780	nitrate reductase catalytic subunit	26	2775	1	0	0	0	1	0	0	0		TTTTATTAAAATTTCAAGAGATTTTTATACTCCATTTTTTATAATAAGATG
732399	'-'	1	1	5.17	>100	7.18	1	Cj0780	nitrate reductase catalytic subunit	NA	2775	0	0	0	1	1	0	0	1		CTTCACCATACATGATCTTAGCATTAAAATAACCTTTGATACAATTAAGTC
737940	'-'	1	1	4.44	>100	16.58	1	Cj0784	putative periplasmic protein	NA	915	0	0	0	1	1	0	0	1		ATAGCCTTTTTTAAATCATTTATATATTCTTCTTTTGCTAAAATCAAAACA
737940	'-'	1	1	4.44	>100	16.58	1	Cj0785	NapD protein	NA	339	0	0	0	1	1	0	0	1		ATAGCCTTTTTTAAATCATTTATATATTCTTCTTTTGCTAAAATCAAAACA
740231	'-'	1	1	3.33	5.38	>100	1	Cj0789	putative multifunctional Cca protein	NA	1119	0	0	0	1	1	0	0	1		GAATTTTACCACAAAATCCAGCATTTATGAAATCTTTTGCTAAAATTTTAC
740286	'+'	1	1	146.73	4.62	6.81	2	Cj0790	formyltetrahydrofolate deformylase	60	825	1	0	0	0	1	0	0	0		ATTTTAGCAAAAGATTTCATAAATGCTGGATTTTGTGGTAAAATTCTTGGT
740286	'+'	1	1	146.73	4.62	6.81	2	Cj0789	putative multifunctional Cca protein	NA	1119	0	0	1	0	1	0	0	0		ATTTTAGCAAAAGATTTCATAAATGCTGGATTTTGTGGTAAAATTCTTGGT
741171	'-'	1	1	21.44	>100	5.53	2	Cj0791c	putative aminotransferase	NA	1275	0	0	1	0	1	0	0	1		TATTGATTATTTTTTTAATGCTTTAAATAAAACTATAGTAAAATTATCGCA
741171	'-'	1	1	21.44	>100	5.53	2	Cj0790	formyltetrahydrofolate deformylase	NA	825	0	0	0	1	1	0	0	1		TATTGATTATTTTTTTAATGCTTTAAATAAAACTATAGTAAAATTATCGCA
742457	'-'	1	1	33.26	3.84	2.42	2	Cj0791c	putative aminotransferase	16	1275	1	0	0	0	1	0	0	1		TAAATTTTATATTTTTCCTTTTATAAAGCATTTTTATAGTATAATTTTAGC
742457	'-'	1	1	33.26	3.84	2.42	2	Cj0792	hypothetical protein	NA	879	0	0	0	1	1	0	0	1		TAAATTTTATATTTTTCCTTTTATAAAGCATTTTTATAGTATAATTTTAGC
742471	'+'	1	1	155.6	13	6.05	2	Cj0792	hypothetical protein	6	879	1	0	0	0	1	0	0	1		ATCTGAAATTTGCAAATACAATCCTTATAAAAATTTGCTAAAATTATACTA
742471	'+'	1	1	155.6	13	6.05	2	Cj0791c	putative aminotransferase	NA	1275	0	0	0	1	1	0	0	1		ATCTGAAATTTGCAAATACAATCCTTATAAAAATTTGCTAAAATTATACTA
742816	'+'	1	1	3.41	4.67	2.32	1	Cj0792	hypothetical protein	NA	879	0	0	1	0	1	0	0	0		AAGCTTTATCTACACTTAAATATCTTTTAGAAACAGGTATAATAAAACTTG
743245	'-'	1	1	3.33	>100	10.21	1	Cj0792	hypothetical protein	NA	879	0	0	0	1	1	0	0	1		TATTTTATCAATTTCCTTGCTAAAACCATTTTTTGAGATTATAATGTAATA
743621	'+'	1	1	14.41	>100	3.1	1	Cj0793	signal transduction histidine kinase	NA	1020	0	0	1	0	1	0	0	0		ACAAAATCAAGAAGCCTTGAAAAATCCAAAATTACTTAGTATCATTAGTCT
743946	'-'	1	1	4.07	6.5	14.75	1	Cj0793	signal transduction histidine kinase	NA	1020	0	0	0	1	1	0	0	1		ATGGCACTTTCACACTCTTCTTTTAACTCTAAAAGATTAAAATTTAAAGCA
744115	'+'	1	0	5.54	>100	1.93	1	Cj0793	signal transduction histidine kinase	NA	1020	0	0	1	0	1	0	0	0		ATAAAGCTCTTCTTGGTTTGGTTTTGCAAAATTTGATTTATAATGCTATTG
744349	'-'	1	1	11.09	2.81	10.66	1	Cj0793	signal transduction histidine kinase	NA	1020	0	0	0	1	1	0	0	1		GGGGTGAAAAGAAAATATTTATCACACCAAAGGTAAGGTAAAATAAAAATT
744420	'-'	1	1	5.91	>100	6.22	1	Cj0793	signal transduction histidine kinase	NA	1020	0	0	0	1	1	0	0	1		TTCCTTGATTTAGATTTTTTGCCTTCAACCTAAATATATTAAAATAATATA
744420	'-'	1	1	5.91	>100	6.22	1	Cj0794	hypothetical protein	NA	1281	0	0	0	1	1	0	0	1		TTCCTTGATTTAGATTTTTTGCCTTCAACCTAAATATATTAAAATAATATA
744431	'+'	1	1	361.96	76.33	2.92	1	Cj0794	hypothetical protein	64	1281	1	0	0	0	1	0	0	0		AATATTTTCTTTTCACCCCAAAACGGAACAGATCTTGCTTATATTATTTTA
745010	'-'	1	1	8.13	3.2	7.26	1	Cj0794	hypothetical protein	NA	1281	0	0	0	1	1	0	0	1		GTATCATTAAAAGCATAATTAACAATTTGATTAAATTGATTATAATATTGT
745177	'-'	1	1	4.44	>100	>100	1	Cj0794	hypothetical protein	NA	1281	0	0	0	1	1	0	0	1		TTCCTAATTGTTCTGCTTCATTATATTGCTCTTGTGTATTATAATAGTTTG
745658	'-'	1	1	25.87	65	4.14	1	Cj0794	hypothetical protein	NA	1281	0	0	0	1	1	0	0	1		CTTTCACTGCTTGCTTTCCAACCATTAGCTTTTACTTGATTAAATTCTCTA
746335	'-'	1	1	191.08	13.61	3.18	1	Cj0795c	UDP-N-acetylmuramoyl-tripeptide D-alanyl-D-alanine ligase	NA	1428	0	0	1	0	1	0	0	0		TCTTATTCATTCAAGTCTTGAAGGTTTAGAATTTAAAGTCGATATAGAAAA
748151	'+'	1	1	59.87	>100	14.74	1	Cj0797c	hypothetical protein	NA	216	0	0	0	1	1	0	0	1		TTCCACTTTCGCTTTTTTTGAGTTTTTCCATAATGGGGCTAAAATTTCTTA
748226	'-'	1	0	41.8	4.38	1.78	1	Cj0797c	hypothetical protein	29	216	1	0	0	0	1	0	0	0		GACAAAAAGGAAAATTATAAGCTTTTAAGTCAAAATGCGCTAAATTATACA
748870	'+'	1	1	4.07	>100	13.26	1	Cj0798c	D-alanyl-alanine synthetase A	NA	1041	0	0	0	1	1	0	0	1		TAAGCTTTTCTTTAGAGTTTTGATTTTTTCTTAGTATGGTATAATCAAGTG
749322	'+'	1	1	3.33	10	14.92	1	Cj0798c	D-alanyl-alanine synthetase A	NA	1041	0	0	0	1	1	0	0	1		CCGCCAAAAAGTATTGCAAATTTCATTTTATTCCTTTATCCTAGTTTTTTA
749322	'+'	1	1	3.33	10	14.92	1	Cj0799c	Holliday junction DNA helicase RuvA	NA	552	0	0	0	1	1	0	0	1		CCGCCAAAAAGTATTGCAAATTTCATTTTATTCCTTTATCCTAGTTTTTTA
751718	'-'	1	1	1014.9	6.92	9.4	2	Cj0800c	putative ATPase	25	1860	1	0	0	0	1	0	0	1		AAGAGAACTATTTTAACTAAAATTGATTAAAAATTGACTATAATTACATTC
751718	'-'	1	1	1014.9	6.92	9.4	2	Cj0801	putative integral membrane protein	NA	1452	0	0	0	1	1	0	0	1		AAGAGAACTATTTTAACTAAAATTGATTAAAAATTGACTATAATTACATTC
751766	'+'	1	1	210.3	2.04	8.66	2	Cj0801	putative integral membrane protein	31	1452	1	0	0	0	1	0	0	1		AAGAATGTAATTATAGTCAATTTTTAATCAATTTTAGTTAAAATAGTTCTC
751766	'+'	1	1	210.3	2.04	8.66	2	Cj0800c	putative ATPase	NA	1860	0	0	0	1	1	0	0	1		AAGAATGTAATTATAGTCAATTTTTAATCAATTTTAGTTAAAATAGTTCTC
753126	'+'	1	1	8.5	24	2.96	2	Cj0802	cysteinyl-tRNA synthetase	122	1389	1	0	0	0	1	0	0	0		GAGCTAATATCAAAGAATTTGGTTTTAAGAAATTTTTTGCTTTAATATCTA
753126	'+'	1	1	8.5	24	2.96	2	Cj0801	putative integral membrane protein	NA	1452	0	0	1	0	1	0	0	0		GAGCTAATATCAAAGAATTTGGTTTTAAGAAATTTTTTGCTTTAATATCTA
756388	'+'	1	1	8.5	>100	4.37	1	Cj0804	dihydroorotate dehydrogenase 2	15	1059	1	0	0	0	1	0	0	0		AAGCAAAGAAAAAACAAAGCCCAGCTTTAGTTAATTTTAGTTAGAATTTCA
758052	'+'	1	1	10.22	2.83	2.35	1	Cj0805	putative zinc protease	NA	1251	0	0	1	0	1	0	0	0		ATTATCAACCTAAAAATGCGATTTTACTTGTAAGTGGCGATATAGAAAGTA
758306	'-'	1	1	2.22	>100	>100	1	Cj0805	putative zinc protease	NA	1251	0	0	0	1	1	0	0	1		TCTATACAATCATTAACATAAGCATAATAATCATTGATTAAATTTAATTTA
759776	'+'	1	0	9.61	6.2	1.01	1	Cj0807	7-alpha-hydroxysteroid dehydrogenase	NA	780	0	0	1	0	1	0	0	0		ATTGCTGATGAAATGGTTCAAGATTTGGAGAAAAATTATAAAATCAAAGCT
759890	'+'	1	0	31.79	6.73	0.91	1	Cj0807	7-alpha-hydroxysteroid dehydrogenase	NA	780	0	0	1	0	1	0	0	0		GTGGATTTTGATAGAGTGGATTATTTTATCTCAAATGCTATCATTTCAGGA
761370	'-'	1	1	283.48	18.84	9.57	2	Cj0809c	putative hydrolase	40	597	1	0	0	0	1	0	0	1		ATCTTTTGCCAATCCATAAAGCTTGCCTTTTAAAAATTTAATGTATAATTA
761370	'-'	1	1	283.48	18.84	9.57	2	Cj0810	NAD synthetase	NA	741	0	0	0	1	1	0	0	1		ATCTTTTGCCAATCCATAAAGCTTGCCTTTTAAAAATTTAATGTATAATTA
761379	'+'	1	1	402.12	>100	5.93	2	Cj0810	NAD synthetase	25	741	1	0	0	0	1	0	0	1		ATTTTTTGCCTCTTTAATAAAAAATTTGCCTTAAATAAATATAATTATACA
761379	'+'	1	1	402.12	>100	5.93	2	Cj0809c	putative hydrolase	NA	597	0	0	0	1	1	0	0	1		ATTTTTTGCCTCTTTAATAAAAAATTTGCCTTAAATAAATATAATTATACA
762949	'+'	1	1	46.2	2.59	5.12	2	Cj0812	threonine synthase	122	1413	1	0	0	0	1	0	0	0		AAGAATTAGAAAATTTGCTAAAAAAACATAATTGCGATACACTAATGCTTA
762949	'+'	1	1	46.2	2.59	5.12	2	Cj0811	tetraacyldisaccharide 4%27-kinase	NA	927	0	0	1	0	1	0	0	0		AAGAATTAGAAAATTTGCTAAAAAAACATAATTGCGATACACTAATGCTTA
765229	'-'	1	1	3.7	>100	2.84	1	Cj0813	3-deoxy-manno-octulosonate cytidylyltransferase	NA	720	0	0	0	1	1	0	0	1		TTCCTTGATTTAGATTTTTTGCCTTCAACCTAAATATATTAAAATAATATA
765229	'-'	1	1	3.7	>100	2.84	1	Cj0814	hypothetical protein	NA	756	0	0	0	1	1	0	0	1		TTCCTTGATTTAGATTTTTTGCCTTCAACCTAAATATATTAAAATAATATA
765240	'+'	1	1	361.96	66.29	2.95	1	Cj0814	hypothetical protein	64	756	1	0	0	0	1	0	0	0		AGAAAAATAACTCCACCCCAAAACGGAACAAATTTTGCTTATATTATTTTA
766669	'+'	1	1	32.15	>100	3.19	1	Cj0817	putative glutamine binding periplasmic protein	23	771	1	0	0	0	1	0	0	0		TGAAATAAATTGCTAATAACAAAATAAGATAAAACTAGTATAATTTTTTTA
767448	'+'	1	1	4.07	>100	2.95	2	Cj0818	putative lipoprotein	107	228	0	1	0	0	1	0	0	0		GCAATAAGTATTTAAAAGACATTAAAGAAGTTTTTAAGCAAAATAATATCA
767448	'+'	1	1	4.07	>100	2.95	2	Cj0817	putative glutamine binding periplasmic protein	NA	771	0	0	1	0	1	0	0	0		GCAATAAGTATTTAAAAGACATTAAAGAAGTTTTTAAGCAAAATAATATCA
767524	'+'	1	1	6.28	2.7	7.66	1	Cj0818	putative lipoprotein	31	228	1	0	0	0	1	0	0	0		AATATTGATAATTAATATTAATTTTATGAATTTTGATATACAATATCATTA
768512	'+'	1	1	3.33	>100	12.48	1	Cj0820c	flagellar biosynthesis protein FliP	NA	735	0	0	0	1	1	0	0	1		TCCATGATAAAAAAAGTTAAAATTAAAGCCAAGGTTACTAAAATGGTATTA
768876	'+'	1	1	1733.39	10.27	8.08	1	Cj0821	bifunctional N-acetylglucosamine-1-phosphate uridyltransferase%2Fglucosamine-1-phosphate acetyltransferase	30	1290	1	0	0	0	1	0	0	0		AAACTAGTTTAAGGGTATTAGGATTTTAACTTTAAACTGCTAAAATAGTCT
773349	'+'	1	1	92.4	42.67	5.01	2	Cj0826	putative integral membrane protein	56	1026	1	0	0	0	1	0	0	0		TTTTTTTTAGAATTAAAGCAATAAAAGAGCAAGAACTTGCTATGATACCCT
773349	'+'	1	1	92.4	42.67	5.01	2	Cj0825	putative processing peptidase	NA	777	0	0	1	0	1	0	0	0		TTTTTTTTAGAATTAAAGCAATAAAAGAGCAAGAACTTGCTATGATACCCT
773392	'-'	1	1	1.55	>100	>100	1	Cj0825	putative processing peptidase	NA	777	0	0	0	1	1	0	0	1		AAAAATTGATTTAAAACATATCTTAAACTAAGCTTCATTAGAATAATCCTA
773392	'-'	1	1	1.55	>100	>100	1	Cj0826	putative integral membrane protein	NA	1026	0	0	0	1	1	0	0	1		AAAAATTGATTTAAAACATATCTTAAACTAAGCTTCATTAGAATAATCCTA
774952	'-'	1	1	4.03	>100	5.11	1	Cj0827	tRNA pseudouridine synthase A	NA	726	0	0	0	1	1	0	0	1		CCCTCTTAAAAAACCATTAGCTTTAAAATGAAAAATGCTAAAATCTTTATA
775195	'+'	1	1	8.87	8	26.52	1	Cj0828c	threonine dehydratase	NA	1212	0	0	0	1	1	0	0	1		GTTATTAAAAACTTTCATAGAAATTAAAAGCCTTTTGGGTTAAAATTTTTC
776382	'-'	1	1	55.44	>100	2.79	2	Cj0828c	threonine dehydratase	22	1212	1	0	0	0	1	0	0	0		ATTAGATATAAATTTTATACAAAATCGTTGCATTATGCTAGAATATCCGCA
776382	'-'	1	1	55.44	>100	2.79	2	Cj0829c	putative CoA binding domain containing protein	NA	414	0	0	1	0	1	0	0	0		ATTAGATATAAATTTTATACAAAATCGTTGCATTATGCTAGAATATCCGCA
776786	'-'	1	1	66.53	3.54	2.93	1	Cj0829c	putative CoA binding domain containing protein	13	414	1	0	0	0	1	0	0	0		TTTGAATTCACTTTAGTTAATTTTTTAATCATTTAAGATAAAATACCAAAA
776863	'+'	1	1	355.8	14.06	2.83	2	Cj0830	putative integral membrane protein	29	417	1	0	0	0	1	0	0	1		AAAATTAACTAAAGTGAATTCAAAAAATGAAAAAAGTGTTATAATATAGCA
776863	'+'	1	1	355.8	14.06	2.83	2	Cj0829c	putative CoA binding domain containing protein	NA	414	0	0	0	1	1	0	0	1		AAAATTAACTAAAGTGAATTCAAAAAATGAAAAAAGTGTTATAATATAGCA
778232	'+'	1	1	12.2	34	9.64	1	Cj0831c	tRNA %28uracil-5-%29-methyltransferase	NA	1074	0	0	0	1	1	0	0	1		GATCAAACATTGCATAAAAAAGCGTATCATTTTCATGATAAAATGAAAGTT
778651	'+'	1	1	11.83	>100	4.64	1	Cj0832c	putative Na%2B%2FH%2B antiporter family protein	NA	1734	0	0	0	1	1	0	0	1		AAATCGCACCTGTTAAAACGCAGCTTATATTAATAACCATATAATGATGCA
784713	'+'	1	1	28.8	2.22	9.69	2	Cj0836	methylated-DNA--protein-cysteine methyltransferase	17	453	1	0	0	0	1	0	0	1		GCATAAAAGACATTTTCTACTCCTTAAATATTTTTTATTATAATTGTAGCT
784713	'+'	1	1	28.8	2.22	9.69	2	Cj0835c	bifunctional aconitate hydratase 2%2F2-methylisocitrate dehydratase	NA	2547	0	0	0	1	1	0	0	1		GCATAAAAGACATTTTCTACTCCTTAAATATTTTTTATTATAATTGTAGCT
784731	'-'	1	1	6.65	19	20.72	2	Cj0835c	bifunctional aconitate hydratase 2%2F2-methylisocitrate dehydratase	56	2547	1	0	0	0	1	0	0	1		CACTATGTAAAGATAGGTAACATAAAGGCATTTTATAATAAACTTTAAACA
784731	'-'	1	1	6.65	19	20.72	2	Cj0836	methylated-DNA--protein-cysteine methyltransferase	NA	453	0	0	0	1	1	0	0	1		CACTATGTAAAGATAGGTAACATAAAGGCATTTTATAATAAACTTTAAACA
784817	'+'	1	1	12.57	7	3.33	1	Cj0836	methylated-DNA--protein-cysteine methyltransferase	NA	453	0	0	1	0	1	0	0	0		TATCTTTACATAGTGATGGAAAATTTTTAACTAGAGTCGATTTTTGTGATA
785784	'+'	1	1	6.5	>100	18.24	1	Cj0837c	hypothetical protein	NA	942	0	0	0	1	1	0	0	1		GTTTTTCAAAATCAGCAAAAATATTTCCTTTTAAAATGTTAAAATAAAAAG
786677	'+'	1	1	4.44	7	17.02	1	Cj0838c	methionyl-tRNA synthetase	NA	1887	0	0	0	1	1	0	0	1		TTTGGTAGAGTAGGGCTTAATAAAAGGCTTGTTTTGGCTAAAATATTTGCA
787019	'+'	1	1	5.26	8	33.15	1	Cj0838c	methionyl-tRNA synthetase	NA	1887	0	0	0	1	1	0	0	1		AGCTCTGCATTGATACGATTTATCAGCATATTTTCGCTAAAATCCCCATCG
787260	'-'	1	0	12.08	14	1.55	1	Cj0838c	methionyl-tRNA synthetase	NA	1887	0	0	1	0	1	0	0	0		TGTAAGCTCACTTGACTTTCAAAACAAGGGAGAAAATGCTAAATTTTGGCC
790541	'-'	1	1	15.15	21.5	2.44	1	Cj0843c	putative secreted transglycosylase	NA	1626	0	0	1	0	1	0	0	0		CATATTAGAACGCAAAAATAATTTTAAAAAACATTATTTTATAATGCCTTA
792340	'+'	1	1	83.53	>100	10.87	1	Cj0845c	glutamylglutaminyl-tRNA synthetase	NA	1296	0	0	0	1	1	0	0	1		CATTTTGATATGTTCACGATTGATTTGTAAGAGTTTTTTAAGATCAAATCT
792562	'-'	1	0	6.28	6.67	0.81	1	Cj0845c	glutamylglutaminyl-tRNA synthetase	NA	1296	0	0	1	0	1	0	0	0		ACACTCCAAAACAAGAACATATCCGCGCAAGCTTAGGTTATAATAAAGCCA
793246	'-'	1	1	551.06	2.2	9.53	2	Cj0845c	glutamylglutaminyl-tRNA synthetase	27	1296	1	0	0	0	1	0	0	1		TATAACCAAGTAAAATTAAATATCCGTATAAATTTTTCTGTTATAATAAGC
793246	'-'	1	1	551.06	2.2	9.53	2	Cj0846	putative metallophosphoesterase	NA	1125	0	0	0	1	1	0	0	1		TATAACCAAGTAAAATTAAATATCCGTATAAATTTTTCTGTTATAATAAGC
793305	'+'	1	1	247.63	>100	10.47	2	Cj0846	putative metallophosphoesterase	0	1125	1	0	0	0	1	0	0	1		AACAGAAAAATTTATACGGATATTTAATTTTACTTGGTTATAATACTTTTA
793305	'+'	1	1	247.63	>100	10.47	2	Cj0845c	glutamylglutaminyl-tRNA synthetase	NA	1296	0	0	0	1	1	0	0	1		AACAGAAAAATTTATACGGATATTTAATTTTACTTGGTTATAATACTTTTA
794647	'-'	1	1	2.96	>100	>100	1	Cj0847	phosphatidylserine decarboxylase	NA	801	0	0	0	1	1	0	0	1		AAATGTTCTTCATTTGCTAAAAAAGTACTTCCACACTCTAAAATTTTACCA
795693	'+'	1	1	50.63	52	7.94	1	Cj0849c	hypothetical protein	NA	2160	0	0	0	1	1	0	0	1		TTTTCATAGATGGTTTTTCTAAATTCAATATTTTCTGCCATAATATTAATA
796647	'+'	1	1	6.65	>100	>100	1	Cj0849c	hypothetical protein	NA	2160	0	0	0	1	1	0	0	1		GATGCTTTTATATGTTTTTCTTCATCTTGGTTTTTTGTGTTATGATTAAGT
797001	'+'	1	1	18.85	52	14.75	1	Cj0849c	hypothetical protein	NA	2160	0	0	0	1	1	0	0	1		TTAGAACTTAAATTTAAAAGTGCTTTAAAAGAACTTTGATTTAAAATTTGC
797029	'+'	1	1	62.46	2.51	10.99	1	Cj0849c	hypothetical protein	NA	2160	0	0	0	1	1	0	0	1		AAGAACTTTGATTTAAAATTTGCTTATTTTCATTTTTGCTAGAATTAATAA
797496	'+'	1	1	4.07	>100	>100	1	Cj0849c	hypothetical protein	NA	2160	0	0	0	1	1	0	0	1		TTTAATTTGGTACCTGTTTCATTTTGAACAAATTTTGCTAGTATTTCCTCA
799029	'-'	1	1	124.55	11	4.91	2	Cj0850c	putative MFS transport protein	189	1188	1	0	0	0	1	0	0	0		AAATTTATCAAAAATTATTCATTTTAAAGTTCTAAAAGACGATTTAAAGCC
799029	'-'	1	1	124.55	11	4.91	2	Cj0851c	putative integral membrane protein	NA	504	0	0	1	0	1	0	0	0		AAATTTATCAAAAATTATTCATTTTAAAGTTCTAAAAGACGATTTAAAGCC
799688	'-'	1	1	2149.93	7.81	5.68	2	Cj0852c	putative integral membrane protein	38	330	1	0	0	0	1	0	0	0		AATTTGAAACAGGCTTTATATGTTCAAAAATGGATGATAAAATTATAGATA
799688	'-'	1	1	2149.93	7.81	5.68	2	Cj0853c	glutamate-1-semialdehyde aminotransferase	NA	1275	0	0	1	0	1	0	0	0		AATTTGAAACAGGCTTTATATGTTCAAAAATGGATGATAAAATTATAGATA
801287	'-'	1	1	117.53	2.75	4.18	2	Cj0854c	putative periplasmic protein	22	348	1	0	0	0	1	0	0	1		CTTCTATAAATTTAATCACTTTTTTAAAGTAAAAATTGTATCATATTAAAA
801287	'-'	1	1	117.53	2.75	4.18	2	Cj0855	bifunctional 5%2C10-methylene-tetrahydrofolate dehydrogenase%2F 5%2C10-methylene-tetrahydrofolate cyclohydrolase	NA	849	0	0	0	1	1	0	0	1		CTTCTATAAATTTAATCACTTTTTTAAAGTAAAAATTGTATCATATTAAAA
801298	'+'	1	1	3.41	>100	11.6	2	Cj0855	bifunctional 5%2C10-methylene-tetrahydrofolate dehydrogenase%2F 5%2C10-methylene-tetrahydrofolate cyclohydrolase	47	849	0	1	0	0	1	0	0	1		CATTAAAACAATTTTCAAAGTTTCACCTTGTTAATGAAGTTTTAATATGAT
801298	'+'	1	1	3.41	>100	11.6	2	Cj0854c	putative periplasmic protein	NA	348	0	0	0	1	1	0	0	1		CATTAAAACAATTTTCAAAGTTTCACCTTGTTAATGAAGTTTTAATATGAT
801303	'+'	1	1	30.35	9.91	6.45	2	Cj0855	bifunctional 5%2C10-methylene-tetrahydrofolate dehydrogenase%2F 5%2C10-methylene-tetrahydrofolate cyclohydrolase	42	849	0	1	0	0	1	0	0	1		AAACAATTTTCAAAGTTTCACCTTGTTAATGAAGTTTTAATATGATACAAT
801303	'+'	1	1	30.35	9.91	6.45	2	Cj0854c	putative periplasmic protein	NA	348	0	0	0	1	1	0	0	1		AAACAATTTTCAAAGTTTCACCTTGTTAATGAAGTTTTAATATGATACAAT
801310	'+'	1	1	70.96	2.81	7.42	2	Cj0855	bifunctional 5%2C10-methylene-tetrahydrofolate dehydrogenase%2F 5%2C10-methylene-tetrahydrofolate cyclohydrolase	35	849	1	0	0	0	1	0	0	1		TTTCAAAGTTTCACCTTGTTAATGAAGTTTTAATATGATACAATTTTTACT
801310	'+'	1	1	70.96	2.81	7.42	2	Cj0854c	putative periplasmic protein	NA	348	0	0	0	1	1	0	0	1		TTTCAAAGTTTCACCTTGTTAATGAAGTTTTAATATGATACAATTTTTACT
805512	'-'	1	1	538.87	42.38	6.45	1	Cj0858c	UDP-N-acetylglucosamine 1-carboxyvinyltransferase	26	1257	1	0	0	0	1	0	0	0		AACAAGCTTGATTATATTTTTTCAAAAGTTTAAGAATGCTATAATGATGCA
805516	'-'	1	0	11.83	33	1.76	1	Cj0858c	UDP-N-acetylglucosamine 1-carboxyvinyltransferase	30	1257	0	1	0	0	1	0	0	0		AGCCAACAAGCTTGATTATATTTTTTCAAAAGTTTAAGAATGCTATAATGA
806007	'-'	1	1	448.69	6.04	4.09	2	Cj0859c	hypothetical protein	27	429	1	0	0	0	1	0	0	1		ATTATTTTAAATTATAGTATATTTTTTTAAAATAATGTCGATTTAGTGTAA
806007	'-'	1	1	448.69	6.04	4.09	2	Cj0860	putative integral membrane protein	NA	873	0	0	0	1	1	0	0	1		ATTATTTTAAATTATAGTATATTTTTTTAAAATAATGTCGATTTAGTGTAA
806052	'+'	1	1	115.68	40.13	11.04	2	Cj0860	putative integral membrane protein	23	873	1	0	0	0	1	0	0	1		ATATATTACACTAAATCGACATTATTTTAAAAAAATATACTATAATTTAAA
806052	'+'	1	1	115.68	40.13	11.04	2	Cj0859c	hypothetical protein	NA	429	0	0	0	1	1	0	0	1		ATATATTACACTAAATCGACATTATTTTAAAAAAATATACTATAATTTAAA
808609	'+'	1	1	4.34	>100	7.74	1	Cj0862c	para-aminobenzoate synthase component I	NA	1785	0	0	0	1	1	0	0	1		TTGAATTTCAAAAAGTTTGGTTTTTAAGCTTTTTTTTGTGATGATTTTTGA
808629	'-'	1	1	4.07	>100	2.49	1	Cj0862c	para-aminobenzoate synthase component I	NA	1785	0	0	1	0	1	0	0	0		TTTCTTGCAAAATGATACAAAAAATCTGAGTGAAAATGTTATGATTTGTGA
809350	'+'	1	1	4.07	>100	>100	1	Cj0862c	para-aminobenzoate synthase component I	NA	1785	0	0	0	1	1	0	0	1		GTGCGGCAAGTTTTAATTTATCATTATCAAAATGAGTGTAAATTCTTGAGG
809350	'+'	1	1	4.07	>100	>100	1	Cj0863c	DNA recombinase	NA	1065	0	0	0	1	1	0	0	1		GTGCGGCAAGTTTTAATTTATCATTATCAAAATGAGTGTAAATTCTTGAGG
810377	'-'	1	1	173.34	2.65	8.63	1	Cj0863c	DNA recombinase	42	1065	1	0	0	0	1	0	0	0		CTTTTTCCTAAAAAAGCTTTTTTTTACTAAGTTAATACTAAAATACCTTTT
810910	'+'	1	1	143.77	56.57	4.11	1	Cj0864	putative periplasmic protein	53	360	1	0	0	0	1	0	0	0		ATAAAATTTTTTAAGAATATTTTTATTTTAATATTTTTATAATAGTTATTA
811514	'+'	1	1	5.17	>100	2.13	1	Cj0865	putative disulfide oxidoreductase	NA	801	0	0	1	0	1	0	0	0		TGAAACCTTGTGAACAATGTGTGTATATAAGATTTGATATGCTTGTTATGG
812080	'-'	1	1	82.05	2.9	5.91	1	Cj0865	putative disulfide oxidoreductase	NA	801	0	0	0	1	1	0	0	1		GACATCCTATTTTAAGAGTATCTTAAAACGACTTGATTTAAACTAGCTATA
812080	'-'	1	1	82.05	2.9	5.91	1	Cj0866	pseudo	NA	1437	0	0	0	1	1	0	0	1		GACATCCTATTTTAAGAGTATCTTAAAACGACTTGATTTAAACTAGCTATA
812484	'+'	1	1	10.44	30	5.53	1	Cj0866	pseudo	NA	1437	0	0	1	0	1	0	0	0		TATTTTTGGACTTTATCCTTCTTATAGTAAAGGTAAGTTATACTAAAACCG
813646	'+'	1	0	7.74	2.04	1.98	1	Cj0872	putative protein disulphide isomerase	29	642	1	0	0	0	1	0	0	0		GCCCAAATTTATTTTTGGGTTTATTTATTTTTTTTAAATAAAATTATCTTT
815366	'-'	1	0	79.09	2.68	1.71	1	Cj0876c	putative periplasmic protein	29	288	1	0	0	0	1	0	0	0		ATGTAATTAGGTTTTATTGACTTTTTCTAAATAAAGTCTTATACTGAATTT
815437	'-'	1	1	8.87	>100	13.61	2	Cj0876c	putative periplasmic protein	100	288	0	1	0	0	1	0	0	0		GCTTTAAATATATAAGTTCTATTTTAAATATAAACGAATATTATTTTAAGG
815437	'-'	1	1	8.87	>100	13.61	2	Cj0877c	hypothetical protein	NA	93	0	0	1	0	1	0	0	0		GCTTTAAATATATAAGTTCTATTTTAAATATAAACGAATATTATTTTAAGG
815519	'+'	1	1	1021.57	4.68	8.49	2	Cj0878	hypothetical protein	26	147	1	0	0	0	1	0	0	1		GAACTTATATATTTAAAGCAAAAATAAAGTTTTTTCGCTATAATAAAATCT
815519	'+'	1	1	1021.57	4.68	8.49	2	Cj0877c	hypothetical protein	NA	93	0	0	0	1	1	0	0	1		GAACTTATATATTTAAAGCAAAAATAAAGTTTTTTCGCTATAATAAAATCT
815943	'-'	1	1	29.94	5.05	3.1	1	Cj0879c	putative periplasmic protein	NA	633	0	0	1	0	1	0	0	0		TTTACAAAATTTGAAAAATACCATGCAGGATATTATGATATATTATAAACT
817662	'-'	1	1	240.61	55.25	5.01	2	Cj0881c	hypothetical protein	92	1047	1	0	0	0	1	0	0	0		TTGAACCGCAGCTTAGAAAATTCATTGCTGATATTTGTTATAATTTTAGCA
817662	'-'	1	1	240.61	55.25	5.01	2	Cj0882c	flagellar biosynthesis protein FlhA	NA	2175	0	0	1	0	1	0	0	0		TTGAACCGCAGCTTAGAAAATTCATTGCTGATATTTGTTATAATTTTAGCA
820179	'-'	1	1	1033.01	42.72	7.55	1	Cj0883c	putative transcriptional regulator	29	411	1	0	0	0	1	0	0	0		TTTGTCAAAATTTAAGTCTTTTTCTAAGAATTATTTATTATAATTACAGCT
820287	'+'	1	1	5561.64	28.76	8.06	1	Cj0884	30S ribosomal protein S15	38	273	1	0	0	0	1	0	0	0		AAAAAAGATAAATTCAGTTTATTTTTTGCTTTTTAAGATAAAATTACAGTT
823610	'-'	1	1	560.67	5.24	9.25	1	Cj0886c	putative cell division protein	87	2841	1	0	0	0	1	0	0	0		TCAACTTAGCTTATTAAATTATATGTAAAATTTTTTATGGTATAATTTGGC
823615	'-'	1	1	36.59	25.75	4.67	1	Cj0886c	putative cell division protein	92	2841	0	1	0	0	1	0	0	0		ATTTCTCAACTTAGCTTATTAAATTATATGTAAAATTTTTTATGGTATAAT
824242	'+'	1	1	45.83	>100	15.63	1	Cj0887c	lagellar hook-associated protein FlgL	NA	2253	0	0	0	1	1	0	0	1		ACAGTAGCTTGTGAATCTTTCATGAGTTGTTGTATTTGGGTATAATCTGCA
824530	'+'	1	1	3.72	1.92	>100	1	Cj0887c	lagellar hook-associated protein FlgL	NA	2253	0	0	0	1	1	0	0	1		TTTCCACCTTTGGAATTGACTTTTAAATTTAAAGTAGTACCATTTAGGCTA
824919	'-'	1	1	42.5	39.33	3.82	1	Cj0887c	lagellar hook-associated protein FlgL	NA	2253	0	0	1	0	1	0	0	0		TTCAAATTACAGATCTAAAGCAAGGTAATAATAAACTCGATTTTCATGCTG
825930	'-'	1	1	30.66	3.14	4.08	1	Cj0887c	lagellar hook-associated protein FlgL	45	2253	0	1	0	0	1	0	0	0		TAAAATTATATAATTTAAATTTTTGGAACAGTTATTGCTTTTGTTTATTAG
826048	'+'	1	1	128.62	39	6.26	1	Cjp16	tRNA-Leu	18	87	1	0	0	0	1	0	0	0		TACTTTTTATTTTTAAAGTATTTTTTAGCCTAAAAAAGTATAATTTTAGCT
826163	'+'	1	1	413.24	39.13	3.76	1	Cjp17	tRNA-Gly	0	75	1	0	0	0	1	0	0	0		GGGCAACCTTGTGTCGGTTCGAGTCCGACCTCGGGCACCACTTATTTTTTG
826619	'+'	1	1	6.28	9	5.96	1	Cj0888c	ABC transporter ATP-binding protein	NA	1932	0	0	0	1	1	0	0	1		TCTTTTTCATTTTCAAGATATTCAGTATAAAGAGTGTGTAAAATATTTATA
830477	'-'	1	1	19.22	53	2.68	1	Cj0891c	D-3-phosphoglycerate dehydrogenase	NA	1584	0	0	1	0	1	0	0	0		GGAGTTGAATTATCTTGCGAAACTCTTCCAAATAGTGGTTATAATAATAAA
830780	'+'	1	1	5.54	>100	14.92	1	Cj0891c	D-3-phosphoglycerate dehydrogenase	NA	1584	0	0	0	1	1	0	0	1		GGAGCTACAAAAGGTGGTAAATCTTCAGTTTTAATTGGTAAATTTAAGGCA
831221	'+'	1	1	3.72	>100	>100	1	Cj0891c	D-3-phosphoglycerate dehydrogenase	NA	1584	0	0	0	1	1	0	0	1		TCTGTAATCTTAGAAGCAGAAATATACGGATCATAGGCTAAAATTTTCATA
833001	'+'	1	1	3.72	>100	10.78	1	Cj0893c	30S ribosomal protein S1	NA	1671	0	0	0	1	1	0	0	1		CCTAAATCCACAAAAGCACCATAAGGCTCTATATTTGATACTATTACTTTA
833903	'-'	1	1	4484.28	>100	6.8	1	Cj0893c	30S ribosomal protein S1	30	1671	1	0	0	0	1	0	0	0		AAAATAAAAAAACTTAACACTAATTAAAGAAAAATAAGGTAAAATCAATCA
834632	'-'	1	1	72.07	4.61	6.14	1	Cj0894c	4-hydroxy-3-methylbut-2-enyl diphosphate reductase	NA	834	0	0	1	0	1	0	0	0		TTGGAAAATATACAAGCTTTAAGTAATGAAAAAAAGGCTATTATAAGAACT
835890	'+'	1	1	8.5	>100	3.87	1	Cj0895c	3-phosphoshikimate 1-carboxyvinyltransferase	NA	1287	0	0	0	1	1	0	0	1		GTTCCTGAATTTCCACAGTCTAAAATACAATTTGGAGATAAAATTTCTTTA
835990	'+'	1	1	38.07	3.24	7.97	1	Cj0895c	3-phosphoshikimate 1-carboxyvinyltransferase	NA	1287	0	0	0	1	1	0	0	1		GATTTTTTATAATTTCAAGAGTGTTTAAAGTATCTTGAGCTAAGAGATAAT
838446	'+'	1	1	2.17	2.17	5.39	1	Cj0896c	phenylalanyl-tRNA synthetase subunit beta	NA	2322	0	0	0	1	1	0	0	1		CTAACCAATCATTCAACCAACTTTTAGTAATTATCATCTAAACTGCTCCAA
838446	'+'	1	1	2.17	2.17	5.39	1	Cj0897c	phenylalanyl-tRNA synthetase subunit alpha	NA	993	0	0	0	1	1	0	0	1		CTAACCAATCATTCAACCAACTTTTAGTAATTATCATCTAAACTGCTCCAA
839449	'-'	1	1	411.36	3.89	6.99	2	Cj0897c	phenylalanyl-tRNA synthetase subunit alpha	28	993	1	0	0	0	1	0	0	1		AAGTTTGGTTTTTATGCTGAATTTAAAATAGTTTTTAATAGAATTAGAACT
839449	'-'	1	1	411.36	3.89	6.99	2	Cj0898	putative histidine triad %28HIT%29 family protein	NA	366	0	0	0	1	1	0	0	1		AAGTTTGGTTTTTATGCTGAATTTAAAATAGTTTTTAATAGAATTAGAACT
839505	'-'	1	1	91.66	5.59	10.38	2	Cj0897c	phenylalanyl-tRNA synthetase subunit alpha	84	993	0	1	0	0	1	0	0	1		TTTTTCTTGCATTATTTATCCTTTTTTATTGTTGGTTTGATACAATTATAT
839505	'-'	1	1	91.66	5.59	10.38	2	Cj0898	putative histidine triad %28HIT%29 family protein	NA	366	0	0	0	1	1	0	0	1		TTTTTCTTGCATTATTTATCCTTTTTTATTGTTGGTTTGATACAATTATAT
839518	'+'	1	0	26.98	45	1.33	2	Cj0898	putative histidine triad %28HIT%29 family protein	26	366	1	0	0	0	1	0	0	1		ACTATTTTAAATTCAGCATAAAAACCAAACTTTAAAGATATAATTGTATCA
839518	'+'	1	0	26.98	45	1.33	2	Cj0897c	phenylalanyl-tRNA synthetase subunit alpha	NA	993	0	0	0	1	1	0	0	1		ACTATTTTAAATTCAGCATAAAAACCAAACTTTAAAGATATAATTGTATCA
840667	'-'	1	0	5.88	4	1.45	3	Cj0899c	4-methyl-5%28beta-hydroxyethyl%29-thiazole monophosphate synthesis protein	159	570	1	0	0	0	1	0	0	1		AAATATCTTTGAATTTTCTCTAAAGATTTAAAAAAATGTGTTAGAATTTCC
840667	'-'	1	0	5.88	4	1.45	3	Cj0900c	hypothetical protein	NA	180	0	0	1	0	1	0	0	1		AAATATCTTTGAATTTTCTCTAAAGATTTAAAAAAATGTGTTAGAATTTCC
840667	'-'	1	0	5.88	4	1.45	3	Cj0901	putative amino acid ABC tansporter permease	NA	744	0	0	0	1	1	0	0	1		AAATATCTTTGAATTTTCTCTAAAGATTTAAAAAAATGTGTTAGAATTTCC
840730	'+'	1	1	9.91	1.82	6.19	2	Cj0901	putative amino acid ABC tansporter permease	33	744	1	0	0	0	1	0	0	1		CATTTTTTTAAATCTTTAGAGAAAATTCAAAGATATTTCTATAAAATCTTT
840730	'+'	1	1	9.91	1.82	6.19	2	Cj0900c	hypothetical protein	NA	180	0	0	0	1	1	0	0	1		CATTTTTTTAAATCTTTAGAGAAAATTCAAAGATATTTCTATAAAATCTTT
840813	'+'	1	1	436.12	14.88	9.63	1	Cj0901	putative amino acid ABC tansporter permease	NA	744	0	0	1	0	1	0	0	0		TTGAATCAGAAAAATATAAGAATTTTTGTTTTTTTTGTTATTATTATTTTA
841010	'-'	1	1	1.86	7	11.6	1	Cj0901	putative amino acid ABC tansporter permease	NA	744	0	0	0	1	1	0	0	1		CCGGTGTTCCTCGTATAATGTCTATATATTCATCTATAATAAAATTAAGTG
841592	'+'	1	1	14.78	9	2.47	1	Cj0902	putative glutamine transport ATP-binding protein	NA	729	0	0	1	0	1	0	0	0		AAGTTTTAAAAAATATTAACACTACAATCTCAAAAGGCGATGTAATAGCTA
843298	'+'	1	1	31.89	>100	19.16	1	Cj0903c	putative amino-acid transport protein	NA	1467	0	0	0	1	1	0	0	1		AAAAGCTCCAAAAAAATGTGAGCCTAAGGCTTTTTTTATATAATAAGCTGG
843745	'-'	1	1	2401.06	4.16	5.82	1	Cj0903c	putative amino-acid transport protein	24	1467	1	0	0	0	1	0	0	0		CAAATAAAATCATAAAGTCCTTTTTATAAAAATTATGTTAAAGTAAAATTT
844320	'-'	1	0	10.35	29	1.78	2	Cj0904c	putative RNA methylase	28	468	1	0	0	0	1	0	0	0		GGCTGATTTTTTTCATACTATTAACTATGAAATTTTAGTAAAATTAAATCC
844320	'-'	1	0	10.35	29	1.78	2	Cj0905c	alanine racemase	NA	987	0	0	1	0	1	0	0	0		GGCTGATTTTTTTCATACTATTAACTATGAAATTTTAGTAAAATTAAATCC
845369	'+'	1	1	41.02	63.75	10.12	1	Cj0905c	alanine racemase	NA	987	0	0	0	1	1	0	0	1		TCTATCTTAACGTATAAAATTTTATCGCCTCTAAACCGATAGTTTTTAGTG
845369	'+'	1	1	41.02	63.75	10.12	1	Cj0906c	putative periplasmic protein	NA	978	0	0	0	1	1	0	0	1		TCTATCTTAACGTATAAAATTTTATCGCCTCTAAACCGATAGTTTTTAGTG
845968	'-'	1	0	12.7	2.64	1.14	1	Cj0906c	putative periplasmic protein	NA	978	0	0	1	0	1	0	0	0		CTTACGAGGACGGAAAAATAAGAAAAGATTTTGAACAAAAAGAAATAATAA
846301	'-'	1	1	150.79	>100	6.63	1	Cj0906c	putative periplasmic protein	42	978	1	0	0	0	1	0	0	0		ATTGTTAATATAATTAATATTTTTTAAGAAAAAAAATATTATAATCACAAA
846378	'+'	1	0	15.52	>100	1.82	1	Cj0908	putative periplasmic protein	37	471	1	0	0	0	1	0	0	0		AAAAATATTAATTATATTAACAATGCAGCCTTATTTATGATATAATTTTTA
846940	'+'	1	1	445.91	2.3	6.68	1	Cj0909	putative periplasmic protein	31	420	1	0	0	0	1	0	0	0		TTTTCAAAATTTTATATTCAAATAAAAATATTTTTTGATATAATGAACAAA
847634	'-'	1	1	413.09	24.2	24.57	1	Cj0910	putative periplasmic protein	NA	453	0	0	0	1	1	0	0	1		ATACATATTTAATCCATAAATTTTAATTCCTAAGTTGTTATAATTTCCTAG
848023	'+'	1	1	13.32	5.78	5.75	1	Cj0911	putative periplasmic protein	NA	561	0	0	1	0	1	0	0	0		AAGATTTTAAAGGAGATAAGCTTATTATCTATTTTGGATATACTTATTGCC
848119	'-'	1	1	16.26	2.16	7.89	1	Cj0911	putative periplasmic protein	NA	561	0	0	0	1	1	0	0	1		GTAAAAGTATCGTAACCATTCGTTTGTATTGCTTAAGTTATTATCTCTATT
849758	'-'	1	1	31813.9	>100	9.73	1	Cj0913c	DNA-binding protein HU	26	297	1	0	0	0	1	0	0	0		AAAAGCTGTTTTTTACTTGATATTGTTTTTTAAATATGCTAAAATTAGGCG
849880	'-'	1	1	3.72	13	3.59	2	Cj0913c	DNA-binding protein HU	148	297	0	1	0	0	1	0	0	0		GTGTAAAGAATTTGTTAAATTTTATTATGATTTATACGAGAAAATTGGTAA
849880	'-'	1	1	3.72	13	3.59	2	Cj0914c	CiaB protein	NA	1833	0	0	1	0	1	0	0	0		GTGTAAAGAATTTGTTAAATTTTATTATGATTTATACGAGAAAATTGGTAA
851688	'-'	1	1	28.09	3.53	6.01	2	Cj0914c	CiaB protein	22	1833	1	0	0	0	1	0	0	1		ATATCTCTCATTTTTACTCCTTATTTTAAAAAATGAATTATAATTAAAAAA
851688	'-'	1	1	28.09	3.53	6.01	2	Cj0915	putative hydrolase	NA	414	0	0	0	1	1	0	0	1		ATATCTCTCATTTTTACTCCTTATTTTAAAAAATGAATTATAATTAAAAAA
851706	'+'	1	1	47.31	65	9.19	2	Cj0915	putative hydrolase	22	414	1	0	0	0	1	0	0	1		AAATTATTCATACTTTTATTCTCCTTTTTAACTTTTTTAATTATAATTCAT
851706	'+'	1	1	47.31	65	9.19	2	Cj0914c	CiaB protein	NA	1833	0	0	0	1	1	0	0	1		AAATTATTCATACTTTTATTCTCCTTTTTAACTTTTTTAATTATAATTCAT
852739	'-'	1	1	3.41	4	3.32	1	Cj0917c	putative integral membrane protein	NA	2112	0	0	1	0	1	0	0	0		TTGCTACAACTATACTTGTAAAAATGGGCAAGGCAAGATATACTTGGGTTA
853154	'-'	1	1	180.36	2.91	4.86	1	Cj0917c	putative integral membrane protein	NA	2112	0	0	1	0	1	0	0	0		GAAATTACTACTTTAACCACAAATATAGGAGAGTATACTATACTTTCAAGA
853159	'-'	1	1	17.74	6.33	3.44	1	Cj0917c	putative integral membrane protein	NA	2112	0	0	1	0	1	0	0	0		CTGAAGAAATTACTACTTTAACCACAAATATAGGAGAGTATACTATACTTT
854321	'-'	1	1	25.13	2.05	4.81	1	Cj0917c	putative integral membrane protein	NA	2112	0	0	1	0	1	0	0	0		GCGATTTATTTGGTGGTTGCTGCTGTATGTATTTATATGATAGGATATAGA
855599	'-'	1	1	2061.59	12.41	9.06	1	Cj0918c	ribose-phosphate pyrophosphokinase	33	930	1	0	0	0	1	0	0	0		TTTTTAAATTTACAGCAGTTTTTAACATTTTTTTTATTAAAATCTTTTGTA
855603	'-'	1	1	133.05	11.29	6.49	1	Cj0918c	ribose-phosphate pyrophosphokinase	37	930	0	1	0	0	1	0	0	0		AAGCTTTTTAAATTTACAGCAGTTTTTAACATTTTTTTTATTAAAATCTTT
855711	'+'	1	1	10.72	>100	16.45	1	Cj0919c	putative ABC-type amino-acid transporter permease	NA	660	0	0	0	1	1	0	0	1		AATATAAGCTTTTTTAAGAAATATAAGCTGTCTTTTTGGCATAATATCTTA
855731	'-'	1	1	86.85	2.72	4.05	2	Cj0918c	ribose-phosphate pyrophosphokinase	165	930	0	1	0	0	1	0	0	0		GAAATTTTAGCGATGATAGGTGTTGTTGCGGGAATTTATTTTATAATATGT
855731	'-'	1	1	86.85	2.72	4.05	2	Cj0919c	putative ABC-type amino-acid transporter permease	NA	660	0	0	1	0	1	0	0	0		GAAATTTTAGCGATGATAGGTGTTGTTGCGGGAATTTATTTTATAATATGT
856584	'+'	1	1	19.96	>100	8.29	1	Cj0920c	putative ABC-type amino-acid transporter permease	NA	753	0	0	0	1	1	0	0	1		TTTTTAATTAAATTTACCATTTGATTTGTCATCGGTGGTAAAATAATTCTA
856727	'-'	1	1	13.32	2.74	2.97	1	Cj0920c	putative ABC-type amino-acid transporter permease	NA	753	0	0	1	0	1	0	0	0		TGCCTGTTTTAGGTATAAGGCTTGATATATTTACTATTGGTGTATTGGGTG
858665	'-'	1	1	377.72	33.97	2.71	1	Cj0922c	amino-acid ABC transporter ATP-binding protein	38	729	1	0	0	0	1	0	0	0		ATAAGTTACATTTTGAAGTAGTTTTCTTTATTTAATGATAAAATAATTTCA
858671	'-'	1	1	6.65	19	4.97	1	Cj0922c	amino-acid ABC transporter ATP-binding protein	44	729	0	1	0	0	1	0	0	0		GTAAAAATAAGTTACATTTTGAAGTAGTTTTCTTTATTTAATGATAAAATA
860162	'-'	1	1	529.26	6.21	5.8	1	Cj0924c	putative MCP protein-glutamate methylesterase	41	555	1	0	0	0	1	0	0	0		TTGTTTTAAAAATAAGCTTTATTTTTCTTTATATATGTTAGAATCATGTGA
860248	'+'	1	1	11.46	7.8	4.97	1	Cj0925	ribose 5-phosphate isomerase	39	438	0	1	0	0	1	0	0	0		TTATTTTTAAAACAAAGAAAAGCTGTTTTTATGATTTAATATGATAAGATT
860252	'+'	1	1	2061.59	93.97	9.01	1	Cj0925	ribose 5-phosphate isomerase	35	438	1	0	0	0	1	0	0	0		TTTTAAAACAAAGAAAAGCTGTTTTTATGATTTAATATGATAAGATTAGGT
863452	'+'	1	1	9.98	10	2.8	2	Cj0930	GTP-dependent nucleic acid-binding protein EngD	209	1104	1	0	0	0	1	0	0	0		ACCCTCACTTAAGAGAACTTATAAAATCAAATATTGCCGATGTTAGTAATA
863452	'+'	1	1	9.98	10	2.8	2	Cj0929	leucyl aminopeptidase	NA	1452	0	0	1	0	1	0	0	0		ACCCTCACTTAAGAGAACTTATAAAATCAAATATTGCCGATGTTAGTAATA
872318	'-'	1	1	608.35	15.83	9.4	1	Cj0935c	putative sodium:amino-acid symporter family protein	35	1335	1	0	0	0	1	0	0	0		TTAAATTTGATTGTTTTCAATAAAGCTTAAAAGTTTTTTTGCTTTAATAAT
872432	'+'	1	1	1779.28	4.07	5.19	1	Cj0936	F0F1 ATP synthase subunit C	84	339	1	0	0	0	1	0	0	0		ATTTTTGTAAATTTCAATAAAAATAAAGATACTTTTGGTTATAATTCGAAT
872976	'-'	1	1	6.65	3.4	>100	1	Cjt01	tRNA-Leu	NA	86	0	0	0	1	1	0	0	1		TTTGATTTTGAATAGTTAGTATTTTAAGTTGAATGATTATAATTTTAAATA
875249	'+'	1	1	3.7	>100	13.61	1	Cj0938c	2-acyl-glycerophospho-ethanolamine acyltransferase	NA	3513	0	0	0	1	1	0	0	1		TTGAAGGAGTGAAGATGCTTTTGAGTATAAAACTAGGTATAATACTAACTG
876112	'-'	1	1	73.92	5.55	4.03	1	Cj0938c	2-acyl-glycerophospho-ethanolamine acyltransferase	NA	3513	0	0	1	0	1	0	0	0		TCTAAATGGTATATTAAAATTTTTCTTGATAAATTTGGTATTATTCCTGTA
876123	'-'	1	0	12.94	13.33	1.89	1	Cj0938c	2-acyl-glycerophospho-ethanolamine acyltransferase	NA	3513	0	0	1	0	1	0	0	0		GAAGTATTTATTCTAAATGGTATATTAAAATTTTTCTTGATAAATTTGGTA
877376	'+'	1	1	3.33	2.29	8.7	1	Cj0938c	2-acyl-glycerophospho-ethanolamine acyltransferase	NA	3513	0	0	0	1	1	0	0	1		AAGTGAGTATAACATTGAAAATTGCTGAAATTTTCATTACAATATTTTTTG
878057	'-'	1	1	22.18	2.02	4.36	2	Cj0939c	hypothetical protein	30	381	1	0	0	0	1	0	0	1		GTCCGCTGCGCCATCTTGCTTGGTAACAATTTTATAAGTATAATTTACAAA
878057	'-'	1	1	22.18	2.02	4.36	2	CjNC19	CjNC19	NA	58	0	0	0	1	1	0	0	1		GTCCGCTGCGCCATCTTGCTTGGTAACAATTTTATAAGTATAATTTACAAA
878171	'-'	1	1	9865.13	>100	11.8	2	Cjt02	tRNA-Asp	0	77	1	0	0	0	1	0	0	1		TTTATAAAATCATAAATAGGTTTTATAATCTCTACTTCTTTACTTTGGATG
878171	'-'	1	1	9865.13	>100	11.8	2	CjNC19	CjNC19	NA	58	0	0	0	1	1	0	0	1		TTTATAAAATCATAAATAGGTTTTATAATCTCTACTTCTTTACTTTGGATG
878291	'-'	1	1	102.97	2.13	7.89	2	Cjt02	tRNA-Asp	120	77	0	1	0	0	1	0	0	0		TGTGGAAACAGAGGTTCAAATCCTCTAGGGGTCGCCAATCATAGGTCGCTT
878291	'-'	1	1	102.97	2.13	7.89	2	Cjp19	tRNA-Val	NA	76	0	0	1	0	1	0	0	0		TGTGGAAACAGAGGTTCAAATCCTCTAGGGGTCGCCAATCATAGGTCGCTT
878556	'-'	1	1	10220	>100	11.89	2	Cjt2	tRNA-Asp	0	77	1	0	0	0	1	0	0	1		TTTATAAAATCATAAATAGGTTTTATAATCTTTACTTCTTTACTTTGGATG
878556	'-'	1	1	10220	>100	11.89	2	CjNC19_2	CjNC19_2	NA	46	0	0	0	1	1	0	0	1		TTTATAAAATCATAAATAGGTTTTATAATCTTTACTTCTTTACTTTGGATG
878676	'-'	1	1	102.97	2.62	7.37	2	Cjt2	tRNA-Asp	120	77	0	1	0	0	1	0	0	0		AGGGGGCCGTTGGTTCGAATCCAACACGGGACACCATTATAAAGGTCGCTT
878676	'-'	1	1	102.97	2.62	7.37	2	Cjt03	tRNA-Val	NA	76	0	0	1	0	1	0	0	0		AGGGGGCCGTTGGTTCGAATCCAACACGGGACACCATTATAAAGGTCGCTT
878683	'-'	1	1	21.37	3.06	7.55	1	Cjt03	tRNA-Val	0	76	1	0	0	0	1	0	0	0		TTTAAGGAGGGGGCCGTTGGTTCGAATCCAACACGGGACACCATTATAAAG
878784	'-'	1	1	149.69	3.11	5.8	1	Cjt04	tRNA-Lys	18	76	1	0	0	0	1	0	0	0		AAAATGATTTAAAAAAGCTTGACAAATAGAGCTAATTTTGGCATAATCACA
879054	'+'	1	1	9.91	>100	3.52	1	Cj0940c	putative glutamine transport system permease	NA	786	0	0	0	1	1	0	0	1		CTTTAATTAAATTTGCAAATTGTCCACTCAGCGGTGCTAAAATATTTTTTA
879206	'+'	1	1	12.57	18	13.26	1	Cj0940c	putative glutamine transport system permease	NA	786	0	0	0	1	1	0	0	1		CTAAATATTTCAGCTAAGTAAGCAGCAGAAAAACATGATAAAATAATAACT
879247	'-'	1	1	13.31	10	7.56	1	Cj0940c	putative glutamine transport system permease	NA	786	0	0	1	0	1	0	0	0		TTGTCAGAGGAACCCCTTTACTAGTGCAGGTATTATTGATATATTATATCA
879369	'-'	1	0	2.59	8	0.84	1	Cj0940c	putative glutamine transport system permease	NA	786	0	0	1	0	1	0	0	0		AAATACTTTAATAATCAGTTTTTTTTCTTTATTGTTGAGTATAATTTTGGG
879477	'-'	1	1	5.17	3.33	3.24	1	Cj0940c	putative glutamine transport system permease	NA	786	0	0	1	0	1	0	0	0		GATTTTATTTTTAATATTGTTTTGTTATTGTAGTTTTAGTATAAGTGCTTA
880404	'-'	1	1	9.98	28	2.65	1	Cj0941c	putative permease	NA	1206	0	0	1	0	1	0	0	0		GCTAAAGCTTTAAAGGATGAGAATTTAAGTGGTTTTGATATACTTGTAGGA
880909	'-'	1	1	20.7	3	3.06	2	Cj0941c	putative permease	68	1206	1	0	0	0	1	0	0	0		ATAATCTTGGCGAAGCTGAATTTAAAAAAGTTCCACGCAATGCTCCTTGTC
880909	'-'	1	1	20.7	3	3.06	2	Cj0942c	preprotein translocase subunit SecA	NA	2589	0	0	1	0	1	0	0	0		ATAATCTTGGCGAAGCTGAATTTAAAAAAGTTCCACGCAATGCTCCTTGTC
881110	'-'	1	0	3.72	3.5	1.66	2	Cj0941c	putative permease	269	1206	0	1	0	0	1	0	0	0		ATCAAAAAGATCCTCTTGTGGAATATAAGAAAGAAAGTTATAATCTTTTCT
881110	'-'	1	0	3.72	3.5	1.66	2	Cj0942c	preprotein translocase subunit SecA	NA	2589	0	0	1	0	1	0	0	0		ATCAAAAAGATCCTCTTGTGGAATATAAGAAAGAAAGTTATAATCTTTTCT
881995	'-'	1	1	6.81	2.29	2.81	1	Cj0942c	preprotein translocase subunit SecA	NA	2589	0	0	1	0	1	0	0	0		ATATGCTTGTAAAAGAGAAAATCCCTCATCATGTTTTAAATGCTAAAAATC
882520	'-'	1	1	24.76	17.75	4.07	1	Cj0942c	preprotein translocase subunit SecA	NA	2589	0	0	1	0	1	0	0	0		TTTTTGGCGTAGAAAATTTATACAGTCTTGATAATGCTATCTTAGCTCATC
883451	'-'	1	1	1266.97	>100	8.15	2	Cj0942c	preprotein translocase subunit SecA	25	2589	1	0	0	0	1	0	0	1		TTTTATGTCATTCTAGCTAATTTTAATTAAATAATCGTTATAATGATAGCT
883451	'-'	1	1	1266.97	>100	8.15	2	Cj0943	outer-membrane lipoprotein carrier protein	NA	510	0	0	0	1	1	0	0	1		TTTTATGTCATTCTAGCTAATTTTAATTAAATAATCGTTATAATGATAGCT
883867	'-'	1	1	77.25	27.12	8.49	1	Cj0943	outer-membrane lipoprotein carrier protein	NA	510	0	0	0	1	1	0	0	1		TAGGATATGCTTTGAATTTGCTCTTGATTGAGTTTAATTGTATAATTTATA
883875	'+'	1	0	18.85	6.1	1.3	1	Cj0943	outer-membrane lipoprotein carrier protein	NA	510	0	0	1	0	1	0	0	0		AAGTCTTATAGACAAAGATAAACTTGTAGCAAAATATGATAATATAAATTA
884000	'+'	1	1	8.05	4.71	3.42	2	Cj0943	outer-membrane lipoprotein carrier protein	NA	510	0	0	1	0	1	0	0	1		ATCTAAACAATCAAATTAAAAATCCAAAAATTAATTCCGATGTTTTTAAGG
884000	'+'	1	1	8.05	4.71	3.42	2	Cj0944c	putative periplasmic protein	NA	735	0	0	0	1	1	0	0	1		ATCTAAACAATCAAATTAAAAATCCAAAAATTAATTCCGATGTTTTTAAGG
884034	'+'	1	1	44.28	6.62	5.21	2	Cj0943	outer-membrane lipoprotein carrier protein	NA	510	0	0	1	0	1	0	0	1		TTCCGATGTTTTTAAGGCAAAAATTCCGCAAAATTATGATATAGTTCGCTA
884034	'+'	1	1	44.28	6.62	5.21	2	Cj0944c	putative periplasmic protein	NA	735	0	0	0	1	1	0	0	1		TTCCGATGTTTTTAAGGCAAAAATTCCGCAAAATTATGATATAGTTCGCTA
884059	'-'	1	0	5.17	>100	0.98	2	Cj0944c	putative periplasmic protein	NA	735	0	0	1	0	1	0	0	1		AATAACGCAAGCAAGCCTTATCATTTGCCACAAACAGGCTATGATATAAAG
884059	'-'	1	0	5.17	>100	0.98	2	Cj0943	outer-membrane lipoprotein carrier protein	NA	510	0	0	0	1	1	0	0	1		AATAACGCAAGCAAGCCTTATCATTTGCCACAAACAGGCTATGATATAAAG
886130	'-'	1	1	11.83	2.88	3.73	2	Cj0945c	putative helicase	11	1344	0	1	0	0	1	0	0	1		AACAAGATTTCATAATCAACCTTTTAGAAAAAATAGTTATAATTAAAGCCA
886130	'-'	1	1	11.83	2.88	3.73	2	Cj0946	putative lipoprotein	NA	1347	0	0	0	1	1	0	0	1		AACAAGATTTCATAATCAACCTTTTAGAAAAAATAGTTATAATTAAAGCCA
886146	'+'	1	1	2.22	4	11.6	2	Cj0946	putative lipoprotein	22	1347	1	0	0	0	1	0	0	1		AATTTTTTCTAGTTTATCAAACATTATATTTCCTTGGCTTTAATTATAACT
886146	'+'	1	1	2.22	4	11.6	2	Cj0945c	putative helicase	NA	1344	0	0	0	1	1	0	0	1		AATTTTTTCTAGTTTATCAAACATTATATTTCCTTGGCTTTAATTATAACT
886476	'-'	1	1	4.07	>100	>100	1	Cj0946	putative lipoprotein	NA	1347	0	0	0	1	1	0	0	1		TTTGCGTTATTTATAGCGTTTTTAAACCATGAAAGTGGAATAATTTGTTTA
887078	'+'	1	1	9.6	22	5.48	1	Cj0946	putative lipoprotein	NA	1347	0	0	1	0	1	0	0	0		ACTTTCACAAGTTTTAAATTTGCCTTATGGCTGGGGCGGTTATAATTTTGA
887461	'+'	1	1	25.39	2.39	8.66	2	Cj0946	putative lipoprotein	NA	1347	0	0	1	0	1	0	0	1		ATAATTTGCTTTTATCAAGACTTAAAGAAATAAGTTTTATAAATTTAAACG
887461	'+'	1	1	25.39	2.39	8.66	2	Cj0947c	putative carbon-nitrogen hydrolase	NA	873	0	0	0	1	1	0	0	1		ATAATTTGCTTTTATCAAGACTTAAAGAAATAAGTTTTATAAATTTAAACG
888531	'-'	1	0	1.86	6	1.28	2	Cj0947c	putative carbon-nitrogen hydrolase	133	873	0	1	0	0	1	0	0	0		AACTCCAAGTTGTAATTATTTAAGCGTGCATTTGGTTTTTTGCCCTATAAT
888531	'-'	1	0	1.86	6	1.28	2	Cj0948c	putative cation efflux family protein	NA	888	0	0	1	0	1	0	0	0		AACTCCAAGTTGTAATTATTTAAGCGTGCATTTGGTTTTTTGCCCTATAAT
888636	'-'	1	0	3.33	2	1.7	2	Cj0947c	putative carbon-nitrogen hydrolase	238	873	0	1	0	0	1	0	0	0		TTTTTTAATGGATGAGGCTTTACCTAAGGAACAAGTGGATAAAATTTGTAC
888636	'-'	1	0	3.33	2	1.7	2	Cj0948c	putative cation efflux family protein	NA	888	0	0	1	0	1	0	0	0		TTTTTTAATGGATGAGGCTTTACCTAAGGAACAAGTGGATAAAATTTGTAC
890284	'-'	1	1	78.72	2.63	7.83	1	Cj0949c	putative peptidyl-arginine deiminase family protein	28	978	1	0	0	0	1	0	0	0		TCGAGGCAATCTTCTTAAATTTGACAAAAGTCTAAAAAATGATACAATTAT
890826	'-'	1	1	30.35	7.12	2.82	2	Cj0950c	putative lipoprotein	37	435	1	0	0	0	1	0	0	0		ATTCTGCTTCAAGTTGCAGATGAGTTAAAAATAGTGTGTCATAATCTTGAA
890826	'-'	1	1	30.35	7.12	2.82	2	Cj0951c	putative MCP-domain signal transduction protein	NA	675	0	0	1	0	1	0	0	0		ATTCTGCTTCAAGTTGCAGATGAGTTAAAAATAGTGTGTCATAATCTTGAA
891842	'-'	1	1	36.22	17.33	3.19	1	Cj0952c	putative HAMP containing membrane protein	NA	720	0	0	1	0	1	0	0	0		TTCAAAAAGATATAAGCAAAACCAGTCAATCTTATATTGTAATATTTACTA
892406	'-'	1	0	9.29	6	1.53	1	Cj0952c	putative HAMP containing membrane protein	24	720	1	0	0	0	1	0	0	0		TTTACACATAATTCAATAAAAATTAAATAAATTATGTGTAAAATATTTCCG
893960	'-'	1	1	7.43	3.67	2.52	1	Cj0953c	bifunctional phosphoribosylaminoimidazolecarboxamide formyltransferase%2FIMP cyclohydrolase	NA	1533	0	0	1	0	1	0	0	0		ATGAGAGCATTACTTAGTGTGAGTGATAAAGAAGGCATAGTAGAATTTGGC
894112	'+'	1	1	30.68	4.32	7.59	1	Cj0954c	putative DnaJ-like protein	NA	771	0	0	0	1	1	0	0	1		TGAAATTTCTCTACGCCGATTTTAAGCTCTTCTTCGCTAACATTGTTTGCA
894438	'-'	1	1	5.26	>100	2.76	1	Cj0954c	putative DnaJ-like protein	NA	771	0	0	1	0	1	0	0	0		TAAAAGCAAGTTTTAACGAACATAAAGAAAATTTAAGCGATGCTTTTTATG
894615	'+'	1	1	5.54	18	3.32	1	Cj0954c	putative DnaJ-like protein	NA	771	0	0	0	1	1	0	0	1		CCTGCCATCGCTTTTTGCAATTTTTGCCAAAAGTGCGATAACATAGTAATT
894951	'-'	1	1	7.02	3.11	3.53	2	Cj0954c	putative DnaJ-like protein	168	771	1	0	0	0	1	0	0	0		GATGAAAAAATGATTTTTGATGAGAGTGCAAGTCGTGCTATAATAGGGCTT
894951	'-'	1	1	7.02	3.11	3.53	2	Cj0955c	phosphoribosylformylglycinamidine synthase II	NA	2187	0	0	1	0	1	0	0	0		GATGAAAAAATGATTTTTGATGAGAGTGCAAGTCGTGCTATAATAGGGCTT
897893	'+'	1	1	11.83	3.46	5.71	1	Cj0956c	tRNA modification GTPase TrmE	NA	1329	0	0	0	1	1	0	0	1		CTAAAAGTTCTCCTAAGTTTCCTTGCATGTTGCGTGCTATAATTTTAGCTG
901529	'-'	1	1	772.08	2.15	8.13	2	Cj0961c	50S ribosomal protein L34	31	135	1	0	0	0	1	0	0	1		TTACTCTTAATCAAAAGCAATTTATAAGTAAGATTAAGATAAAATACAAGT
901529	'-'	1	1	772.08	2.15	8.13	2	Cj0962	putative acetyltransferase	NA	480	0	0	0	1	1	0	0	1		TTACTCTTAATCAAAAGCAATTTATAAGTAAGATTAAGATAAAATACAAGT
901608	'+'	1	1	287.91	46.82	7.46	1	Cj0962	putative acetyltransferase	21	480	1	0	0	0	1	0	0	0		AATTGCTTTTGATTAAGAGTAATTTTTAAATTCTTTTGATAAATTTTGAAA
902482	'+'	1	1	114.94	14	6.59	2	Cj0964	putative periplasmic protein	228	1191	1	0	0	0	1	0	0	0		AAATGTTTTTGTAATGGAAAATTTGATGATTTTTCGCTACAATCTTGCTTA
902482	'+'	1	1	114.94	14	6.59	2	Cj0963	hypothetical protein	NA	609	0	0	1	0	1	0	0	0		AAATGTTTTTGTAATGGAAAATTTGATGATTTTTCGCTACAATCTTGCTTA
903044	'-'	1	1	16.26	1.81	13.5	1	Cj0964	putative periplasmic protein	NA	1191	0	0	0	1	1	0	0	1		TTACTTTGATTTCAGCTCTTTGTCTTAAAAGATAGGCTATGCTTGAATTTA
903048	'-'	1	1	12.94	>100	21.55	1	Cj0964	putative periplasmic protein	NA	1191	0	0	0	1	1	0	0	1		ACTTTTACTTTGATTTCAGCTCTTTGTCTTAAAAGATAGGCTATGCTTGAA
903681	'-'	1	1	2.96	>100	2.21	1	Cj0964	putative periplasmic protein	NA	1191	0	0	0	1	1	0	0	1		TCTATACTTTGATTAAAAATTTCATTAAGATAGACTAGGTTATCATCGTGG
904302	'-'	1	1	1255.14	63.89	14.44	1	Cj0965c	putative acyl-CoA thioester hydrolase	36	375	1	0	0	0	1	0	0	0		TAATATAAACTAAAAAGCGATATCAAAGAATTTCCGTTGTATAATCTAATG
904604	'-'	1	1	145.99	2.21	12.6	1	Cj0967	putative periplasmic protein	NA	2289	0	0	0	1	1	0	0	1		ATTTGGTTTAGGATTGTTATATATTAAAGTAATATTGTTAATATATTGTTT
904640	'+'	1	1	31.42	>100	11.88	1	Cj0967	putative periplasmic protein	NA	2289	0	0	1	0	1	0	0	0		ATGCTAAGAGTTCTAAACAATATATTAACAATATTACTTTAATATATAACA
905221	'-'	1	1	3.7	>100	>100	1	Cj0967	putative periplasmic protein	NA	2289	0	0	0	1	1	0	0	1		TCTTTGATAAAGATTTTATTGTTTTTTACATTACCTTGATAAGCTAAACCA
905805	'-'	1	1	2.22	>100	3.87	1	Cj0967	putative periplasmic protein	NA	2289	0	0	0	1	1	0	0	1		CTTTATTATAATCCGCACTGCCTTCTAAGGTTCTAGCAGCTACAATATTTA
906034	'-'	1	1	4.44	>100	9.95	1	Cj0967	putative periplasmic protein	NA	2289	0	0	0	1	1	0	0	1		TCTATATTACTTACATCGGTAATGCTTTGAACATTGTTATAATTTATAGTA
906078	'+'	1	1	15.52	>100	8.32	1	Cj0967	putative periplasmic protein	NA	2289	0	0	1	0	1	0	0	0		TTATAATACTATAAATTATAACAATGTTCAAAGCATTACCGATGTAAGTAA
906973	'+'	1	1	5.17	>100	9.95	2	Cj0969	pseudo	144	280	1	0	0	0	1	0	0	1		CAAGAATATCTCAAGATGACAAAAACATTTATGCAAGGATAAAATAAATCA
906973	'+'	1	1	5.17	>100	9.95	2	Intergenic_906748_907066	Intergenic_906748_907066	NA	319	0	0	0	1	1	0	0	1		CAAGAATATCTCAAGATGACAAAAACATTTATGCAAGGATAAAATAAATCA
908516	'-'	1	1	5.91	2.4	6.43	1	Cj0972	hypothetical protein	NA	324	0	0	0	1	1	0	0	1		AAAGCTGTAGCAATGCCAGGTTCTTGTTGTCCTATGGTATCATTTGGGTTA
908516	'-'	1	1	5.91	2.4	6.43	1	Cj0973	hypothetical protein	NA	111	0	0	0	1	1	0	0	1		AAAGCTGTAGCAATGCCAGGTTCTTGTTGTCCTATGGTATCATTTGGGTTA
910418	'+'	1	1	4.07	2.83	19.29	2	Cj0976	putative methyltransferase	293	891	0	1	0	0	1	0	0	0		TGGCTACTCCTTTAAAAGATTTTTATATCACTCCTTTTTATAATATAGGTT
910418	'+'	1	1	4.07	2.83	19.29	2	Cj0975	putative outer-membrane protein	NA	1725	0	0	1	0	1	0	0	0		TGGCTACTCCTTTAAAAGATTTTTATATCACTCCTTTTTATAATATAGGTT
910700	'+'	1	1	764.5	>100	7.86	1	Cj0976	putative methyltransferase	11	891	1	0	0	0	1	0	0	0		TGCATATGAGATTTATATTGCCATAAAAGCTTTTAATGTTATAATTTAGCA
911559	'+'	1	1	7.12	8.5	3.68	2	Cj0977	hypothetical protein	115	579	0	1	0	0	1	0	0	0		TCGCTGGAAAATTTCTTAGATCCAAAGGATAAAAATCTTACCATTGAAGGC
911559	'+'	1	1	7.12	8.5	3.68	2	Cj0976	putative methyltransferase	NA	891	0	0	1	0	1	0	0	0		TCGCTGGAAAATTTCTTAGATCCAAAGGATAAAAATCTTACCATTGAAGGC
911633	'+'	1	1	325.98	3.8	6.41	1	Cj0977	hypothetical protein	41	579	1	0	0	0	1	0	0	0		TATACGCATTAAAATATAAATTCTTTTTATTTTTTGCCGATATTGAATTTT
912620	'-'	1	1	228.96	3.08	8.82	2	Cj0978c	putative lipoprotein	194	174	1	0	0	0	1	0	0	0		AAGTTGAAATTATTTATAAAAATAAAGATACTTATGGTAGAATTGTTGCTA
912620	'-'	1	1	228.96	3.08	8.82	2	Cj0979c	putative secreted nuclease	NA	528	0	0	1	0	1	0	0	0		AAGTTGAAATTATTTATAAAAATAAAGATACTTATGGTAGAATTGTTGCTA
912998	'-'	1	1	8.13	23	13.05	2	Cj0979c	putative secreted nuclease	36	528	1	0	0	0	1	0	0	1		TTTCTATAACATTTTGCATTTTATCTCCTTTGTTTTGATAAAATTATGGCA
912998	'-'	1	1	8.13	23	13.05	2	Cj0980	putative peptidase	NA	1269	0	0	0	1	1	0	0	1		TTTCTATAACATTTTGCATTTTATCTCCTTTGTTTTGATAAAATTATGGCA
913013	'+'	1	0	22.18	71	1.47	2	Cj0980	putative peptidase	17	1269	1	0	0	0	1	0	0	1		TTTTTAATCATTTTGCCTTTAAATTTTAAAAAATATGCCATAATTTTATCA
913013	'+'	1	0	22.18	71	1.47	2	Cj0979c	putative secreted nuclease	NA	528	0	0	0	1	1	0	0	1		TTTTTAATCATTTTGCCTTTAAATTTTAAAAAATATGCCATAATTTTATCA
916464	'-'	1	1	18.11	2.31	7.66	1	Cj0982c	putative amino-acid transporter periplasmic solute-binding protein	57	840	1	0	0	0	1	0	0	0		TTTAGTTTGTTTCAAATGCATTATTTATAATTTTAAGTATAATTAACTTTG
916468	'-'	1	1	8.5	7.5	10.97	1	Cj0982c	putative amino-acid transporter periplasmic solute-binding protein	61	840	0	1	0	0	1	0	0	0		TCTTTTTAGTTTGTTTCAAATGCATTATTTATAATTTTAAGTATAATTAAC
916602	'+'	1	1	39.92	2.3	8.03	1	Cj0983	putative lipoprotein	24	1119	1	0	0	0	1	0	0	0		ACTCTCTTTTAGCATTGTTTAAATTTTAAGTAAAAAAAGATATAATCTTTT
917189	'-'	1	1	66.16	>100	11.83	1	Cj0983	putative lipoprotein	NA	1119	0	0	0	1	1	0	0	1		TTTATATTTAGATTTGTATTGAAATTTAATTTTGCGTTATAAAATTTTATA
917685	'-'	1	1	90.55	6.98	4.94	1	Cj0983	putative lipoprotein	NA	1119	0	0	0	1	1	0	0	1		CGCTCCGCCCATTAACATAGAAAACATGATAAATGGAAGTATAATTTTTAA
917811	'-'	1	1	20.33	8.86	6.8	1	Cj0983	putative lipoprotein	NA	1119	0	0	0	1	1	0	0	1		TCGCTAGGGGAGAATAAAATTTTCATTTTAGCCTTTTTTGTTAATATTATG
917811	'-'	1	1	20.33	8.86	6.8	1	Cj0984	hypothetical protein	NA	741	0	0	0	1	1	0	0	1		TCGCTAGGGGAGAATAAAATTTTCATTTTAGCCTTTTTTGTTAATATTATG
917843	'+'	1	1	3.7	11	12.48	1	Cj0984	hypothetical protein	NA	741	0	0	1	0	1	0	0	0		CTTTGCTCTTAATGTTTTCATAATATTAACAAAAAAGGCTAAAATGAAAAT
918106	'-'	1	1	111.99	6.72	7.56	1	Cj0984	hypothetical protein	NA	741	0	0	0	1	1	0	0	1		TTCTAAAATATAAGCTTGACTTTTTTTATCTAAAGCTTTAAAATTAAGATA
918628	'-'	1	1	3.7	11	7.46	2	Cj0985c	hippurate hydrolase	NA	1152	0	0	1	0	1	0	0	1		GACATTTATTTACATAATTCTAGTTATGTTTTTAATGATAAGCTTTTAGCT
918628	'-'	1	1	3.7	11	7.46	2	Cj0984	hypothetical protein	NA	741	0	0	0	1	1	0	0	1		GACATTTATTTACATAATTCTAGTTATGTTTTTAATGATAAGCTTTTAGCT
919874	'-'	1	1	245.41	3.77	11.52	2	Cj0985c	hippurate hydrolase	143	1152	1	0	0	0	1	0	0	0		ATTATGAGTGCTTTTTGGAGTATTACCTTTGTTATACTATCATTTAATCTA
919874	'-'	1	1	245.41	3.77	11.52	2	Cj0986c	putative integral membrane protein	NA	189	0	0	1	0	1	0	0	0		ATTATGAGTGCTTTTTGGAGTATTACCTTTGTTATACTATCATTTAATCTA
919879	'-'	1	1	19.96	3.45	20.72	2	Cj0985c	hippurate hydrolase	148	1152	0	1	0	0	1	0	0	0		CTTATATTATGAGTGCTTTTTGGAGTATTACCTTTGTTATACTATCATTTA
919879	'-'	1	1	19.96	3.45	20.72	2	Cj0986c	putative integral membrane protein	NA	189	0	0	1	0	1	0	0	0		CTTATATTATGAGTGCTTTTTGGAGTATTACCTTTGTTATACTATCATTTA
920979	'-'	1	1	42.13	14	5.15	2	Cj0987c	putative MFS transport protein	26	966	1	0	0	0	1	0	0	0		AAAAAAATAATTAAAGATAATAAATATCTTATTTTTTTATGTTATATTTTA
920979	'-'	1	1	42.13	14	5.15	2	Cj0988c	hypothetical protein	NA	237	0	0	1	0	1	0	0	0		AAAAAAATAATTAAAGATAATAAATATCTTATTTTTTTATGTTATATTTTA
921114	'+'	1	1	6.65	>100	3.32	2	Cj0989	hypothetical protein	74	207	0	1	0	0	1	0	0	1		CTTTTTGAAAATTTATATATAAGTTTAAAGATAAAAAAACTAAAATACAAA
921114	'+'	1	1	6.65	>100	3.32	2	Cj0988c	hypothetical protein	NA	237	0	0	0	1	1	0	0	1		CTTTTTGAAAATTTATATATAAGTTTAAAGATAAAAAAACTAAAATACAAA
921165	'+'	1	1	35.48	4.84	4.88	2	Cj0989	hypothetical protein	23	207	1	0	0	0	1	0	0	1		ATAAAAAACCCGTAAAAGTTTTTTGAAGTATTTAAATGATATATTTCAAAA
921165	'+'	1	1	35.48	4.84	4.88	2	Cj0988c	hypothetical protein	NA	237	0	0	0	1	1	0	0	1		ATAAAAAACCCGTAAAAGTTTTTTGAAGTATTTAAATGATATATTTCAAAA
921399	'+'	1	1	21.44	12.6	2.9	1	Cj0990c	hypothetical protein	NA	762	0	0	0	1	1	0	0	1		TTTAATTGAAAAAAATCGCTCTAATATAGAAAATATAATAAAATAAAACTA
922493	'+'	1	1	15.52	3.8	16.17	1	Cj0991c	putative oxidoreductase ferredoxin-type electron transport protein	NA	1266	0	0	0	1	1	0	0	1		TTGCATTTTTCTTGCATGGCAAGGATCGTGATAAGTAATGCTATAATTAAA
923796	'+'	1	1	11.83	>100	15.75	1	Cj0992c	coproporphyrinogen III oxidase	NA	1356	0	0	0	1	1	0	0	1		TGCAGCTTCATAACTTGACATATCTTTAAAATTTTGTGCATAATGTCTTTG
927184	'+'	1	1	365.9	60.67	3.48	2	Cj0996	GTP cyclohydrolase II	26	561	1	0	0	0	1	0	0	1		TTCTAAATCTTTTAAACATTTTTTTGTCCTTTTTTTGCTAAAATCTTAACA
927184	'+'	1	1	365.9	60.67	3.48	2	Cj0995c	delta-aminolevulinic acid dehydratase	NA	984	0	0	0	1	1	0	0	1		TTCTAAATCTTTTAAACATTTTTTTGTCCTTTTTTTGCTAAAATCTTAACA
928669	'+'	1	1	2.59	>100	7.94	1	Cj0998c	putative periplasmic protein	NA	573	0	0	0	1	1	0	0	1		CCGTATCTCCCAATAAAGCAGGGAAAAATACTTTTGTGATATTATTGGTTA
928680	'+'	1	1	18.27	8.37	10.1	1	Cj0998c	putative periplasmic protein	NA	573	0	0	0	1	1	0	0	1		AATAAAGCAGGGAAAAATACTTTTGTGATATTATTGGTTATAATATCATTG
928956	'-'	1	1	530	2.33	3.32	1	Cj0998c	putative periplasmic protein	31	573	1	0	0	0	1	0	0	0		TTATTTTAGAAAATTTTATTTTATTAATCAACTAAGAATATAATTTAATTC
929783	'-'	1	1	6.28	2.89	8.7	1	Cj0999c	putative integral membrane protein	NA	1098	0	0	1	0	1	0	0	0		TGAGCTTTTAAGTGTAGGATTGAAAGGATTTTTGCTTTCTGCTATAGTGAT
931132	'+'	1	0	17.34	9	1.51	1	Cj1001	RNA polymerase sigma factor RpoD	59	1869	1	0	0	0	1	0	0	0		GAAAAATTTGAAAAAATATTCAAATCATAAACATAATAACCGATTTATATA
933351	'+'	1	1	41.02	14.87	10.39	1	Cj1002c	putative phosphoglycerate%2Fbisphosphoglycerate mutase	NA	513	0	0	0	1	1	0	0	1		TCTTGCAGAATTTTTAGCAAATTTTCAACATTGCAAAGATACAATCTTTCA
936229	'+'	1	1	7.12	4.83	8.01	1	Cj1005c	putative membrane bound ATPase	NA	1617	0	0	0	1	1	0	0	1		ATAAAATTCCCAAAAGCATACATAAAACCATAAAAGATGCTAAAATTATCT
936229	'+'	1	1	7.12	4.83	8.01	1	Cj1006c	putative MiaB-like tRNA modifying enzyme	NA	1251	0	0	0	1	1	0	0	1		ATAAAATTCCCAAAAGCATACATAAAACCATAAAAGATGCTAAAATTATCT
937112	'+'	1	1	22.55	>100	8.65	1	Cj1006c	putative MiaB-like tRNA modifying enzyme	NA	1251	0	0	0	1	1	0	0	1		AAAATCACAACCTTCTTGAATTTTCACAAAAGCTTTGGTATGATTTTCATA
938002	'+'	1	1	2.59	>100	9.95	1	Cj1007c	putative mechanosensitive ion channel family protein	NA	1572	0	0	0	1	1	0	0	1		ATAGTTATTAGGAATAAATATAATACGCCCACTACGACGATTTTTATTATA
939210	'-'	1	0	22.55	4.39	0.84	2	Cj1007c	putative mechanosensitive ion channel family protein	146	1572	1	0	0	0	1	0	0	0		AAGATATTTTACTTAAATTCGGTTTGCCAATATCATATAAAATCAACAATG
939210	'-'	1	0	22.55	4.39	0.84	2	Cj1008c	3-dehydroquinate synthase	NA	1056	0	0	1	0	1	0	0	0		AAGATATTTTACTTAAATTCGGTTTGCCAATATCATATAAAATCAACAATG
939574	'+'	1	1	30.97	17.67	5.67	1	Cj1008c	3-dehydroquinate synthase	NA	1056	0	0	0	1	1	0	0	1		AAGAAACTTTTTTCATCAATTTTTTCTATAAAATCAAGTATACTATAATCA
940384	'+'	1	1	3.51	>100	3.76	1	Cj1009c	hypothetical protein	NA	1401	0	0	0	1	1	0	0	1		TTATTAATAATTTGTATATTTTTATCATAAAGCTTAGATAAACTTCTAAAA
941540	'+'	1	1	238.39	14.16	7.8	2	Cj1010	queuine tRNA-ribosyltransferase	52	1122	1	0	0	0	1	0	0	1		CTTTTTCAAAACAAAGCCTTTCTAAGAAATGCTTTGCTAAAATACCATCTA
941540	'+'	1	1	238.39	14.16	7.8	2	Cj1009c	hypothetical protein	NA	1401	0	0	0	1	1	0	0	1		CTTTTTCAAAACAAAGCCTTTCTAAGAAATGCTTTGCTAAAATACCATCTA
941582	'-'	1	1	189.23	7.83	6.43	2	Cj1009c	hypothetical protein	20	1401	1	0	0	0	1	0	0	1		ACCCTTGCCATTCCATCTTTATGCTTTAATTTAAATTCCATTTGTTATAAT
941582	'-'	1	1	189.23	7.83	6.43	2	Cj1010	queuine tRNA-ribosyltransferase	NA	1122	0	0	0	1	1	0	0	1		ACCCTTGCCATTCCATCTTTATGCTTTAATTTAAATTCCATTTGTTATAAT
942016	'+'	1	0	7.02	4.2	1.18	1	Cj1010	queuine tRNA-ribosyltransferase	NA	1122	0	0	1	0	1	0	0	0		AAAAAGTGTTTTAGATACTCAATATGATTTTAATTCTGATATTATGATGAT
942312	'-'	1	1	30.68	14.83	8.29	1	Cj1010	queuine tRNA-ribosyltransferase	NA	1122	0	0	0	1	1	0	0	1		ATCTTCAGGCGTTCCTACGCCCATTAAATATCTTGGACGATTTTCATCTAG
943527	'+'	1	1	33.63	7.72	7.62	2	Cjp21	tRNA-Arg	8	77	0	1	0	0	1	0	0	1		AAATAAGCAAAATTTTGCTTATTTTAAGAATATTTATATATAATTTTAACT
943527	'+'	1	1	33.63	7.72	7.62	2	Cj1012c	hypothetical protein	NA	450	0	0	0	1	1	0	0	1		AAATAAGCAAAATTTTGCTTATTTTAAGAATATTTATATATAATTTTAACT
943535	'+'	1	1	259.82	7.33	3.25	2	Cjp21	tRNA-Arg	0	77	1	0	0	0	1	0	0	1		AAAATTTTGCTTATTTTAAGAATATTTATATATAATTTTAACTTATTTTTG
943535	'+'	1	1	259.82	7.33	3.25	2	Cj1012c	hypothetical protein	NA	450	0	0	0	1	1	0	0	1		AAAATTTTGCTTATTTTAAGAATATTTATATATAATTTTAACTTATTTTTG
943574	'+'	1	1	364.78	5.75	12.31	2	Cjp21	tRNA-Arg	NA	77	0	0	1	0	1	0	0	1		AACTTATTTTTGCGCTCATAGCTCAGCTGGATAGAGCATTTGATTGCGGTT
943574	'+'	1	1	364.78	5.75	12.31	2	Cj1012c	hypothetical protein	NA	450	0	0	0	1	1	0	0	1		AACTTATTTTTGCGCTCATAGCTCAGCTGGATAGAGCATTTGATTGCGGTT
944723	'+'	1	1	2.96	>100	4.54	1	Cj1013c	putative cytochrome C biogenesis protein	NA	3246	0	0	0	1	1	0	0	1		TTTCGCTTAAATGCGCAACCATTAATACAACACCAGATAAAATAGAAGTTA
946203	'-'	1	1	46.94	6.29	4.22	1	Cj1013c	putative cytochrome C biogenesis protein	NA	3246	0	0	1	0	1	0	0	0		GCTATAAAAATGAAAGTAAAGAATTTTATATTTTTGAATATAATAAACCTA
946207	'-'	1	0	7.76	11.5	1.33	1	Cj1013c	putative cytochrome C biogenesis protein	NA	3246	0	0	1	0	1	0	0	0		TTAAGCTATAAAAATGAAAGTAAAGAATTTTATATTTTTGAATATAATAAA
946841	'+'	1	1	2.96	>100	>100	1	Cj1013c	putative cytochrome C biogenesis protein	NA	3246	0	0	0	1	1	0	0	1		TTTCTTTATAAGTATAATGAGCATTTAAGATTAAATCTTTATATTTTAATA
947303	'-'	1	1	38.4	4	4.24	1	Cj1013c	putative cytochrome C biogenesis protein	NA	3246	0	0	1	0	1	0	0	0		TAGGGCTTTAAAATTTAAAGGAAAAAGAATGAAAAATATAATAAAAAGCAT
948272	'-'	1	1	58.53	6.73	4.14	2	Cj1014c	branched-chain amino-acid ABC transporter ATP-binding protein	234	696	1	0	0	0	1	0	0	0		AGTTGAGATTGCAAGAGCAATGGCTACTCAACCAAGATTATTATTGCTTGA
948272	'-'	1	1	58.53	6.73	4.14	2	Cj1015c	branched-chain amino-acid ABC transporter ATP-binding protein	NA	771	0	0	1	0	1	0	0	0		AGTTGAGATTGCAAGAGCAATGGCTACTCAACCAAGATTATTATTGCTTGA
948661	'+'	1	1	43.04	12.58	6.95	1	Cj1015c	branched-chain amino-acid ABC transporter ATP-binding protein	NA	771	0	0	0	1	1	0	0	1		AGAAATTCAACCGAACCTGAACTAGGTTTATAGTTACCTGTTATAATATTA
949317	'+'	1	1	5.54	>100	>100	1	Cj1016c	branched-chain amino-acid ABC transporter permease	NA	1053	0	0	0	1	1	0	0	1		TATTTAGAATAAACTATATTTAAAATTAAAATAACCGCTACAATAGCAATA
953694	'-'	1	1	13.67	1.93	5.17	1	Cj1021c	putative periplasmic protein	24	192	1	0	0	0	1	0	0	0		TTTACACAAAGGTGGTCATTAACAAGGATTATCTTTTTTTGATATAATCGT
953852	'-'	1	1	16.72	5.15	2.36	2	Cj1021c	putative periplasmic protein	182	192	0	1	0	0	1	0	0	0		CATAGCTTAGATCAATTAAAAGACAAGCTTGCAAAAGTTATCATTATGGTC
953852	'-'	1	1	16.72	5.15	2.36	2	Cj1022c	putative integral membrane protein	NA	507	0	0	1	0	1	0	0	0		CATAGCTTAGATCAATTAAAAGACAAGCTTGCAAAAGTTATCATTATGGTC
954087	'-'	1	1	49.53	5.96	3.32	1	Cj1022c	putative integral membrane protein	NA	507	0	0	1	0	1	0	0	0		GTTTTTTATTGCAAGTTATGATGTTTTAAAAGTTATATTTTATACTTATAA
954678	'-'	1	0	8.67	8	1.43	1	Cj1023c	aspartate-semialdehyde dehydrogenase	NA	1032	0	0	1	0	1	0	0	0		TTTTTGCTTTTAAACTTGATGAATTTGAACCTCAAACTTTTCCTTATACTT
955506	'-'	1	0	22.18	3.73	1.26	2	Cj1023c	aspartate-semialdehyde dehydrogenase	237	1032	1	0	0	0	1	0	0	0		GAAGCTAAAAATGCTTTACTTGAATATGATTTTCCTGGTAATATTAGAGAA
955506	'-'	1	0	22.18	3.73	1.26	2	Cj1024c	sigma-54 associated transcriptional activator	NA	1302	0	0	1	0	1	0	0	0		GAAGCTAAAAATGCTTTACTTGAATATGATTTTCCTGGTAATATTAGAGAA
956593	'-'	1	0	31.59	5.08	1.45	1	Cj1024c	sigma-54 associated transcriptional activator	23	1302	1	0	0	0	1	0	0	0		ATCTTAAAAAAAAGTAAATTCAAAATTAAGCGCAAATTGGATACTATAGTA
956652	'+'	1	1	93.51	>100	14.92	1	Cj1024c	sigma-54 associated transcriptional activator	NA	1302	0	0	0	1	1	0	0	1		ATCCAATTTGCGCTTAATTTTGAATTTACTTTTTTTTAAGATAATAAATTA
956652	'+'	1	1	93.51	>100	14.92	1	Cj1025c	hypothetical protein	NA	450	0	0	0	1	1	0	0	1		ATCCAATTTGCGCTTAATTTTGAATTTACTTTTTTTTAAGATAATAAATTA
956690	'-'	1	1	6.28	20	8.29	2	Cj1024c	sigma-54 associated transcriptional activator	120	1302	0	1	0	0	1	0	0	0		AATACTGACTTATTACGTGCTCAAAGTGAAACTTATGTTAAAATTTTACCC
956690	'-'	1	1	6.28	20	8.29	2	Cj1025c	hypothetical protein	NA	450	0	0	1	0	1	0	0	0		AATACTGACTTATTACGTGCTCAAAGTGAAACTTATGTTAAAATTTTACCC
957593	'-'	1	1	2504.83	59.42	2.41	1	Cj1026c	putative lipoprotein	26	516	1	0	0	0	1	0	0	0		AGATTTGCAATAAGTTTAAAGTTGGAACGCTTATTGCTTTTTATTTTACTA
958008	'-'	1	1	77.98	100	4.5	1	Cj1027c	DNA gyrase subunit A	NA	2592	0	0	1	0	1	0	0	0		GTGGGGTGACGGCTATTAAGTTTAAAGAGAAAAATGACGAATTAGTAGGTG
959045	'-'	1	0	7.43	2.6	1.2	1	Cj1027c	DNA gyrase subunit A	NA	2592	0	0	1	0	1	0	0	0		AAGAGCTCATATTTTAGAAGGTCTTAAAATTGCACTTGATAATATAGATGA
960246	'-'	1	1	1266.23	4.92	9.19	1	Cj1027c	DNA gyrase subunit A	24	2592	1	0	0	0	1	0	0	0		TTTTGCTCTTGTTTTAGCTGATGCAAAAGTTTAATATGCTATAATCAAAAC
960539	'+'	1	1	11.09	31	9.28	1	Cj1028c	putative purine%2Fpyrimidine phosphoribosyltransferase	NA	576	0	0	0	1	1	0	0	1		AAAACAGGTTTTACAAATTTTGTTTTAAGATATCTAGCTAAAATAGCAGAA
961158	'-'	1	1	387.89	56.24	3.98	1	Cj1029c	putative liproprotein	NA	645	0	0	1	0	1	0	0	0		AAAAGGTTTTAAATGCTAAAGGGAAAAAGTTATTTGTCGATGTGAATTTTA
961500	'-'	1	0	124.92	2.3	1.92	1	Cj1029c	putative liproprotein	21	645	1	0	0	0	1	0	0	0		AATTTAAAACTTGGCTTGAAATTTGCTTGTATTTTTAATACAATTTTAAAA
961511	'-'	1	1	22.55	31	2.62	1	Cj1029c	putative liproprotein	32	645	0	1	0	0	1	0	0	0		GATTGATGATAAATTTAAAACTTGGCTTGAAATTTGCTTGTATTTTTAATA
961987	'+'	1	1	38.44	7.93	10.94	1	Cj1030c	GTP-binding protein LepA	NA	1797	0	0	0	1	1	0	0	1		ATCAAAACTCGCATAACCTTTTGTTAAGGACTTTAATTTATCATAAAAATC
963420	'-'	1	1	198.1	2.21	8.95	2	Cj1030c	GTP-binding protein LepA	68	1797	0	1	0	0	1	0	0	1		TTTAATATACTTTATATAAATTTCAATTAAAGTTTTTTATATAAAATAAAA
963420	'-'	1	1	198.1	2.21	8.95	2	Cj1031	multidrug efflux system outer membrane protein	NA	1275	0	0	0	1	1	0	0	1		TTTAATATACTTTATATAAATTTCAATTAAAGTTTTTTATATAAAATAAAA
963479	'+'	1	1	244.67	10.74	8.12	1	Cj1031	multidrug efflux system outer membrane protein	0	1275	1	0	0	0	1	0	0	0		ATATAAAAAACTTTAATTGAAATTTATATAAAGTATATTAAAATATCAAAA
963870	'-'	1	1	4.95	>100	31.5	1	Cj1031	multidrug efflux system outer membrane protein	NA	1275	0	0	0	1	1	0	0	1		GTTGATTGGCTAGTAAAATTTTTTCAAGACTTAAGGTGTTAAAATAAAGTG
964165	'-'	1	1	4.8	>100	4.92	1	Cj1031	multidrug efflux system outer membrane protein	NA	1275	0	0	0	1	1	0	0	1		TTTACACTTTCTTTAGCAAGATTGATTTGTTCTTTAGCTATCATTACTTCA
967028	'+'	1	0	7.12	9.5	1.33	1	Cj1033	multidrug efflux system membrane protein	NA	3018	0	0	1	0	1	0	0	0		TATGAAAATTTACTCTATAAAATTTTACAAAATAAAGTAAAATTTATCCTA
967288	'+'	1	0	19.59	14.25	1.48	1	Cj1033	multidrug efflux system membrane protein	NA	3018	0	0	1	0	1	0	0	0		TGATGATGCCAAAGATGCTACAAAGGCTAAAATTTATGTTAAACTTAAAAA
968549	'+'	1	1	4.03	>100	21.55	1	Cj1034c	adenylosuccinate lyase	NA	807	0	0	0	1	1	0	0	1		AAATTAAATTAACCAAAATGATTAATTTAATTTTTTTAAGTATTATTCTTA
969400	'-'	1	1	520.39	65	2.78	2	Cj1034c	adenylosuccinate lyase	60	807	1	0	0	0	1	0	0	0		ATTTTGTAAAAAAGTGTCAATCTTTATCTTATAAAGCCGATTATACACCTA
969400	'-'	1	1	520.39	65	2.78	2	Cj1035c	arginyl-tRNA-protein transferase	NA	720	0	0	1	0	1	0	0	0		ATTTTGTAAAAAAGTGTCAATCTTTATCTTATAAAGCCGATTATACACCTA
969666	'-'	1	1	23.28	6.73	3.5	1	Cj1035c	arginyl-tRNA-protein transferase	NA	720	0	0	1	0	1	0	0	0		AAAGAACTGGAAGCGTTATGATTTAAGCTTTAAACAGTATTATAATCTTTA
971788	'-'	1	1	157.82	20.71	4.25	1	Cj1037c	acetyl-CoA carboxylase subunit A	28	1446	1	0	0	0	1	0	0	0		AAATTAAATTTTTTGCTAAGTTTTTGTAAGGAAAATTTGCTAAAATTAACA
971858	'+'	1	1	28.83	>100	6.82	2	Cj1038	putative cell division%2Fpeptidoglycan biosynthesis protein	42	1164	1	0	0	0	1	0	0	1		CCTTACAAAAACTTAGCAAAAAATTTAATTTATTTTAGTTATAATAAAACT
971858	'+'	1	1	28.83	>100	6.82	2	Cj1037c	acetyl-CoA carboxylase subunit A	NA	1446	0	0	0	1	1	0	0	1		CCTTACAAAAACTTAGCAAAAAATTTAATTTATTTTAGTTATAATAAAACT
972950	'+'	1	1	64.68	3.74	6.67	2	Cj1039	undecaprenyldiphospho-muramoylpentapeptide beta-N- acetylglucosaminyltransferase	110	1029	1	0	0	0	1	0	0	0		TACTTTTACTTTTTTCTTTCTTTATGAATGCTTTTGGTATTATTTCTCTTA
972950	'+'	1	1	64.68	3.74	6.67	2	Cj1038	putative cell division%2Fpeptidoglycan biosynthesis protein	NA	1164	0	0	1	0	1	0	0	0		TACTTTTACTTTTTTCTTTCTTTATGAATGCTTTTGGTATTATTTCTCTTA
975248	'-'	1	1	62.09	2.68	4.59	2	Cj1040c	putative MFS transport protein	26	1164	1	0	0	0	1	0	0	0		GAAGGTAATATTTTATGGATTCCTAAGATGGTAGAAGGTAAAATATTCAAA
975248	'-'	1	1	62.09	2.68	4.59	2	Cj1041c	putative periplasmic ATP%2FGTP-binding protein	NA	852	0	0	1	0	1	0	0	0		GAAGGTAATATTTTATGGATTCCTAAGATGGTAGAAGGTAAAATATTCAAA
975456	'-'	1	1	7.76	11.5	2.61	2	Cj1040c	putative MFS transport protein	234	1164	0	1	0	0	1	0	0	0		TGTTGTAATGGCTTATGATTTAAATACAAAAGAACTCAGTATAATTAAAAA
975456	'-'	1	1	7.76	11.5	2.61	2	Cj1041c	putative periplasmic ATP%2FGTP-binding protein	NA	852	0	0	1	0	1	0	0	0		TGTTGTAATGGCTTATGATTTAAATACAAAAGAACTCAGTATAATTAAAAA
975860	'-'	1	1	5.54	2.5	2.42	1	Cj1041c	putative periplasmic ATP%2FGTP-binding protein	NA	852	0	0	1	0	1	0	0	0		GATGGATTTATTTCTAAGCTTGATAAAAATGGCAAAGTGCTAGAATATAAA
980628	'-'	1	1	12.94	3.06	2.44	2	Cj1047c	putative thiamine biosynthesis protein	84	192	1	0	0	0	1	0	0	0		ACGGTGTAAAGGTAGTAGAATTTGGGGTTTGTAATGATAGAATTCACGCTA
980628	'-'	1	1	12.94	3.06	2.44	2	Cj1048c	succinyl-diaminopimelate desuccinylase	NA	1098	0	0	1	0	1	0	0	0		ACGGTGTAAAGGTAGTAGAATTTGGGGTTTGTAATGATAGAATTCACGCTA
981685	'+'	1	1	2.96	>100	2.9	1	Cj1048c	succinyl-diaminopimelate desuccinylase	NA	1098	0	0	0	1	1	0	0	1		AATTCTTTTGCATTCATTTTTTATCCTAAGAAAGTTTTATATAATAAATTA
981685	'+'	1	1	2.96	>100	2.9	1	Cj1049c	putative LysE family transporter protein	NA	600	0	0	0	1	1	0	0	1		AATTCTTTTGCATTCATTTTTTATCCTAAGAAAGTTTTATATAATAAATTA
981697	'-'	1	1	41.02	56.5	4.93	2	Cj1048c	succinyl-diaminopimelate desuccinylase	46	1098	1	0	0	0	1	0	0	0		AGTGCAAAAGTTGTTTTTATAATCAATATAATTTCAGCTATAATTATAGAG
981697	'-'	1	1	41.02	56.5	4.93	2	Cj1049c	putative LysE family transporter protein	NA	600	0	0	1	0	1	0	0	0		AGTGCAAAAGTTGTTTTTATAATCAATATAATTTCAGCTATAATTATAGAG
982319	'-'	1	1	22.18	13.5	2.3	2	Cj1049c	putative LysE family transporter protein	65	600	1	0	0	0	1	0	0	0		ATTTATGAAAAAGATGTGAATTTAGAGCGATATTTTGATAAAATCTATATA
982319	'-'	1	1	22.18	13.5	2.3	2	Cj1050c	NAD-dependent deacetylase	NA	702	0	0	1	0	1	0	0	0		ATTTATGAAAAAGATGTGAATTTAGAGCGATATTTTGATAAAATCTATATA
982968	'-'	1	1	60.38	7.33	2.88	1	Cj1050c	NAD-dependent deacetylase	20	702	1	0	0	0	1	0	0	0		AATCTTGCAAAAATATTTATTTTCTTAAAGCATTTTTCGCTAAACTTTGTA
986717	'+'	1	1	13.32	>100	19.29	1	Cj1051c	restriction modification enzyme	NA	4020	0	0	0	1	1	0	0	1		TCTATAATCAAATAAGGATTGTTTTCATTATCCTTTACTAAAATATCAGCC
987649	'-'	1	1	15.52	>100	3.92	1	Cj1052c	recombination and DNA strand exchange inhibitor protein	NA	2211	0	0	1	0	1	0	0	0		GCTAAGCTTGAAAATGTTGAGAAAAAAGAGCAAAAAGTCGATGAAATTTTA
988154	'-'	1	1	93.14	51.4	4.37	1	Cj1052c	recombination and DNA strand exchange inhibitor protein	NA	2211	0	0	1	0	1	0	0	0		AAGTGAAAGTAAAATTGGTACTTTTAAAGAATTTGATGCCATCATAGAAGA
989338	'-'	1	1	10.72	>100	3.66	2	Cj1052c	recombination and DNA strand exchange inhibitor protein	109	2211	1	0	0	0	1	0	0	0		TTATCGTAGCTTTTAATCAAAATAAAAATATTTTATGTAAAGATATCAATG
989338	'-'	1	1	10.72	>100	3.66	2	Cj1053c	putative integral membrane protein	NA	351	0	0	1	0	1	0	0	0		TTATCGTAGCTTTTAATCAAAATAAAAATATTTTATGTAAAGATATCAATG
990881	'-'	1	1	578.04	5.81	7.49	1	Cj1054c	UDP-N-acetylmuramate--L-alanine ligase	21	1299	1	0	0	0	1	0	0	0		CAAAATAGGATTTATATTTTCTTTTTAGTAAAAAAGTGCTAAAATTTAGCC
990887	'-'	1	1	9.24	>100	2.58	1	Cj1054c	UDP-N-acetylmuramate--L-alanine ligase	27	1299	0	1	0	0	1	0	0	0		GCATTTCAAAATAGGATTTATATTTTCTTTTTAGTAAAAAAGTGCTAAAAT
991386	'+'	1	1	3.41	>100	6.81	1	Cj1055c	putative sulfatase family protein	NA	1974	0	0	0	1	1	0	0	1		ATACTCATTTCGCGTACTCTATGATCTCCAGTTGCTGCTATAATAACACTA
991472	'+'	1	1	8.13	8.33	28.36	1	Cj1055c	putative sulfatase family protein	NA	1974	0	0	0	1	1	0	0	1		TTTTCCAAATTCATTATTTGCATAAGTATAAGCTTTGATAATATTATCTTG
991926	'+'	1	1	4.44	>100	13.61	1	Cj1055c	putative sulfatase family protein	NA	1974	0	0	0	1	1	0	0	1		GAAAATGGACTTACAAAAAATAAGTTTGCAAAACTTGGTATAGTTCCATTA
992215	'-'	1	0	13.67	>100	1.81	1	Cj1055c	putative sulfatase family protein	NA	1974	0	0	1	0	1	0	0	0		ACAAAATTATTCTTTTAGTGAGTATAGTGTTGTAAATGATACAATGTTAAA
992355	'-'	1	1	18.11	2.5	2.51	1	Cj1055c	putative sulfatase family protein	NA	1974	0	0	1	0	1	0	0	0		TTTTTAAATTTGAAAATATTAAATTTAAAGCTAAAACCTGTTAATTTAAGA
992486	'-'	1	1	2.59	2	6.63	1	Cj1055c	putative sulfatase family protein	NA	1974	0	0	1	0	1	0	0	0		AGACTAAATTTGATATTTTTATGTTTACTCTAAAAGATGATAATACAAAAA
997029	'-'	1	1	23.28	11.5	4.08	2	Cj1060c	hypothetical protein	246	111	1	0	0	0	1	0	0	0		GAGAAATTTTTTGAACAAATTGATATACTTAAAAAAGATAAAATCATTAAA
997029	'-'	1	1	23.28	11.5	4.08	2	Cj1061c	isoleucyl-tRNA synthetase	NA	2754	0	0	1	0	1	0	0	0		GAGAAATTTTTTGAACAAATTGATATACTTAAAAAAGATAAAATCATTAAA
999554	'-'	1	1	1665.39	26.6	4.68	2	Cj1061c	isoleucyl-tRNA synthetase	24	2754	1	0	0	0	1	0	0	1		TATAGCCAAAAACAAAGTAGAAATTAAAGCTAATTTGAGTAGAATTTAAGA
999554	'-'	1	1	1665.39	26.6	4.68	2	Cj1062	putative CinA-like protein	NA	1089	0	0	0	1	1	0	0	1		TATAGCCAAAAACAAAGTAGAAATTAAAGCTAATTTGAGTAGAATTTAAGA
999844	'-'	1	1	5.17	4.5	16.58	1	Cj1062	putative CinA-like protein	NA	1089	0	0	0	1	1	0	0	1		TCATCTTTTAAGATAAGATTATCATCATTTAAAGTTGCTAAAATTTTAGCA
1001190	'+'	1	1	645.68	65.7	5.11	1	Cj1064	pseudo	28	620	1	0	0	0	1	0	0	0		AATATCAAACTATAATATTTTTTGATTAAGCTTTGCATTTTATAATTAATA
1001432	'-'	1	1	3.7	>100	>100	1	Cj1064	pseudo	NA	620	0	0	0	1	1	0	0	1		CATCTTTGCTTTGAAGATCTTTTCTTGCTAGAAAAATGATATTATGACTCG
1002532	'+'	1	1	41.76	40	5.72	1	Cj1067	CDP-diacylglycerol--glycerol-3-phosphate 3-phosphatidyltransferase	35	537	1	0	0	0	1	0	0	0		TTCTTTTTTGTATTTTTACTAAGTCTTTGCTTAAATTTTATACAATTTTGA
1002545	'+'	1	1	70.59	2.06	5.69	1	Cj1067	CDP-diacylglycerol--glycerol-3-phosphate 3-phosphatidyltransferase	22	537	0	1	0	0	1	0	0	0		TTTTACTAAGTCTTTGCTTAAATTTTATACAATTTTGATTATAATTTTACA
1002850	'-'	1	1	3.33	5.5	12.48	1	Cj1067	CDP-diacylglycerol--glycerol-3-phosphate 3-phosphatidyltransferase	NA	537	0	0	0	1	1	0	0	1		CAACTCTAAAACCTGTGATAAAAAATTCCCTTACTAGTATAATATAAATTA
1003360	'+'	1	0	3.1	>100	1.76	1	Cj1068	putative peptidase M50 family protein	NA	1107	0	0	1	0	1	0	0	0		AACTATCGCTTAAGCACTTTACCACTTGGAGGATATGTTAAACTTAAAGGA
1004682	'-'	1	1	7.02	2.57	>100	1	Cj1069	hypothetical protein	NA	867	0	0	0	1	1	0	0	1		ACATTTTTTAGTTAAAATTTTATTAATTTCTAAAATATTAAAATCTTTGTA
1005087	'+'	1	1	4.8	14	7.94	1	Cj1070	30S ribosomal protein S6	65	378	0	1	0	0	1	0	0	0		TAGATAAAACCTTAAGTATTCAAGACTAATTAAGTATATTTTGATATAATC
1005092	'+'	1	1	2478.12	27.82	6.79	1	Cj1070	30S ribosomal protein S6	60	378	1	0	0	0	1	0	0	0		AAAACCTTAAGTATTCAAGACTAATTAAGTATATTTTGATATAATCTAGTC
1006747	'-'	1	0	11.09	3	1.71	1	Cj1073c	ATP-dependent protease La	NA	2376	0	0	1	0	1	0	0	0		AAATAATTATTGATCCTAAAGTTAATGTTTATGATAGTTATAATATTCATA
1009492	'-'	1	1	174.45	2.72	7.91	1	Cj1074c	putative lipoprotein	32	648	1	0	0	0	1	0	0	0		TTAATTTTATTATAATTTTAGAAGAACATAATTATAAAATCGTTAAAATAT
1009520	'-'	1	1	100.53	5	8.04	1	Cj1074c	putative lipoprotein	60	648	0	1	0	0	1	0	0	0		AATCATTCCAAAATTTTAAATTATTTAATTAATTTTATTATAATTTTAGAA
1009545	'+'	1	1	10.35	3.67	6.81	2	Cj1075	flagellar assembly protein FliW	76	390	0	1	0	0	1	0	0	1		TTTTAACGATTTTATAATTATGTTCTTCTAAAATTATAATAAAATTAATTA
1009545	'+'	1	1	10.35	3.67	6.81	2	Cj1074c	putative lipoprotein	NA	648	0	0	0	1	1	0	0	1		TTTTAACGATTTTATAATTATGTTCTTCTAAAATTATAATAAAATTAATTA
1009573	'-'	1	1	3.72	>100	5.39	2	Cj1074c	putative lipoprotein	113	648	0	1	0	0	1	0	0	1		CATGTTTTCTCCTCAAGTTATAATGTTTAATATTTTAACATAAAATAAGCA
1009573	'-'	1	1	3.72	>100	5.39	2	Cj1075	flagellar assembly protein FliW	NA	390	0	0	0	1	1	0	0	1		CATGTTTTCTCCTCAAGTTATAATGTTTAATATTTTAACATAAAATAAGCA
1009588	'+'	1	0	12.94	3.92	1.89	1	Cj1075	flagellar assembly protein FliW	33	390	1	0	0	0	1	0	0	0		ATTAATTAAATAATTTAAAATTTTGGAATGATTATTGCTTATTTTATGTTA
1010176	'-'	1	1	7.74	3.12	6.08	1	Cj1076	pyrroline-5-carboxylate reductase	NA	732	0	0	0	1	1	0	0	1		GCATTTGAGCAATATTTTCTAAAGCATAAGGTTTAAATGCTAAAATAACAT
1010309	'-'	1	0	6.81	9	1.87	1	Cj1076	pyrroline-5-carboxylate reductase	NA	732	0	0	0	1	1	0	0	1		GGTGTGGTTGAAGCCTTGTATTTAGCTGCTGTATTGGGTATTATTCTAACA
1010325	'+'	1	1	6.28	5.25	4.35	1	Cj1076	pyrroline-5-carboxylate reductase	NA	732	0	0	1	0	1	0	0	0		TTGAAAAACTACAAACCATCAAAGCTCAAAATTATGTTAGAATAATACCCA
1011008	'-'	1	1	10.72	17	5.19	1	Cj1077	putative periplasmic protein	NA	303	0	0	0	1	1	0	0	1		AAAGTGTAAAAGCTTTGCTCATTCTTTAAAATAAACGCTATAATTTTGATC
1011008	'-'	1	1	10.72	17	5.19	1	Cj1078	putative periplasmic protein	NA	663	0	0	0	1	1	0	0	1		AAAGTGTAAAAGCTTTGCTCATTCTTTAAAATAAACGCTATAATTTTGATC
1011156	'-'	1	1	11.46	8.75	10.78	1	Cj1078	putative periplasmic protein	NA	663	0	0	0	1	1	0	0	1		TTTTCTATTTTAAGCAAGTTTAAATGTGCTTGAGTGATAAGATTGTTTGTA
1012025	'-'	1	1	7.12	4.29	4.97	1	Cj1079	putative periplasmic protein	NA	453	0	0	0	1	1	0	0	1		ACGTTTTTATCACGATTTAAAGCAATACTAATGTGGGCTATAATAACACCA
1014627	'+'	1	1	2.17	2.17	13.61	1	Cj1083c	putative nuclease	NA	687	0	0	0	1	1	0	0	1		ATACTTTCTACTAAGCCTTTTAAACGCTTGGCTTTGGTATTATAAAACCCG
1017402	'-'	1	1	123.07	>100	4.92	1	Cj1085c	transcription-repair coupling factor	NA	2937	0	0	1	0	1	0	0	0		AAAAAAGAGTTTGTTGCTATAGAGTATCAAAATTCTGATAAGCTTTTATTA
1019963	'-'	1	1	1778.48	5.44	5.83	2	Cj1087c	putative peptidase	164	903	1	0	0	0	1	0	0	0		ATTTTTCAAATTTTAAATACATTAAAGCCTATTATTGATACAATACAAATA
1019963	'-'	1	1	1778.48	5.44	5.83	2	Cj1088c	folylpolyglutamate synthase%2Fdihydrofolate synthase	NA	1185	0	0	1	0	1	0	0	0		ATTTTTCAAATTTTAAATACATTAAAGCCTATTATTGATACAATACAAATA
1020575	'-'	1	0	7.39	7.67	1.79	1	Cj1088c	folylpolyglutamate synthase%2Fdihydrofolate synthase	NA	1185	0	0	1	0	1	0	0	0		CAAAAATTAAGTTATTTCGAATATGCTACTTTTTTAGCTATGATTTTATTT
1020891	'-'	1	1	15.52	>100	4.07	1	Cj1088c	folylpolyglutamate synthase%2Fdihydrofolate synthase	NA	1185	0	0	1	0	1	0	0	0		AGTTGAGAATTTTTTAGCTCAAAAAAGTATAAATTACGATAAAATTGATCG
1022585	'-'	1	1	9.98	1.71	2.21	2	Cj1089c	hypothetical protein	252	1398	1	0	0	0	1	0	0	0		ACTTGCTTTAAAACACGAGGCAGATGATGTAATTAATGTTAAAATGAATAA
1022585	'-'	1	1	9.98	1.71	2.21	2	Cj1090c	putative lipoprotein	NA	513	0	0	1	0	1	0	0	0		ACTTGCTTTAAAACACGAGGCAGATGATGTAATTAATGTTAAAATGAATAA
1024886	'-'	1	0	6.19	5	1.34	1	Cj1091c	leucyl-tRNA synthetase	NA	2430	0	0	1	0	1	0	0	0		AAAAAGAACTTTTTTCTTTAGGTTTTTCTTTTTCTAAAAAAAGAATGCTTG
1025104	'+'	1	1	5.17	>100	19.89	1	Cj1091c	leucyl-tRNA synthetase	NA	2430	0	0	0	1	1	0	0	1		CTATCTTGCGATAATATCTTGCTAAAGCATCACCTATAGTATAATTTCTTA
1027898	'+'	1	1	13.63	10	11.35	2	Cj1095	apolipoprotein N-acyltransferase	156	1326	1	0	0	0	1	0	0	1		TTTTGCAGTAACATTGTCTTCATTAAGCTTAACTTTGATAAAATCCTCCTC
1027898	'+'	1	1	13.63	10	11.35	2	Cj1093c	preprotein translocase subunit SecD	NA	1581	0	0	0	1	1	0	0	1		TTTTGCAGTAACATTGTCTTCATTAAGCTTAACTTTGATAAAATCCTCCTC
1027898	'+'	1	1	13.63	10	11.35	2	Cj1094c	preprotein translocase subunit YajC	NA	273	0	0	0	1	1	0	0	1		TTTTGCAGTAACATTGTCTTCATTAAGCTTAACTTTGATAAAATCCTCCTC
1027931	'-'	1	0	25.87	6.74	1.37	2	Cj1093c	preprotein translocase subunit SecD	115	1581	1	0	0	0	1	0	0	0		CACATAAACAAATGCTTGAGTCTTTGCAAAAAGGAGATAAAATCATCACTA
1027931	'-'	1	0	25.87	6.74	1.37	2	Cj1094c	preprotein translocase subunit YajC	NA	273	0	0	1	0	1	0	0	0		CACATAAACAAATGCTTGAGTCTTTGCAAAAAGGAGATAAAATCATCACTA
1028111	'-'	1	1	328.57	11.58	7.12	2	Cj1094c	preprotein translocase subunit YajC	30	273	1	0	0	0	1	0	0	1		TAAAATTGCAATAAAAAAGACTTTTATTATTTTAAAAATGATAGAATTAGT
1028111	'-'	1	1	328.57	11.58	7.12	2	Cj1095	apolipoprotein N-acyltransferase	NA	1326	0	0	0	1	1	0	0	1		TAAAATTGCAATAAAAAAGACTTTTATTATTTTAAAAATGATAGAATTAGT
1028927	'-'	1	1	4.64	16	26.52	1	Cj1095	apolipoprotein N-acyltransferase	NA	1326	0	0	0	1	1	0	0	1		TAAAATATAGACATTGCCTTTTTTAAAGATATAAGTGCTATTGTAAGTATG
1029200	'-'	1	1	12.2	26	10.78	1	Cj1095	apolipoprotein N-acyltransferase	NA	1326	0	0	0	1	1	0	0	1		ATAAAATTTCATTAAGAGTTGCTGGAGTTTGTATTCGCTACTATTATTAAA
1030836	'-'	1	1	1080.32	45.29	8.02	1	Cj1096c	S-adenosylmethionine synthetase	24	1197	1	0	0	0	1	0	0	0		AATTTTTAATTTATCAAGCTTTGATAAGTTTATTTGGATACAATTGTGGTT
1030921	'+'	1	1	434.64	74.5	8.96	1	Cj1097	serine%2Fthreonine transporter SstT	32	1224	0	1	0	0	1	0	0	0		TGATAAATTAAAAATTCTCTAAAATTAAGCAAAAGTTAGTTAAAATCAACT
1032630	'+'	1	0	6.5	6.33	1.2	1	Cj1098	aspartate carbamoyltransferase catalytic subunit	NA	888	0	0	1	0	1	0	0	0		TACTCGATTTGTTTACGATTTATAATCATTTTCAAGGTAATGTTGAAGGTA
1034007	'-'	1	1	3.72	>100	>100	1	Cj1099	peptidase	NA	1722	0	0	0	1	1	0	0	1		AACATCAATCCAACCTTGATCAAAAGCATTTTTTGCTATATCATAAAATTG
1034284	'-'	1	1	130.84	6.06	4.85	1	Cj1099	peptidase	NA	1722	0	0	0	1	1	0	0	1		ATAAAGATAAGAGTTCTTCTTTTTTTAACTTATCTTTAATAAAATCAAATA
1034336	'-'	1	1	25.87	>100	4.97	1	Cj1099	peptidase	NA	1722	0	0	0	1	1	0	0	1		AAATTAATTTGTCTATAAAAAGTTGCAAAAATATCTTCGATTTTATTTGCA
1035767	'-'	1	1	5.91	7	11.6	1	Cj1101	ATP-dependent DNA helicase	NA	2076	0	0	0	1	1	0	0	1		TTAGCAATAAAAGATCATCAAAATCTACAAAATTTTGTTTTAATAAGTATT
1036065	'+'	1	1	22.91	7.89	3.82	1	Cj1101	ATP-dependent DNA helicase	NA	2076	0	0	1	0	1	0	0	0		GAAAATATTTTAAATTTTCAAAATGATTTTAAAAATGTTAAACTTGTAAAA
1037268	'+'	1	1	99.79	91	5.13	2	Cj1102	tRNA pseudouridine synthase B	30	819	1	0	0	0	1	0	0	0		AGCGGAAAAGAGGAAAAGCTTAATATTAATTTTGGTGGTATAATGCGTGTA
1037268	'+'	1	1	99.79	91	5.13	2	Cj1101	ATP-dependent DNA helicase	NA	2076	0	0	1	0	1	0	0	0		AGCGGAAAAGAGGAAAAGCTTAATATTAATTTTGGTGGTATAATGCGTGTA
1037579	'-'	1	1	3.7	11	>100	1	Cj1102	tRNA pseudouridine synthase B	NA	819	0	0	0	1	1	0	0	1		TAGGAGATAATTCCTTGCATTTGATCAATGATTTGTTGTAAATTTGGAAGA
1037935	'+'	1	1	161.51	>100	5.92	2	Cj1103	carbon storage regulator	175	228	1	0	0	0	1	0	0	0		CAAATTTGTTTATAATAATGAGAAAAGCTTAAATGTGTTAAAATACATTAA
1037935	'+'	1	1	161.51	>100	5.92	2	Cj1102	tRNA pseudouridine synthase B	NA	819	0	0	1	0	1	0	0	0		CAAATTTGTTTATAATAATGAGAAAAGCTTAAATGTGTTAAAATACATTAA
1038042	'-'	1	1	34.74	17	9.39	1	Cj1102	tRNA pseudouridine synthase B	NA	819	0	0	0	1	1	0	0	1		AAGATATTTTACTGTATTTTCTTTAATATTAATTATGCTAAAATATTTTTC
1038042	'-'	1	1	34.74	17	9.39	1	Cj1103	carbon storage regulator	NA	228	0	0	0	1	1	0	0	1		AAGATATTTTACTGTATTTTCTTTAATATTAATTATGCTAAAATATTTTTC
1038549	'-'	1	1	2.48	9	>100	1	Cj1104	4-diphosphocytidyl-2-C-methyl-D-erythritol kinase	NA	768	0	0	0	1	1	0	0	1		TTTAGACTTTTTTTGCTAAATAATTCTTTTAATTCGTTATTATATCTTCTA
1038615	'+'	1	1	43.66	4.29	10.25	1	Cj1104	4-diphosphocytidyl-2-C-methyl-D-erythritol kinase	NA	768	0	0	1	0	1	0	0	0		GAATTAAAAGAATTATTTAGCAAAAAAAGTCTAAAACTCACAAAAAATATC
1039038	'+'	1	1	395.1	2.26	6.34	2	Cj1105	SsrA-binding protein	60	453	1	0	0	0	1	0	0	0		TTAAATGATTTATTTACTCCTTGTGCAACTTTATATCCTAAAATGAAGTCT
1039038	'+'	1	1	395.1	2.26	6.34	2	Cj1104	4-diphosphocytidyl-2-C-methyl-D-erythritol kinase	NA	768	0	0	1	0	1	0	0	0		TTAAATGATTTATTTACTCCTTGTGCAACTTTATATCCTAAAATGAAGTCT
1039404	'+'	1	0	5.17	8	0.95	2	Cj1106	putative periplasmic thioredoxin	157	603	1	0	0	0	1	0	0	0		AAATTGATAAATTATTAGGTAAAGTAAGTATAGAAGGATATACTATCGTTG
1039404	'+'	1	0	5.17	8	0.95	2	Cj1105	SsrA-binding protein	NA	453	0	0	1	0	1	0	0	0		AAATTGATAAATTATTAGGTAAAGTAAGTATAGAAGGATATACTATCGTTG
1039410	'-'	1	1	9.29	6.5	2.71	1	Cj1105	SsrA-binding protein	NA	453	0	0	0	1	1	0	0	1		AGCTAAAGCAAGGGTAGCTTTTACTTTATTTTTTGTGTTAAAATAAAGATC
1039649	'-'	1	1	6.65	>100	6.96	1	Cj1105	SsrA-binding protein	NA	453	0	0	0	1	1	0	0	1		CATTTACACTATTTAAGACTATTTTATCTCCTTTGTGATACTCTTCAAACA
1039649	'-'	1	1	6.65	>100	6.96	1	Cj1106	putative periplasmic thioredoxin	NA	603	0	0	0	1	1	0	0	1		CATTTACACTATTTAAGACTATTTTATCTCCTTTGTGATACTCTTCAAACA
1039837	'-'	1	1	17.37	8.83	12.03	1	Cj1106	putative periplasmic thioredoxin	NA	603	0	0	0	1	1	0	0	1		ATCTTCAAAATGTGTAAGTCCTATAATGATAAATTTGCTAGAATTATTTTT
1040086	'+'	1	1	6.5	4	2.02	2	Cj1107	ATP-dependent Clp protease adaptor protein	77	291	1	0	0	0	1	0	0	0		TAAAAAATGGAATTTATCAAAAAATAAGCGATTACTGGAATAATAATACTC
1040086	'+'	1	1	6.5	4	2.02	2	Cj1106	putative periplasmic thioredoxin	NA	603	0	0	1	0	1	0	0	0		TAAAAAATGGAATTTATCAAAAAATAAGCGATTACTGGAATAATAATACTC
1041464	'-'	1	1	3.7	4.2	>100	1	Cj1108	ATP-dependent Clp protease ATP-binding subunit	NA	2130	0	0	0	1	1	0	0	1		AATTACAGCATATTGAAGAATTTCATCGTTTAATTTGATATGATGAAATTC
1042435	'+'	1	1	17.93	2.07	2.47	2	Cj1109	leucyl%2Fphenylalanyl-tRNA--protein transferase	119	648	1	0	0	0	1	0	0	0		GTGGATGATAAAGCTAAAATTTATTTAGCTAAAAAAGCCTATAATAAAGAA
1042435	'+'	1	1	17.93	2.07	2.47	2	Cj1108	ATP-dependent Clp protease ATP-binding subunit	NA	2130	0	0	1	0	1	0	0	0		GTGGATGATAAAGCTAAAATTTATTTAGCTAAAAAAGCCTATAATAAAGAA
1043049	'-'	1	1	7.76	22	24.96	1	Cj1109	leucyl%2Fphenylalanyl-tRNA--protein transferase	NA	648	0	0	0	1	1	0	0	1		AAATTCTAAATGTTGGTTATAAACTTGACAATCTATGATAAAATCATAAGG
1043285	'-'	1	1	47.69	2.18	2.8	2	Cj1110c	putative MCP-type signal transduction protein	NA	1290	0	0	1	0	1	0	0	1		TTAAAAGCGGTTTAGAGGATGTTAATCAGAGTGTTGAACTTGCAAAAGAAG
1043285	'-'	1	1	47.69	2.18	2.8	2	Cj1109	leucyl%2Fphenylalanyl-tRNA--protein transferase	NA	648	0	0	0	1	1	0	0	1		TTAAAAGCGGTTTAGAGGATGTTAATCAGAGTGTTGAACTTGCAAAAGAAG
1043832	'+'	1	1	7.76	>100	>100	1	Cj1110c	putative MCP-type signal transduction protein	NA	1290	0	0	0	1	1	0	0	1		CCATCATCATTTTTAACCGGATTATAACTTGCTTCAAGGTATACTTTTTTA
1044551	'-'	1	1	10.72	2.21	3.54	1	Cj1110c	putative MCP-type signal transduction protein	39	1290	0	1	0	0	1	0	0	0		AACTTATAAATTAATATAATTTTAAGTAAATAATACTATATAAATATGATA
1045614	'-'	1	1	83.53	2.04	2.37	2	Cj1112c	methionine sulfoxide reductase B	21	360	1	0	0	0	1	0	0	1		TTATAAAAATTTATCATTTAAAATTGAAATTTTAATTATATAATATAAAAA
1045614	'-'	1	1	83.53	2.04	2.37	2	Cj1113	hypothetical protein	NA	798	0	0	0	1	1	0	0	1		TTATAAAAATTTATCATTTAAAATTGAAATTTTAATTATATAATATAAAAA
1045637	'+'	1	1	38.44	7.5	6.81	2	Cj1113	hypothetical protein	46	798	1	0	0	0	1	0	0	1		CTTTCATGATCTGCCCTTGTAAAATAATTTTTATATTATATAATTAAAATT
1045637	'+'	1	1	38.44	7.5	6.81	2	Cj1112c	methionine sulfoxide reductase B	NA	360	0	0	0	1	1	0	0	1		CTTTCATGATCTGCCCTTGTAAAATAATTTTTATATTATATAATTAAAATT
1046270	'-'	1	1	40.29	5.3	8.09	1	Cj1113	hypothetical protein	NA	798	0	0	0	1	1	0	0	1		GTATCTCCTTTTTTAACGTGTTTTATTTCATCATTAAGTATAATTTCAAGA
1046345	'-'	1	1	6.65	1.86	6.16	1	Cj1113	hypothetical protein	NA	798	0	0	0	1	1	0	0	1		GCAAGAGAGAATTGTTTAAATGTTTTGCAAAGCTCGATAAAATTATACTTG
1046688	'+'	1	1	5.91	>100	21.55	1	Cj1114c	CDP-diacylglycerol--serine O-phosphatidyltransferase	NA	729	0	0	0	1	1	0	0	1		AACGATTAAAATCAAGCTTTTTAAAGCTAGGATAGCGTATATTACTTACCA
1047128	'+'	1	1	13.31	7	11.6	1	Cj1114c	CDP-diacylglycerol--serine O-phosphatidyltransferase	NA	729	0	0	0	1	1	0	0	1		TAAATCAAAGCTGTATAATAATTTCCATGTATTGAAGCTATAATAGAAATA
1047128	'+'	1	1	13.31	7	11.6	1	Cj1115c	putative phosphatidylserine decarboxylase-related protein	NA	618	0	0	0	1	1	0	0	1		TAAATCAAAGCTGTATAATAATTTCCATGTATTGAAGCTATAATAGAAATA
1047260	'-'	1	0	19.22	11.4	1.59	2	Cj1114c	CDP-diacylglycerol--serine O-phosphatidyltransferase	61	729	1	0	0	0	1	0	0	0		ATCAATGGCTCTATAAGTTTACTTTTACCAAAAGATACTAGAATTCACATA
1047260	'-'	1	0	19.22	11.4	1.59	2	Cj1115c	putative phosphatidylserine decarboxylase-related protein	NA	618	0	0	1	0	1	0	0	0		ATCAATGGCTCTATAAGTTTACTTTTACCAAAAGATACTAGAATTCACATA
1048497	'-'	1	1	9.29	3.4	2.86	1	Cj1116c	membrane bound zinc metallopeptidase	NA	1938	0	0	1	0	1	0	0	0		AAAAATATGTAGAACAAAATGATTTAGTTGAAGCTGTTGAAAGAGCTATAG
1048678	'-'	1	1	89.07	19.54	4	1	Cj1116c	membrane bound zinc metallopeptidase	NA	1938	0	0	1	0	1	0	0	0		GTTTTAGTTGATAAACCTGATTTTAAAGGTAGGTGTGATATTTTAAAAGTG
1049488	'+'	1	1	4.64	>100	9.95	1	Cj1116c	membrane bound zinc metallopeptidase	NA	1938	0	0	0	1	1	0	0	1		AAACTCACAAGCTCAGGATCATTAACTTTTTTTGCTGTATAAACAGTATTG
1049759	'+'	1	1	5.17	>100	4.14	1	Cj1116c	membrane bound zinc metallopeptidase	NA	1938	0	0	0	1	1	0	0	1		AAAAATTATTACCCTGCGGATTACCCTTATTATTTTGGGTATTATTATTCA
1049759	'+'	1	1	5.17	>100	4.14	1	Cj1117c	ribosomal protein L11 methyltransferase	NA	846	0	0	0	1	1	0	0	1		AAAAATTATTACCCTGCGGATTACCCTTATTATTTTGGGTATTATTATTCA
1049887	'-'	1	1	655.66	>100	4.87	2	Cj1116c	membrane bound zinc metallopeptidase	127	1938	1	0	0	0	1	0	0	0		TTAGAAAAAGATATTAAAAACCATTTAGAAGATAATGCTATACTTATTTTG
1049887	'-'	1	1	655.66	>100	4.87	2	Cj1117c	ribosomal protein L11 methyltransferase	NA	846	0	0	1	0	1	0	0	0		TTAGAAAAAGATATTAAAAACCATTTAGAAGATAATGCTATACTTATTTTG
1050204	'+'	1	1	5.54	6	4.8	1	Cj1117c	ribosomal protein L11 methyltransferase	NA	846	0	0	0	1	1	0	0	1		ATCTAAAGCTCTTAATTTACTTTTAGAAAATTTTTGTAAAAATTTTACACA
1050275	'+'	1	1	7.12	2.28	11.33	1	Cj1117c	ribosomal protein L11 methyltransferase	NA	846	0	0	0	1	1	0	0	1		GTCCTGAGCCAAAGGCTAAGGCTGGATTAATCTTTATATTTATACAATTCT
1051105	'-'	1	1	705.55	3.42	9.68	1	Cj1118c	chemotaxis regulatory protein	81	393	1	0	0	0	1	0	0	0		TAAAAATAATAATATTTGAGTAAAAATTTAAGTAAAAGATGATATAATGCT
1051972	'+'	1	1	2.59	>100	6.63	1	Cj1119c	putative integral membrane protein	NA	894	0	0	0	1	1	0	0	1		GGTGAATGTCAGGAAGTTTATTGGGCAGATTTCTTGTTAAAATATAACTCA
1051972	'+'	1	1	2.59	>100	6.63	1	Cj1120c	UDP-GlcNAc C4%2C6 dehydratase	NA	1773	0	0	0	1	1	0	0	1		GGTGAATGTCAGGAAGTTTATTGGGCAGATTTCTTGTTAAAATATAACTCA
1055001	'-'	1	1	405.44	>100	3.38	1	Cj1121c	UDP-4-keto-6-deoxy-GlcNAc C4 aminotransferase	37	1161	1	0	0	0	1	0	0	0		AGAATTTAAATATTTGAATCTTTGTAAATTTTTTTAGGTAAAATAGAGTCA
1055483	'-'	1	1	374.77	9.66	4.4	1	Cj1122c	putative integral membrane protein	NA	654	0	0	1	0	1	0	0	0		CTTTTTAGTCTTAAAGCAAATGTAAATTCTAAAAATAGTAGGATTATAAAA
1056899	'+'	1	1	5.54	3.5	23.82	1	Cj1124c	galactosyltransferase	NA	603	0	0	0	1	1	0	0	1		TTAATTACCCTATCATAAAGTTTTAAATAACGCTGTGCGATTATATTTTCA
1056899	'+'	1	1	5.54	3.5	23.82	1	Cj1125c	GalNAc transferase	NA	1131	0	0	0	1	1	0	0	1		TTAATTACCCTATCATAAAGTTTTAAATAACGCTGTGCGATTATATTTTCA
1059165	'+'	1	1	2.59	8	9.95	1	Cj1126c	oligosaccharide transferase to N-glycosylate proteins	NA	2142	0	0	0	1	1	0	0	1		AAACAATTTCACTACCACTAATTCTTCGCATAAATTCGCTAAAATCTACAT
1060678	'-'	1	1	70.96	33	3.74	1	Cj1127c	GalNAc transferase	NA	1098	0	0	1	0	1	0	0	0		TAAGTCCAAAAAAATGTGAAATTTTATACAATGCCATCGATTTAGAAAACA
1061262	'-'	1	1	43.24	8.8	2.93	2	Cj1127c	GalNAc transferase	41	1098	1	0	0	0	1	0	0	0		TAAAAATCAACGCTCCTGCTTTGATATTACTCATTTTAAGTATAATTCCAA
1061262	'-'	1	1	43.24	8.8	2.93	2	Cj1128c	glucosyl transferase	NA	930	0	0	1	0	1	0	0	0		TAAAAATCAACGCTCCTGCTTTGATATTACTCATTTTAAGTATAATTCCAA
1065911	'-'	1	1	312.49	1.82	7.31	1	Cj1131c	UDP-GlcNAc%2FGlc 4-epimerase	30	987	1	0	0	0	1	0	0	0		AAATTTCAAAAGTTCGATCTTAAGTATTTAAGAAAATATATTAAAATTTAT
1067044	'+'	1	0	30.31	19.6	1.91	1	Cj1133	heptosyltransferase I	NA	1029	0	0	1	0	1	0	0	0		AAAAGCCTAAAAATTCTTCTTAAAGCAAGAAAAAACAACTATAATGCAGTA
1067079	'-'	1	1	5.17	>100	4.76	1	Cj1133	heptosyltransferase I	NA	1029	0	0	0	1	1	0	0	1		TAAGACTATTTTTATCAAAACCAAAATTATTTCTACTTAAAATTCGACTTA
1069169	'-'	1	1	9.98	28	31.77	1	Cj1135	putative two-domain glucosyltransferase	NA	1548	0	0	0	1	1	0	0	1		AGCATAATGCCTTAATCCATTTTTAAGATAAATTTTTTTAGCATTACTTGG
1070998	'-'	1	1	15.15	21.5	6.97	1	Cj1136	putative glycosyltransferase	NA	1173	0	0	0	1	1	0	0	1		CTATTTGCCCTCAAACGGCATAAGTACAATCTTTTTGGTAAAATATAGATA
1071337	'+'	1	1	53.57	13.33	7.27	2	Cj1136	putative glycosyltransferase	NA	1173	0	0	1	0	1	0	0	1		TTTAAAAAAGATCCTTTGAATTTAAAGGAAAAATTACCTATAATTAAACCT
1071337	'+'	1	1	53.57	13.33	7.27	2	Cj1137c	putative glycosyltransferase	NA	996	0	0	0	1	1	0	0	1		TTTAAAAAAGATCCTTTGAATTTAAAGGAAAAATTACCTATAATTAAACCT
1077866	'+'	1	1	23.28	13.6	2.31	1	Cj1143	bifunctional beta-1%2C4-N-acetylgalactosaminyltransferase%2FCMP-Neu5Ac synthase	NA	1611	0	0	1	0	1	0	0	0		AAAGTATGTTACCTGCCATACAAAGAGGTGTTATAGGATATAATGATTGTA
1077155	'-'	1	1	5.17	3	24.87	1	Cj1142	putative UDP-N-acetylglucosamine 2-epimerase	NA	1116	0	0	0	1	1	0	0	1		AATTCAAATCCTAAATCATTATTTGGATAAATAACTATATAATTTTTTTCA
1075026	'-'	1	1	5.54	>100	>100	1	Cj1140	alpha-2%2C3 sialyltransferase	NA	885	0	0	0	1	1	0	0	1		ATTATTTGTATCTTGATAAAAATCAATACCACTTATATATATACTTTTATA
1074894	'+'	1	1	242.45	>100	6.49	1	Cj1140	alpha-2%2C3 sialyltransferase	NA	885	0	0	1	0	1	0	0	0		AATACATAGATGGATTTCAATTTGTTGATAATTTTGAATTATACTTTAGTG
1074566	'+'	1	1	169.64	2.55	4.35	2	Cj1140	alpha-2%2C3 sialyltransferase	19	885	1	0	0	0	1	0	0	1		GGAAATTTGACTCATTTTAGCTCTTTATTTTTTTTTGATATAATTATACTA
1074566	'+'	1	1	169.64	2.55	4.35	2	Cj1139c	beta-1%2C3 galactosyltransferase	NA	912	0	0	0	1	1	0	0	1		GGAAATTTGACTCATTTTAGCTCTTTATTTTTTTTTGATATAATTATACTA
1073884	'+'	1	1	8.13	2.29	5.39	1	Cj1139c	beta-1%2C3 galactosyltransferase	NA	912	0	0	0	1	1	0	0	1		GAATATTAGCTTCTAAAGAATTAATATTATTTGTTATAGAATTGCTATTTA
1073679	'-'	1	1	8.87	4	7.74	2	Cj1139c	beta-1%2C3 galactosyltransferase	NA	912	0	0	1	0	1	0	0	1		GAACAAAATTTTAATAAAAGAAATATAAATCTTATTTATTATAAAATAAAT
1073679	'-'	1	1	8.87	4	7.74	2	Cj1138	putative glycosyltransferase	NA	1170	0	0	0	1	1	0	0	1		GAACAAAATTTTAATAAAAGAAATATAAATCTTATTTATTATAAAATAAAT
1073624	'-'	1	1	19.96	2.29	10.68	2	Cj1139c	beta-1%2C3 galactosyltransferase	NA	912	0	0	1	0	1	0	0	1		TATATCAAAAATATCAATTCAAATGGAAAAAATTTTTATATAATTTAATTC
1073624	'-'	1	1	19.96	2.29	10.68	2	Cj1138	putative glycosyltransferase	NA	1170	0	0	0	1	1	0	0	1		TATATCAAAAATATCAATTCAAATGGAAAAAATTTTTATATAATTTAATTC
1072864	'-'	1	1	6.65	>100	10.21	1	Cj1138	putative glycosyltransferase	NA	1170	0	0	0	1	1	0	0	1		AGTTTAATTCCCAATAATCATCAGAATCTAAAAAGATGATATAATCTATAA
1072064	'+'	1	1	22.3	6.54	7.83	1	Cj1137c	putative glycosyltransferase	NA	996	0	0	0	1	1	0	0	1		TTCTATAACAAATGGTGGAAAATCAAGGTAATCTTTTATATTATCTTTATC
1072053	'+'	1	1	8.13	23	19.89	1	Cj1137c	putative glycosyltransferase	NA	996	0	0	0	1	1	0	0	1		TTTTCTAATTTTTCTATAACAAATGGTGGAAAATCAAGGTAATCTTTTATA
1078622	'-'	1	1	4.07	2.37	3.94	1	Cj1143	bifunctional beta-1%2C4-N-acetylgalactosaminyltransferase%2FCMP-Neu5Ac synthase	NA	1611	0	0	0	1	1	0	0	1		AATTTTATCTACATACTTTGAATTTTTTGCTGCATTGATAGTATAATACAA
1080162	'-'	1	1	672.29	46.6	9.38	2	Cj1145c	hypothetical protein	121	847	1	0	0	0	1	0	0	0		ATGGAAGATATGAAAACAAAAATAAAGAAATTTTATGGCAGAATTATCAAG
1080162	'-'	1	1	672.29	46.6	9.38	2	Cj1146c	putative glucosyltransferase	NA	825	0	0	1	0	1	0	0	0		ATGGAAGATATGAAAACAAAAATAAAGAAATTTTATGGCAGAATTATCAAG
1080877	'+'	1	1	26.61	19.5	6.97	2	Cj1148	heptosyltransferase II	31	960	1	0	0	0	1	0	0	1		ATTATGATAGAAAGTTGTGGCATATTTTTCCTAAATTTTGTTAAAATAATA
1080877	'+'	1	1	26.61	19.5	6.97	2	Cj1146c	putative glucosyltransferase	NA	825	0	0	0	1	1	0	0	1		ATTATGATAGAAAGTTGTGGCATATTTTTCCTAAATTTTGTTAAAATAATA
1080879	'-'	1	1	53.96	14.75	9.96	2	Cj1146c	putative glucosyltransferase	30	825	1	0	0	0	1	0	0	1		GAAGATGTATAAAAATTTTCATAAATTTCCTAAACTTTGATAGAATTGTTT
1080879	'-'	1	1	53.96	14.75	9.96	2	Cj1148	heptosyltransferase II	NA	960	0	0	0	1	1	0	0	1		GAAGATGTATAAAAATTTTCATAAATTTCCTAAACTTTGATAGAATTGTTT
1081253	'-'	1	1	6.28	18	>100	1	Cj1148	heptosyltransferase II	NA	960	0	0	0	1	1	0	0	1		GTCCTTAAAATGAGCTTTTATACTAAGTGAATTTTCTATAAAATAAAGGTA
1081504	'-'	1	1	4.03	7.5	3.11	1	Cj1148	heptosyltransferase II	NA	960	0	0	0	1	1	0	0	1		AGATTTTTTACTTTTATGTTTTGTTCTTTTAAAATTTGATAAATTTCATTA
1082281	'-'	1	0	6.65	3	0.88	1	Cj1149c	phosphoheptose isomerase	NA	561	0	0	1	0	1	0	0	0		CGCTAAAGTAGGTGAGCTTTTGTGTGAGTGTCTTAAAAAAGGTGGTAAAAT
1084990	'-'	1	0	25.87	4.04	1.76	2	Cj1151c	ADP-glyceromanno-heptose 6-epimerase	254	954	1	0	0	0	1	0	0	0		TATGCTTAAAGAATTTGCTAAACAAGATATAAAAATTGATAAAATTTATCA
1084990	'-'	1	0	25.87	4.04	1.76	2	Cj1152c	D%2CD-heptose 1%2C7-bisphosphate phosphatase	NA	561	0	0	1	0	1	0	0	0		TATGCTTAAAGAATTTGCTAAACAAGATATAAAAATTGATAAAATTTATCA
1085255	'-'	1	1	1710.11	>100	8.62	1	Cj1152c	D%2CD-heptose 1%2C7-bisphosphate phosphatase	NA	561	0	0	1	0	1	0	0	0		TAAAGATAATGTTTATTTTCTTTTTAAAAAAGCTATATTATAATGTTTTTA
1085349	'+'	1	1	2346.92	>100	2.58	2	Cj1153	putative periplasmic cytochrome C	30	303	1	0	0	0	1	0	0	1		ATCTTTAATTTCTTAAGATTTTTATTAAAAATAAAGATATATAATACCTAG
1085349	'+'	1	1	2346.92	>100	2.58	2	Cj1152c	D%2CD-heptose 1%2C7-bisphosphate phosphatase	NA	561	0	0	0	1	1	0	0	1		ATCTTTAATTTCTTAAGATTTTTATTAAAAATAAAGATATATAATACCTAG
1085890	'-'	1	1	89.81	5.67	6.1	1	Cj1154c	putative cytochrome oxidase maturation protein cbb3-type	NA	207	0	0	1	0	1	0	0	0		AGTCGTTTTAAATGCTTTAAGGATTAAAGAATGAATAGTATAATCATGATG
1087977	'+'	1	1	6.65	13	21.55	1	Cj1155c	putative cation-transporting ATPase	NA	2358	0	0	0	1	1	0	0	1		TGATTAATATCAAGTTCTAAAATTCCTTCTTGTTTGGTTAAAATTTTCTCA
1088295	'+'	1	0	26.24	3.84	1.88	2	Cj1156	transcription termination factor Rho	78	1299	0	1	0	0	1	0	0	1		TGTTCACATTTCATAATCATTCTTTAAAAAAATATTTTTTATAATTATAAA
1088295	'+'	1	0	26.24	3.84	1.88	2	Cj1155c	putative cation-transporting ATPase	NA	2358	0	0	0	1	1	0	0	1		TGTTCACATTTCATAATCATTCTTTAAAAAAATATTTTTTATAATTATAAA
1088330	'-'	1	1	1.85	6	9.95	2	Cj1155c	putative cation-transporting ATPase	66	2358	1	0	0	0	1	0	0	1		TTTTCCATAAGTCCTCGTAAGATTTAGCAGAATAATTTTTGTAAAATGTGA
1088330	'-'	1	1	1.85	6	9.95	2	Cj1156	transcription termination factor Rho	NA	1299	0	0	0	1	1	0	0	1		TTTTCCATAAGTCCTCGTAAGATTTAGCAGAATAATTTTTGTAAAATGTGA
1088335	'+'	1	1	334.48	6.08	4.85	2	Cj1156	transcription termination factor Rho	38	1299	1	0	0	0	1	0	0	1		ATAATTATAAACAAATTTGACAAAAAGTGCATTTTTTTATTAAAATCACAT
1088335	'+'	1	1	334.48	6.08	4.85	2	Cj1155c	putative cation-transporting ATPase	NA	2358	0	0	0	1	1	0	0	1		ATAATTATAAACAAATTTGACAAAAAGTGCATTTTTTTATTAAAATCACAT
1090211	'-'	1	1	8.87	3.67	3.52	1	Cj1157	DNA polymerase III subunits gamma and tau	NA	1530	0	0	0	1	1	0	0	1		TTAACATTTTCTTTAAGTAAAATTTCTTTAAGATGATTTAAAATTTCACTC
1090820	'-'	1	1	6.65	10	>100	1	Cj1157	DNA polymerase III subunits gamma and tau	NA	1530	0	0	0	1	1	0	0	1		GTACTTTGTTTAAAGCATTCTGCAAGATCAAAATCCCTATCATAAATACTA
1091751	'-'	1	1	153.75	14.12	6.02	1	Cj1160c	hypothetical protein	28	180	1	0	0	0	1	0	0	0		AATTTAAAAATTTAATTTTTATTAATAATATATTATATATAATTAATATTA
1095088	'+'	1	1	9.98	>100	4.14	1	Cj1163c	putative cation transport protein	NA	951	0	0	0	1	1	0	0	1		TTTTTTGCTTGACATTTTAAGATATTAAGCTAAAAAGGATATAAATATTTG
1095088	'+'	1	1	9.98	>100	4.14	1	Cj1164c	hypothetical protein	NA	264	0	0	0	1	1	0	0	1		TTTTTTGCTTGACATTTTAAGATATTAAGCTAAAAAGGATATAAATATTTG
1095230	'+'	1	1	7.12	3.56	4.42	1	Cj1164c	hypothetical protein	NA	264	0	0	0	1	1	0	0	1		GAGTCATTATATCTTGACTCTTGTCTTGGAGCTTGGTTAAAATTTGCTGTA
1095393	'-'	1	1	45.46	42	4.08	1	Cj1164c	hypothetical protein	26	264	1	0	0	0	1	0	0	0		ACATTAAAACTTGTTGTAAATTTGTTTAATATTTCTTTTTATAATTTTAAG
1096998	'+'	1	1	9.61	>100	3.68	1	Cj1167	L-lactate dehydrogenase	NA	927	0	0	1	0	1	0	0	0		TTTCATGTGCCAAATTTAGAAAATTTAGCTTCTTGCGATATTATCATTTTA
1098322	'-'	1	1	10.53	2.62	4.34	1	Cj1168c	putative integral membrane protein	26	603	1	0	0	0	1	0	0	0		AGCGGTGTAAAACCGCTTTTTACTGTTTAATCTTTTAAGCTACAATTTTTT
1098619	'-'	1	1	25.87	2.43	5.4	2	Cj1169c	putative periplasmic protein	15	228	1	0	0	0	1	0	0	0		AAAAGATAAAGCAAGAGCTGATAATATCATGTTAATGTATAATGTAAAATT
1098619	'-'	1	1	25.87	2.43	5.4	2	Cj1170c	50 kda outer membrane protein precursor	NA	1422	0	0	1	0	1	0	0	0		AAAAGATAAAGCAAGAGCTGATAATATCATGTTAATGTATAATGTAAAATT
1100081	'-'	1	1	37.33	2.13	10.78	1	Cj1170c	50 kda outer membrane protein precursor	45	1422	1	0	0	0	1	0	0	0		AAAAATGATTAATGTATAATTTTTTTTTAAACTTTTTTTTCTATAATCACA
1101240	'+'	1	1	3.7	6	4.42	2	Cj1173	putative multidrug resistance protein	260	342	0	1	0	0	1	0	0	1		TAGCCGCATCTATATTATCTTTTGGCATATTATTTGCTTTTGCTGTGGCTA
1101240	'+'	1	1	3.7	6	4.42	2	Cj1172c	hypothetical protein	NA	708	0	0	0	1	1	0	0	1		TAGCCGCATCTATATTATCTTTTGGCATATTATTTGCTTTTGCTGTGGCTA
1101422	'-'	1	1	114.94	5.55	8.09	2	Cj1172c	hypothetical protein	31	708	1	0	0	0	1	0	0	1		AAATCATACCATTTAAAGCTTTAATTAGCCTTTTTAGTTTATACTTTTAAG
1101422	'-'	1	1	114.94	5.55	8.09	2	Cj1173	putative multidrug resistance protein	NA	342	0	0	0	1	1	0	0	1		AAATCATACCATTTAAAGCTTTAATTAGCCTTTTTAGTTTATACTTTTAAG
1101444	'+'	1	1	2.59	>100	>100	2	Cj1173	putative multidrug resistance protein	56	342	0	1	0	0	1	0	0	1		ATTCTCACTTTCTTTAAAGATTTTTAAACTTAAAAGTATAAACTAAAAAGG
1101444	'+'	1	1	2.59	>100	>100	2	Cj1172c	hypothetical protein	NA	708	0	0	0	1	1	0	0	1		ATTCTCACTTTCTTTAAAGATTTTTAAACTTAAAAGTATAAACTAAAAAGG
1101462	'-'	1	1	9.24	4.67	8.85	2	Cj1172c	hypothetical protein	71	708	0	1	0	0	1	0	0	1		TTGCGATATTCAAAAAGCTTCTCCCCGAAAATAAATGGTAAAATCATACCA
1101462	'-'	1	1	9.24	4.67	8.85	2	Cj1173	putative multidrug resistance protein	NA	342	0	0	0	1	1	0	0	1		TTGCGATATTCAAAAAGCTTCTCCCCGAAAATAAATGGTAAAATCATACCA
1101477	'+'	1	1	293.46	47.71	8.6	2	Cj1173	putative multidrug resistance protein	23	342	0	1	0	0	1	0	0	1		AAGTATAAACTAAAAAGGCTAATTAAAGCTTTAAATGGTATGATTTTACCA
1101477	'+'	1	1	293.46	47.71	8.6	2	Cj1172c	hypothetical protein	NA	708	0	0	0	1	1	0	0	1		AAGTATAAACTAAAAAGGCTAATTAAAGCTTTAAATGGTATGATTTTACCA
1102119	'+'	1	1	7.02	20	4.54	2	Cj1174	putative multidrug resistance protein	NA	309	0	0	1	0	1	0	0	1		TTATATAAAGAAAAATTAAACAAAATAGGAATTTTAGGTATCATTATCGTG
1102119	'+'	1	1	7.02	20	4.54	2	Cj1175c	arginyl-tRNA synthetase	NA	1593	0	0	0	1	1	0	0	1		TTATATAAAGAAAAATTAAACAAAATAGGAATTTTAGGTATCATTATCGTG
1104199	'-'	1	1	1479.11	75.11	5.57	2	Cj1176c	Sec-independent protein translocase	189	240	1	0	0	0	1	0	0	0		AGATGAGTTAAAAAAAAGACTTATTAAGCGAAATACTGATACAATAATACA
1104199	'-'	1	1	1479.11	75.11	5.57	2	Cj1177c	guanylate kinase	NA	624	0	0	1	0	1	0	0	0		AGATGAGTTAAAAAAAAGACTTATTAAGCGAAATACTGATACAATAATACA
1106283	'-'	1	1	1445.85	32.3	4.45	1	Cj1178c	highly acidic protein	23	1629	1	0	0	0	1	0	0	0		CTCTTTTTTTCTTCTAAGGAAAGGATAAATGAAATTATCGTAAAATAGCGA
1106308	'+'	1	1	4.44	>100	21.55	1	Cj1178c	highly acidic protein	NA	1629	0	0	0	1	1	0	0	1		CATCACTTTAATCCTTAAAAAATAATCGCTATTTTACGATAATTTCATTTA
1106308	'+'	1	1	4.44	>100	21.55	1	Cj1179c	flagellar biosynthesis protein FliR	NA	768	0	0	0	1	1	0	0	1		CATCACTTTAATCCTTAAAAAATAATCGCTATTTTACGATAATTTCATTTA
1109424	'-'	1	1	36.59	12	3.06	1	Cj1182c	30S ribosomal protein S2	NA	792	0	0	1	0	1	0	0	0		ATGTAATTGATTTACAAAAAACTTTAAGATATTTTAGATATACCTATAATA
1109667	'-'	1	1	3790.54	78.97	8.12	1	Cj1182c	30S ribosomal protein S2	84	792	1	0	0	0	1	0	0	0		GGACTACATATATAAGTAAAAACTAAACTTAAATTTGATAAAATCTTAGCT
1109672	'-'	1	1	8.98	>100	12.43	1	Cj1182c	30S ribosomal protein S2	89	792	0	1	0	0	1	0	0	0		ACCAAGGACTACATATATAAGTAAAAACTAAACTTAAATTTGATAAAATCT
1110894	'-'	1	1	20.7	7.2	3.62	1	Cj1183c	cyclopropane-fatty-acyl-phospholipid synthase	32	1164	0	1	0	0	1	0	0	0		TTTTTTCTTCATTTTTATTAATTTTTAATATTTAAAGAGAGATACTCCAAA
1111049	'-'	1	0	13.63	1.67	1.2	2	Cj1183c	cyclopropane-fatty-acyl-phospholipid synthase	187	1164	1	0	0	0	1	0	0	0		GCAAAAAAGAAGAAAGAAAAACTACAGGAATTTATGTAATGATATTCTTTG
1111049	'-'	1	0	13.63	1.67	1.2	2	Cj1184c	putative ubiquinol-cytochrome C reductase cytochrome C subunit	NA	1125	0	0	1	0	1	0	0	0		GCAAAAAAGAAGAAAGAAAAACTACAGGAATTTATGTAATGATATTCTTTG
1111420	'-'	1	0	25.5	3.95	1.46	1	Cj1184c	putative ubiquinol-cytochrome C reductase cytochrome C subunit	NA	1125	0	0	1	0	1	0	0	0		AGATGCTACTATTAAGAAAGATGTTGAGGCAAAATATGCTAAAATGGAAAA
1112753	'+'	1	1	9.98	>100	6.91	1	Cj1185c	putative ubiquinol-cytochrome C reductase cytochrome B subunit	NA	1251	0	0	0	1	1	0	0	1		TTAACATGTGGGATTCTTAAAGAATAGAAGTGAAATGCTATAATAGCAATG
1113898	'-'	1	1	7.76	>100	5.22	1	Cj1186c	putative ubiquinol-cytochrome C reductase iron-sulfur subunit	32	504	1	0	0	0	1	0	0	0		AACTTGTTAAACAAAGAAAAAATTTATTTTAATTTCGATAAACTTTTAACT
1113927	'+'	1	1	3.33	>100	5.11	1	Cj1186c	putative ubiquinol-cytochrome C reductase iron-sulfur subunit	NA	504	0	0	0	1	1	0	0	1		TTCGATTTTATTTTTTAACCAAGTTAAAAGTTTATCGAAATTAAAATAAAT
1113927	'+'	1	1	3.33	>100	5.11	1	Cj1187c	arsenical pump membrane protein	NA	1287	0	0	0	1	1	0	0	1		TTCGATTTTATTTTTTAACCAAGTTAAAAGTTTATCGAAATTAAAATAAAT
1114719	'+'	1	1	8.5	>100	5.22	1	Cj1187c	arsenical pump membrane protein	NA	1287	0	0	0	1	1	0	0	1		GCAAAAACATATTTTTAGCAAATTCTAAAAATTCTATCTTAAAATAATTTG
1114866	'+'	1	1	3.41	6.5	5.39	1	Cj1187c	arsenical pump membrane protein	NA	1287	0	0	0	1	1	0	0	1		CATGATTTTTACAATCTTTAAGAGTTGAAAATAAAGCTATAATAATAGGTG
1115470	'-'	1	1	32.89	18.8	3.55	2	Cj1187c	arsenical pump membrane protein	228	1287	1	0	0	0	1	0	0	0		ATCATTACTCCTTAAGAGAGATTTTAAATGAGGCAAAGTATTATCATTACA
1115470	'-'	1	1	32.89	18.8	3.55	2	Cj1188c	tRNA uridine 5-carboxymethylaminomethyl modification enzyme GidA	NA	1860	0	0	1	0	1	0	0	0		ATCATTACTCCTTAAGAGAGATTTTAAATGAGGCAAAGTATTATCATTACA
1115777	'-'	1	0	7.39	2.75	1.28	1	Cj1188c	tRNA uridine 5-carboxymethylaminomethyl modification enzyme GidA	NA	1860	0	0	1	0	1	0	0	0		AGAGCGGAATTTAGACTGCTTTTAAGGGAAGAAAATGCTATACTTAGACTT
1117137	'-'	1	1	344.83	6.91	6.55	1	Cj1188c	tRNA uridine 5-carboxymethylaminomethyl modification enzyme GidA	35	1860	1	0	0	0	1	0	0	0		TTTTGTTAGACTTAAAACGAGTTTGTTTTAAGTCTAAATATTATATAATCT
1117368	'-'	1	1	135.27	6.15	4.27	2	Cj1188c	tRNA uridine 5-carboxymethylaminomethyl modification enzyme GidA	266	1860	0	1	0	0	1	0	0	0		AAATGTAACCCCATCAATAGATGTTAATAATAATATCATAGGCTATTATTC
1117368	'-'	1	1	135.27	6.15	4.27	2	Cj1189c	bipartate energy taxis response protein CetB	NA	498	0	0	1	0	1	0	0	0		AAATGTAACCCCATCAATAGATGTTAATAATAATATCATAGGCTATTATTC
1119165	'-'	1	1	99.79	2.52	4.06	1	Cj1190c	bipartate energy taxis response protein CetA	81	1380	1	0	0	0	1	0	0	0		AAAATAATTAAATAAGATATATTTAATCTTTTTTATTGTATAATTTTCACC
1119344	'+'	1	1	27.35	3.47	9.33	1	Cj1191c	putative PAS domain containing signal-transduction sensor protein	NA	495	0	0	0	1	1	0	0	1		TAATGCCCGATTTTTGCTCTTTTTCAAGTAAAATTTTATAAACTTCTTCAA
1119738	'-'	1	1	195.51	6.34	7.65	1	Cj1191c	putative PAS domain containing signal-transduction sensor protein	39	495	1	0	0	0	1	0	0	0		TAATTTTGTAATTCAGTTTGCTTTTTGTTATTTATTATTGGTAATAATTCT
1119919	'+'	1	1	1030.06	2.53	3.35	1	Cj1192	putative C4-dicarboxylate transport protein	49	1377	0	1	0	0	1	0	0	0		CATATAAAAGAAAGTATTTCTAGATTTGTTTTTTTGTTAAAATTTACGATA
1120925	'-'	1	1	2.59	1.87	5.67	1	Cj1192	putative C4-dicarboxylate transport protein	NA	1377	0	0	0	1	1	0	0	1		TGCTAGAAAGATTAAGCTCATAGCTAGATAAATATTTGTACAATCAAGATT
1122179	'-'	1	1	158.93	25	6.32	1	Cj1193c	putative periplasmic protein	32	807	1	0	0	0	1	0	0	0		TTTTAGTCTTTGTGGAATTTTTATTTATATTATTTTTTTATAATAAATACT
1123332	'+'	1	1	29.2	80	2.16	1	Cj1194	putative phosphate permease	NA	1527	0	0	1	0	1	0	0	0		AAAATCGTTAAAAAAACAGAACTTAATAAAACTACTGATAGAATTTTCTCA
1123470	'+'	1	1	67.82	4.42	6.09	1	Cj1194	putative phosphate permease	NA	1527	0	0	1	0	1	0	0	0		TTAGATGTCTTAAAAAACGGTACAATTAACGCGACTTCTCCTGTACCTTTT
1123680	'-'	1	1	5.91	9	2.26	1	Cj1194	putative phosphate permease	NA	1527	0	0	0	1	1	0	0	1		CCTATAGGCTTCATCATAATCCAATTTGCGTTTTTATTATACACTCCTATA
1123702	'+'	1	0	14.41	6.57	1.62	1	Cj1194	putative phosphate permease	NA	1527	0	0	1	0	1	0	0	0		CCCATATACTCATAGGTGCTATATTGGGTATAGGAGTGTATAATAAAAACG
1124397	'+'	1	1	1.55	>100	>100	1	Cj1195c	dihydroorotase	NA	1179	0	0	0	1	1	0	0	1		CTTTCAAACTTAAAAGATCAAAAATAACTTTATTTTTATAAAATTTAGCCA
1127345	'-'	1	1	3409.87	20.7	6.99	2	Cj1197c	aspartyl%2Fglutamyl-tRNA amidotransferase subunit B	23	1419	1	0	0	0	1	0	0	1		TAAAGTTAATATTTAAAGCCTTTCTAAAAGAAAAAAAGATAAAATAAAACA
1127345	'-'	1	1	3409.87	20.7	6.99	2	Cj1198	S-ribosylhomocysteinase	NA	495	0	0	0	1	1	0	0	1		TAAAGTTAATATTTAAAGCCTTTCTAAAAGAAAAAAAGATAAAATAAAACA
1127413	'+'	1	1	1023.77	5.59	3.02	2	Cj1198	S-ribosylhomocysteinase	24	495	1	0	0	0	1	0	0	1		TTTCTTTTAGAAAGGCTTTAAATATTAACTTTAAATGCTATAATTCTTAGA
1127413	'+'	1	1	1023.77	5.59	3.02	2	Cj1197c	aspartyl%2Fglutamyl-tRNA amidotransferase subunit B	NA	1419	0	0	0	1	1	0	0	1		TTTCTTTTAGAAAGGCTTTAAATATTAACTTTAAATGCTATAATTCTTAGA
1127994	'+'	1	1	44.72	31.25	3.83	2	CjNC15	CjNC15	0	137	1	0	0	0	1	0	0	1		TTTTTTAAATGATTAAGCTTTAATTAATATATTTTTATATATGATTTTGAA
1127994	'+'	1	1	44.72	31.25	3.83	2	CjNC18	CjNC18	NA	136	0	0	0	1	1	0	0	1		TTTTTTAAATGATTAAGCTTTAATTAATATATTTTTATATATGATTTTGAA
1128772	'+'	1	1	5.54	>100	16.58	1	Cj1199	putative iron%2Fascorbate-dependent oxidoreductase	NA	993	0	0	1	0	1	0	0	0		TTTTGATAAACTTTATGGAGAAAATTCTTACGAACATTGTAAAATCATACA
1132203	'+'	1	1	10.84	>100	62.99	2	Cj1202	5%2C10-methylenetetrahydrofolate reductase	99	849	1	0	0	0	1	0	0	0		AAAAAATTTTAAACAAATTACCTAAGGAGCAAATTTGGATCAATCCAGACT
1132203	'+'	1	1	10.84	>100	62.99	2	Cj1201	5-methyltetrahydropteroyltriglutamate--homocysteine S-methyltransferase	NA	2265	0	0	1	0	1	0	0	0		AAAAAATTTTAAACAAATTACCTAAGGAGCAAATTTGGATCAATCCAGACT
1133275	'-'	1	1	7.74	1.79	6.37	1	Cj1203c	putative integral membrane protein	NA	192	0	0	1	0	1	0	0	0		AGCTTTAATGCTTTTTGGTGCACTTTTCTTCTTTTTTAAATATAATTCTTT
1134067	'-'	1	1	398.79	12.86	12.41	1	Cj1204c	F0F1 ATP synthase subunit A	27	681	1	0	0	0	1	0	0	0		TGGATGTAAATTTTCATTAAAATATAAGTAAGATTTTGCTAAAATTTCGAG
1134964	'+'	1	1	13.67	19.5	5.53	1	Cj1205c	DNA repair protein RadA	NA	1341	0	0	0	1	1	0	0	1		GAATATAGAGTTTGTATAGAATCAACGATAAGAATGCTATAATCTTTTTTG
1135671	'+'	1	1	7.02	>100	10.78	1	Cj1206c	putative signal recognition particle protein	NA	867	0	0	0	1	1	0	0	1		CCATCAAGTTTTACAAGCTCATTAAAAGCTTTAGCTTGTAAAATTCCAGCA
1136906	'-'	1	1	2193.17	57.51	6.93	2	Cj1207c	putative lipoprotein thiredoxin	34	558	1	0	0	0	1	0	0	1		ATTAATATGCCTTTAAAAAAATATTATCTTATGTATGTTATAATTTTAGCA
1136906	'-'	1	1	2193.17	57.51	6.93	2	Cj1208	putative 5-formyltetrahydrofolate cyclo-ligase family protein	NA	627	0	0	0	1	1	0	0	1		ATTAATATGCCTTTAAAAAAATATTATCTTATGTATGTTATAATTTTAGCA
1136914	'-'	1	1	4.44	>100	14.75	2	Cj1207c	putative lipoprotein thiredoxin	42	558	0	1	0	0	1	0	0	1		TTTTTTCCATTAATATGCCTTTAAAAAAATATTATCTTATGTATGTTATAA
1136914	'-'	1	1	4.44	>100	14.75	2	Cj1208	putative 5-formyltetrahydrofolate cyclo-ligase family protein	NA	627	0	0	0	1	1	0	0	1		TTTTTTCCATTAATATGCCTTTAAAAAAATATTATCTTATGTATGTTATAA
1136921	'+'	1	1	127.88	28.6	5.43	2	Cj1208	putative 5-formyltetrahydrofolate cyclo-ligase family protein	34	627	1	0	0	0	1	0	0	1		ATTATTTATCAATCCTTTATTATTCTTTATAAAAATGCTAAAATTATAACA
1136921	'+'	1	1	127.88	28.6	5.43	2	Cj1207c	putative lipoprotein thiredoxin	NA	558	0	0	0	1	1	0	0	1		ATTATTTATCAATCCTTTATTATTCTTTATAAAAATGCTAAAATTATAACA
1137210	'+'	1	1	123.44	9.79	6.13	2	Cj1209	phosphodiesterase	292	1554	1	0	0	0	1	0	0	0		TTTTTGTTCCATTTATGCAAGATAAAAGTTTAAAAATTGTAAAATTAAGAT
1137210	'+'	1	1	123.44	9.79	6.13	2	Cj1208	putative 5-formyltetrahydrofolate cyclo-ligase family protein	NA	627	0	0	1	0	1	0	0	0		TTTTTGTTCCATTTATGCAAGATAAAAGTTTAAAAATTGTAAAATTAAGAT
1137517	'+'	1	1	13.67	8.4	2.13	1	Cj1208	putative 5-formyltetrahydrofolate cyclo-ligase family protein	NA	627	0	0	1	0	1	0	0	0		CCCTTATAAAAAATATTACAAGAAAGAAAGAAAAAATGATAGAATCACTTA
1137517	'+'	1	1	13.67	8.4	2.13	1	Cj1209	phosphodiesterase	NA	1554	0	0	1	0	1	0	0	0		CCCTTATAAAAAATATTACAAGAAAGAAAGAAAAAATGATAGAATCACTTA
1138333	'+'	1	1	31.05	2.71	5.11	1	Cj1209	phosphodiesterase	NA	1554	0	0	1	0	1	0	0	0		CTATTGCTACAAAAGTTATAGAACTTTTAGTTGAAGATGGCAGAATTCAAC
1139111	'+'	1	1	10.72	2.32	3.13	1	Cj1210	putative integral membrane protein	NA	558	0	0	1	0	1	0	0	0		ATTATGCAAGATATGATTGATACTTTAATAAAATATGGTTATATTGTTTTA
1139998	'-'	1	1	191.91	33.45	8.1	1	Cj1211	putative competence family protein	NA	1260	0	0	0	1	1	0	0	1		TTTTCATTTGTATGTTGATTTAAGAAGTAAGATATAATGGGATTGTATTCT
1140004	'-'	1	1	5.54	>100	>100	1	Cj1211	putative competence family protein	NA	1260	0	0	0	1	1	0	0	1		TTAATCTTTTCATTTGTATGTTGATTTAAGAAGTAAGATATAATGGGATTG
1140014	'+'	1	1	4.44	>100	3.97	1	Cj1211	putative competence family protein	NA	1260	0	0	1	0	1	0	0	0		CACCTTCTTATGATTTTGAAAAATTAAAAGAAAAAGAATACAATCCCATTA
1140983	'-'	1	1	11.09	>100	2.13	1	Cj1212c	putative ribonuclease BN	NA	807	0	0	1	0	1	0	0	0		TGGTATATAGGAAAAAATTTATTTGTATATTACGTGGTATATAATAAAACA
1143791	'-'	1	1	211.41	>100	5.17	2	Cj1214c	putative exporting protein	47	726	1	0	0	0	1	0	0	1		ATTTTGAAATTTGAAAGCTATATTTTACTTTATTTTTCTTACAATTGCTTA
1143791	'-'	1	1	211.41	>100	5.17	2	Cj1215	putative peptidase M23 family protein	NA	1161	0	0	0	1	1	0	0	1		ATTTTGAAATTTGAAAGCTATATTTTACTTTATTTTTCTTACAATTGCTTA
1143826	'+'	1	1	195.15	>100	9.3	2	Cj1215	putative peptidase M23 family protein	40	1161	1	0	0	0	1	0	0	1		ATAATCCTTTTTTGTTAAGCAATTGTAAGAAAAATAAAGTAAAATATAGCT
1143826	'+'	1	1	195.15	>100	9.3	2	Cj1214c	putative exporting protein	NA	726	0	0	0	1	1	0	0	1		ATAATCCTTTTTTGTTAAGCAATTGTAAGAAAAATAAAGTAAAATATAGCT
1144173	'-'	1	1	4.95	9	8.29	1	Cj1215	putative peptidase M23 family protein	NA	1161	0	0	0	1	1	0	0	1		TTTTAATGGTTAAATGTAAAATTCTATCTTCTTTTTGATAAGATACAGGAG
1145604	'+'	1	1	1.48	>100	4.54	1	Cj1217c	hypothetical protein	NA	681	0	0	0	1	1	0	0	1		TATTTTCAAAGCTTCCTTTTCTACCTGAATGCAAAGCTGCTATAATACCAC
1147227	'-'	1	1	5.17	15	2.43	1	Cj1219c	putative periplasmic protein	NA	2541	0	0	1	0	1	0	0	0		TCTTTAGCTGATCTTACAAAACTACAAGGAAGTTTTGATATAAGCAAAATG
1147972	'-'	1	1	12.2	34	3.04	1	Cj1219c	putative periplasmic protein	NA	2541	0	0	1	0	1	0	0	0		TGCAGGATACGGAGCTTTGGTTTCTGGAAATTTAAATGCTAAACTTTTAAA
1148326	'+'	1	1	2.59	8	9.08	1	Cj1219c	putative periplasmic protein	NA	2541	0	0	0	1	1	0	0	1		AAAGAGTTTTTTGGGTTTGTAAGTTAAGATAATCATTGTAAATTTTACTTA
1148544	'+'	1	1	51.74	>100	13.55	1	Cj1219c	putative periplasmic protein	NA	2541	0	0	0	1	1	0	0	1		TTTGCTTGAGCATTTAAAAAACCTTTAGCGTAACTAGGGTAAGATAAAAGA
1149145	'+'	1	1	9414.66	73.27	9.47	1	Cj1220	co-chaperonin GroES	49	261	1	0	0	0	1	0	0	0		TTTTAATTTAAAGTATTGACAAAATTCATTTTTTATAGTATGATATTATCA
1149261	'-'	1	1	135.01	11.05	12.35	2	Cj1219c	putative periplasmic protein	229	2541	1	0	0	0	1	0	0	1		CTTCACCCATTAAAGGCTTTTCTTTAGCATTATCTGGTATAATTATGCCTG
1149261	'-'	1	1	135.01	11.05	12.35	2	Cj1220	co-chaperonin GroES	NA	261	0	0	0	1	1	0	0	1		CTTCACCCATTAAAGGCTTTTCTTTAGCATTATCTGGTATAATTATGCCTG
1151053	'+'	1	1	2611.05	18.1	3.48	1	Cj1221	chaperonin GroEL	NA	1638	0	0	1	0	1	0	0	0		GTATGCTTTTAACCACAGAAGCAACAATTAGTGAAATTAAAGAAGATAAAC
1153039	'-'	1	1	878.89	7.19	10.34	1	Cj1223c	two-component regulator	36	666	1	0	0	0	1	0	0	0		AAAAATGAAATTTTATTAAATAATTGATAAGAATTTTGATACAATGATATA
1153120	'+'	1	1	907.35	46.46	7.74	1	Cj1224	putative iron-binding protein	31	600	1	0	0	0	1	0	0	0		TTTAATAAAATTTCATTTTTATTTAATTTATTTTTATCTATAATCCTTTCA
1153723	'-'	1	1	2.96	>100	5.8	1	Cj1224	putative iron-binding protein	NA	600	0	0	0	1	1	0	0	1		CATTGCGTTTCATTTTATCCTCCTTAAGAATATTTTTTGTAAAATTTTATA
1153723	'-'	1	1	2.96	>100	5.8	1	Cj1225	hypothetical protein	NA	249	0	0	0	1	1	0	0	1		CATTGCGTTTCATTTTATCCTCCTTAAGAATATTTTTTGTAAAATTTTATA
1154072	'+'	1	1	1.86	>100	11.6	1	Cjp22	tRNA-Asn	NA	75	0	0	0	1	1	0	0	1		CAATTTTTTTGTGATAAAGACTTATTAATTTTTTATATTAAAATACATTTA
1154191	'-'	1	1	574.11	32.68	8.87	1	Cjp22	tRNA-Asn	17	75	1	0	0	0	1	0	0	0		ATTTTTGTGAAAAAACCCTTGACAAAGTTTTTTAATTTCACTATAATCATA
1156207	'-'	1	0	94.99	14.64	1.41	1	Cj1227c	putative two-component regulator	22	675	1	0	0	0	1	0	0	0		TAACGGAAGGATTTTCCTTTCGTTATAAATTTTAGTTTAAAATTAAAATTA
1157731	'-'	1	1	596.52	9.54	7.05	1	Cj1228c	serine protease	52	1419	1	0	0	0	1	0	0	0		CTCAAGGTTTTATTTACAATTTTGTAAATTTTCGGTTTTATACTATGAAGA
1157840	'+'	1	1	836.21	34.61	7.01	1	Cj1229	putative curved-DNA binding protein	39	894	1	0	0	0	1	0	0	0		ATTTATAAAACTTGATTGACTTAGGCTAAAGTTTATGTTATAATTTAATCC
1159356	'+'	1	1	15.89	22.5	2.23	1	Cj1231	putative glutathione-regulated potassium-efflux system protein	NA	1626	0	0	1	0	1	0	0	0		AGTGGCAAAGGCGAAATCACTCATATAGCCGAATTTGGTATAGTGTTTTTA
1159589	'+'	1	1	6.81	4.75	2.24	1	Cj1231	putative glutathione-regulated potassium-efflux system protein	NA	1626	0	0	1	0	1	0	0	0		AACCGCAGTGGTGCTTAAAATTTTAAATGATAATGGCGATATAAATGAGCA
1161668	'-'	1	1	3.7	10	16.58	1	Cj1233	putative HAD-superfamily hydrolase	NA	621	0	0	0	1	1	0	0	1		CTAGCGTTGCTAAATTCATTTTCTTTTAAATTTTTTTGATACCATTTGGCA
1161785	'+'	1	1	320.81	1.95	4.95	1	Cj1234	glycyl-tRNA synthetase subunit beta	23	1995	1	0	0	0	1	0	0	0		TTGCAAAAGTATTTATAAGTTTTTTAATGAAATTTTAGTTAAAATTAGAAA
1163283	'-'	1	1	8.87	6.5	21.55	1	Cj1234	glycyl-tRNA synthetase subunit beta	NA	1995	0	0	0	1	1	0	0	1		ATATCAAAGCTTTTATAATGATTTGAAAGTTTTTCTAATAAAATTTGGATA
1164075	'-'	1	1	2.17	>100	11.6	1	Cj1235	putative peptidase M23 family protein	NA	822	0	0	0	1	1	0	0	1		AAAAATCTTTTTGTTTTCAATTTGCAATTTTTCACTTTTATAATTACCTTC
1165972	'-'	1	1	8.13	2.37	4.97	1	Cj1237c	putative phosphatase	NA	975	0	0	1	0	1	0	0	0		AAATATCCTAAATTTATCATAAATATTAAAGATAAAAAACTTAAAATTCAT
1166560	'-'	1	1	8.98	>100	2.62	2	Cj1237c	putative phosphatase	22	975	1	0	0	0	1	0	0	1		TTTACACCTAAAAGCATATTTTTCCTTTAGAACTTTTTTGCTATTATACTA
1166560	'-'	1	1	8.98	>100	2.62	2	Cj1238	pyridoxine 5%27-phosphate synthase	NA	774	0	0	0	1	1	0	0	1		TTTACACCTAAAAGCATATTTTTCCTTTAGAACTTTTTTGCTATTATACTA
1166572	'+'	1	0	8.36	10	0.87	2	Cj1238	pyridoxine 5%27-phosphate synthase	22	774	1	0	0	0	1	0	0	1		AGATCTATACCTAACATGACTTTCCTTATTTGATTTTATAGTATAATAGCA
1166572	'+'	1	0	8.36	10	0.87	2	Cj1237c	putative phosphatase	NA	975	0	0	0	1	1	0	0	1		AGATCTATACCTAACATGACTTTCCTTATTTGATTTTATAGTATAATAGCA
1168172	'+'	1	1	2.48	5	2.61	1	Cj1239	4-hydroxythreonine-4-phosphate dehydrogenase	NA	1095	0	0	1	0	1	0	0	0		AGCCTTAAAAGATGAAAATTTACAAAAAGAATTGCTTTTAAATTTTAAAGG
1169114	'-'	1	1	4.03	2.86	6.63	2	Cj1240c	putative periplasmic protein	64	603	0	1	0	0	1	0	0	1		ATTTTAAGTTCCTTATAAAAAATAAAAACGCATTATAATAAAATAAAGGCT
1169114	'-'	1	1	4.03	2.86	6.63	2	Cj1241	putative MFS transport protein	NA	1200	0	0	0	1	1	0	0	1		ATTTTAAGTTCCTTATAAAAAATAAAAACGCATTATAATAAAATAAAGGCT
1169137	'+'	1	1	1.86	>100	9.08	2	Cj1241	putative MFS transport protein	26	1200	1	0	0	0	1	0	0	1		AATATTTTGAATTTTTTAAGGAAATTAAGCCTTTATTTTATTATAATGCGT
1169137	'+'	1	1	1.86	>100	9.08	2	Cj1240c	putative periplasmic protein	NA	603	0	0	0	1	1	0	0	1		AATATTTTGAATTTTTTAAGGAAATTAAGCCTTTATTTTATTATAATGCGT
1169258	'-'	1	1	1.85	5	>100	2	Cj1240c	putative periplasmic protein	208	603	1	0	0	0	1	0	0	1		AAGGTTGTAAGATAGCCCGCGGTTTTTGCATCTACGCTAAAATACGCTTCA
1169258	'-'	1	1	1.85	5	>100	2	Cj1241	putative MFS transport protein	NA	1200	0	0	0	1	1	0	0	1		AAGGTTGTAAGATAGCCCGCGGTTTTTGCATCTACGCTAAAATACGCTTCA
1170393	'+'	1	1	867.81	>100	4.54	1	Cj1242	hypothetical protein	25	321	1	0	0	0	1	0	0	0		AAAGTTTTACAAAGGTATAAATTGGAATAGAAATTGCTTGCTTATTTAATG
1170905	'+'	1	0	4.44	13	1.64	1	Cj1243	uroporphyrinogen decarboxylase	17	1023	1	0	0	0	1	0	0	0		TATAGAAAAATTGACCAATTTAATTTATCAAATTCTGTTATAATTTTGCTA
1171539	'-'	1	1	4.64	16	26.52	1	Cj1243	uroporphyrinogen decarboxylase	NA	1023	0	0	0	1	1	0	0	1		TCAAGCATATAATTAAAAGAGAATTCAAAAAACTTATCATATTCTAAAGCA
1172201	'-'	1	1	6.28	>100	21.56	1	Cj1244	putative radical SAM domain protein	NA	903	0	0	0	1	1	0	0	1		ATAAGCAATTTTTTATCTTTAGCAATGCTGCGTAAAGATAAAATAAGCTCA
1174264	'-'	1	0	5.57	8	1.66	2	Cj1245c	hypothetical protein	228	1197	1	0	0	0	1	0	0	0		AAAAGGAGAATTTAGTCTAAGCATTAACGATAAAAAACTACAATTCTTACA
1174264	'-'	1	0	5.57	8	1.66	2	Cj1246c	excinuclease ABC subunit C	NA	1803	0	0	1	0	1	0	0	0		AAAAGGAGAATTTAGTCTAAGCATTAACGATAAAAAACTACAATTCTTACA
1176107	'+'	1	1	96.83	4.3	5.84	1	Cj1247c	hypothetical protein	NA	495	0	0	0	1	1	0	0	1		GCCCATATGCTTTTATGAGAAATTTAATATAAATTTTGCTATCATCATGAT
1176327	'-'	1	1	655.29	>100	16.98	1	Cj1247c	hypothetical protein	0	495	1	0	0	0	1	0	0	0		TATCCGCAAGCACAGAAGAAAATTAAGAAAAGAAATGCTAAAATCATCTTA
1178066	'+'	1	0	22.61	19.25	1.7	1	Cj1249	hypothetical protein	21	1461	1	0	0	0	1	0	0	0		CTCTTATTTTTAATATAAAATTTTTATAAAAATAAGGCTAGAATTTATTTA
1179587	'+'	1	1	5803.85	>100	9.61	1	6S_RNA	6S_RNA	0	186	1	0	0	0	1	0	0	0		AACTGATTTAAGACATAGAAATTTAAGCTAAATTAAGTTATAATTTCCTTG
1179623	'-'	1	1	56.36	61.67	43.81	1	Cj1249	hypothetical protein	NA	1461	0	0	0	1	1	0	0	1		AAACGATGCCACAGAACACGGTAAATCACACAATCGCAGTTAATAAAAATG
1179623	'-'	1	1	56.36	61.67	43.81	1	6S_RNA	6S_RNA	NA	186	0	0	0	1	1	0	0	1		AAACGATGCCACAGAACACGGTAAATCACACAATCGCAGTTAATAAAAATG
1182488	'-'	1	1	4.34	>100	>100	1	Cj1252	putative periplasmic protein	NA	2049	0	0	0	1	1	0	0	1		CTTGTAAGGTTGTATTGTTGCTAAGTTTAGATGTGTCGATATAATATCTTG
1182725	'-'	1	1	4.07	>100	11.6	1	Cj1252	putative periplasmic protein	NA	2049	0	0	0	1	1	0	0	1		TTCTTTCAGGATCGTTGCTATAATTTACAAAAGAAGCATAAAATCTTTCTG
1182873	'-'	1	1	16.63	5.5	12.48	1	Cj1252	putative periplasmic protein	NA	2049	0	0	0	1	1	0	0	1		AGATAATCTTGCGTGATTTTACCTGATTTTGCTCCTGGTAAAATGTAATTC
1184805	'+'	1	0	14.78	4.33	1.96	1	Cj1253	polynucleotide phosphorylase%2Fpolyadenylase	NA	2160	0	0	1	0	1	0	0	0		TTGCTTACAGAAAAAAATCCTATAAGCGAACGCTTTATGGTAAATTATAAT
1187697	'-'	1	1	100.16	>100	4.47	1	Cj1257c	putative efflux pump	NA	1185	0	0	1	0	1	0	0	0		AAACCCTTATCATCGTTCTTTTTATCACTACTTTTGTGATACAATTTGGTA
1188360	'-'	1	1	869.28	22.38	18.26	2	Cj1257c	putative efflux pump	0	1185	1	0	0	0	1	0	0	1		TATCCTTGAGTTTTAATTAAAAATTATAAAAAATATCATACAATAAATCCA
1188360	'-'	1	1	869.28	22.38	18.26	2	Cj1258	putative phosphotyrosine protein phosphatase	NA	456	0	0	0	1	1	0	0	1		TATCCTTGAGTTTTAATTAAAAATTATAAAAAATATCATACAATAAATCCA
1188384	'+'	1	1	36.59	2.14	2.7	2	Cj1258	putative phosphotyrosine protein phosphatase	30	456	1	0	0	0	1	0	0	1		AAGCAAAGTTCTATTGAAATTTTCCATGGATTTATTGTATGATATTTTTTA
1188384	'+'	1	1	36.59	2.14	2.7	2	Cj1257c	putative efflux pump	NA	1185	0	0	0	1	1	0	0	1		AAGCAAAGTTCTATTGAAATTTTCCATGGATTTATTGTATGATATTTTTTA
1188925	'+'	1	1	1253.29	1.85	5.27	1	CjNC3	CjNC3	0	73	1	0	0	0	1	0	0	0		AACAACTATATATTACTTCTCGTTTACTTTTTAGGCTTATACTTCTAAACG
1189090	'+'	1	1	6032.87	75.88	13.17	1	Cj1259	major outer membrane protein	31	1275	1	0	0	0	1	0	0	0		TTAAGTGCTTCTTAAGAAAAAACTCCAAATTTATGTGCTACAATTACGATG
1189446	'-'	1	1	4.44	4	6.63	1	Cj1259	major outer membrane protein	NA	1275	0	0	0	1	1	0	0	1		TTACACTTGTAGCAACATCTTCATTTGTATAAGTTAAGTATAATTGACGAA
1190999	'-'	1	0	8.5	4.83	1.55	1	Cj1260c	chaperone protein DnaJ	NA	1122	0	0	1	0	1	0	0	0		AAAGCTAGTGAAAAATGTAGTGATTGTAAAGGTTTGGGTTATAATGAAAGC
1191691	'-'	1	1	35.11	2.25	8.43	2	Cj1260c	chaperone protein DnaJ	60	1122	1	0	0	0	1	0	0	1		AATTTTATTTAAAATTTGATAAATTATTGATTTTATTTTTGCTAAAATTAT
1191691	'-'	1	1	35.11	2.25	8.43	2	Cj1261	two-component regulator	NA	672	0	0	0	1	1	0	0	1		AATTTTATTTAAAATTTGATAAATTATTGATTTTATTTTTGCTAAAATTAT
1191712	'-'	1	1	5.17	2.4	6.81	2	Cj1260c	chaperone protein DnaJ	81	1122	0	1	0	0	1	0	0	1		TAGTCTTTAAAATCTTTACATAATTTTATTTAAAATTTGATAAATTATTGA
1191712	'-'	1	1	5.17	2.4	6.81	2	Cj1261	two-component regulator	NA	672	0	0	0	1	1	0	0	1		TAGTCTTTAAAATCTTTACATAATTTTATTTAAAATTTGATAAATTATTGA
1191746	'+'	1	0	5.91	>100	1.66	1	Cj1261	two-component regulator	42	672	0	1	0	0	1	0	0	0		TTTAGCAAAAATAAAATCAATAATTTATCAAATTTTAAATAAAATTATGTA
1191758	'+'	1	1	116.42	7.63	3.51	1	Cj1261	two-component regulator	30	672	1	0	0	0	1	0	0	0		AAAATCAATAATTTATCAAATTTTAAATAAAATTATGTAAAGATTTTAAAG
1193280	'-'	1	1	168.9	26.39	6.36	1	Cj1262	two-component sensor histidine kinase	NA	1236	0	0	0	1	1	0	0	1		AAATCATCTATCATAAGGTGTTCTTTAGCTTCTTCAAGTATAGTGCTAAAA
1198385	'-'	1	0	304.4	13.44	1.97	1	Cj1267c	Ni%2FFe-hydrogenase small chain	32	1140	1	0	0	0	1	0	0	0		GAGAGTAAGTTTTTAACTTTATTTTAACTTTCTTTATTTTATTATTTATAG
1203005	'+'	1	1	6.65	>100	10.21	1	Cj1270c	putative 2-nitropropane dioxygenase%2Coxidoreductase protein	NA	1092	0	0	0	1	1	0	0	1		ACTAAAGCCACATCAGGAAAATCTGCAGTAAATTCAGGTAAATTTGTAGGA
1203822	'-'	1	1	528.89	6.79	6.3	1	Cj1271c	tyrosyl-tRNA synthetase	NA	1206	0	0	1	0	1	0	0	0		ACATTGGTGTTACAGAAAAAGCTAATGATATGTATGCTAAAATTTTAAGTA
1204646	'+'	1	1	3.72	>100	6.63	1	Cj1271c	tyrosyl-tRNA synthetase	NA	1206	0	0	0	1	1	0	0	1		TTAACTTTCTTTATAAGCATCATTTAAAGATGTAAAATCTAAAATTTTACA
1204646	'+'	1	1	3.72	>100	6.63	1	Cj1272c	putative guanosine-3%27%2C5%27-bis%28diphosphate%29 3%27-pyrophosphohydrolase	NA	2196	0	0	0	1	1	0	0	1		TTAACTTTCTTTATAAGCATCATTTAAAGATGTAAAATCTAAAATTTTACA
1207747	'-'	1	1	97.94	2.62	4.6	1	Cj1274c	uridylate kinase	18	720	1	0	0	0	1	0	0	0		TCATTAGCTTAAATTAGCTAAATTTAATGGAATTTAAAATATAATTTCAAG
1207767	'-'	1	1	69.85	32.5	2.99	1	Cj1274c	uridylate kinase	38	720	0	1	0	0	1	0	0	0		TCATATCAATCCTTTGGAACTCATTAGCTTAAATTAGCTAAATTTAATGGA
1208953	'-'	1	0	30.07	11.17	1.88	1	Cj1275c	putative peptidase M23 family protein	NA	1194	0	0	1	0	1	0	0	0		GTAAATACGGTTATGTTTAAGGTTAAAAGATGAGAAAAAATATTCTTATCT
1210458	'-'	1	1	136.38	5.08	3.58	1	Cj1277c	putative ABC transporter ATP-binding protein	29	666	1	0	0	0	1	0	0	0		TAAAATATAATTTTTCTTGAAAATTAAGCAAAAATAAAGCATAATTTAAAA
1211928	'-'	1	1	7.12	2.35	2.46	2	Cj1278c	tRNA %28guanine-N%287%29-%29-methyltransferase	251	1179	1	0	0	0	1	0	0	0		CTATGCCAAAAGATGGTGTAGAAGGTAAAACTTTAGGCAACCCTTTGGCTC
1211928	'-'	1	1	7.12	2.35	2.46	2	Cj1279c	putative fibronectin domain-containing lipoprotein	NA	1236	0	0	1	0	1	0	0	0		CTATGCCAAAAGATGGTGTAGAAGGTAAAACTTTAGGCAACCCTTTGGCTC
1213280	'-'	1	1	18.85	46	2.01	1	Cj1280c	putative ribosomal pseudouridine synthase	NA	969	0	0	1	0	1	0	0	0		ATTTACCTTGCGTTAATTGATTTGCCACTAAAAGAAGATAAAATTATAGTA
1213863	'-'	1	1	58.77	4.96	4.23	2	Cj1280c	putative ribosomal pseudouridine synthase	38	969	1	0	0	0	1	0	0	1		AATCTAAACAAAATTTGCCTTCAGTTGGTAATATAAAGCTATAATTATAAA
1213863	'-'	1	1	58.77	4.96	4.23	2	Cj1282	RodA protein	NA	1101	0	0	0	1	1	0	0	1		AATCTAAACAAAATTTGCCTTCAGTTGGTAATATAAAGCTATAATTATAAA
1213873	'-'	1	1	6.1	3	16.17	2	Cj1280c	putative ribosomal pseudouridine synthase	48	969	0	1	0	0	1	0	0	1		TCTTCTATCTAATCTAAACAAAATTTGCCTTCAGTTGGTAATATAAAGCTA
1213873	'-'	1	1	6.1	3	16.17	2	Cj1282	RodA protein	NA	1101	0	0	0	1	1	0	0	1		TCTTCTATCTAATCTAAACAAAATTTGCCTTCAGTTGGTAATATAAAGCTA
1213877	'+'	1	1	238.76	25.16	10.1	2	Cj1282	RodA protein	26	1101	1	0	0	0	1	0	0	1		TTTTCCTTAGAGGTTTTGATAAATTTAAAATTTTAGTTTATAATTATAGCT
1213877	'+'	1	1	238.76	25.16	10.1	2	Cj1280c	putative ribosomal pseudouridine synthase	NA	969	0	0	0	1	1	0	0	1		TTTTCCTTAGAGGTTTTGATAAATTTAAAATTTTAGTTTATAATTATAGCT
1215038	'+'	1	1	1206.43	4.08	11.7	1	Cjp23	tRNA-Met	19	77	1	0	0	0	1	0	0	0		TATAAAGGCTAAATAAAATATTTTTAAGCATTAATAAGATATAATTTTATC
1215339	'-'	1	1	181.46	3.4	8.56	1	Cjp24	tRNA-Phe	23	76	1	0	0	0	1	0	0	0		ATTTTATTTTTGTATTTAAACTTAAATTAAAGAAAAAAAGATACAATTACA
1215429	'+'	1	1	110.51	>100	11.13	1	Cj1283	putative K%2B uptake protein	27	1344	1	0	0	0	1	0	0	0		AAAAATAAAATTTTATTTCCCTTAAAGTTTTAATAAGATAGAATACCCGCT
1219672	'+'	1	1	15.89	>100	12.2	1	Cj1287c	malate oxidoreductase	NA	1236	0	0	0	1	1	0	0	1		GTCGGAGCCAAAGCCTTGCAAAAATTTACAATCTCTTCTATACTATGAACA
1220223	'-'	1	1	31.05	>100	6.12	2	Cj1287c	malate oxidoreductase	231	1236	1	0	0	0	1	0	0	0		TGAAAATGCAGTGCAAAAATTTGTTAACAAAAATAATTTAGAATTGCTCCA
1220223	'-'	1	1	31.05	>100	6.12	2	Cj1288c	glutamyl-tRNA synthetase	NA	1392	0	0	1	0	1	0	0	0		TGAAAATGCAGTGCAAAAATTTGTTAACAAAAATAATTTAGAATTGCTCCA
1220476	'-'	1	1	5.88	2.36	2.19	1	Cj1288c	glutamyl-tRNA synthetase	NA	1392	0	0	1	0	1	0	0	0		AACTTTTTGATCCTTATCATATCAATAAAAGCGCATCTTGTTATAATGCTA
1221425	'+'	1	1	975.73	11.19	5.54	2	Cj1289	putative periplasmic protein	25	816	1	0	0	0	1	0	0	1		TTTTCGTGCATTTTTTGCCTTTTCTTAAATTTTTATTGATATAATGCGATA
1221425	'+'	1	1	975.73	11.19	5.54	2	Cj1288c	glutamyl-tRNA synthetase	NA	1392	0	0	0	1	1	0	0	1		TTTTCGTGCATTTTTTGCCTTTTCTTAAATTTTTATTGATATAATGCGATA
1222555	'-'	1	1	30.97	2.48	4.79	1	Cj1290c	biotin carboxylase	NA	1332	0	0	1	0	1	0	0	0		TCTAAAACCTTCTTGCCAAGTCCAGGTAAGATTACTAAATACATTCCACCC
1224122	'-'	1	1	678.57	19	9.99	1	Cj1291c	putative biotin carboxyl carrier protein of acetyl-CoA carboxylase	31	456	1	0	0	0	1	0	0	0		ATTTTTTTCTTTTTTAAAGTTAAATTTCAAGTTTTTTTATATAATACAAGG
1224823	'+'	1	0	34.37	56.5	1.45	1	Cj1293	UDP-GlcNAc-specific C4%2C6 dehydratase%2FC5 epimerase	26	1005	1	0	0	0	1	0	0	0		ATAACCTTGCCAAGAATTTTAAAATAGGAACACTTATTGCTTTAATTTTAA
1226376	'+'	1	1	9.24	2.14	2.05	1	Cj1294	C4 aminotransferase	NA	1131	0	0	1	0	1	0	0	0		GGTGCTTTGTATAAAAGTGAAAAAGTAGGAAAAAAAGCCGATCTTTCTATA
1228114	'-'	1	1	8.13	8.33	7.09	1	Cj1295	hypothetical protein	NA	1308	0	0	0	1	1	0	0	1		TTACAAGCCAAAGGAATGTCATTGGTAGTGCTAAGGGTGTGATATAATCCT
1229653	'-'	1	1	7.39	4.33	8.59	1	Cj1298	putative N-acetyltransferase	NA	792	0	0	0	1	1	0	0	1		ATGTCAAGTTTTCTAACATAATAACTAATGGTTTTATTGTATGATATATTG
1229739	'-'	1	1	12.57	6.67	11.35	1	Cj1298	putative N-acetyltransferase	NA	792	0	0	0	1	1	0	0	1		TATGATCTCCTGCAAAATTGTTTTTTTTAAAATTTTTAGTATTATTAACAA
1229886	'+'	1	1	537.57	>100	4.97	2	Cj1299	putative acyl carrier protein	32	231	1	0	0	0	1	0	0	0		ATTAGATATAAACCAAACAATTCTAATAGAAAATTATGATACAATATATTA
1229886	'+'	1	1	537.57	>100	4.97	2	Cj1298	putative N-acetyltransferase	NA	792	0	0	1	0	1	0	0	0		ATTAGATATAAACCAAACAATTCTAATAGAAAATTATGATACAATATATTA
1234522	'-'	1	1	29.38	53.33	3.84	1	Cj1305c	hypothetical protein	NA	1218	0	0	1	0	1	0	0	0		TTAAACAACAAACCATGCAAATATTAAAAATTTTAGGATATGATGTAAGCT
1234831	'+'	1	1	33.63	19.2	26.52	1	Cj1305c	hypothetical protein	NA	1218	0	0	0	1	1	0	0	1		ATAATCACCGTAACTATGTTCCATTTCTCTTCCTAAAATATAATTTAAAGG
1235002	'-'	1	1	20.33	2.12	3.1	1	Cj1305c	hypothetical protein	NA	1218	0	0	1	0	1	0	0	0		CTTTTATCCCACCTAATGGAGATTATCAAAACTATGGCATTATGGCAGCTA
1235530	'-'	1	1	3.7	6	2.49	2	Cj1305c	hypothetical protein	21	1218	0	1	0	0	1	0	0	0		GAAATAAAGTGTTTACTTTTAAAGATGTAGAAAATCAGTTAAAATTGATCA
1235530	'-'	1	1	3.7	6	2.49	2	Cj1306c	hypothetical protein	NA	1227	0	0	1	0	1	0	0	0		GAAATAAAGTGTTTACTTTTAAAGATGTAGAAAATCAGTTAAAATTGATCA
1235749	'-'	1	1	29.38	80.5	3.68	2	Cj1305c	hypothetical protein	240	1218	1	0	0	0	1	0	0	0		TTAAAGAACTAACCATGCAAATATTAAAAATTTTAGGTTACGATGTAAGCT
1235749	'-'	1	1	29.38	80.5	3.68	2	Cj1306c	hypothetical protein	NA	1227	0	0	1	0	1	0	0	0		TTAAAGAACTAACCATGCAAATATTAAAAATTTTAGGTTACGATGTAAGCT
1236773	'-'	1	0	5.91	5	1.62	2	Cj1306c	hypothetical protein	25	1227	1	0	0	0	1	0	0	1		GATATGAGTTGTCATGATTTACCTTTTTAATTTTTTGTAATATAATATCGA
1236773	'-'	1	0	5.91	5	1.62	2	Cj1307	putative amino acid activating enzyme	NA	1509	0	0	0	1	1	0	0	1		GATATGAGTTGTCATGATTTACCTTTTTAATTTTTTGTAATATAATATCGA
1237906	'-'	1	1	1.55	2	5.53	1	Cj1307	putative amino acid activating enzyme	NA	1509	0	0	0	1	1	0	0	1		GGATTTTGAATAAAAGCTTGTTTGGTTTTTTCTTTGTCATTATAATACCCT
1240553	'+'	1	1	5.91	>100	9.08	1	Cj1310c	hypothetical protein	NA	1215	0	0	0	1	1	0	0	1		TAAGAGGAATAATTTGTTCAAAATTATCTTTATTAACCGATAAATGTCCTA
1240911	'-'	1	1	99.05	3.39	5.19	2	Cj1310c	hypothetical protein	24	1215	1	0	0	0	1	0	0	1		AAGCCTTGTTTTTGTGTTTTATTTTACTAAAATTTAAGTATAATTGTCTTT
1240911	'-'	1	1	99.05	3.39	5.19	2	Cj1311	putative acylneuraminate cytidylyltransferase	NA	699	0	0	0	1	1	0	0	1		AAGCCTTGTTTTTGTGTTTTATTTTACTAAAATTTAAGTATAATTGTCTTT
1240937	'+'	1	0	9.98	14.5	1.89	2	Cj1311	putative acylneuraminate cytidylyltransferase	29	699	0	1	0	0	1	0	0	1		ATTTTAAGCCTTTTATTGTATTTTAAAGACAATTATACTTAAATTTTAGTA
1240937	'+'	1	0	9.98	14.5	1.89	2	Cj1310c	hypothetical protein	NA	1215	0	0	0	1	1	0	0	1		ATTTTAAGCCTTTTATTGTATTTTAAAGACAATTATACTTAAATTTTAGTA
1240947	'+'	1	1	167.06	7.19	4.11	2	Cj1311	putative acylneuraminate cytidylyltransferase	19	699	1	0	0	0	1	0	0	1		TTTTATTGTATTTTAAAGACAATTATACTTAAATTTTAGTAAAATAAAACA
1240947	'+'	1	1	167.06	7.19	4.11	2	Cj1310c	hypothetical protein	NA	1215	0	0	0	1	1	0	0	1		TTTTATTGTATTTTAAAGACAATTATACTTAAATTTTAGTAAAATAAAACA
1241392	'-'	1	1	4.34	>100	3.87	1	Cj1311	putative acylneuraminate cytidylyltransferase	NA	699	0	0	0	1	1	0	0	1		TTCATCAAACATATAAACTTGATTGTTTTCATTTAGATAAAATGCCCTTTG
1244131	'-'	1	0	3.1	6	1.66	1	Cj1315c	imidazole glycerol phosphate synthase subunit HisH	NA	606	0	0	1	0	1	0	0	0		TTCATAGCTAAAAATCCAAAAGATTTGCAAAAAGCAGATAAATTGCTTTTA
1245413	'-'	1	1	334.85	2.41	2.32	1	Cj1316c	pseudaminic acid biosynthesis PseA protein	21	1137	1	0	0	0	1	0	0	0		AAATATATAAAATCATAAAATAAAATTTAATTATAACGATATATATATTTA
1245435	'-'	1	1	251.69	4.35	6.73	1	Cj1316c	pseudaminic acid biosynthesis PseA protein	43	1137	0	1	0	0	1	0	0	0		TTTTTTAATTTTTATATAATATAAATATATAAAATCATAAAATAAAATTTA
1245439	'+'	1	1	2.17	>100	11.6	2	Cj1317	Pse synthetase	211	1032	0	1	0	0	1	0	0	1		TCATAAATTTCCTTTAATTAGTCTTAAATATATATATCGTTATAATTAAAT
1245439	'+'	1	1	2.17	>100	11.6	2	Cj1316c	pseudaminic acid biosynthesis PseA protein	NA	1137	0	0	0	1	1	0	0	1		TCATAAATTTCCTTTAATTAGTCTTAAATATATATATCGTTATAATTAAAT
1245459	'-'	1	0	5.54	3.4	1.58	1	Cj1316c	pseudaminic acid biosynthesis PseA protein	67	1137	0	1	0	0	1	0	0	0		GATTTAAATTATAGAATTCATTCATTTTTTAATTTTTATATAATATAAATA
1245578	'+'	1	1	1.85	2.67	9.08	1	Cj1317	Pse synthetase	72	1032	0	1	0	0	1	0	0	0		TGAAACCAAGCAAAATCATAACAAAGTTGTAATATTTATATAATATAAATA
1245598	'-'	1	1	3.1	4.33	5.39	2	Cj1316c	pseudaminic acid biosynthesis PseA protein	206	1137	0	1	0	0	1	0	0	1		CTTTTCTTTCTTTGGTAAATTTCCTGACTAAAATGATATATAATTATATTA
1245598	'-'	1	1	3.1	4.33	5.39	2	Cj1317	Pse synthetase	NA	1032	0	0	0	1	1	0	0	1		CTTTTCTTTCTTTGGTAAATTTCCTGACTAAAATGATATATAATTATATTA
1245612	'+'	1	1	815.14	39.56	8.36	1	Cj1317	Pse synthetase	38	1032	1	0	0	0	1	0	0	0		TTTATATAATATAAATATATAAATTGAAGAAATATATAATATAATTATATA
1246689	'+'	1	1	18.66	3.4	7.76	1	Cj1318	motility accessory factor	NA	1950	0	0	1	0	1	0	0	0		TATAAAATTTGGCGATGCTTTAAAACAAGGAGATTTCCAATGACCTTCACC
1247509	'-'	1	1	8.29	>100	3.4	1	Cj1318	motility accessory factor	NA	1950	0	0	0	1	1	0	0	1		CAACATACAAACATAATCAGGTTTTATACCATGTTTAGCTAAAATAGGATA
1248029	'+'	1	1	9.44	4.82	2.3	1	Cj1318	motility accessory factor	NA	1950	0	0	1	0	1	0	0	0		AAATTGGTTTGAAAATGAAATGATTCCAAATACTAGAAAAATGGGTATCAC
1248148	'-'	1	1	10.05	5.89	12.77	1	Cj1318	motility accessory factor	NA	1950	0	0	0	1	1	0	0	1		TTTATAATAAGCCTTAAGTAAAAATTCATTTTGTTTATTTAAACTTAAAGG
1248434	'+'	1	1	46.82	5.83	4.11	2	Cj1319	putative nucleotide sugar dehydratase	190	972	1	0	0	0	1	0	0	0		TTTACAACCTCTGCGTACTCAATTTGAACTTAATCTTGCTAGAATTTATGT
1248434	'+'	1	1	46.82	5.83	4.11	2	Cj1318	motility accessory factor	NA	1950	0	0	1	0	1	0	0	0		TTTACAACCTCTGCGTACTCAATTTGAACTTAATCTTGCTAGAATTTATGT
1249096	'-'	1	1	61.72	>100	19.69	1	Cj1319	putative nucleotide sugar dehydratase	NA	972	0	0	0	1	1	0	0	1		TAAAAGGGCGTGCAATATTGACATTTAAATTAAAAGAATTATAATAACTCA
1249629	'-'	1	1	8.87	>100	6.81	1	Cj1319	putative nucleotide sugar dehydratase	NA	972	0	0	0	1	1	0	0	1		TTTTTCTCATTGCCTATAAAGCAAGGCTCATGTAGGGCGATATTTTCTTTA
1249629	'-'	1	1	8.87	>100	6.81	1	Cj1320	putative DegT family aminotransferase	NA	1155	0	0	0	1	1	0	0	1		TTTTTCTCATTGCCTATAAAGCAAGGCTCATGTAGGGCGATATTTTCTTTA
1250712	'-'	1	1	19.22	27	8.75	1	Cj1320	putative DegT family aminotransferase	NA	1155	0	0	0	1	1	0	0	1		GAATTAAATTTTGCAACGCATCATTCCTTTTTATTTGCTATTCTAACGCTA
1250728	'+'	1	1	19.96	28	3	2	Cj1321	putative transferase	124	543	1	0	0	0	1	0	0	0		AAAAATTAGAAAAACGCTTGATTAATTTACCTAGTAGCGTTAGAATAGCAA
1250728	'+'	1	1	19.96	28	3	2	Cj1320	putative DegT family aminotransferase	NA	1155	0	0	1	0	1	0	0	0		AAAAATTAGAAAAACGCTTGATTAATTTACCTAGTAGCGTTAGAATAGCAA
1252219	'+'	1	1	6.28	>100	4.64	1	Cj1324	hypothetical protein	59	1122	0	1	0	0	1	0	0	0		TTTTAGGTAGAAAAATAAAACAAACATAAGTGATATTTTATAAAATAAGCA
1252244	'+'	1	1	21.07	2.68	5.43	1	Cj1324	hypothetical protein	34	1122	0	1	0	0	1	0	0	0		ATAAGTGATATTTTATAAAATAAGCAAATATTAATTTAATATTTTATACAA
1252251	'+'	1	1	16351.2	16.77	4.66	1	Cj1324	hypothetical protein	27	1122	1	0	0	0	1	0	0	0		ATATTTTATAAAATAAGCAAATATTAATTTAATATTTTATACAATCTAATA
1256261	'+'	1	1	107.55	42.57	3.42	2	Cj1329	putative sugar-phosphate nucleotide transferase	31	1026	1	0	0	0	1	0	0	0		TAAAATCATAAAAACTTGCCTAAAAAATGTAAATTTAGATACAATTTTACA
1256261	'+'	1	1	107.55	42.57	3.42	2	Cj1328	putative UDP-N-acetylglucosamine 2-epimerase	NA	1155	0	0	1	0	1	0	0	0		TAAAATCATAAAAACTTGCCTAAAAAATGTAAATTTAGATACAATTTTACA
1257726	'+'	1	1	137.8	8	10.91	1	Cj1330	hypothetical protein	NA	906	0	0	1	0	1	0	0	0		TTTAAAAGGTGAAAAAATTTATTTTGCTAGTTTGGTTTGTAATTCTTATTT
1258037	'+'	1	1	212.15	>100	2.47	2	Cj1331	acylneuraminate cytidylyltransferase	175	708	1	0	0	0	1	0	0	0		AAATTATCATCCATACTTTAGAAAAAAGCTTTAAAGCCGATTTGATAAACA
1258037	'+'	1	1	212.15	>100	2.47	2	Cj1330	hypothetical protein	NA	906	0	0	1	0	1	0	0	0		AAATTATCATCCATACTTTAGAAAAAAGCTTTAAAGCCGATTTGATAAACA
1258638	'-'	1	1	9.24	3.5	9.93	1	Cj1331	acylneuraminate cytidylyltransferase	NA	708	0	0	0	1	1	0	0	1		GGATTTTACTACCTTGTTATTTTGTATTTCTACGAGGTTAAAATAAGGATT
1260493	'-'	1	1	8.29	>100	3.4	1	Cj1333	PseD protein	NA	1962	0	0	0	1	1	0	0	1		CAAAGAAAGCACATAATCGGGCTTAATATTATGCTTAGCTAAAATAGGATA
1261096	'-'	1	1	12.2	12.5	10.21	1	Cj1333	PseD protein	NA	1962	0	0	0	1	1	0	0	1		TTCTAATTTTTCAAAAGGTTTATTTAAATCTTTATGAAGTAAATTCTCACA
1261268	'+'	1	1	32.52	>100	9.08	1	Cj1333	PseD protein	NA	1962	0	0	1	0	1	0	0	0		TTGTAGAGATTTTAGTAATAAATTTATTAAAAGCTATGATAAAATAAAAAA
1261445	'+'	1	1	46.82	5.71	3.46	2	Cj1334	motility accessory factor	190	1860	1	0	0	0	1	0	0	0		TTTAGGTCCCCTACTAACTCAATTTGAACTTAATCTTGCTAGAATTTATGT
1261445	'+'	1	1	46.82	5.71	3.46	2	Cj1333	PseD protein	NA	1962	0	0	1	0	1	0	0	0		TTTAGGTCCCCTACTAACTCAATTTGAACTTAATCTTGCTAGAATTTATGT
1261644	'-'	1	1	10.84	>100	>100	1	Cj1333	PseD protein	NA	1962	0	0	0	1	1	0	0	1		TAAAAACTCATCGACCTCAAACAAAGCTTGAGTATTTTTTAAAAAAAGCTC
1261644	'-'	1	1	10.84	>100	>100	1	Cj1334	motility accessory factor	NA	1860	0	0	0	1	1	0	0	1		TAAAAACTCATCGACCTCAAACAAAGCTTGAGTATTTTTTAAAAAAAGCTC
1261977	'-'	1	1	8.13	7.5	3.32	1	Cj1334	motility accessory factor	NA	1860	0	0	0	1	1	0	0	1		AGTATAAAAAAGTATTAGTTGTTCTTTTTTTAATTCTTCGCTAAAATCAAA
1262171	'-'	1	1	3.72	>100	21.55	1	Cj1334	motility accessory factor	NA	1860	0	0	0	1	1	0	0	1		TCATGTGGATCATTACCTTTGTTTAAAACGATAAATCGTATCATTTCTATC
1262340	'+'	1	1	499.32	39.6	4.95	1	Cj1334	motility accessory factor	NA	1860	0	0	1	0	1	0	0	0		AATTTCTCAAAGAAAGAAGAGCTAAGGTTGAAAATGCTATCATTGTTTCTA
1262421	'-'	1	1	6.58	>100	3.82	1	Cj1334	motility accessory factor	NA	1860	0	0	0	1	1	0	0	1		TAGCATGCAAACATAATCAGGCTTTATACCATGTTTAGCTAAAATAGGATA
1263012	'-'	1	1	6.66	>100	10.66	1	Cj1334	motility accessory factor	NA	1860	0	0	0	1	1	0	0	1		TTTTGGAAAATCAAAAGGTTTATTTAAATCTTTATCAAGTAAATTCTCACA
1263518	'+'	1	1	18.66	2.4	4.74	1	Cj1335	motility accessory factor	NA	1948	0	0	1	0	1	0	0	0		AATTTTGACGATATAATCAAAAAATAATTAGGATTTCCAATGACCTTCACC
1264336	'-'	1	1	8.29	>100	3.4	1	Cj1335	motility accessory factor	NA	1948	0	0	0	1	1	0	0	1		CAACATACAAACATAATCAGGTTTTATACCATGTTTAGCTAAAATAGGATA
1264856	'+'	1	1	9.44	4.82	2.3	1	Cj1335	motility accessory factor	NA	1948	0	0	1	0	1	0	0	0		AAATTGGTTTGAAAATGAAATGATTCCAAATACTAGAAAAATGGGTATCAC
1264975	'-'	1	1	10.05	5.89	12.77	1	Cj1335	motility accessory factor	NA	1948	0	0	0	1	1	0	0	1		TTTATAATAAGCCTTAAGTAAAAATTCATTTTGTTTATTTAAACTTAAAGG
1265261	'+'	1	1	46.82	5.83	4.11	2	Cj1337	PseE protein	190	1887	1	0	0	0	1	0	0	0		TTTACAACCTCTGCGTACTCAATTTGAACTTAATCTTGCTAGAATTTATGT
1265261	'+'	1	1	46.82	5.83	4.11	2	Cj1335	motility accessory factor	NA	1948	0	0	1	0	1	0	0	0		TTTACAACCTCTGCGTACTCAATTTGAACTTAATCTTGCTAGAATTTATGT
1265460	'-'	1	1	10.84	5.62	24.87	1	Cj1335	motility accessory factor	NA	1948	0	0	0	1	1	0	0	1		GTTATACTCAAAACCGCTTAAAGCTTTTAAATTTTTGTTAAAATTATTTTC
1265460	'-'	1	1	10.84	5.62	24.87	1	Cj1337	PseE protein	NA	1887	0	0	0	1	1	0	0	1		GTTATACTCAAAACCGCTTAAAGCTTTTAAATTTTTGTTAAAATTATTTTC
1269112	'-'	1	1	55.27	>100	3.52	1	Cj1338c	flagellin	26	1719	1	0	0	0	1	0	0	0		AAATTTTTAATTAAACTAAAACTTGGAACACTTTTTGCTTTAATCTTTTCG
1270994	'-'	1	1	21146.7	>100	5.17	1	Cj1339c	flagellin	44	1719	1	0	0	0	1	0	0	0		TTTTATTGCTAAAGTATAAAATATTTTTTTGATTGCACGATATAGCATTTA
1272156	'-'	1	1	3.51	5.75	2.27	1	Cj1340c	hypothetical protein	NA	1818	0	0	1	0	1	0	0	0		GAATCTTAAGTGAAAGAAAAAACAAATTTGAAAATGCTATAGTAGTTTCTG
1273976	'-'	1	1	3.51	5.75	2.05	1	Cj1341c	motility accessory factor	NA	1824	0	0	1	0	1	0	0	0		GAATCTTAAGTGAAAGAAAAAACAAATTTGAAAATGCTATAGTAGTTTCTG
1274424	'+'	1	1	2.01	>100	21.55	1	Cj1341c	motility accessory factor	NA	1824	0	0	0	1	1	0	0	1		TCACTTTCAAATACAAAAAGATGTTTATAGTGTTTAGCTAAATTTTTAATC
1275009	'-'	1	1	26.32	22.25	5.46	1	Cj1342c	motility accessory factor	NA	1242	0	0	1	0	1	0	0	0		TTAAAACAATCAAAATGTTTAAAAACTTGCTTTATAAGTTATCATTCCTTA
1277373	'-'	1	1	4.07	8	2.21	1	Cj1344c	putative DNA-binding%2Firon metalloprotein%2FAP endonuclease	NA	1008	0	0	1	0	1	0	0	0		TGATGATAGTTCTATAGCTATCATTGATAAAAACACCTTAGAATGTAAATT
1277958	'+'	1	1	5.91	3	14.75	1	Cj1345c	putative periplasmic protein	NA	1395	0	0	0	1	1	0	0	1		TCCTTCTGCGATAACAGCCGTAAGTTCATTGCTTGTGTTATAATTTAACTC
1278660	'-'	1	0	97.94	14.25	1.88	1	Cj1345c	putative periplasmic protein	NA	1395	0	0	1	0	1	0	0	0		CTGGTGGATTTCATGCGGCAAGTTTACTTTTGAGTGATTATAATATCACTA
1279265	'-'	1	1	148.58	51.25	3.01	1	Cj1346c	1-deoxy-D-xylulose 5-phosphate reductoisomerase	NA	1071	0	0	1	0	1	0	0	0		GAGGCTTATCATTTATATGATTTTAAAGAAATTGATGCTTTAATAGAACCA
1281130	'-'	1	1	816.06	5.26	5.65	2	Cj1348c	putative coiled-coil protein	140	339	1	0	0	0	1	0	0	0		ATTGTATCAAACAAGCAAAAAATCAGCCTCGATGTGATAGAATTTGCTGCA
1281130	'-'	1	1	816.06	5.26	5.65	2	Cj1349c	putative fibronectin%2Ffibrinogen-binding protein	NA	1308	0	0	1	0	1	0	0	0		ATTGTATCAAACAAGCAAAAAATCAGCCTCGATGTGATAGAATTTGCTGCA
1282299	'-'	1	1	73.18	>100	7.32	2	Cj1349c	putative fibronectin%2Ffibrinogen-binding protein	0	1308	1	0	0	0	1	0	0	1		TTAATGTAATTCTACCACAAAATTCGCCAAAATATTTTATAATTTCTTTTA
1282299	'-'	1	1	73.18	>100	7.32	2	Cj1350	putative molybdopterin-guanine dinucleotide biosynthesis protein	NA	576	0	0	0	1	1	0	0	1		TTAATGTAATTCTACCACAAAATTCGCCAAAATATTTTATAATTTCTTTTA
1284490	'-'	1	1	14.04	20	9.08	1	Cj1352	enterochelin uptake permease	NA	969	0	0	0	1	1	0	0	1		GCCATACTGCCTTGTAGCCAACCTTGGATATTTTGTATATAATTTAAAGCA
1284682	'+'	1	1	26.24	33	16.79	2	Cj1353	enterochelin uptake permease	287	939	1	0	0	0	1	0	0	0		GGCATGGGTGAAGATATAGCTTTAAATCTTGGAATTTCTTATAATGGTATA
1284682	'+'	1	1	26.24	33	16.79	2	Cj1352	enterochelin uptake permease	NA	969	0	0	1	0	1	0	0	0		GGCATGGGTGAAGATATAGCTTTAAATCTTGGAATTTCTTATAATGGTATA
1284874	'+'	1	1	3.41	>100	>100	2	Cj1353	enterochelin uptake permease	95	939	0	1	0	0	1	0	0	0		ATAGCACTTTGTGGAGCTTTGTTTTTACTTGTTTGCGATATCATTTCAAGA
1284874	'+'	1	1	3.41	>100	>100	2	Cj1352	enterochelin uptake permease	NA	969	0	0	1	0	1	0	0	0		ATAGCACTTTGTGGAGCTTTGTTTTTACTTGTTTGCGATATCATTTCAAGA
1285862	'-'	1	1	6.28	3.12	6.3	1	Cj1353	enterochelin uptake permease	NA	939	0	0	0	1	1	0	0	1		TTTAATCATAATTTATTACCCTTTAATACAAGATAGATAAAATATATCCCA
1285862	'-'	1	1	6.28	3.12	6.3	1	Cj1354	enterochelin uptake ATP-binding protein	NA	756	0	0	0	1	1	0	0	1		TTTAATCATAATTTATTACCCTTTAATACAAGATAGATAAAATATATCCCA
1286962	'-'	1	1	39.92	>100	2.55	1	Cj1355	enterochelin uptake periplasmic binding protein	NA	993	0	0	0	1	1	0	0	1		ACACTAGGTTTGTTTTTAAATTGTTGTAGGTATTTTGGTAAATTTTTAGCA
1287118	'-'	1	1	191.63	>100	8.2	1	Cj1355	enterochelin uptake periplasmic binding protein	NA	993	0	0	0	1	1	0	0	1		AAAGAGCTTAAAAAATTTGCATTATCAAGACCTACAAATAAAGTTGGAGCT
1287838	'-'	1	1	571.01	4.95	8.24	1	Cjp25	tRNA-Ser	12	90	0	1	0	0	1	0	0	0		TTTTCCTAGCTTTTTAAGCTAGGTATTATTTATTTTTTTGTATAATCATAC
1290996	'-'	1	1	445.36	7.34	4.07	1	Cj1358c	putative periplasmic cytochrome C	54	516	1	0	0	0	1	0	0	0		GTAAATATATCTTTAAAATTATATTAAATTCATCTATGTTAGAATCACAAA
1291275	'-'	1	1	2.59	8	>100	1	Cj1359	polyphosphate kinase	NA	2085	0	0	0	1	1	0	0	1		AACTCCAGCTGAAAAAAGTTGTTTTAAGCCTGCGACGCGTATCATATAAAA
1292128	'-'	1	1	23.95	34	14.18	1	Cj1359	polyphosphate kinase	NA	2085	0	0	0	1	1	0	0	1		TGATAAATTTATAAACTGGATCAAAACTTTCAAAAGGTTGTATAATGAGTA
1292496	'+'	1	1	56.18	51.67	3.66	1	Cj1359	polyphosphate kinase	NA	2085	0	0	1	0	1	0	0	0		ATAAACTTAAATTTTATATGCATTTAAGTACGGGAAATTATAATGCAAGCA
1293658	'-'	1	0	1799.43	75.5	1.77	1	Cjs01		0	359	1	0	0	0	1	0	0	0		CGGTTTTTAATCCTTTAATTGTTAATGTTCCAAATATTATTTCTAAATAAG
1293675	'-'	1	1	12.94	4.5	2.39	2	Cjs01		17	359	0	1	0	0	1	0	0	0		TGATGATTCTGTTTTAGCGGTTTTTAATCCTTTAATTGTTAATGTTCCAAA
1293675	'-'	1	1	12.94	4.5	2.39	2	Cj1361c	hypothetical protein	NA	453	0	0	1	0	1	0	0	0		TGATGATTCTGTTTTAGCGGTTTTTAATCCTTTAATTGTTAATGTTCCAAA
1294095	'-'	1	1	100.95	3.27	2.49	2	Cj1361c	hypothetical protein	NA	453	0	0	1	0	1	0	0	1		TTTGGAAAAATTAAAATAAGATTTTAGCTAAAATTTGCTAGAATTTACATT
1294095	'-'	1	1	100.95	3.27	2.49	2	Cj1362	Holliday junction DNA helicase RuvB	NA	1008	0	0	0	1	1	0	0	1		TTTGGAAAAATTAAAATAAGATTTTAGCTAAAATTTGCTAGAATTTACATT
1294130	'+'	1	1	247.63	3.55	7.92	2	Cj1362	Holliday junction DNA helicase RuvB	30	1008	1	0	0	0	1	0	0	1		TAATCATTAAAGTTTAATGTAAATTCTAGCAAATTTTAGCTAAAATCTTAT
1294130	'+'	1	1	247.63	3.55	7.92	2	Cj1361c	hypothetical protein	NA	453	0	0	0	1	1	0	0	1		TAATCATTAAAGTTTAATGTAAATTCTAGCAAATTTTAGCTAAAATCTTAT
1299446	'+'	1	1	7.76	11.5	6.96	1	Cj1365c	putative secreted serine protease	NA	3126	0	0	0	1	1	0	0	1		TTAGAAAATTCAGCATCATAACCTGCAGTGTTTATAGTATAATAAGCTGTA
1299847	'-'	1	0	28.83	7	1.55	1	Cj1365c	putative secreted serine protease	NA	3126	0	0	1	0	1	0	0	0		AAAATTTCCCCTTTTTGGATGGTAAGCAAATTGCTGATATACTATTAAGTA
1300306	'-'	1	1	343.1	32.66	8.24	1	Cj1365c	putative secreted serine protease	NA	3126	0	0	1	0	1	0	0	0		GATTAGTAGATTGTACTCAAACTAATCAAGGGACAAGCTATAATATCTGTA
1300773	'-'	1	0	5.17	2.6	0.9	1	Cj1365c	putative secreted serine protease	NA	3126	0	0	1	0	1	0	0	0		AATAGAAATGAAAAAATTTTTTTGTTTAACTTTAGTTTGTAAACTTTTTGC
1302322	'+'	1	1	7.02	>100	4.76	1	Cj1366c	glucosamine--fructose-6-phosphate aminotransferase	NA	1797	0	0	0	1	1	0	0	1		TCTTTTTCAAGTTTATCTTTGATTTCTTTATAATTTTCTATAATACCATTG
1302841	'-'	1	1	21.44	9.2	2.38	2	Cj1366c	glucosamine--fructose-6-phosphate aminotransferase	226	1797	1	0	0	0	1	0	0	0		TGAAAAAAATTAAAAAGCCAATCATTAAAAAAGATGAGTTAAAATTAGACT
1302841	'-'	1	1	21.44	9.2	2.38	2	Cj1367c	putative nucleotidyltransferase	NA	2349	0	0	1	0	1	0	0	0		TGAAAAAAATTAAAAAGCCAATCATTAAAAAAGATGAGTTAAAATTAGACT
1305000	'-'	1	1	19.96	3.35	3.87	1	Cj1367c	putative nucleotidyltransferase	32	2349	1	0	0	0	1	0	0	0		AGTTTATAGAAAAAGCCAAAATAAAAGATATTTTTGTTAAGATTATTATTA
1305082	'+'	1	1	1069.75	5.89	7.97	1	Cj1368	hypothetical protein	30	1065	1	0	0	0	1	0	0	0		TTGGCTTTTTCTATAAACTCTTTTTCAGTAAGCAAAAATTATAATGCTTTA
1305531	'-'	1	1	2.59	9	14.92	1	Cj1368	hypothetical protein	NA	1065	0	0	0	1	1	0	0	1		TTTTCTATCACTTCTTCATAACTCATTTTAAAACGACGATGTAAAAAATCA
1307982	'+'	1	1	25.5	5	2.93	1	Cj1371	putative periplasmic protein	25	699	1	0	0	0	1	0	0	0		GGATTTTTACTGGGATATAAATCTTGATTAAAAATTTGCTATAATTTTACT
1308555	'-'	1	1	87.32	9.29	9.52	1	Cj1371	putative periplasmic protein	NA	699	0	0	0	1	1	0	0	1		AAACTAAGTTCATTACCAAATCCATAAGCACTTATAGCTATACTTGCCCAA
1310618	'+'	1	0	2.22	7	1.05	1	Cj1373	putative integral membrane protein	NA	2472	0	0	1	0	1	0	0	0		AAAAAGCGTCGCATGATTTATGAAATTTCAGTTCTTGCTATAATCTTAGCT
1311541	'-'	1	1	3.7	5	4.92	1	Cj1373	putative integral membrane protein	NA	2472	0	0	0	1	1	0	0	1		TCATCATAACACTAAAACCTAAAACTATGCTAATGGTAGTATAATAAAGTG
1311597	'+'	1	1	25.87	5.67	4.19	1	Cj1373	putative integral membrane protein	NA	2472	0	0	1	0	1	0	0	0		ATTATACTACCATTAGCATAGTTTTAGGTTTTAGTGTTATGATGAGTAGTA
1312424	'-'	1	1	26.98	4.04	6.47	1	Cj1374c	putative deoxyribonucleotide triphosphate pyrophosphatase	36	603	1	0	0	0	1	0	0	0		TACCATTTTGTATTTAAAAGCTACGCACAAGGATAAATTTTATAAAATCAT
1312522	'+'	1	1	201.06	>100	5.1	1	Cj1375	putative multidrug efflux transporter	33	1296	1	0	0	0	1	0	0	0		GTAAAACGATGTTAATCAATGCTTAATCCATTTCATAGTAAAATTATCCTA
1312898	'-'	1	1	5.17	>100	>100	1	Cj1375	putative multidrug efflux transporter	NA	1296	0	0	0	1	1	0	0	1		CCATTACCGCCATGGCTTTACCACGATTTTCTTCTGTGATAAAATCACTTA
1313072	'+'	1	1	5.91	12	3.98	1	Cj1375	putative multidrug efflux transporter	NA	1296	0	0	1	0	1	0	0	0		TAGCCTTTTTGATCTTAGTGCGGCTTTGTCTCTTTTATGTATAATTTTACT
1313194	'-'	1	1	2.59	>100	>100	1	Cj1375	putative multidrug efflux transporter	NA	1296	0	0	0	1	1	0	0	1		TAAATGTTTTACTAGAATAATAGGAATACTTAAAAATGCTATACTCATAAG
1315704	'-'	1	1	149.32	7.73	7.02	1	Cj1377c	putative ferredoxin	NA	1662	0	0	1	0	1	0	0	0		GCAAAAGTCCAAAATATCATTATAAAACTTATATTAGCTATAATGCTAGTG
1316344	'-'	1	0	26.63	87	1.11	2	Cj1377c	putative ferredoxin	34	1662	1	0	0	0	1	0	0	1		TGTTCATCTTAAGCCTTAAGAAAATATTTGGTTATTTTAACATAGAATTTA
1316344	'-'	1	0	26.63	87	1.11	2	Cj1378	selenocysteine synthase	NA	1323	0	0	0	1	1	0	0	1		TGTTCATCTTAAGCCTTAAGAAAATATTTGGTTATTTTAACATAGAATTTA
1316368	'+'	1	1	44.28	2.04	2.88	2	Cj1378	selenocysteine synthase	20	1323	1	0	0	0	1	0	0	1		CTTAATCTCTTTAAAACATCATTTTATAAATTCTATGTTAAAATAACCAAA
1316368	'+'	1	1	44.28	2.04	2.88	2	Cj1377c	putative ferredoxin	NA	1662	0	0	0	1	1	0	0	1		CTTAATCTCTTTAAAACATCATTTTATAAATTCTATGTTAAAATAACCAAA
1319051	'-'	1	1	6.28	>100	4.97	1	Cj1379	putative selenocysteine-specific elongation factor	NA	1806	0	0	0	1	1	0	0	1		ATCCAATAAATTTGACATTTCTTTAAGCCCAAGTTCGCAAAAATTTTCACT
1319534	'+'	1	1	521.5	79.39	2.19	1	Cj1380	putative periplasmic protein	27	711	1	0	0	0	1	0	0	0		CTGAAAAAAGATTTTTAACAAACATTTAGAAAATCATTATAGAATTAAACA
1320034	'-'	1	1	1.85	>100	8.29	1	Cj1380	putative periplasmic protein	NA	711	0	0	0	1	1	0	0	1		GCGGATTTTTCAAAAGCAGATTTTCCATGTACTGGAGTTAAAATATAATTA
1321381	'-'	1	1	1266.97	77.18	7.04	2	Cj1382c	flavodoxin FldA	38	492	0	1	0	0	1	0	0	0		AAATAAAACATTTTTTGTGTGATTTAAACAAAACTATGTTAAAATTAGTTC
1321381	'-'	1	1	1266.97	77.18	7.04	2	Cj1383c	hypothetical protein	NA	696	0	0	1	0	1	0	0	0		AAATAAAACATTTTTTGTGTGATTTAAACAAAACTATGTTAAAATTAGTTC
1321844	'-'	1	1	5.17	3	10.02	1	Cj1383c	hypothetical protein	NA	696	0	0	1	0	1	0	0	0		AATACCAAGAGTTTAAAAATGATATTTGGAAATTTTTTGCATAATATAATG
1322097	'+'	1	1	8.87	>100	9.45	1	Cj1383c	hypothetical protein	NA	696	0	0	0	1	1	0	0	1		TTTATAGCAAGAAAATTCTTTATTAAGATTAAAAATTTTACAATATTCACA
1322097	'+'	1	1	8.87	>100	9.45	1	Cj1384c	hypothetical protein	NA	315	0	0	0	1	1	0	0	1		TTTATAGCAAGAAAATTCTTTATTAAGATTAAAAATTTTACAATATTCACA
1323005	'-'	1	1	29.94	8.5	16.91	1	Cj1385	catalase	NA	1425	0	0	0	1	1	0	0	1		CTCATAAGAATGGTTACTTGATGTAAACTTTCAGGACATAAACTCCAAAAA
1325165	'-'	1	1	759.51	3.89	7.03	1	Cj1387c	helix-turn-helix containing protein	31	657	1	0	0	0	1	0	0	0		AAAATTTTATTTTTAAGAAATGTTTTAAAGTATAAAGAGTAGAATTTAATA
1325172	'-'	1	1	10.35	29	3.16	1	Cj1387c	helix-turn-helix containing protein	38	657	0	1	0	0	1	0	0	0		TAATAATAAAATTTTATTTTTAAGAAATGTTTTAAAGTATAAAGAGTAGAA
1325272	'+'	1	1	90.18	12.37	12.57	1	Cj1388	putative endoribonuclease L-PSP	30	363	1	0	0	0	1	0	0	0		ATGATAATAAACTATTGACAAATTATTATTGTAGTGATAAAATGCATTCTG
1325858	'+'	1	1	10.72	10	5.53	1	Cj1389	pseudo	NA	1440	0	0	1	0	1	0	0	0		TATTGTCGCTAAAGGTTCTTTAAATTTAGGTTTTTTTGATATTTTTCAAGT
1328481	'-'	1	1	4.34	>100	26.52	1	Cj1394	adenylosuccinate lyase	NA	1368	0	0	0	1	1	0	0	1		GGTCTTTTTAAATTCAGCAAAGATAAAGTCCATATCCATAAATTTATAATG
1329969	'-'	1	1	4.44	12	19.89	1	Cj1395	pseudo	NA	1341	0	0	0	1	1	0	0	1		TGCTAACATGAAAACCATAACTTAAACAAAGAGGAGTTAAAATCGCACTTG
1330499	'-'	1	1	50.16	2.03	8.84	1	Cj1395	pseudo	NA	1341	0	0	0	1	1	0	0	1		TTCATCTGCTTTTAAGCCATCATTTTTTAAAGCTATGGCACAATCAATAAG
1331052	'-'	1	1	14.86	>100	15.91	1	Cj1395	pseudo	NA	1341	0	0	0	1	1	0	0	1		CGTTTAAAGTCATTGTAATTCCTAAATTAATAATAAATATTATAATAAAAA
1331052	'-'	1	1	14.86	>100	15.91	1	Cj1397	putative ferrous iron transport protein	NA	225	0	0	0	1	1	0	0	1		CGTTTAAAGTCATTGTAATTCCTAAATTAATAATAAATATTATAATAAAAA
1331069	'+'	1	1	790.93	>100	5.87	1	Cj1397	putative ferrous iron transport protein	21	225	1	0	0	0	1	0	0	0		TTCTTTTTACAAGAAGGATAATTTCATTACACTTTTTTATTATAATATTTA
1331399	'-'	1	1	21.07	>100	13.26	1	Cj1397	putative ferrous iron transport protein	NA	225	0	0	0	1	1	0	0	1		AAAAAGTTTTTGCGCTTGCTTTTTCTATAGTAACTCCGCTAAAATTTCCTA
1331399	'-'	1	1	21.07	>100	13.26	1	Cj1398	ferrous iron transport protein	NA	1842	0	0	0	1	1	0	0	1		AAAAAGTTTTTGCGCTTGCTTTTTCTATAGTAACTCCGCTAAAATTTCCTA
1333018	'+'	1	1	12.57	10.17	6.32	1	Cj1398	ferrous iron transport protein	NA	1842	0	0	1	0	1	0	0	0		TACCAAGTGCAGTGGCTTTTATTTTATTTGTAATGATTTATAATCCTTGCT
1333164	'-'	1	1	32.52	30.33	2.06	2	Cj1399c	putative Ni%2FFe-hydrogenase small subunit	NA	1494	0	0	1	0	1	0	0	1		GCTTATAGCATTTTAAAAGCTTTTGAAGATAATATCGCTAAAATTTCATCA
1333164	'-'	1	1	32.52	30.33	2.06	2	Cj1398	ferrous iron transport protein	NA	1842	0	0	0	1	1	0	0	1		GCTTATAGCATTTTAAAAGCTTTTGAAGATAATATCGCTAAAATTTCATCA
1338370	'-'	1	1	2118.82	45.79	7.35	2	Cj1403c	glyceraldehyde 3-phosphate dehydrogenase	25	999	1	0	0	0	1	0	0	1		AAAAGTGCTATCTTCATTAAAATTTTAACCTTTTTTTGTAGAATATTAGCA
1338370	'-'	1	1	2118.82	45.79	7.35	2	Cj1404	putative nicotinate-nucleotide adenylyltransferase	NA	546	0	0	0	1	1	0	0	1		AAAAGTGCTATCTTCATTAAAATTTTAACCTTTTTTTGTAGAATATTAGCA
1338377	'+'	1	1	9.98	11	9.12	2	Cj1404	putative nicotinate-nucleotide adenylyltransferase	27	546	1	0	0	0	1	0	0	1		TAGCAACTTTTACAGCCATTTAATTTCCTTTTGCAAAATATAATGCTAATA
1338377	'+'	1	1	9.98	11	9.12	2	Cj1403c	glyceraldehyde 3-phosphate dehydrogenase	NA	999	0	0	0	1	1	0	0	1		TAGCAACTTTTACAGCCATTTAATTTCCTTTTGCAAAATATAATGCTAATA
[truncated: 469 more rows]

## Sheet: RM1221
Table S4. TSS detected in the individual C. jejuni strains - RM1221.
This table lists all TSS that were detected in C. jejuni RM1221.
Pos	Strand	detected	enriched	stepHeight	stepFactor	enrichmentFactor	classCount	Locus_tag	Product	UTRlength	GeneLength	Primary	Secondary	Internal	Antisense	Automated	Manual	Putative sRNA	Putative asRNA	Comment	Sequence -50 nt upstream + TSS (51nt)
1396	'+'	1	1	81.47	3.39	9.51	1	CJE0002	DNA polymerase III subunit beta	87	1068	1	0	0	0	1	0	0	0		TTCTAGAGTGTGAAAAAAAGAAATTAAGCAAAGTATGATAAAATACAAATT
1896	'-'	1	1	1.27	>100	4.34	1	CJE0002	DNA polymerase III subunit beta	NA	1068	0	0	0	1	1	0	0	1		TTTAAGGAGTATTTTGGGTTGTTTGTATCAATACTTGGTAATATCTTTTTA
2199	'-'	1	1	6.79	9	>100	1	CJE0002	DNA polymerase III subunit beta	NA	1068	0	0	0	1	1	0	0	1		TCAGTTGAAAAGCTGAGTTCTTGTTTGAAAGTTTTTGGTATAACTTTTTCA
2398	'-'	1	1	2.77	8	>100	1	CJE0002	DNA polymerase III subunit beta	NA	1068	0	0	0	1	1	0	0	1		AGAAGTTAAGAAATCAAGTAAATATTTGATTTTTATAGTAAGATTAAATTC
2522	'-'	1	1	11.85	16	10.02	1	CJE0002	DNA polymerase III subunit beta	NA	1068	0	0	0	1	1	0	0	1		CCTTTATCTTTTACTTGTTTTATTACAAAATCATAGGCATAATAATCATTG
2522	'-'	1	1	11.85	16	10.02	1	CJE0003	DNA gyrase subunit B	NA	2310	0	0	0	1	1	0	0	1		CCTTTATCTTTTACTTGTTTTATTACAAAATCATAGGCATAATAATCATTG
4464	'-'	1	1	11.46	3.64	12.52	1	CJE0003	DNA gyrase subunit B	NA	2310	0	0	0	1	1	0	0	1		TTTGAGTTTGAACGAAAGCTCGAATTTCATTTTCGTTGATATAATGATTTA
6523	'-'	1	1	342.87	19.68	3.83	1	CJE0005	molybdopterin oxidoreductase family protein	27	1239	1	0	0	0	1	0	0	0		ATTAATTATATTAATTATTTAAATTTTTAAAATTTATAATAAAATAAAAGA
6677	'+'	1	1	2.97	2.5	10.96	1	CJE0006	Na%2B%2FH%2B antiporter family protein	30	1302	0	1	0	0	1	0	0	0		TCATCATATGTTCGAGTTTTATTACATTTTAACTAAGTTTTTTCTACAATT
6681	'+'	1	1	79.35	26.4	12.58	1	CJE0006	Na%2B%2FH%2B antiporter family protein	26	1302	1	0	0	0	1	0	0	0		CATATGTTCGAGTTTTATTACATTTTAACTAAGTTTTTTCTACAATTAAAT
8101	'+'	1	1	15.28	4.27	5.01	1	CJE0007	glutamate synthase%2C large subunit	41	4491	1	0	0	0	1	0	0	0		TAAGATAAAAATTATATCGATTTTAAAAAAATGTATGCTATAATCCTTATA
9295	'+'	1	1	11.03	>100	3.76	1	CJE0007	glutamate synthase%2C large subunit	NA	4491	0	0	1	0	1	0	0	0		TGGTTTTCGTCCTTCAAGGTATTATCTTACAAAAGATGATATGCTCATACT
11737	'+'	1	1	11.88	1.78	3.86	1	CJE0007	glutamate synthase%2C large subunit	NA	4491	0	0	1	0	1	0	0	0		AAGTGTGCAAGGTAAAGCAGGAAAGCTAAATTTAGATAAAATTTTAAAATC
11810	'-'	1	1	9.34	2.69	9.08	1	CJE0007	glutamate synthase%2C large subunit	NA	4491	0	0	0	1	1	0	0	1		GGCTCTTTTTTCTCCACAGCATTTTTACAAAGTGGTAGTAAAATTCTATAA
12083	'-'	1	1	9.48	>100	30.68	1	CJE0007	glutamate synthase%2C large subunit	NA	4491	0	0	0	1	1	0	0	1		TCTTCAGGTGAAAAAGTGGCTTCATTTGAAATTTTTGCTATGATTTTACCA
14151	'+'	1	0	1.98	6	1.46	1	CJE0009	ribonuclease HII	NA	576	0	0	0	1	1	0	0	1		AAACTTTTTCGGTGGAGTTTGCAAATTCCAAATTTAGCTATAAATTCTTTA
14811	'+'	1	1	5.09	>100	>100	1	CJE0010	competence protein ComEA	NA	240	0	0	0	1	1	0	0	1		TAAGATCATCAATACTTGTAAAATTTGCTTCTTTGCGGTATTCTAAAATCG
14962	'-'	1	0	45.83	6.8	1.57	1	CJE0010	competence protein ComEA	27	240	1	0	0	0	1	0	0	0		ATTTTTGGGTTAAGTTAAGAAATTCTTATCCTTTTTAAGATAATATTATAA
14975	'+'	1	1	5.94	>100	>100	1	CJE0010	competence protein ComEA	NA	240	0	0	0	1	1	0	0	1		AATTTTTTCATTTTCTTATCCTTTTATTAAAAAATAATTATAATATTATCT
14975	'+'	1	1	5.94	>100	>100	1	CJE0011	rubrerythrin	NA	552	0	0	0	1	1	0	0	1		AATTTTTTCATTTTCTTATCCTTTTATTAAAAAATAATTATAATATTATCT
15373	'+'	1	1	2.55	7	5.11	1	CJE0011	rubrerythrin	NA	552	0	0	0	1	1	0	0	1		TAGTTACTTCTAAAGGTTTTCCATCAACGATTTCATGATAAGCTTTAAATT
15669	'-'	1	1	230.21	14.91	3.74	1	CJE0011	rubrerythrin	118	552	1	0	0	0	1	0	0	0		ATAAAAATTATTAATTGACAAAAATATTTTTTTATAATACAATGCTTTTTG
15980	'+'	1	0	11.46	3.08	1.56	1	CJE0012	dihydroxy-acid dehydratase	NA	1677	0	0	1	0	1	0	0	0		GATATAATCCCAGGACATTATTTTTTAAATAATTATGCTAAAATCATTAAA
17957	'-'	1	1	62.38	19.37	4.57	1	CJE0013	pseudo	66	397	0	1	0	0	1	0	0	0		TTTAAGAGAGTATTTTAAAATTTAAATAAGATTTTTATACTACTATTTTCA
18395	'-'	1	1	5.53	2.38	2.37	1	CJE0015	hypothetical protein	NA	1227	0	0	1	0	1	0	0	0		TATCAGCCCTGTAAAATACGGCATTGATGGACTTCATGATATCATAAATGA
18417	'+'	1	1	5.52	3.17	13.74	1	CJE0015	hypothetical protein	NA	1227	0	0	0	1	1	0	0	1		TCTTTCATTAATAAGTTTCATTTCATAATCATTTATGATATCATGAAGTCC
19257	'-'	1	1	50.5	63	6.74	2	CJE0015	hypothetical protein	48	1227	1	0	0	0	1	0	0	1		ACAAAGTGCTTTTTTACTCATTTTTATCCTTAAATTTGCTATAATTTCACA
19257	'-'	1	1	50.5	63	6.74	2	CJE0016	ExsB	NA	675	0	0	0	1	1	0	0	1		ACAAAGTGCTTTTTTACTCATTTTTATCCTTAAATTTGCTATAATTTCACA
19263	'+'	1	1	125.18	3.38	5.33	2	CJE0016	ExsB	24	675	1	0	0	0	1	0	0	1		TTTGCCTTTTTTTGCAATTTAAATTTAAAAATTTTCGTTAAAATTGTGAAA
19263	'+'	1	1	125.18	3.38	5.33	2	CJE0015	hypothetical protein	NA	1227	0	0	0	1	1	0	0	1		TTTGCCTTTTTTTGCAATTTAAATTTAAAAATTTTCGTTAAAATTGTGAAA
20556	'-'	1	1	196.75	9.31	5.76	1	CJE0017	DsbB family disulfide bond formation protein	NA	1527	0	0	1	0	1	0	0	0		TGATCCTTATTTTTCAGCTACTATTGATCCAATCATCGGTATCATACCTTA
21710	'-'	1	1	91.8	>100	7.18	1	CJE0018	hypothetical protein	23	168	1	0	0	0	1	0	0	0		TTTCAATAAAAATTTTATTTTTAATTTATGTTTTTCAAGTAAAATTAGCAG
22939	'+'	1	1	2.97	>100	>100	1	CJE0019	methyl-accepting chemotaxis protein	NA	1782	0	0	0	1	1	0	0	1		TGGGTAAAAGTGTTAAGTTGTTTTAACTCTTTCATGAGAGAATTATTCTCA
24348	'+'	1	1	4.74	>100	>100	1	CJE0020	cytochrome c551 peroxidase	NA	915	0	0	0	1	1	0	0	1		TATGGCAAGTATTGCACGAAACTTTTCCATCTTTGGATAAACTTTTATCCA
24512	'-'	1	1	186.29	4.66	11.22	1	CJE0020	cytochrome c551 peroxidase	34	915	1	0	0	0	1	0	0	0		ATAAAAAATATCAATTATTAAATAATTTACTAAAATTATACTATAATGGCA
24535	'+'	1	1	7.9	15	8.04	1	CJE0020	cytochrome c551 peroxidase	NA	915	0	0	0	1	1	0	0	1		TTTCTGCCTTAATTTAAGTTTTTAAAATGCCATTATAGTATAATTTTAGTA
24535	'+'	1	1	7.9	15	8.04	1	CJE0021	fumarylacetoacetate hydrolase family protein	NA	879	0	0	0	1	1	0	0	1		TTTCTGCCTTAATTTAAGTTTTTAAAATGCCATTATAGTATAATTTTAGTA
24928	'-'	1	1	29.7	24.33	3.08	1	CJE0021	fumarylacetoacetate hydrolase family protein	NA	879	0	0	1	0	1	0	0	0		AAATCAAAGCTAAAGATGCAAAAGATTATATCTTTGGCTATACTATTATCA
25374	'+'	1	1	7.51	>100	41.64	1	CJE0021	fumarylacetoacetate hydrolase family protein	NA	879	0	0	0	1	1	0	0	1		TTTCAATGCCAAGATCATCAAAACTTACAATTTTTCCACTAGAATTTAGTA
25996	'+'	1	1	6.79	4.33	14.25	1	CJE0022	RNA pseudouridylate synthase family protein	NA	903	0	0	0	1	1	0	0	1		TAAAATTTTCTTCTATTTTTCCGTTAGCTAGAGCAAGGTATTCTTTTTGAA
26473	'+'	1	1	177.38	1.83	7.02	2	CJE0023	adenylosuccinate lyase	40	1329	1	0	0	0	1	0	0	1		TTATGTAAGCCATTTAATAACTTTCTTAGGATAATTTGATATAATTTCTGT
26473	'+'	1	1	177.38	1.83	7.02	2	CJE0022	RNA pseudouridylate synthase family protein	NA	903	0	0	0	1	1	0	0	1		TTATGTAAGCCATTTAATAACTTTCTTAGGATAATTTGATATAATTTCTGT
26483	'-'	1	1	29.28	6.31	9.34	2	CJE0022	RNA pseudouridylate synthase family protein	48	903	1	0	0	0	1	0	0	1		TCTGCTATATCTTTCAACCATCTTTGAAACCTTTTTAGCTATAATTTTATA
26483	'-'	1	1	29.28	6.31	9.34	2	CJE0023	adenylosuccinate lyase	NA	1329	0	0	0	1	1	0	0	1		TCTGCTATATCTTTCAACCATCTTTGAAACCTTTTTAGCTATAATTTTATA
28152	'+'	1	1	12.73	8.5	3.21	1	CJE0024	ribonucleotide-diphosphate reductase subunit alpha	NA	2370	0	0	1	0	1	0	0	0		ATTTGATTTATATAAAAAAGTTAATGGTATGAATCGCTATAATCATTTGCG
31723	'-'	1	1	47.01	13.33	6.48	1	CJE0025	sodium%2Fdicarboxylate symporter	73	1386	1	0	0	0	1	0	0	0		ATAAATCATACTGATTTTATCTTATTTAAAATATTGTTATGCTACCATTTA
32491	'+'	1	1	5.93	>100	3.73	2	CJE0027	CTP synthetase	22	1632	1	0	0	0	1	0	0	1		TTACTTAAAATTCTAATGAAATAAAAAGTTTTATCAAGCTATAATTAGATA
32491	'+'	1	1	5.93	>100	3.73	2	CJE0026	FAD-dependent thymidylate synthase	NA	624	0	0	0	1	1	0	0	1		TTACTTAAAATTCTAATGAAATAAAAAGTTTTATCAAGCTATAATTAGATA
34388	'+'	1	1	19.1	5.83	2.61	1	CJE0028	single-stranded-DNA-specific exonuclease RecJ	NA	1572	0	0	1	0	1	0	0	0		ATTATGGCAGAATTTTTCGATGATATAGGTTTTGATTATATTATAAGAATT
34551	'-'	1	1	6.79	>100	8.77	1	CJE0028	single-stranded-DNA-specific exonuclease RecJ	NA	1572	0	0	0	1	1	0	0	1		ATCTTTTTGCTTTGGATTGATAATGGCAAAAGCATCAGGTAAAATATCTTG
35724	'+'	1	1	11.46	>100	2.92	1	CJE0029	L-asparaginase	74	996	0	1	0	0	1	0	0	0		CACAGTTTGTTGTTAAAGAGATTTTATAAAAATTTTTACTTATAATTTGCA
36471	'+'	1	1	27.58	12	3.2	1	CJE0029	L-asparaginase	NA	996	0	0	1	0	1	0	0	0		TTTTGATGTAAGCAAACTCACAAGTTTGCCAAAAGTAGATATTCTTTATAG
36873	'-'	1	1	86.14	4.76	3.57	2	CjNC9	CjNC9	12	52	0	1	0	0	1	0	0	1		GGGGGGGGAGGGGTTAAATGATAATAAAAAATACAAGATATAATATAAAGA
36873	'-'	1	1	86.14	4.76	3.57	2	CJE0029	L-asparaginase	NA	996	0	0	0	1	1	0	0	1		GGGGGGGGAGGGGTTAAATGATAATAAAAAATACAAGATATAATATAAAGA
37025	'+'	1	1	3.56	>100	6.82	1	orphan	orphan	NA	NA	0	0	0	0	1	0	0	0		ACTATTTAATCCTTTGTTTAATCCCCTTTTAAGTTTAATTGGTTATACTTT
37030	'+'	1	1	60.82	8.96	7.18	1	orphan	orphan	NA	NA	0	0	0	0	1	0	0	0		TTAATCCTTTGTTTAATCCCCTTTTAAGTTTAATTGGTTATACTTTCATTT
38776	'+'	1	1	5790.73	10.41	18.41	2	CJE_tRNA-Ala-1	tRNA-Ala	237	76	1	0	0	0	1	0	0	0		GTAGATCAGCCATGCTACGGTGAATACGTTCCCGGGTCTTGTACTCACCGC
38776	'+'	1	1	5790.73	10.41	18.41	2	CJE_Cj16SA	16S ribosomal RNA	NA	1513	0	0	1	0	1	0	0	0		GTAGATCAGCCATGCTACGGTGAATACGTTCCCGGGTCTTGTACTCACCGC
38888	'+'	1	1	96.4	1.97	2.82	2	CJE_tRNA-Ala-1	tRNA-Ala	125	76	0	1	0	0	1	0	0	0		AGTGGAATCAGCGACTGGGGTGAAGTCGTAACAAGGTAACCGTAGGAGAAC
38888	'+'	1	1	96.4	1.97	2.82	2	CJE_Cj16SA	16S ribosomal RNA	NA	1513	0	0	1	0	1	0	0	0		AGTGGAATCAGCGACTGGGGTGAAGTCGTAACAAGGTAACCGTAGGAGAAC
39013	'+'	1	0	69.45	4.23	1.82	1	CJE_tRNA-Ala-1	tRNA-Ala	0	76	0	1	0	0	1	0	0	0		ATTGATTCTTGTTTAGATTTCAAAGATTGATGATAAAGCTAATTGTTTATG
39346	'+'	1	1	3.54	3.5	6.74	1	orphan	orphan	NA	NA	0	0	0	0	1	0	0	0		AATAGATATAAGTAGCATATACATTATGCATTTATATTTATAATGATTATG
39360	'+'	1	1	13.3	2.36	5.72	1	orphan	orphan	NA	NA	0	0	0	0	1	0	0	0		GCATATACATTATGCATTTATATTTATAATGATTATGTTAATATATATACT
39636	'-'	1	1	6.51	>100	6.58	1	CJE_Cj23SA	23S ribosomal RNA	NA	3063	0	0	0	1	1	0	0	1		TTCTAAAACGCATCACTTCCTTGTTAAAGTTTTTATGATAAGACTTCTTTA
43018	'+'	1	1	112957	57.76	2.17	2	CJE0030	hypothetical protein	223	1398	1	0	0	0	1	0	0	0		TTAAGCTTTATTTTTTAAATTCAATCTTTCAAAGAATATTTAAATAACAAT
43018	'+'	1	1	112957	57.76	2.17	2	CJE_r01	5S ribosomal RNA	NA	120	0	0	1	0	1	0	0	0		TTAAGCTTTATTTTTTAAATTCAATCTTTCAAAGAATATTTAAATAACAAT
43586	'+'	1	1	11.06	29	3.97	1	CJE0030	hypothetical protein	NA	1398	0	0	1	0	1	0	0	0		GGATAGATATTTTAATAACATTAAGTGATAAAAGATATATTATAATAGAAA
44253	'-'	1	1	4.24	2.13	12.42	1	CJE0030	hypothetical protein	NA	1398	0	0	0	1	1	0	0	1		TACATGGATATATGCTTTCATTCTTATAATCAATAGGATAAAATATAAACA
44347	'+'	1	1	17.82	15	7.23	1	CJE0030	hypothetical protein	NA	1398	0	0	1	0	1	0	0	0		CCATGTATATATATTTATTTTAAAAAAAAATACTATGATATTATTGGTTTG
44677	'+'	1	1	48.38	5.81	4.25	1	CJE0031	type II restriction-modification enzyme	22	3774	1	0	0	0	1	0	0	0		TTAAATTCTTAAAAAATTTTATATAAAAGTAAAATTTGATAAAATACAAAA
45065	'-'	1	1	55.31	8.37	3.51	1	CJE0031	type II restriction-modification enzyme	NA	3774	0	0	0	1	1	0	0	1		GATGATAATAAATTTTAAGCTAAAACTATACTCTCTATTTCTAAAATAATA
47764	'+'	1	1	6.72	7	2.56	1	CJE0031	type II restriction-modification enzyme	NA	3774	0	0	1	0	1	0	0	0		AAAAGAAATGAAATTTTAGCAAATTGCAAAGATGAAGCCGAAAAAGAACGC
49312	'+'	1	1	4.74	4	2.57	1	CJE0032	hypothetical protein	NA	2457	0	0	1	0	1	0	0	0		ATCAAGATGAAAGTTATAAAAACGAACATAAATTAAGATATGCTAAAAATT
49964	'-'	1	1	7.21	18	6.58	1	CJE0032	hypothetical protein	NA	2457	0	0	0	1	1	0	0	1		TAAGGCTAATAAAAATAATTAATAACATTAATAAAACGATATAATTCATTG
50072	'-'	1	1	3.82	5.5	>100	1	CJE0032	hypothetical protein	NA	2457	0	0	0	1	1	0	0	1		AATAAAAAGCTGGAATGTATATTGGTGATAAAAATGATACTATGCTGATTA
50097	'+'	1	1	15.28	5.5	6.36	1	CJE0032	hypothetical protein	NA	2457	0	0	1	0	1	0	0	0		TTATTTCTTATTTATGGTCTTTTTATAATCAGCATAGTATCATTTTTATCA
50493	'+'	1	1	5.93	2.36	3.17	1	CJE0032	hypothetical protein	NA	2457	0	0	1	0	1	0	0	0		GCAAATAAAGAAAAATTAAAAGAAATTTTATCTAAAGTGTATAATGATAAA
50942	'-'	1	1	7.51	8.5	2.12	1	CJE0032	hypothetical protein	NA	2457	0	0	0	1	1	0	0	1		TGGTTTCTACTATAGAATACTACTTAAAAGACTGATGATAAAATTTCAAGC
51679	'-'	1	1	15.61	3.38	3.64	2	CJE0033	hypothetical protein	20	702	1	0	0	0	1	0	0	0		CTTTTGTAATGTGTGCTTGCGTATTGGTTGCAAATATGATATATTTTCTAA
51679	'-'	1	1	15.61	3.38	3.64	2	CJE0034	Bcr%2FCflA subfamily drug resistance transporter	NA	1203	0	0	1	0	1	0	0	0		CTTTTGTAATGTGTGCTTGCGTATTGGTTGCAAATATGATATATTTTCTAA
52883	'-'	1	1	13.58	3.82	9.21	2	CJE0034	Bcr%2FCflA subfamily drug resistance transporter	25	1203	1	0	0	0	1	0	0	1		TTTAACATAGAAAAACAAAGATTATTCTAAGATTGACTTGTTAAAATCATT
52883	'-'	1	1	13.58	3.82	9.21	2	CJE0035	hypothetical protein	NA	1350	0	0	0	1	1	0	0	1		TTTAACATAGAAAAACAAAGATTATTCTAAGATTGACTTGTTAAAATCATT
52894	'-'	1	1	3.82	>100	13.01	2	CJE0034	Bcr%2FCflA subfamily drug resistance transporter	36	1203	0	1	0	0	1	0	0	1		TTTTCCCTAAATTTAACATAGAAAAACAAAGATTATTCTAAGATTGACTTG
52894	'-'	1	1	3.82	>100	13.01	2	CJE0035	hypothetical protein	NA	1350	0	0	0	1	1	0	0	1		TTTTCCCTAAATTTAACATAGAAAAACAAAGATTATTCTAAGATTGACTTG
54637	'+'	1	1	59.83	>100	14.25	1	CJE0036	cytochrome c family protein	NA	1044	0	0	0	1	1	0	0	1		AAAGGCATGGCTGATTTTAAAAATCTTGCTAAAAATGGTATCATAGCCATG
55404	'-'	1	1	8.49	>100	>100	1	CJE0036	cytochrome c family protein	27	1044	1	0	0	0	1	0	0	0		TTATTCTTATTATGCTTAATATTTAAGAAAAAATACACTAAAATCAATTTG
56444	'-'	1	0	6.79	4.2	1.39	2	CJE0037	hypothetical protein	242	648	1	0	0	0	1	0	0	0		TACTTTTCATAGAGCCTCAAACTAAAGTTTATACCGGTATGATTATAGGTG
56444	'-'	1	0	6.79	4.2	1.39	2	CJE0038	GTP-binding protein TypA	NA	1809	0	0	1	0	1	0	0	0		TACTTTTCATAGAGCCTCAAACTAAAGTTTATACCGGTATGATTATAGGTG
57518	'-'	1	1	30.13	5.73	4.97	1	CJE0038	GTP-binding protein TypA	NA	1809	0	0	1	0	1	0	0	0		TAGCCCTAGATGCAAACGATGAGCAACTTGACTTTGCTATAGTTTATGCTG
58041	'-'	1	1	183.74	2.37	11.31	1	CJE0038	GTP-binding protein TypA	31	1809	1	0	0	0	1	0	0	0		TCCAAGTTTTGATACTTTGTAGTTTAAGTTAAATTTTTGTATAATTTAAGC
58047	'-'	1	1	24.61	>100	85.31	2	CJE0038	GTP-binding protein TypA	37	1809	0	1	0	0	1	0	0	1		AAGTGTTCCAAGTTTTGATACTTTGTAGTTTAAGTTAAATTTTTGTATAAT
58047	'-'	1	1	24.61	>100	85.31	2	CJE0039	hypothetical protein	NA	324	0	0	0	1	1	0	0	1		AAGTGTTCCAAGTTTTGATACTTTGTAGTTTAAGTTAAATTTTTGTATAAT
58116	'+'	1	1	55.31	5.83	2.87	1	CJE0039	hypothetical protein	29	324	1	0	0	0	1	0	0	0		TAAACTACAAAGTATCAAAACTTGGAACACTTCTTGCTTTAAAAACTTATG
60799	'-'	1	1	2.37	2	26.3	1	CJE0041	flagellar basal body rod modification protein	NA	885	0	0	0	1	1	0	0	1		TAGCATCGCTTTTTTCACTGAAAACAAGTTTATTATTGCTATCATAAATTT
61245	'+'	1	0	7.64	4.6	0.84	1	CJE0042	flagellar hook protein	NA	1638	0	0	1	0	1	0	0	0		ACAAAGAGGAAAAGGCATAAGCCATGATGAATTCATTTTATAATGGGATTT
61348	'-'	1	1	5.09	13	4.7	1	CJE0042	flagellar hook protein	NA	1638	0	0	0	1	1	0	0	1		AACCACCTTGAGCAGGGTTGGTTGATTGGGTTGTTATGGTAGTATAAAAAA
62933	'+'	1	1	9.34	>100	17.35	1	CJE0043	hypothetical protein	NA	1872	0	0	0	1	1	0	0	1		TTCAAAAATAATTTTAATTTCTTCTATGTCGCTTTCGCTATAATTATGGCT
63142	'-'	1	1	30.98	57	4.18	1	CJE0043	hypothetical protein	NA	1872	0	0	1	0	1	0	0	0		AAAATACAATCATCTTAGCATTTCGTATAAAAAACTTGTAAAATTAAAATA
63576	'+'	1	1	4.24	>100	14.46	1	CJE0043	hypothetical protein	NA	1872	0	0	0	1	1	0	0	1		TTTCCACCCATGCAGTTTTCAACAAATACATTTTTAGCTATAATTGTCCCA
65034	'+'	1	1	31.4	5.2	9.5	1	CJE0044	hypothetical protein	NA	765	0	0	0	1	1	0	0	1		TTGTTTGATTGATTTTAGTTTTATGTATTGTTCTAAGGTATAATGGATTTC
65436	'+'	1	1	32	11.57	8.86	2	SRP_RNA_Cjs03	SRP_RNA_Cjs03	194	108	0	1	0	0	1	0	0	1		TAGTTCGTGTTGTTTGTCTAATTGCATATTTTTAATGCTAAAATCTCTACT
65436	'+'	1	1	32	11.57	8.86	2	CJE0044	hypothetical protein	NA	765	0	0	0	1	1	0	0	1		TAGTTCGTGTTGTTTGTCTAATTGCATATTTTTAATGCTAAAATCTCTACT
65474	'-'	1	1	1659.84	33.56	7.7	1	CJE0044	hypothetical protein	23	765	1	0	0	0	1	0	0	0		TTTATTTATAAAAACTATTATTTTATTCTCTAAAAATACGATATAAAAATA
65598	'+'	1	1	163.37	4.12	5.77	1	SRP_RNA_Cjs03	SRP_RNA_Cjs03	32	108	0	1	0	0	1	0	0	0		TAACCAATTTATTATTTATATATTATTTTTTTAGTTTTATAATTCTCAAGG
65630	'+'	1	1	14145.6	12.48	9.76	1	SRP_RNA_Cjs03	SRP_RNA_Cjs03	0	108	1	0	0	0	1	0	0	0		AGTTTTATAATTCTCAAGGCTTTTTAAGTATATTGTGATATAATTTTAGAG
65857	'+'	1	1	190.53	>100	6.97	1	CJE0046	pseudo	21	1478	1	0	0	0	1	0	0	0		AAATTATAATTTTAAGATTTATTAAAATATTAGTTAACTAGAATTTCATTA
66207	'-'	1	1	121.36	3.89	7.96	1	CJE0046	pseudo	NA	1478	0	0	0	1	1	0	0	1		ATTTTAAATTTGATATAGCAGTATTTACCTTTTCATCTTATACTCTTTTGA
66230	'+'	1	1	3.56	>100	>100	1	CJE0046	pseudo	NA	1478	0	0	1	0	1	0	0	0		AAATACTTCAGTACTTGATTTTTTATATCAAAAGAGTATAAGATGAAAAGG
66373	'-'	1	1	3.82	>100	18.8	1	CJE0046	pseudo	NA	1478	0	0	0	1	1	0	0	1		ATAAGCAATACCTAAGGTTTTTTTACCAAGAATACTGATAAAATGATAAGC
68462	'+'	1	1	8.91	4.33	14.46	1	CJE0048	tRNA-specific 2-thiouridylase MnmA	NA	1017	0	0	0	1	1	0	0	1		TAGAATTTTCATTAAATTTCCTTTAAAGTATTAATTATAAAATCCAAGTCG
68462	'+'	1	1	8.91	4.33	14.46	1	CJE0049	lysine decarboxylase family protein	NA	606	0	0	0	1	1	0	0	1		TAGAATTTTCATTAAATTTCCTTTAAAGTATTAATTATAAAATCCAAGTCG
68718	'-'	1	1	35.95	2.1	2.24	2	CJE0048	tRNA-specific 2-thiouridylase MnmA	295	1017	1	0	0	0	1	0	0	0		ATTTTTACCTCACGAGCAAAAACTTAATGATTTTGTAGAATATAATATTAC
68718	'-'	1	1	35.95	2.1	2.24	2	CJE0049	lysine decarboxylase family protein	NA	606	0	0	1	0	1	0	0	0		ATTTTTACCTCACGAGCAAAAACTTAATGATTTTGTAGAATATAATATTAC
69050	'-'	1	1	146.4	2.25	4.76	1	CJE0049	lysine decarboxylase family protein	22	606	1	0	0	0	1	0	0	0		AAACTTATATAATAAAGAACTTATTATAAATTTTTAGCTAGAATGGAATTT
69082	'-'	1	1	5.52	14	10.12	1	CJE0049	lysine decarboxylase family protein	54	606	0	1	0	0	1	0	0	0		AAATTCCTAATCTTAATAAAATAAACCTATTAAAACTTATATAATAAAGAA
69694	'+'	1	1	30.98	15.6	11.28	1	CJE0051	hypothetical protein	NA	993	0	0	0	1	1	0	0	1		AATCCAGTAAAGAAAGTCATAAAAATACCACTTTTTGTTATAGTTTTATCA
70926	'-'	1	1	18.67	15.67	5.23	2	CJE0053	hypothetical protein	46	204	1	0	0	0	1	0	0	1		AGCAATGAATGTTCCAAATAAAAAAATTTGATTTTAATATATAATTTATGA
70926	'-'	1	1	18.67	15.67	5.23	2	CJE0054	HmcD domain-containing protein	NA	855	0	0	0	1	1	0	0	1		AGCAATGAATGTTCCAAATAAAAAAATTTGATTTTAATATATAATTTATGA
71359	'+'	1	1	5.73	>100	5.58	1	CJE0054	HmcD domain-containing protein	NA	855	0	0	1	0	1	0	0	0		ATATACAAACTTTTTTACAAATGAGTATTCTAGTAAAAACAGAATAGGTTT
71919	'-'	1	1	54.92	25.6	8.83	1	CJE0054	HmcD domain-containing protein	NA	855	0	0	0	1	1	0	0	1		AAGTTTGCCTTATTACTCTTTCGTTTTTAATTTCTTGATAGGATTTAACTA
71919	'-'	1	1	54.92	25.6	8.83	1	CJE0055	peptidase family protein	NA	597	0	0	0	1	1	0	0	1		AAGTTTGCCTTATTACTCTTTCGTTTTTAATTTCTTGATAGGATTTAACTA
72246	'+'	1	1	24.19	9.25	9.83	1	CJE0055	peptidase family protein	NA	597	0	0	1	0	1	0	0	0		TGTAAAAATTGAAGATGATCCACGCTTTCCACATTTTGTTATAATTATCAA
72988	'+'	1	1	9.09	>100	12.6	1	CJE0056	flagellar motor switch protein FliY	NA	822	0	0	0	1	1	0	0	1		AAAATCTACGCTTTCAGGCACAAATTCACAAGATTCTATGCTAAAATCCAT
73450	'-'	1	0	27.16	65	1.24	2	CJE0056	flagellar motor switch protein FliY	132	822	1	0	0	0	1	0	0	0		TTAGCACAAATTGGATTGCATCGTTTTAGAAAATCTATTAAAATTTTAGAA
73450	'-'	1	0	27.16	65	1.24	2	CJE0057	flagellar motor switch protein FliM	NA	1080	0	0	1	0	1	0	0	0		TTAGCACAAATTGGATTGCATCGTTTTAGAAAATCTATTAAAATTTTAGAA
73698	'-'	1	0	32.4	6.86	1.83	1	CJE0057	flagellar motor switch protein FliM	NA	1080	0	0	1	0	1	0	0	0		ATTTAGAAAGTATATTAAGCCGTTTAGCAAACCGTGATATTATGATGGGTG
77266	'+'	1	1	44.56	22	13.38	1	CJE0061	flagellar biosynthesis regulator FlhF	NA	1455	0	0	0	1	1	0	0	1		TTTTTCAAATTGCTTTTCAAAATTTTCTATTTTTTTATTATAATTTGGATT
77696	'+'	1	1	3.56	>100	9.86	1	CJE0061	flagellar biosynthesis regulator FlhF	NA	1455	0	0	0	1	1	0	0	1		CTGCGATTTAAGGTTTTAGGACGAATTTGTTTATTTGTTATAATTAAAGCT
77696	'+'	1	1	3.56	>100	9.86	1	CJE0062	2-amino-4-hydroxy-6-hydroxymethyldihydropteridine pyrophosphokinase	NA	474	0	0	0	1	1	0	0	1		CTGCGATTTAAGGTTTTAGGACGAATTTGTTTATTTGTTATAATTAAAGCT
77739	'+'	1	1	7.64	2.8	43.83	1	CJE0061	flagellar biosynthesis regulator FlhF	NA	1455	0	0	0	1	1	0	0	1		TTAAAGCTTTATCTCCGTAATCTTCTTTTACTTTGGGTATAATTTGTTCTG
77739	'+'	1	1	7.64	2.8	43.83	1	CJE0062	2-amino-4-hydroxy-6-hydroxymethyldihydropteridine pyrophosphokinase	NA	474	0	0	0	1	1	0	0	1		TTAAAGCTTTATCTCCGTAATCTTCTTTTACTTTGGGTATAATTTGTTCTG
78770	'-'	1	1	2344.1	>100	10.71	2	CJE0063	3-dehydroquinate dehydratase	29	480	1	0	0	0	1	0	0	1		CAAAAATTACATTGTAGCAAAAATTTATTTTTAAAATGTTATAATAAAAGG
78770	'-'	1	1	2344.1	>100	10.71	2	CJE0064	chlorohydrolase	NA	1230	0	0	0	1	1	0	0	1		CAAAAATTACATTGTAGCAAAAATTTATTTTTAAAATGTTATAATAAAAGG
78815	'+'	1	1	385.31	3.1	12.56	2	CJE0064	chlorohydrolase	17	1230	1	0	0	0	1	0	0	1		TTTAACCTTTTATTATAACATTTTAAAAATAAATTTTTGCTACAATGTAAT
78815	'+'	1	1	385.31	3.1	12.56	2	CJE0063	3-dehydroquinate dehydratase	NA	480	0	0	0	1	1	0	0	1		TTTAACCTTTTATTATAACATTTTAAAAATAAATTTTTGCTACAATGTAAT
79497	'+'	1	1	5.93	16	2.5	1	CJE0064	chlorohydrolase	NA	1230	0	0	1	0	1	0	0	0		CAAAATTTACTAGTTAGTACGCATTTTTTAGAAAGTAAGGCTGAAAATATC
79729	'+'	1	0	1.7	3	1.08	1	CJE0064	chlorohydrolase	NA	1230	0	0	1	0	1	0	0	0		ATTGTGCATTTTCAAATCGCCTTTTAAGTCAAAAAAGCTTAGATTTAAAAA
80308	'+'	1	1	22.49	27.5	3.08	1	CJE0065	signal peptide peptidase SppA%2C 36K type	NA	897	0	0	1	0	1	0	0	0		TAAAAATGATAGCAATATTAAAGGAGTGCTTTTTGTTATAGACTCTCCTGG
80955	'+'	1	1	7.64	2.38	4.16	1	CJE0066	hypothetical protein	142	957	0	1	0	0	1	0	0	0		TCGCTTATAAAACTAATAGCAGTTTTATAAACGCTAGATAAAATATATAAA
81002	'+'	1	1	405.25	2.11	5.14	1	CJE0066	hypothetical protein	95	957	0	1	0	0	1	0	0	0		TAAATATTTTTATTTAATTTTTGTAATATTTTTATGGAATAATTATTTATA
81082	'-'	1	1	10.27	>100	10.36	1	CJE0066	hypothetical protein	NA	957	0	0	0	1	1	0	0	1		CCAACCCTTAGCTTTTAAGGCATTTACCATAGGCATGGTATCTTTTCTATA
82268	'-'	1	1	79.35	5.9	5.66	1	CjNC11	CjNC11	0	155	1	0	0	0	1	0	0	0		AAAAAATATTCAGAAAATTTCTAATTAACTATTTATGCGTTAAAATAATAA
82774	'+'	1	1	4.35	6.5	9.5	1	CJE0068	pseudo	NA	566	0	0	0	1	1	0	0	1		TTACTAAAATGTTCTTTCATATAGTTAAAAAGTTCTGTTAAAATTTCTTTG
82958	'-'	1	1	13.83	2.59	2.5	1	CJE0068	pseudo	98	566	1	0	0	0	1	0	0	0		ATAATTTCTAATTAATAATATTTTAATAAAATATTATGTAATATTTCACTC
85940	'-'	1	0	49.22	10.67	1.41	1	CJE0071	hypothetical protein	25	741	1	0	0	0	1	0	0	0		TTGTTAGAAATTTTACTTTGCTTTTATTTTTACAGGATTAGAATATTTATC
87750	'-'	1	1	2822.34	3.05	6.75	1	CJE0072	L-lactate permease	28	1698	1	0	0	0	1	0	0	0		TTACTCTATAATTCTTTTATTTTAATTTAATTTTTTGTTACAATAAATTTA
88397	'+'	1	1	15.01	20	2.66	1	CJE0073	cytolethal distending toxin%2C subunit C	NA	570	0	0	0	1	1	0	0	1		AATTCCCGTTTCTAAGCTTCTTATAGAAACCATTTCGGTAAAATCTTTCAA
88397	'+'	1	1	15.01	20	2.66	1	CJE0074	cytolethal distending toxin%2C subunit B	NA	798	0	0	0	1	1	0	0	1		AATTCCCGTTTCTAAGCTTCTTATAGAAACCATTTCGGTAAAATCTTTCAA
88553	'+'	1	1	11.46	4.8	7.72	1	CJE0073	cytolethal distending toxin%2C subunit C	NA	570	0	0	0	1	1	0	0	1		GATCTGAAACTATATGAGATCTTAAACTTGCAAGCATTAAAATTGCAGCTA
88553	'+'	1	1	11.46	4.8	7.72	1	CJE0074	cytolethal distending toxin%2C subunit B	NA	798	0	0	0	1	1	0	0	1		GATCTGAAACTATATGAGATCTTAAACTTGCAAGCATTAAAATTGCAGCTA
90106	'-'	1	1	4.24	4.33	>100	2	CJE0075	cytolethal distending toxin%2C subunit A	32	807	0	1	0	0	1	0	0	1		AAACATTTTTAAAAAGCGGAAAATTATAATGAAATTTATGTTATTATTTTC
90106	'-'	1	1	4.24	4.33	>100	2	CJE0076	hypothetical protein	NA	270	0	0	0	1	1	0	0	1		AAACATTTTTAAAAAGCGGAAAATTATAATGAAATTTATGTTATTATTTTC
90140	'+'	1	1	21.64	52	10.74	2	CJE0076	hypothetical protein	11	270	1	0	0	0	1	0	0	1		GTATTTAAATTTTTAAGAAAATAATAACATAAATTTCATTATAATTTTCCG
90140	'+'	1	1	21.64	52	10.74	2	CJE0075	cytolethal distending toxin%2C subunit A	NA	807	0	0	0	1	1	0	0	1		GTATTTAAATTTTTAAGAAAATAATAACATAAATTTCATTATAATTTTCCG
90720	'-'	1	1	3.95	>100	>100	1	CJE0077	cytochrome d ubiquinol oxidase%2C subunit I	NA	1563	0	0	0	1	1	0	0	1		AACATAACTGCAAAAAAAGTAGCCTCTAAAAAAAATGCCATAATACCTTCA
91471	'-'	1	1	24.19	4	14.61	1	CJE0077	cytochrome d ubiquinol oxidase%2C subunit I	NA	1563	0	0	0	1	1	0	0	1		AGTTTCTAAAATGGATTTGTGATTTGCCATAGCTATTGTATCATTGTTTTC
91475	'-'	1	1	3.82	4	>100	1	CJE0077	cytochrome d ubiquinol oxidase%2C subunit I	NA	1563	0	0	0	1	1	0	0	1		AATGAGTTTCTAAAATGGATTTGTGATTTGCCATAGCTATTGTATCATTGT
91956	'+'	1	1	9.48	2.71	2.19	2	CJE0078	cytochrome d ubiquinol oxidase%2C subunit II	27	1125	1	0	0	0	1	0	0	0		ATCATGCTTACTCAGATTAAAAAAGGTTTTGACGCACATGCAGGACATACT
91956	'+'	1	1	9.48	2.71	2.19	2	CJE0077	cytochrome d ubiquinol oxidase%2C subunit I	NA	1563	0	0	1	0	1	0	0	0		ATCATGCTTACTCAGATTAAAAAAGGTTTTGACGCACATGCAGGACATACT
92296	'-'	1	1	11.03	>100	37.59	1	CJE0078	cytochrome d ubiquinol oxidase%2C subunit II	NA	1125	0	0	0	1	1	0	0	1		CATAGGTTTTAGAGCCATAAACATTATTTTCTTTTTTGCGATATTCATAAG
92981	'+'	1	0	8.3	22	1.93	2	CJE0079	hypothetical protein	136	105	1	0	0	0	1	0	0	0		TTGCAAAGTTCTTTAACTTTAAAAAATGCAAGTTCAAGCTATTATACTCTA
92981	'+'	1	0	8.3	22	1.93	2	CJE0078	cytochrome d ubiquinol oxidase%2C subunit II	NA	1125	0	0	1	0	1	0	0	0		TTGCAAAGTTCTTTAACTTTAAAAAATGCAAGTTCAAGCTATTATACTCTA
93253	'+'	1	1	242.38	3.6	3.54	2	CjNC1	CjNC1	0	96	1	0	0	0	1	0	0	1		AAAAGATAGCAAACTATAAAGCAAGATAAGATTTAAACCGATATAAGTATA
93253	'+'	1	1	242.38	3.6	3.54	2	CJE0080	aspartate racemase%2C putative	NA	696	0	0	0	1	1	0	0	1		AAAAGATAGCAAACTATAAAGCAAGATAAGATTTAAACCGATATAAGTATA
94332	'-'	1	0	1.58	2.33	0.67	1	CJE0081	uracil-DNA glycosylase	NA	696	0	0	1	0	1	0	0	0		AGCCATAGTTCGTGGGGTTGGCAAGAATTTAGTGATGCTATAATACATAAA
94350	'+'	1	1	9.34	39	8.31	1	CJE0081	uracil-DNA glycosylase	NA	696	0	0	0	1	1	0	0	1		ATAAAAACAAGCCCTGATTTTTCATTACTTAATTTATGTATTATAGCATCA
94842	'-'	1	1	76.81	1.95	9.1	1	CJE0081	uracil-DNA glycosylase	31	696	1	0	0	0	1	0	0	0		TACTTCAAAAAAAATTAATATATTTTTGCAAGCTTTTTTGTTAGAATAAAA
95016	'+'	1	1	3.82	10	4.82	1	CJE0082	aspartate ammonia-lyase	66	1407	0	1	0	0	1	0	0	0		TTTGAAAGTAGTTTTCTTATTAACCAATTATTAACTAAAAATGCAATATCA
95024	'+'	1	1	4563.86	>100	6.39	1	CJE0082	aspartate ammonia-lyase	58	1407	1	0	0	0	1	0	0	0		TAGTTTTCTTATTAACCAATTATTAACTAAAAATGCAATATCATTATTTTA
97919	'+'	1	1	58.56	2.41	7.07	1	CJE0084	putative lipoprotein	29	1362	1	0	0	0	1	0	0	0		GTTAAATTTTTTTCATTAGTTTTTAAGTATATACTACGTTATAATATTCAT
100345	'+'	1	1	3.56	4	3.17	1	CJE0087	hypothetical protein	72	1338	1	0	0	0	1	0	0	0		TATTGATAAAACCGGTTCTAGTAAATCAGTTACTTGGTAAAATAAAAATTA
100603	'+'	1	1	7.21	4.4	2.65	1	CJE0087	hypothetical protein	NA	1338	0	0	1	0	1	0	0	0		CCCCAAAATCAATTGAAGATTTTTTTGAAGAATTTGCCGATAATTTCGGTA
101529	'+'	1	1	18.25	>100	6.97	2	CJE0088	hypothetical protein	235	1203	1	0	0	0	1	0	0	0		ACTCAAAACATAACAAATATTATTGATAAAGTAAATAGTAAAATAAAAGCA
101529	'+'	1	1	18.25	>100	6.97	2	CJE0087	hypothetical protein	NA	1338	0	0	1	0	1	0	0	0		ACTCAAAACATAACAAATATTATTGATAAAGTAAATAGTAAAATAAAAGCA
103044	'+'	1	1	21.22	>100	5.95	1	CJE0089	50S ribosomal protein L21	81	309	0	1	0	0	1	0	0	0		TCTAAACTCTTTCTTAAATTCATCAAAAATTAAAGAAAAATTTTGTAAAAT
103050	'+'	1	1	4154.37	50.95	7.29	1	CJE0089	50S ribosomal protein L21	75	309	1	0	0	0	1	0	0	0		CTCTTTCTTAAATTCATCAAAAATTAAAGAAAAATTTTGTAAAATCGAAAT
103090	'-'	1	1	16.55	32	5.39	1	CJE0089	50S ribosomal protein L21	NA	309	0	0	0	1	1	0	0	1		TGATAATAGCATACATTGCTTTTCCTTATAAATTGGTAGTACCATAAAGCA
103946	'-'	1	1	3.82	>100	7.67	1	CJE0091	GTPase ObgE	NA	1053	0	0	0	1	1	0	0	1		TAATTCTCTTTTGCCTTTGAAATTTACAAGAGTGTGGGTATTATTATCACA
104372	'+'	1	1	9.76	2.05	2.03	1	CJE0091	GTPase ObgE	NA	1053	0	0	1	0	1	0	0	0		CTCTTATAAGCGTTGTTTCAAATGCAAAACCTGAAATTGCAAATTATGAAT
105766	'+'	1	1	62.8	7.43	9.16	1	CJE0093	methionyl-tRNA formyltransferase	25	918	1	0	0	0	1	0	0	0		GATTAATTTATTAAATTCTCTTTTAAAATCAAATAAGCTATAATTAAAACT
107206	'+'	1	1	192.01	>100	2.44	2	CJE0095	ParA family chromosome partitioning ATPase	115	786	1	0	0	0	1	0	0	0		AAAAAAAATTTTATGGAAGAATATTTTTAGCAAGTATATGTTAGAATTTGA
107206	'+'	1	1	192.01	>100	2.44	2	CJE0094	biotin--protein ligase	NA	654	0	0	1	0	1	0	0	0		AAAAAAAATTTTATGGAAGAATATTTTTAGCAAGTATATGTTAGAATTTGA
108318	'-'	1	1	2.55	>100	>100	1	CJE0096	ParB family chromosome partitioning protein	NA	837	0	0	0	1	1	0	0	1		TCTCCAGCAATTAAAATAAATTTATTATTTTTTTTAAATACAATAATAGGC
108921	'+'	1	1	89.11	1.85	5.67	2	CJE0097	F0F1 ATP synthase subunit B%27	88	426	0	1	0	0	1	0	0	0		AAAAATAATGATTTTGTAATTCATTTAGAAAATATTGATAAAATTAAAAAA
108921	'+'	1	1	89.11	1.85	5.67	2	CJE0096	ParB family chromosome partitioning protein	NA	837	0	0	1	0	1	0	0	0		AAAAATAATGATTTTGTAATTCATTTAGAAAATATTGATAAAATTAAAAAA
108984	'+'	1	1	1005.28	4.83	6.83	1	CJE0097	F0F1 ATP synthase subunit B%27	25	426	1	0	0	0	1	0	0	0		CTTGAAAAGTTTTAACCAAAATCTTAGCTTTTTTATGGTAAAATAGTCCTT
110664	'+'	1	1	42.01	3.54	2.77	1	CJE0100	F0F1 ATP synthase subunit alpha	NA	1506	0	0	1	0	1	0	0	0		GGTATATGGACTTAAGAATATTATGGCTGGAGAAATGGTAGAATTTGAAAA
110960	'+'	1	1	55.31	6	3.12	1	CJE0100	F0F1 ATP synthase subunit alpha	NA	1506	0	0	1	0	1	0	0	0		GAAAAAGTGTTCATGAGCCTTTACATACAGGAATTAAAGCTATTGATGCGC
111034	'-'	1	1	7.51	>100	15.91	1	CJE0100	F0F1 ATP synthase subunit alpha	NA	1506	0	0	0	1	1	0	0	1		GCAACATATATACAGATAACTCCTTGACCTCTTTGAGATATAATAGTATCA
112712	'+'	1	1	219.39	33.31	4.79	2	CJE0102	F0F1 ATP synthase subunit beta	207	1398	1	0	0	0	1	0	0	0		AACTGAGCTTTTAGAAGATTTAATGAAAACGTATTTTGAGTATAATATGTA
112712	'+'	1	1	219.39	33.31	4.79	2	CJE0101	F0F1 ATP synthase subunit gamma	NA	885	0	0	1	0	1	0	0	0		AACTGAGCTTTTAGAAGATTTAATGAAAACGTATTTTGAGTATAATATGTA
114761	'+'	1	0	7.64	>100	1.66	1	CJE0104	MotA%2FTolQ%2FExbB proton channel family protein	NA	555	0	0	1	0	1	0	0	0		GAATTTTGAAGCTATATTTCATTTTTTCAATAGTTCAAGTATTATTACTTA
115605	'+'	1	1	6.79	9	2.07	2	CJE0106	TonB domain-containing protein	59	780	1	0	0	0	1	0	0	0		CGGTTTTTATACGCGCTGATAAAAGCTTAAAATATGACGATGTTATTTCAG
115605	'+'	1	1	6.79	9	2.07	2	CJE0105	TonB system transport protein ExbD%2C putative	NA	390	0	0	1	0	1	0	0	0		CGGTTTTTATACGCGCTGATAAAAGCTTAAAATATGACGATGTTATTTCAG
116618	'+'	1	0	20.37	17	1.19	1	CJE0107	translocation protein TolB	NA	1209	0	0	1	0	1	0	0	0		ATTCAAATTTAAGTGATGAGAATTTAAAGAAAAGCTTTTATAATATCATTG
117040	'-'	1	1	3.82	>100	13.01	1	CJE0107	translocation protein TolB	NA	1209	0	0	0	1	1	0	0	1		ATTTTACTAGCTTTATTGGTATTTAAATCATAACGGTATAAAGTTGGCTTA
117712	'+'	1	1	719.27	25.93	3.42	1	CJE0108	peptidoglycan-associated lipoprotein Omp18	26	498	1	0	0	0	1	0	0	0		AAATTTCAATTTTAGGTTAAAATTAATTAAAAATTAGATATAATAATAAGA
121248	'+'	1	1	118.39	5.98	5.43	2	CJE0113	PP-loop family protein	125	756	1	0	0	0	1	0	0	0		GTGAAATGGAAGGCGCAAGTGTGGCTTTGGTTTGTGATGCTTTAAAGGTGC
121248	'+'	1	1	118.39	5.98	5.43	2	CJE0112	5%27-methylthioadenosine%2FS-adenosylhomocysteine nucleosidase	NA	690	0	0	1	0	1	0	0	0		GTGAAATGGAAGGCGCAAGTGTGGCTTTGGTTTGTGATGCTTTAAAGGTGC
123769	'+'	1	1	144.7	8.93	3.8	1	CJE0117	hypothetical protein	27	690	1	0	0	0	1	0	0	0		ATATATGAGTAAAAATATTAAAAAAAATCATTTTTGCCGATTTACTTTAGA
124971	'-'	1	1	2.77	1.7	2.48	1	CJE0118	tRNA-dihydrouridine synthase B	NA	927	0	0	1	0	1	0	0	0		TTCGACTAGGATTTAATGAAAAATATCCTGAAAAAATGGCTAAAATTTGTG
125435	'+'	1	1	4.24	>100	14.46	1	CJE0118	tRNA-dihydrouridine synthase B	NA	927	0	0	0	1	1	0	0	1		AAAAACCTGCCATAGGGGCTAAAAACAGGGGTTTTTTGCTAAAATCTATCA
125435	'+'	1	1	4.24	>100	14.46	1	CJE0119	hypothetical protein	NA	987	0	0	0	1	1	0	0	1		AAAAACCTGCCATAGGGGCTAAAAACAGGGGTTTTTTGCTAAAATCTATCA
125587	'+'	1	1	3.95	>100	3.65	1	CJE0119	hypothetical protein	NA	987	0	0	0	1	1	0	0	1		TTAACTCATCTAAAAGTCCAAATTCAGCCAAAAGATATAAATATGCTCTTA
125789	'-'	1	1	23.31	>100	2.94	1	CJE0119	hypothetical protein	NA	987	0	0	1	0	1	0	0	0		TAGAAAAAGCTAGTTATGAGCAAATTAAAAATGTAAAAATCCCTAAAAAGC
125919	'+'	1	1	4.74	>100	9.5	1	CJE0119	hypothetical protein	NA	987	0	0	0	1	1	0	0	1		TCATCTTTGATTTCATTAAGGTTTTTAAGTTTGTTATAGGCATAATTTGCA
126539	'-'	1	1	12.73	26	2.73	2	CJE0119	hypothetical protein	120	987	1	0	0	0	1	0	0	0		TCTCAAAGAAGAACTTATAGAAATCGAAGATTCTTTAGATAAAATCAAAAA
126539	'-'	1	1	12.73	26	2.73	2	CJE0120	dnaK suppressor protein%2C putative	NA	363	0	0	1	0	1	0	0	0		TCTCAAAGAAGAACTTATAGAAATCGAAGATTCTTTAGATAAAATCAAAAA
127495	'+'	1	1	1.7	>100	6.58	1	CJE0122	acetyl-CoA carboxylase subunit beta	NA	843	0	0	0	1	1	0	0	1		GCAAAAGAAGCACTTACTCCACCCATAGTAGGATCGGTTAAAATGCTAATA
128104	'-'	1	1	305.53	28.67	7.25	2	CJE0122	acetyl-CoA carboxylase subunit beta	28	843	1	0	0	0	1	0	0	0		AAATTTCCTTCTCCTAAGCCAAGACAAAAAAATTTTTGATATAATCTTAGA
128104	'-'	1	1	305.53	28.67	7.25	2	CJE0123	inositol monophosphatase family protein	NA	723	0	0	1	0	1	0	0	0		AAATTTCCTTCTCCTAAGCCAAGACAAAAAAATTTTTGATATAATCTTAGA
128642	'-'	1	1	5.94	3	3.01	1	CJE0123	inositol monophosphatase family protein	NA	723	0	0	1	0	1	0	0	0		AAGGCTATGAGCTTGACTTAAAATGTGAACAAATTTTCATAAAATATCTTA
128692	'-'	1	0	3.56	>100	1.16	1	CJE0123	inositol monophosphatase family protein	NA	723	0	0	1	0	1	0	0	0		CCCACAAAATGATCTTAAACTTTGCTCTAAATTAGGCTATGATAAAAATCA
129488	'+'	1	1	23.13	>100	15.76	1	CJE0124	OMP85 family outer membrane protein	NA	2220	0	0	0	1	1	0	0	1		GGACTTAAGTGATATATATCGCTTTGTTCAAGATTATAAGTTAAGCTTACA
131055	'-'	1	1	263.52	2.09	10.93	2	CJE0124	OMP85 family outer membrane protein	29	2220	1	0	0	0	1	0	0	1		CATACTTTCTACCTTAGTTTTTTTGTTAAATTTTTTTTGCTATTATACAGC
131055	'-'	1	1	263.52	2.09	10.93	2	CJE0125	prephenate dehydrogenase	NA	828	0	0	0	1	1	0	0	1		CATACTTTCTACCTTAGTTTTTTTGTTAAATTTTTTTTGCTATTATACAGC
131295	'+'	1	1	54.74	4.52	4.63	1	CJE0125	prephenate dehydrogenase	NA	828	0	0	1	0	1	0	0	0		ATGAGCTTATAGAATTTAAAGATTTAGCTTTATGTGATATGATTTTTGTCG
131306	'-'	1	1	39.51	15.29	>100	2	CJE0124	OMP85 family outer membrane protein	280	2220	0	1	0	0	1	0	0	1		ACATTAGAAGGCAAATCAACTAACTTTTGCAAAATTGCTATAATAGCATCA
131306	'-'	1	1	39.51	15.29	>100	2	CJE0125	prephenate dehydrogenase	NA	828	0	0	0	1	1	0	0	1		ACATTAGAAGGCAAATCAACTAACTTTTGCAAAATTGCTATAATAGCATCA
131354	'-'	1	1	1.58	>100	>100	1	CJE0125	prephenate dehydrogenase	NA	828	0	0	0	1	1	0	0	1		AAACTTTCTATAATTTTTCTTTTTGTACTTCCAAGCTCTATAATTGTTACA
131946	'-'	1	1	9.34	5	10.12	1	CJE0125	prephenate dehydrogenase	NA	828	0	0	0	1	1	0	0	1		AATTTTCAATGTTTTTGTTGCTTTTAATATAAATTCTATTATATTTTCAGT
131946	'-'	1	1	9.34	5	10.12	1	CJE0126	M24%2FM37 family peptidase	NA	1374	0	0	0	1	1	0	0	1		AATTTTCAATGTTTTTGTTGCTTTTAATATAAATTCTATTATATTTTCAGT
131972	'+'	1	1	320.38	7.4	5.45	1	CJE0126	M24%2FM37 family peptidase	38	1374	1	0	0	0	1	0	0	0		ATTTTATAAATTTGCTAGATATTTACTGAAAATATAATAGAATTTATATTA
132264	'-'	1	1	9.76	>100	>100	1	CJE0126	M24%2FM37 family peptidase	NA	1374	0	0	0	1	1	0	0	1		CCAAATTTTGGCAAAGCAACTTGTAAGGTAATATCTTTTAAATTAGAAATC
133958	'+'	1	1	221.64	45	4.25	1	CJE0127	UDP-3-O-%5B3-hydroxymyristoyl%5D N-acetylglucosamine deacetylase	NA	885	0	0	1	0	1	0	0	0		TATATAGAAAACATAGCAAGGGCTAGAACTTTTGGTTTTTTAAAAGATGTT
134684	'+'	1	1	47.53	12.2	6.27	2	CJE0129	homoserine kinase	32	879	1	0	0	0	1	0	0	0		TTTTACCAAAAAATTTACAAGAGCTTAAACTAAATAATGATAATCTTCCCT
134684	'+'	1	1	47.53	12.2	6.27	2	CJE0128	hypothetical protein	NA	402	0	0	1	0	1	0	0	0		TTTTACCAAAAAATTTACAAGAGCTTAAACTAAATAATGATAATCTTCCCT
135622	'+'	1	1	27.58	>100	2.54	2	CJE0131	translation initiation factor IF-2	241	2616	0	1	0	0	1	0	0	0		ATAATGGCTTTGAAATTTGCTAAAAAATATAAAAAAAAGATATAATTTTGA
135622	'+'	1	1	27.58	>100	2.54	2	CJE0130	hypothetical protein	NA	258	0	0	1	0	1	0	0	0		ATAATGGCTTTGAAATTTGCTAAAAAATATAAAAAAAAGATATAATTTTGA
135823	'+'	1	1	20.37	13	3.29	2	CJE0131	translation initiation factor IF-2	40	2616	1	0	0	0	1	0	0	0		AAGATAAAGTCTTACAAAAAGCATTTTCTAAAATATGTAAAAATTTAAATA
135823	'+'	1	1	20.37	13	3.29	2	CJE0130	hypothetical protein	NA	258	0	0	1	0	1	0	0	0		AAGATAAAGTCTTACAAAAAGCATTTTCTAAAATATGTAAAAATTTAAATA
140427	'+'	1	1	34.8	17.4	5.61	1	CJE0134	McrBC restriction endonuclease system%2C McrB subunit%2C putative	NA	1989	0	0	1	0	1	0	0	0		ATAGAAAAAATTCAAAGTGGTGGATTTAAATTAGAAGAATATAATGAAAAA
141285	'+'	1	1	4.74	5	2.99	2	CJE0135	hypothetical protein	50	1332	1	0	0	0	1	0	0	0		ATTTATAATATTGCTTCATTTGATGATAAAATTTGGGATAAAATAGAAATA
141285	'+'	1	1	4.74	5	2.99	2	CJE0134	McrBC restriction endonuclease system%2C McrB subunit%2C putative	NA	1989	0	0	1	0	1	0	0	0		ATTTATAATATTGCTTCATTTGATGATAAAATTTGGGATAAAATAGAAATA
141505	'-'	1	1	5.09	>100	3.65	1	CJE0135	hypothetical protein	NA	1332	0	0	0	1	1	0	0	1		CATTTTGGCAAAATCTCCAAAACCCCGCTTTTAGTCTGTATAATGCCGACA
142396	'+'	1	1	18.17	>100	2.59	1	CJE0135	hypothetical protein	NA	1332	0	0	1	0	1	0	0	0		AATTGTTTCATGTTAAAGCCTGATTTATATATAGAAAATAAAATGATCCTA
142838	'+'	1	1	3.95	>100	4.38	1	CJE0136	cation ABC transporter%2C permease protein	NA	804	0	0	0	1	1	0	0	1		AAACTTGCCAAAATCATGATAAAGCCAAGTCTTTTGGTAAAATTTTCAGCA
145234	'-'	1	1	82.18	3.6	3.59	1	CJE0138	cation ABC transporter%2C periplasmic cation-binding protein	26	891	1	0	0	0	1	0	0	0		AAATATCGCTTCGAAAATTCTATGTATTAAGCTTAATATCGTTATAATTTA
145257	'+'	1	1	8.3	22	6.36	2	CJE0139	hypothetical protein	220	330	1	0	0	0	1	0	0	1		AAAATATTTCCTTCGATATAAATTTTTTAAATTATAACGATATTAAGCTTA
145257	'+'	1	1	8.3	22	6.36	2	CJE0138	cation ABC transporter%2C periplasmic cation-binding protein	NA	891	0	0	0	1	1	0	0	1		AAAATATTTCCTTCGATATAAATTTTTTAAATTATAACGATATTAAGCTTA
145392	'+'	1	1	5.52	>100	2.63	1	CJE0139	hypothetical protein	85	330	0	1	0	0	1	0	0	0		ATCACTTTTATATTTAAGTAAAAATTTAGATTTTTTAATTTATAATTCTTA
145410	'-'	1	1	8.91	2.4	3.95	2	CJE0138	cation ABC transporter%2C periplasmic cation-binding protein	202	891	0	1	0	0	1	0	0	1		TTAATTAATTTTTGTAAAAGAACTTTTAACATTAATTTTATAAAATATAAA
145410	'-'	1	1	8.91	2.4	3.95	2	CJE0139	hypothetical protein	NA	330	0	0	0	1	1	0	0	1		TTAATTAATTTTTGTAAAAGAACTTTTAACATTAATTTTATAAAATATAAA
146445	'-'	1	1	3.39	>100	7.81	1	CJE0140	methyl-accepting chemotaxis protein	NA	1623	0	0	0	1	1	0	0	1		TACTTCTATAGTAGAAACATTTTTTGTTTTATAGTTGATAAAATCAAAGAA
147898	'-'	1	1	3.18	>100	>100	1	CJE0141	hypothetical protein	NA	1782	0	0	0	1	1	0	0	1		AACATGATTTCAGGATTTATATATTCATTATTAACAGCTAAAATTCCTCTG
149248	'+'	1	1	4.24	10	3.65	1	CJE0141	hypothetical protein	NA	1782	0	0	1	0	1	0	0	0		TGTGAATTAACAGGGATTGCTTTTAGTGAGGATTATACTACAATGTTTGTA
149699	'-'	1	0	11.88	5	1.81	1	CJE0142	thioredoxin-disulfide reductase	NA	939	0	0	1	0	1	0	0	0		TCATTACTAGCGCAAGTGTAGATGAAGTATATGGTGATAAAATGGGTGTTA
150369	'-'	1	1	384.46	93.25	7	1	CJE0142	thioredoxin-disulfide reductase	31	939	1	0	0	0	1	0	0	0		AATAATAATTTTTATTAACTACTATTAAGAATAATTTTTATATCATTATTA
153509	'-'	1	1	26.87	2.7	2.34	1	CJE0146	aspartate aminotransferase	NA	1203	0	0	1	0	1	0	0	0		ATGGCAGCAAGACGTGCTGGAGAGGATATCATCGACTTTTCAATGGGAAAT
156060	'-'	1	1	1518.67	17.68	6.59	1	CJE0149	RNA methyltransferase	0	684	1	0	0	0	1	0	0	0		AGAAATTTATCAAAAACTGCTTTTAAGTCAAGATTAGGTAAAATTTTAATA
156461	'+'	1	1	6.79	6.33	21.92	1	CJE0150	tetrapyrrole methylase family protein	NA	825	0	0	0	1	1	0	0	1		TAAATAATACTTGGATAAGGAAAGTTTAAAATTTTTTCTATATCTTTTTGT
157129	'-'	1	1	547.83	24.29	7.42	1	CJE0151	50S ribosomal protein L31	28	201	1	0	0	0	1	0	0	0		CTTTTCTTAAATTAATCTCTTTTTTATGTTAAATAATTTATAATCACGGCT
157219	'+'	1	1	9.76	2.77	7.06	1	CJE0152	16S ribosomal RNA methyltransferase RsmE	NA	657	0	0	0	1	1	0	0	1		TTTAAGAAAAGTTAAAGCAAAATTTTTGAAGCTATAGCTATAATAGCTGTT
159278	'-'	1	1	562.69	5.06	6.9	2	CJE0155	6-pyruvoyl tetrahydrobiopterin synthase-like protein	27	582	1	0	0	0	1	0	0	0		GCTGAATTTTGTATTAAGAATGGTTATAATTATTCTGATAGAATTCATATT
159278	'-'	1	1	562.69	5.06	6.9	2	CJE0156	radical SAM domain-containing protein	NA	744	0	0	1	0	1	0	0	0		GCTGAATTTTGTATTAAGAATGGTTATAATTATTCTGATAGAATTCATATT
159292	'-'	1	1	72.14	>100	3.18	2	CJE0155	6-pyruvoyl tetrahydrobiopterin synthase-like protein	41	582	0	1	0	0	1	0	0	0		ATGCTCAAAAAATTGCTGAATTTTGTATTAAGAATGGTTATAATTATTCTG
159292	'-'	1	1	72.14	>100	3.18	2	CJE0156	radical SAM domain-containing protein	NA	744	0	0	1	0	1	0	0	0		ATGCTCAAAAAATTGCTGAATTTTGTATTAAGAATGGTTATAATTATTCTG
162877	'+'	1	1	4.67	4.67	>100	2	CJE0161	tRNA delta%282%29-isopentenylpyrophosphate transferase	47	870	1	0	0	0	1	0	0	1		TTTAAATTTTATCCAGAATGTGTTCATTTTTCTACTTTAAAATATTTTTTG
162877	'+'	1	1	4.67	4.67	>100	2	CJE0160	prenyltransferase	NA	885	0	0	0	1	1	0	0	1		TTTAAATTTTATCCAGAATGTGTTCATTTTTCTACTTTAAAATATTTTTTG
164373	'-'	1	1	6.79	3.67	10.96	1	CJE0162	hypothetical protein	31	564	1	0	0	0	1	0	0	0		AATATATCAAAATTATGTGATTTTTATCTTTGTTTAATTATAATTTCATCT
164462	'+'	1	1	262.33	3.18	5.72	1	CJE_tRNA-Glu-1	tRNA-Glu	28	75	1	0	0	0	1	0	0	0		TTTTGATATATTTAATTAAATTTTAAGAAATAAATATATATAATTCAATTT
164655	'+'	1	1	210.9	8.65	6.5	1	CJE0163	hypothetical protein	NA	183	0	0	0	1	1	0	0	1		TTCTATTGAAATTTAATAAATATTAATAATTTATTTTGTAGAATACGAATA
164913	'-'	1	1	224.48	>100	6.5	1	CJE0163	hypothetical protein	31	183	1	0	0	0	1	0	0	0		ATTTTTACAAAAATATCTATTTGTTGATTTTTAATAATTACAATTAATTTG
165118	'+'	1	1	335.66	9.22	4.39	1	CJE0164	superoxide dismutase%2C Fe	28	663	1	0	0	0	1	0	0	0		GCTTTTAAGATATTTTTACTCTTTTTAATATTATTATGGTAATATTTTCAA
166364	'+'	1	1	50.92	>100	9.64	1	CJE0165	saccharopine dehydrogenase	NA	1206	0	0	0	1	1	0	0	1		CCTTTGATATTTTTTACCAAGCTTTCAAGTTCTTCATGATAAAGTAAATAG
167165	'-'	1	1	20.79	11.33	3.1	2	CJE0165	saccharopine dehydrogenase	124	1206	1	0	0	0	1	0	0	0		AATTTTACAAAAAGAATTTTTAGGGGCTTTTTGTAGGCTAAAATTACTTTA
167165	'-'	1	1	20.79	11.33	3.1	2	CJE0166	iron ABC transporter%2C ATP binding subunit	NA	909	0	0	1	0	1	0	0	0		AATTTTACAAAAAGAATTTTTAGGGGCTTTTTGTAGGCTAAAATTACTTTA
167350	'+'	1	1	4.74	>100	26.3	1	CJE0166	iron ABC transporter%2C ATP binding subunit	NA	909	0	0	0	1	1	0	0	1		TCTAAATCAAGTTTTTCTTCTATGATATTTAAATCAGGTAAAATTTGTGCA
168158	'-'	1	1	19.94	3.6	5.15	2	CJE0166	iron ABC transporter%2C ATP binding subunit	167	909	1	0	0	0	1	0	0	0		CATTTTTTATTTTTAGCTTTTATTATTGTTTTTATTGATACGATTAAAGAA
168158	'-'	1	1	19.94	3.6	5.15	2	CJE0167	iron ABC transporter%2C permease protein	NA	1617	0	0	1	0	1	0	0	0		CATTTTTTATTTTTAGCTTTTATTATTGTTTTTATTGATACGATTAAAGAA
168221	'-'	1	1	5.52	2.3	6.65	2	CJE0166	iron ABC transporter%2C ATP binding subunit	230	909	0	1	0	0	1	0	0	0		AGTTTAAATTTAAGAACGAGTTATTTTATTTTATTTTTTAAAATTCACACA
168221	'-'	1	1	5.52	2.3	6.65	2	CJE0167	iron ABC transporter%2C permease protein	NA	1617	0	0	1	0	1	0	0	0		AGTTTAAATTTAAGAACGAGTTATTTTATTTTATTTTTTAAAATTCACACA
168292	'-'	1	0	2.12	3.5	1.95	1	CJE0167	iron ABC transporter%2C permease protein	NA	1617	0	0	1	0	1	0	0	0		GTTTTTTAGCGAGTGCAATTTATTCTTTAGAAGGAGGATATAATAAAATTC
168454	'-'	1	1	4.67	>100	2.27	1	CJE0167	iron ABC transporter%2C permease protein	NA	1617	0	0	1	0	1	0	0	0		TTTTTAATTTATTTATTTTAAAAATAAGTTCTTTGGGTTATTCTATACCTG
169489	'+'	1	1	1.98	4	3.95	1	CJE0167	iron ABC transporter%2C permease protein	NA	1617	0	0	0	1	1	0	0	1		TTCTTTAATAGATGAAAATTGGGTTAAATCACTTGTATTAAAATTTTGAAA
169657	'+'	1	1	9.34	>100	33.26	1	CJE0167	iron ABC transporter%2C permease protein	NA	1617	0	0	0	1	1	0	0	1		TCATCGTAAATTTTAACCGCTTCTTTAATATTTTCTGCTATCTTACTCACA
169657	'+'	1	1	9.34	>100	33.26	1	CJE0168	iron ABC transporter%2C periplasmic iron-binding protein	NA	1005	0	0	0	1	1	0	0	1		TCATCGTAAATTTTAACCGCTTCTTTAATATTTTCTGCTATCTTACTCACA
170746	'-'	1	1	181.62	>100	5.62	2	CJE0168	iron ABC transporter%2C periplasmic iron-binding protein	151	1005	1	0	0	0	1	0	0	0		ATAAAATTATTAAGTTACTTTATATTTACTTTTTAATATTAATATTTCTTA
170746	'-'	1	1	181.62	>100	5.62	2	CJE0169	hypothetical protein	NA	210	0	0	1	0	1	0	0	0		ATAAAATTATTAAGTTACTTTATATTTACTTTTTAATATTAATATTTCTTA
170992	'+'	1	1	3.16	5	4.02	1	CJE0170	TonB-dependent colicin lipoprotein%2C putative	NA	852	0	0	1	0	1	0	0	0		ATAATGAAATTTTATACTATTTTAAGCATTCTATTTATAAGCTTTATGTTG
173044	'+'	1	1	11.06	18	8.22	1	CJE0171	TonB-dependent colicin receptor protein%2C putative	NA	2268	0	0	1	0	1	0	0	0		TTTTTACTTATTATCTTGATAATAGTCTAAATTATGGTATCTTTACACTTG
173393	'-'	1	1	19.52	47	20.6	1	CJE0171	TonB-dependent colicin receptor protein%2C putative	NA	2268	0	0	0	1	1	0	0	1		GATAAAATTGTTCATTATAAATATAATCTTTTATTTTTGTATGATAATACA
173543	'+'	1	1	4.24	>100	14.46	1	CJE0171	TonB-dependent colicin receptor protein%2C putative	NA	2268	0	0	1	0	1	0	0	0		AAATTCAGCTGATGATACCATATTTAAGGGTGTGGAGTTAGAATTAAGCTA
173718	'+'	1	1	8.06	10.5	13.01	1	CJE0171	TonB-dependent colicin receptor protein%2C putative	NA	2268	0	0	1	0	1	0	0	0		GATTATGCAAATGTAGAGCTTGGCTTTAGGTTAAATGATAAAATAAGCTTT
173837	'-'	1	1	5.52	2.18	3.37	1	CJE0171	TonB-dependent colicin receptor protein%2C putative	NA	2268	0	0	0	1	1	0	0	1		TGAGGTTTTTAAACCATTCTATATTCCAATATAAATCTACTATAATAGGAA
174120	'+'	1	1	4.24	>100	17.53	1	CJE0172	TonB system transport protein ExbB	NA	762	0	0	1	0	1	0	0	0		AAATGTTAAAAAAAATATTTTTATTTTGTTTTTTATTGTTAAATTTAAATG
174807	'+'	1	1	5.53	>100	10.23	2	CJE0173	biopolymer ExbD%2FTolR family transporter	13	411	1	0	0	0	1	0	0	0		TTATGCACCATTTAGATGAGCTTGCAAATTTTGTCTATATACTTTTTCATA
174807	'+'	1	1	5.53	>100	10.23	2	CJE0172	TonB system transport protein ExbB	NA	762	0	0	1	0	1	0	0	0		TTATGCACCATTTAGATGAGCTTGCAAATTTTGTCTATATACTTTTTCATA
175288	'+'	1	1	151.49	90.25	6.31	1	CJE0174	TonB-dependent colicin receptor protein%2C putative	NA	747	0	0	1	0	1	0	0	0		TCTAGTGTGATTTTTGGGTTTGTGTTAAGTTTGATATTGCATACTTTAGTA
175747	'+'	1	1	4.67	12	7.67	2	CJE0175	putative transporter	283	1200	0	1	0	0	1	0	0	0		GCTCATTTGACTAAATTTAAAAAATATCCTCAAGAAGCGATAATGCAAAAA
175747	'+'	1	1	4.67	12	7.67	2	CJE0174	TonB-dependent colicin receptor protein%2C putative	NA	747	0	0	1	0	1	0	0	0		GCTCATTTGACTAAATTTAAAAAATATCCTCAAGAAGCGATAATGCAAAAA
176013	'+'	1	1	208.89	1.93	9.81	1	CJE0175	putative transporter	17	1200	1	0	0	0	1	0	0	0		TTTAGGTAAAAAATAAACTTTTCATTAAAAAAAGTTTATTAGAATTTTTAT
176349	'+'	1	0	8.3	8	1.42	1	CJE0175	putative transporter	NA	1200	0	0	1	0	1	0	0	0		TATCAATAAAGGTGCATTGTATTATTATCAAAATTTATTAGAATATTTTTT
176464	'+'	1	1	14	2.89	3.17	1	CJE0175	putative transporter	NA	1200	0	0	1	0	1	0	0	0		GTTTTTTTGGCTATTGCTATTCCTTATGTTTTAATCGCTACAATTAATATC
177299	'+'	1	1	2041.96	3.62	5.66	1	CJE0176	transporter%2C putative	101	1287	1	0	0	0	1	0	0	0		AGAAAAAATTCAAATATTAAATTTACTTTTAATTGTGTATAATAAGGTTTA
180645	'+'	1	1	5.53	>100	>100	1	CJE0179	TerC family integral membrane protein	NA	720	0	0	0	1	1	0	0	1		GTTACAAGTTTCATTACCCAAAAAAGAGATAAAAGAAGTAAAATTCTTGTA
180848	'-'	1	1	33.52	8	11.69	1	CJE0179	TerC family integral membrane protein	33	720	1	0	0	0	1	0	0	0		ATTTTTTCTTAAAGAATTAAAGGTATTTGCTTTAAAACTATAAAATATCGC
181010	'+'	1	1	21.64	>100	11.23	1	CJE0180	phosphoribosylglycinamide formyltransferase	NA	567	0	0	0	1	1	0	0	1		TCAAAACTCAAATTTCTTTTTTCAAAAGCTTTTTGAGCTATAATCATTCCA
181223	'-'	1	0	2.55	>100	1.64	1	CJE0180	phosphoribosylglycinamide formyltransferase	NA	567	0	0	1	0	1	0	0	0		GTTGATCATAAGGCTTATAATACTCGTGAAGAATTTGATACGATTTTGGTA
181637	'-'	1	1	2.97	2.17	7.67	2	CJE0180	phosphoribosylglycinamide formyltransferase	184	567	1	0	0	0	1	0	0	0		AAATCCTATTATTGTGCAAAAAGAAAAATTATTTGTTGTAAATTTAGGAAA
181637	'-'	1	1	2.97	2.17	7.67	2	CJE0181	hypothetical protein	NA	1371	0	0	1	0	1	0	0	0		AAATCCTATTATTGTGCAAAAAGAAAAATTATTTGTTGTAAATTTAGGAAA
182106	'-'	1	1	4.24	2.43	2.23	1	CJE0181	hypothetical protein	NA	1371	0	0	1	0	1	0	0	0		TAGATAGAAAAATCAACGCCAATAAAGGAAATTTTGGCCATATTTATATAG
182453	'-'	1	0	4.24	6	1.02	1	CJE0181	hypothetical protein	NA	1371	0	0	1	0	1	0	0	0		ATTTTGTCAAAAGGAGCCTAATTTTAAAAAATTTCATATTATCATTGATTG
183617	'-'	1	1	20.37	2.44	6.47	2	CJE0182	hypothetical protein	121	699	0	1	0	0	1	0	0	0		AAAAAGATGCCAAAGATACGCTAGATTTAGCAATTTCACGTTATAATCTTT
183617	'-'	1	1	20.37	2.44	6.47	2	CJE0183	Mg chelatase-related protein	NA	1506	0	0	1	0	1	0	0	0		AAAAAGATGCCAAAGATACGCTAGATTTAGCAATTTCACGTTATAATCTTT
184608	'+'	1	1	33.1	43	8.57	1	CJE0183	Mg chelatase-related protein	NA	1506	0	0	0	1	1	0	0	1		TAAACCTCTAAATTTGGTATCATGGAAGCTTTTTGTGCTATACTTTTTGGA
185701	'+'	1	1	6.12	>100	3.31	1	CJE0185	ATP-dependent Clp protease proteolytic subunit	NA	585	0	0	0	1	1	0	0	1		TTTGCTATTTTTGCAACTTTTTGCTTAGTATTTTTTGCCAAAATATCATTA
185903	'-'	1	1	126.43	46.71	2.18	1	CJE0185	ATP-dependent Clp protease proteolytic subunit	NA	585	0	0	1	0	1	0	0	0		TCCAGGTGGTGTAATTACAAGTGGTTTTAGTATTTATGATACTATGAACTA
186028	'+'	1	1	1.98	>100	13.15	1	CJE0185	ATP-dependent Clp protease proteolytic subunit	NA	585	0	0	0	1	1	0	0	1		TTTGTAGGATCTTCAGCTTCTAAAAAAAGAAGTTGTGCTACGATAGAAGCG
187401	'+'	1	1	2.97	>100	>100	2	CJE0187	GTP cyclohydrolase I	224	573	0	1	0	0	1	0	0	1		AACCCATCCATTTTTACACTTTTAGAAGCTTTTTTTGCTAAATTTTCTACT
187401	'+'	1	1	2.97	>100	>100	2	CJE0186	trigger factor	NA	1335	0	0	0	1	1	0	0	1		AACCCATCCATTTTTACACTTTTAGAAGCTTTTTTTGCTAAATTTTCTACT
187510	'-'	1	1	55.17	66	4.61	1	CJE0186	trigger factor	29	1335	1	0	0	0	1	0	0	0		TACTTTAAAATTTTATGCAAGTAATAAGGAAAAATTTGCTATCATTGAAGG
187581	'+'	1	1	440.47	10.61	9.3	2	CJE0187	GTP cyclohydrolase I	44	573	1	0	0	0	1	0	0	1		TCCTTATTACTTGCATAAAATTTTAAAGTAATTTATGATAAAATTGCAATA
187581	'+'	1	1	440.47	10.61	9.3	2	CJE0186	trigger factor	NA	1335	0	0	0	1	1	0	0	1		TCCTTATTACTTGCATAAAATTTTAAAGTAATTTATGATAAAATTGCAATA
189266	'-'	1	1	39.04	4.07	11.76	1	CJE0188	flagellum-specific ATP synthase	NA	1386	0	0	0	1	1	0	0	1		GCTTAAATTTTCTTGCCCAAAGTTTATGTTCAGGACTTATAATGTCACTCA
191356	'-'	1	0	10.67	7.75	1.89	1	CJE0190	dihydrodipicolinate reductase	NA	729	0	0	1	0	1	0	0	0		ATTTTACATTTGATGCAAAGTGCTAGTGAAGTGATGCCGATTTTTTATGCG
191674	'-'	1	1	287.71	2.57	9.13	1	CJE0190	dihydrodipicolinate reductase	22	729	1	0	0	0	1	0	0	0		TAAAGCTTAATTTTATTATTTAAAATTTACAAAATAAATGCTAAAATCAAT
193197	'+'	1	1	3.39	>100	5.78	1	CJE0192	hypothetical protein	NA	1128	0	0	0	1	1	0	0	1		GAATTAAATTTTGTATTTCTAGATCAAGATTTTTTTGAATAAAATGAGAGA
193974	'+'	1	1	9.34	9	6.58	1	CJE0192	hypothetical protein	NA	1128	0	0	0	1	1	0	0	1		TAAATTTATTAAATAAAAGTTCGTTAGTGTATCCTATATAAAATATATGAA
194045	'-'	1	1	21.85	2.03	6.16	1	CJE0192	hypothetical protein	22	1128	1	0	0	0	1	0	0	0		AAATAAAAATTTAAACTCTTTTTTAACAAGCAATTTATAAAATAACACTTA
194528	'-'	1	1	1476.31	>100	6.53	1	CJE0193	hypothetical protein	24	348	1	0	0	0	1	0	0	0		AAAATTTTTAATTTCACATTCACTTCACTTAAAAATTTTATAATGTCATCA
195578	'-'	1	1	72.99	10.05	7.79	1	CJE0195	hypothetical protein	78	324	1	0	0	0	1	0	0	0		TATAAACAAGAATAAAAAAATAATTTTGAATTATTTTGCTATAATTATGAA
195637	'+'	1	1	14	>100	8.14	1	CJE0196	pseudo	107	1345	1	0	0	0	1	0	0	0		ATAGCAAAATAATTCAAAATTATTTTTTTATTCTTGTTTATAATGGTTACA
196333	'-'	1	1	2.97	3.33	7.12	1	CJE0196	pseudo	NA	1345	0	0	0	1	1	0	0	1		CAAAAGAAGGGATAATACTAAACCTACAATCTGAATAGGTATAATATGGCG
196998	'-'	1	1	6.37	2.15	8.1	1	CJE0196	pseudo	NA	1345	0	0	0	1	1	0	0	1		ATACTTATACCCCATATATAAAAAAAGCTTCTTTTGATATGATCTTTAATA
197193	'+'	1	1	29.28	2.19	12.78	1	CJE0197	OPT family oligopeptide transporter	80	1995	1	0	0	0	1	0	0	0		TTTTGAGTCAAAAATTTATAAAAATATAAGCGTTTTTTTGTATTATTTTAT
198162	'+'	1	1	9.76	8	2.34	1	CJE0197	OPT family oligopeptide transporter	NA	1995	0	0	1	0	1	0	0	0		ACCCGTTATTGAAGGTATTAAAGAAATTGTTAAAAATGTTAAAATTACTAA
198316	'+'	1	1	29.28	3.09	3.88	1	CJE0197	OPT family oligopeptide transporter	NA	1995	0	0	1	0	1	0	0	0		GTTGAAGATGCTAACTTAAGTATTTATTATCAAATGCTATTTTCATTTGTT
198982	'+'	1	1	11.46	5.14	2.25	1	CJE0197	OPT family oligopeptide transporter	NA	1995	0	0	1	0	1	0	0	0		CCTGCTGTAAATATACCTTTAGTTATAGGCGGAATTTTAAAATATATTGTA
199081	'+'	1	0	9.76	8.67	0.86	2	CJE0198	undecaprenol kinase%2C putative	260	804	0	1	0	0	1	0	0	0		AAACTTGCAAGTTGTGAGCAAAGAGGCACGCTTTTTGCTTCAGGGCTTATA
199081	'+'	1	0	9.76	8.67	0.86	2	CJE0197	OPT family oligopeptide transporter	NA	1995	0	0	1	0	1	0	0	0		AAACTTGCAAGTTGTGAGCAAAGAGGCACGCTTTTTGCTTCAGGGCTTATA
200066	'-'	1	1	16.2	3.93	5.48	1	CJE0198	undecaprenol kinase%2C putative	NA	804	0	0	0	1	1	0	0	1		AAAATCCCACTATAATACAAATAAAAGAAAACAAATCCTAAAATAATACGA
200224	'+'	1	1	2.55	7	2.82	1	CJE0199	threonyl-tRNA synthetase	51	1809	0	1	0	0	1	0	0	0		TTAAAAATAAGCTGAATTTCAAAAATAATTAAGTCTTAGAAAGTTAAAATT
200230	'+'	1	1	592.39	24.66	8.69	1	CJE0199	threonyl-tRNA synthetase	45	1809	1	0	0	0	1	0	0	0		ATAAGCTGAATTTCAAAAATAATTAAGTCTTAGAAAGTTAAAATTAGAACT
202179	'+'	1	1	44.13	28.33	2.92	1	CJE0200	translation initiation factor IF-3	NA	519	0	0	1	0	1	0	0	0		AAATCAGATGTGTTGGCGATGATGGCAAAGTTTATGGTATTATCAGTAGTG
203172	'+'	1	1	15.01	2.55	2.22	1	CJE0201	D12 class N6 adenine-specific DNA methyltransferase	NA	1092	0	0	1	0	1	0	0	0		AATTTATGAAGCTAGTGTGCATTCAAATACTAGTGGAGTTTTTAAAGGTTT
203387	'-'	1	1	7.21	18	>100	1	CJE0201	D12 class N6 adenine-specific DNA methyltransferase	NA	1092	0	0	0	1	1	0	0	1		TTCTTCAGGTTTTTTATAATTTGCAATTAAATTTAGCATAAAATAATTAGA
203751	'+'	1	1	901.74	6.53	9.89	1	CJE0202	hypothetical protein	17	102	1	0	0	0	1	0	0	0		ACAACTTTATATTTTAGTTAAAAATTAAATTTTGTGCTAAAATTATATTTA
203912	'-'	1	1	5.52	2.44	10.08	1	CJE0202	hypothetical protein	NA	102	0	0	0	1	1	0	0	1		GGCACATTAAAAGAGATATTTTGACTAGGATTTTTTGCTAAAATTTAAAAG
203912	'-'	1	1	5.52	2.44	10.08	1	CJE0203	hypothetical protein	NA	114	0	0	0	1	1	0	0	1		GGCACATTAAAAGAGATATTTTGACTAGGATTTTTTGCTAAAATTTAAAAG
203912	'-'	1	1	5.52	2.44	10.08	1	CJE0204	hypothetical protein	NA	126	0	0	0	1	1	0	0	1		GGCACATTAAAAGAGATATTTTGACTAGGATTTTTTGCTAAAATTTAAAAG
205114	'+'	1	1	8.49	4.6	6.82	1	CJE0207	hypothetical protein	NA	240	0	0	1	0	1	0	0	0		CATGGCGGAATTTATGCTGATAAGGGTTCAAGGTAGAATATAATGTTAAAA
205982	'+'	1	1	1.27	>100	3.29	3	CJE0211	pathogenicity domain-containing protein	61	204	1	0	0	0	1	0	0	1		ATTCTGATGTTACTTTGCAAAACACATTTTTTAGCGGTAATATCAAAGGTA
205982	'+'	1	1	1.27	>100	3.29	3	CJE0210	hypothetical protein	NA	117	0	0	1	0	1	0	0	1		ATTCTGATGTTACTTTGCAAAACACATTTTTTAGCGGTAATATCAAAGGTA
205982	'+'	1	1	1.27	>100	3.29	3	CJE0209	hypothetical protein	NA	183	0	0	0	1	1	0	0	1		ATTCTGATGTTACTTTGCAAAACACATTTTTTAGCGGTAATATCAAAGGTA
207327	'-'	1	1	7.64	4	3.98	1	CJE0213	hypothetical protein	12	201	1	0	0	0	1	0	0	0		CATAGATAGTTACATGCTATTTTTATATAAAAAGTGGTTAAACTATGATTA
208277	'+'	1	1	5.09	>100	8.68	1	CJE0216	hypothetical protein	43	321	1	0	0	0	1	0	0	0		TTCTAAGATGTAACAGTACACAATAAGCTAAGTCAAGCTAATCTCACAGAG
208903	'+'	1	1	51.98	>100	5.95	2	CJE0219	hypothetical protein	126	183	1	0	0	0	1	0	0	1		AGATGTCAAACAACAGCACACATTCAGCCAAGCAAAGCTAATCTTGTCTTA
208903	'+'	1	1	51.98	>100	5.95	2	CJE0218	hypothetical protein	NA	117	0	0	0	1	1	0	0	1		AGATGTCAAACAACAGCACACATTCAGCCAAGCAAAGCTAATCTTGTCTTA
209501	'-'	1	1	9.76	7	19.52	1	CJE0220	DNA adenine methylase	NA	816	0	0	1	0	1	0	0	0		TGAAAATAAAAGCTTTGAATATATTTTAAAAGAATATGATTACAATGAAGC
210118	'+'	1	1	668.98	99.53	5.01	1	CJE0220	DNA adenine methylase	NA	816	0	0	0	1	1	0	0	1		AAAATAAAATTAAAAAAGCTTTGCTTTAAAAACAAAGCTATAATGCTTTTG
211561	'+'	1	1	27.58	2.3	11.09	1	CJE0222	TP901 family tail tape measure protein	NA	2217	0	0	0	1	1	0	0	1		GTAGTTGTGACGGTTTTTGCTTTTAAAGTAATATTAGATAATATACAAGAA
212361	'-'	1	1	50.92	>100	7.96	1	CJE0222	TP901 family tail tape measure protein	NA	2217	0	0	1	0	1	0	0	0		TTTTAGGCATTTCTTTAAAAGACATGGAGGATTTAGGCGATAGTATTAATA
213006	'+'	1	1	296.19	87.08	6.27	2	CJE0223	hypothetical protein	NA	327	0	0	1	0	1	0	0	1		ATTTTCCATATTCAACCCTTTTTAAGCGATTGTATTTTAAAATCTTTACTA
213006	'+'	1	1	296.19	87.08	6.27	2	CJE0222	TP901 family tail tape measure protein	NA	2217	0	0	0	1	1	0	0	1		ATTTTCCATATTCAACCCTTTTTAAGCGATTGTATTTTAAAATCTTTACTA
221071	'-'	1	1	8.49	21	6.58	2	CJE0235	hypothetical protein	182	192	1	0	0	0	1	0	0	0		CCATAACGCTTAATGCTCCAAGTATTAATTTAAATGGTAATACTCAAATTG
221071	'-'	1	1	8.49	21	6.58	2	CJE0236	baseplate assembly protein V%2C putative	NA	633	0	0	1	0	1	0	0	0		CCATAACGCTTAATGCTCCAAGTATTAATTTAAATGGTAATACTCAAATTG
221782	'+'	1	1	3.95	11	24.11	1	CJE0237	hypothetical protein	NA	315	0	0	0	1	1	0	0	1		CCTTTTAAATTAAGAGCTTTGCTTAATTTATTTTTTGTTACAATTCCTACA
221782	'+'	1	1	3.95	11	24.11	1	CJE0238	hypothetical protein	NA	123	0	0	0	1	1	0	0	1		CCTTTTAAATTAAGAGCTTTGCTTAATTTATTTTTTGTTACAATTCCTACA
222959	'-'	1	1	70.31	10.36	8.3	1	CJE0241	hypothetical protein	17	390	1	0	0	0	1	0	0	0		GCACAAAATTTTTCTAGTTTTTGGGTCAGCTTTTTAACTAAACTTACGACA
223072	'+'	1	1	12.25	>100	5.01	2	CJE0243	hypothetical protein	19	435	1	0	0	0	1	0	0	1		AAAAAATAATTTGCTTGATTAAAAAAAGAACTCATTTTAAAATTGCCGCTA
223072	'+'	1	1	12.25	>100	5.01	2	CJE0242	hypothetical protein	NA	174	0	0	0	1	1	0	0	1		AAAAAATAATTTGCTTGATTAAAAAAAGAACTCATTTTAAAATTGCCGCTA
223277	'-'	1	1	4.24	>100	8.77	2	CJE0242	hypothetical protein	95	174	1	0	0	0	1	0	0	1		ATCAATTCTGTGTTTAGGAGCTTTTGATTTTGTATGGGTTAAAATATAAAG
223277	'-'	1	1	4.24	>100	8.77	2	CJE0243	hypothetical protein	NA	435	0	0	0	1	1	0	0	1		ATCAATTCTGTGTTTAGGAGCTTTTGATTTTGTATGGGTTAAAATATAAAG
224740	'+'	1	1	12.31	>100	12.9	2	CJE0246	hypothetical protein	135	978	1	0	0	0	1	0	0	0		AAATGTCCAAATGAAGATATTAGTGCAAAAGAAAATGTTAAATTAGCAATG
224740	'+'	1	1	12.31	>100	12.9	2	CJE0245	hypothetical protein	NA	366	0	0	1	0	1	0	0	0		AAATGTCCAAATGAAGATATTAGTGCAAAAGAAAATGTTAAATTAGCAATG
229414	'+'	1	1	6.72	18	4.35	1	CJE0250	hypothetical protein	NA	1371	0	0	1	0	1	0	0	0		GAAGAGCTTGATTTAATCCAGCCAAAGGCTAAGGCAAATTATAATGAAATA
231394	'-'	1	1	4852	>100	7.02	1	CJE0251	prophage MuSo1%2C F protein%2C putative	NA	1239	0	0	0	1	1	0	0	1		GCTAAAACCATTTAAACTCCTTTTTAGTTTCATCAAGCTAAAATTATCTTA
231394	'-'	1	1	4852	>100	7.02	1	CJE0252	phage tail protein%2C putative	NA	375	0	0	0	1	1	0	0	1		GCTAAAACCATTTAAACTCCTTTTTAGTTTCATCAAGCTAAAATTATCTTA
231399	'-'	1	1	8.06	>100	6.87	1	CJE0251	prophage MuSo1%2C F protein%2C putative	NA	1239	0	0	0	1	1	0	0	1		CTAAAGCTAAAACCATTTAAACTCCTTTTTAGTTTCATCAAGCTAAAATTA
231399	'-'	1	1	8.06	>100	6.87	1	CJE0252	phage tail protein%2C putative	NA	375	0	0	0	1	1	0	0	1		CTAAAGCTAAAACCATTTAAACTCCTTTTTAGTTTCATCAAGCTAAAATTA
231641	'+'	1	1	8.91	6.33	4.52	2	CJE0253	tail protein X%2C putative	160	192	1	0	0	0	1	0	0	0		AAACTTTACCTTTAAAAGGGGATAGAAATACTTATTTAGATAAGCTTGAGA
231641	'+'	1	1	8.91	6.33	4.52	2	CJE0252	phage tail protein%2C putative	NA	375	0	0	1	0	1	0	0	0		AAACTTTACCTTTAAAAGGGGATAGAAATACTTATTTAGATAAGCTTGAGA
232404	'-'	1	1	6.37	4	14.46	1	CJE0254	tail protein D%2C putative	NA	978	0	0	0	1	1	0	0	1		TACTATATAAGAATTCTAAATTACTTTGATTATTTTGTAAAATACTTACTA
232884	'+'	1	1	3.95	6	4.38	2	CJE0254	tail protein D%2C putative	NA	978	0	0	1	0	1	0	0	1		TGAAATAAGAGCAGGTGGAAAACTTAAGATTAAAGATATTAATATGGATCA
232884	'+'	1	1	3.95	6	4.38	2	CJE0255	DNA-binding protein%2C putative	NA	285	0	0	0	1	1	0	0	1		TGAAATAAGAGCAGGTGGAAAACTTAAGATTAAAGATATTAATATGGATCA
233268	'-'	1	1	3.82	2.5	4.38	2	CJE0255	DNA-binding protein%2C putative	24	285	1	0	0	0	1	0	0	1		TTAAAATTATACCCTACTAAATAAAATTTAACTTTTTTGCTATAATTTGCA
233268	'-'	1	1	3.82	2.5	4.38	2	CJE0256	extracellular deoxyribonuclease	NA	672	0	0	0	1	1	0	0	1		TTAAAATTATACCCTACTAAATAAAATTTAACTTTTTTGCTATAATTTGCA
234298	'-'	1	1	83.38	66.5	5.74	1	CJE0257	hypothetical protein	22	276	1	0	0	0	1	0	0	0		ATTTAGAAAACAACAGCACACATTAAGCCAAACGAAGCTAATGTTGTCTCA
235007	'+'	1	1	3.82	>100	13.01	1	CJE0259	hypothetical protein	NA	693	0	0	0	1	1	0	0	1		TATCTTGGTTTTTAAACATATATTCAACTAGCTTATTATAAAACTCTCCTA
235654	'+'	1	1	18.25	5.78	6.58	1	CJE0260	hypothetical protein	NA	270	0	0	0	1	1	0	0	1		CATCGTCTTGCTTATAGTAATTTATAAAGCTATCTGCTATAAAATAAGGGA
235654	'+'	1	1	18.25	5.78	6.58	1	CJE0261	hypothetical protein	NA	963	0	0	0	1	1	0	0	1		CATCGTCTTGCTTATAGTAATTTATAAAGCTATCTGCTATAAAATAAGGGA
236791	'+'	1	1	6.79	17	16.44	1	CJE0262	hypothetical protein	NA	387	0	0	0	1	1	0	0	1		TAAATTTTTTGGCTTTTTTAACATATTTCATTTTTATGTTAAAATTTTTAA
237560	'+'	1	1	511.34	2.91	6.85	1	CJE0264	hypothetical protein	NA	180	0	0	0	1	1	0	0	1		GGACTTGTTAAATTCTTTTAAGTCTAATTTTTTGCTTTGAAGTCATTTTCT
241245	'+'	1	1	18.67	>100	42.74	1	CJE0270	bacteriophage DNA transposition protein A%2C putative	NA	2073	0	0	0	1	1	0	0	1		TGAGGGCGGAAAGGCTCTAAGGTTTCATCATCTCTTACTATAATATCAGCT
242425	'+'	1	1	28.43	3.23	8.25	2	CJE0272	transcriptional regulator%2C putative	82	633	1	0	0	0	1	0	0	1		AATACTTCAATTTTAATTGAAGTTTATTTTTAATTGTGATAAAATTTCAAT
242425	'+'	1	1	28.43	3.23	8.25	2	CJE0271	hypothetical protein	NA	201	0	0	0	1	1	0	0	1		AATACTTCAATTTTAATTGAAGTTTATTTTTAATTGTGATAAAATTTCAAT
242431	'-'	1	1	9.09	3.88	7.55	2	CJE0271	hypothetical protein	69	201	1	0	0	0	1	0	0	1		ATTTAACATATTTTATTGACTAATGTAAAATTTTTTACTATAATACTTCAA
242431	'-'	1	1	9.09	3.88	7.55	2	CJE0272	transcriptional regulator%2C putative	NA	633	0	0	0	1	1	0	0	1		ATTTAACATATTTTATTGACTAATGTAAAATTTTTTACTATAATACTTCAA
243767	'-'	1	1	4.74	>100	17.53	1	CJE0273	hypothetical protein	NA	978	0	0	0	1	1	0	0	1		ATAGCTTCCTTCTGGTATTTCATTTAAAAAGAAGTTGATATAGTAGCGATA
244154	'+'	1	1	64.08	6.39	4.05	1	CJE0274	pseudo	42	261	1	0	0	0	1	0	0	0		ATGAACATCATAAACGAATTTTTTGTTAGTTTTATTTTAATAAAGTTATAT
244491	'+'	1	0	7.64	19	1.92	1	CJE0275	N-acetyl-gamma-glutamyl-phosphate reductase	46	1029	0	1	0	0	1	0	0	0		AAGATATAGTTTTTAAATAAAAAATAATTTAAAAATTGTATTTTTATTTTA
244516	'+'	1	1	354.33	3.44	4.09	1	CJE0275	N-acetyl-gamma-glutamyl-phosphate reductase	21	1029	1	0	0	0	1	0	0	0		AATTTAAAAATTGTATTTTTATTTTAAGCTTTTTTGTTTATAATACTTGCT
246007	'+'	1	0	8.3	2.45	1.6	2	CJE0277	acetylglutamate kinase	24	840	1	0	0	0	1	0	0	0		GAGAAGATGCGAATTATTACGATCTTTCTTTAAATGAGTATAATCAAACTA
246007	'+'	1	0	8.3	2.45	1.6	2	CJE0276	acetyltransferase	NA	447	0	0	1	0	1	0	0	0		GAGAAGATGCGAATTATTACGATCTTTCTTTAAATGAGTATAATCAAACTA
246376	'+'	1	0	3.56	5.5	1.79	1	CJE0277	acetylglutamate kinase	NA	840	0	0	1	0	1	0	0	0		TTTTAAATCATATCAATAAAAATTTAGTCCATAGTTTGCAAAATTTAGGAG
246568	'+'	1	0	4.67	>100	0.8	1	CJE0277	acetylglutamate kinase	NA	840	0	0	1	0	1	0	0	0		TCATTGCTCCTATTGGCATGGATGAGAATTTTAATACTTATAATATCAACG
246714	'+'	1	1	11.88	10.33	2.99	2	CJE0278	acetylornithine aminotransferase	166	1182	1	0	0	0	1	0	0	0		AAAAATTCTTTAATTTCTAAAATCAGCCTTGAACAAGCTAAAATTTTAGCT
246714	'+'	1	1	11.88	10.33	2.99	2	CJE0277	acetylglutamate kinase	NA	840	0	0	1	0	1	0	0	0		AAAAATTCTTTAATTTCTAAAATCAGCCTTGAACAAGCTAAAATTTTAGCT
247111	'+'	1	1	31.83	5.8	4.1	1	CJE0278	acetylornithine aminotransferase	NA	1182	0	0	1	0	1	0	0	0		CTCAAGTGGATAAACTTTTACATACTAGCAATTTATATTATAATGAAAACA
248730	'-'	1	1	44.98	1.97	4.74	2	CJE0279	protein-L-isoaspartate O-methyltransferase	20	630	1	0	0	0	1	0	0	1		AGTATAGCTAAGTTTAACTCTATTTCAACTTTTTTAGTTACAATTTTTATT
248730	'-'	1	1	44.98	1.97	4.74	2	CJE0280	hexapaptide repeat-containing transferase	NA	549	0	0	0	1	1	0	0	1		AGTATAGCTAAGTTTAACTCTATTTCAACTTTTTTAGTTACAATTTTTATT
248737	'-'	1	1	14.43	12.33	7.55	2	CJE0279	protein-L-isoaspartate O-methyltransferase	27	630	0	1	0	0	1	0	0	1		TTATTTAAGTATAGCTAAGTTTAACTCTATTTCAACTTTTTTAGTTACAAT
248737	'-'	1	1	14.43	12.33	7.55	2	CJE0280	hexapaptide repeat-containing transferase	NA	549	0	0	0	1	1	0	0	1		TTATTTAAGTATAGCTAAGTTTAACTCTATTTCAACTTTTTTAGTTACAAT
250033	'+'	1	1	10.18	>100	3.19	1	CJE0281	nicotinate phosphoribosyltransferase	NA	1371	0	0	0	1	1	0	0	1		CAATCATAAGTATCAATCAAAAAAACAGGATTTTTTGGATAAATTTTCACA
251993	'+'	1	1	2.97	3.33	>100	1	CJE0283	hypothetical protein	NA	423	0	0	0	1	1	0	0	1		CTTGAATCAAGCCAAATAAAAAAGTACATAAAGTTGTGATAAAATGGTTGT
252813	'-'	1	1	131.55	>100	4.83	2	CJE0284	orotate phosphoribosyltransferase	81	609	1	0	0	0	1	0	0	0		AAAGATAAGGCAATAAGCGAAGATGAAGCAAAAAAAGCTTATGATGAAGTG
252813	'-'	1	1	131.55	>100	4.83	2	CJE0285	ribosome recycling factor	NA	558	0	0	1	0	1	0	0	0		AAAGATAAGGCAATAAGCGAAGATGAAGCAAAAAAAGCTTATGATGAAGTG
253706	'-'	1	1	356.03	1.89	11.76	1	CJE0286	preprotein translocase subunit SecG	27	372	1	0	0	0	1	0	0	0		ACTTTTCAAGTTTCAAAACTTTTCAAGTTTTATTTAGCTAAAATAATCATT
253859	'+'	1	1	1.27	>100	>100	1	CJE0287	hypothetical protein	NA	696	0	0	0	1	1	0	0	1		TATTAAGTAAAGATACGAAAAGATTAACAAAATCAAGATAAAGTGCTACTG
254518	'-'	1	1	569.05	40.44	4.78	1	CJE0287	hypothetical protein	40	696	1	0	0	0	1	0	0	0		ATATTATATAAATTAACTTTTTATTTAGTCTAATATGTTAGATTTCGCTCA
254573	'+'	1	1	24.61	59	7.76	2	CJE0288	carbonic anhydrase	66	636	0	1	0	0	1	0	0	1		GAAATCTAACATATTAGACTAAATAAAAAGTTAATTTATATAATATCTTTA
254573	'+'	1	1	24.61	59	7.76	2	CJE0287	hypothetical protein	NA	696	0	0	0	1	1	0	0	1		GAAATCTAACATATTAGACTAAATAAAAAGTTAATTTATATAATATCTTTA
254616	'+'	1	1	383.19	15.8	7.39	1	CJE0288	carbonic anhydrase	23	636	1	0	0	0	1	0	0	0		TATCTTTATGATTAAATGAAATCTTTGCTGAAATTTTGTTATAATTTCAAG
254911	'-'	1	1	7.21	>100	>100	1	CJE0288	carbonic anhydrase	NA	636	0	0	0	1	1	0	0	1		GCATTGCAACCTCCACAATTACTATGGCCACAAACGACGATATTTTTAATA
256093	'+'	1	1	22.49	14.25	2.72	1	CJE0289	mechanosensitive ion channel family protein	NA	1884	0	0	1	0	1	0	0	0		TTTTTATATCTTTAAGACGTTTTTTTGCAAATATAGTATATTTTTTCCTTG
256869	'-'	1	1	64.93	7.65	9	1	CJE0289	mechanosensitive ion channel family protein	NA	1884	0	0	0	1	1	0	0	1		TAGCCTTCTAAATCATTAATAGATACAAGATTTTGACGATATTTTGTTGTA
257513	'+'	1	1	1.98	>100	>100	1	CJE0290	NifU family protein	NA	972	0	0	0	1	1	0	0	1		TTGAGTTTTTCTCTATCTATTTCAGCTCTAGTTTCAGCTAAAATATCTACA
257929	'-'	1	1	101.84	12.29	3.76	1	CJE0290	NifU family protein	NA	972	0	0	1	0	1	0	0	0		CGGTAAGACTTTTTTGGCTTGTAGATGAAAAAACTGATAAAATTATCGATG
259431	'-'	1	1	9.34	4.67	3	1	CJE0291	cysteine desulfurase	92	1182	1	0	0	0	1	0	0	0		ATTTCACTTTAAAATTTTACTTTAGCATTTTATTTTTGTTATAATTTTTAA
259704	'+'	1	1	8.06	>100	27.47	1	CJE0292	pseudo	NA	401	0	0	0	1	1	0	0	1		TTTCTTCAATTTCTAAGATAATTTTTCTGTGAATTCTTGTATGATGGTTGA
260426	'+'	1	1	25.89	>100	19.73	1	CJE0293	hypothetical protein	NA	1167	0	0	0	1	1	0	0	1		AGATCAAAACTCATCTTTTTTTCATTTTCTTTTTTGATGTAATCTTCTATA
261216	'+'	1	1	3.56	5.5	>100	2	CJE0294	50S ribosomal protein L35	160	192	0	1	0	0	1	0	0	1		AAGGATTAGATAAGGTTAAATTTTGATATGGATTTGCCGAATTTATAGTCA
261216	'+'	1	1	3.56	5.5	>100	2	CJE0293	hypothetical protein	NA	1167	0	0	0	1	1	0	0	1		AAGGATTAGATAAGGTTAAATTTTGATATGGATTTGCCGAATTTATAGTCA
261241	'-'	1	1	27.26	2.92	4.38	1	CJE0293	hypothetical protein	24	1167	0	1	0	0	1	0	0	0		TGAATTTAATTTTTAAAAAACTTGGCACACATTTTGCTTATAAAAAAATCA
261322	'+'	1	1	125.11	2.01	6.74	1	CJE0294	50S ribosomal protein L35	54	192	0	1	0	0	1	0	0	0		TTTTTTAAAAATTAAATTCAGTCAAAAATTAGAAAAAATTTGATAGTATTT
261326	'+'	1	1	421.91	2.61	6.91	1	CJE0294	50S ribosomal protein L35	50	192	1	0	0	0	1	0	0	0		TTAAAAATTAAATTCAGTCAAAAATTAGAAAAAATTTGATAGTATTTATCT
261933	'-'	1	1	11.03	>100	10.41	1	CJE0295	50S ribosomal protein L20	NA	354	0	0	0	1	1	0	0	1		TTTGCAAAAGCAGCAGCATCATTCATAGCTAAATCTGCTAGAATTTTTCTA
262867	'+'	1	1	15.28	10	19.28	1	CJE0297	pseudo	NA	545	0	0	0	1	1	0	0	1		TGTATGCTTAAAGCTTGATTTTTAATATTTCTCCGTTATAAAATATAAATG
263083	'+'	1	1	5.09	>100	15.34	1	CJE0297	pseudo	NA	545	0	0	0	1	1	0	0	1		TAAATAAAACTTCTTTTTCTATCAGTTTTTTTCTTTCTGTATAATCTTTTA
263591	'-'	1	1	5.52	2.08	7.67	1	CJE0298	hypothetical protein	NA	858	0	0	0	1	1	0	0	1		TCCAATCATATTTAATTTATCCTTAATTAATATTATTATAATTTGCAATTA
263600	'+'	1	1	1097.36	7.91	8.67	1	CJE0298	hypothetical protein	33	858	1	0	0	0	1	0	0	0		TAAGTCATAAAAAATGCAATAAGTAAATTAAAATTTAGATATAATTGCAAA
264560	'-'	1	1	27.16	>100	30.85	1	CJE0298	hypothetical protein	NA	858	0	0	0	1	1	0	0	1		ATTTTTTGAAATTCCAGCAAAACGATGAAATTCAGCGTTTAAAATATAGTG
264560	'-'	1	1	27.16	>100	30.85	1	CJE0299	hypothetical protein	NA	477	0	0	0	1	1	0	0	1		ATTTTTTGAAATTCCAGCAAAACGATGAAATTCAGCGTTTAAAATATAGTG
266460	'-'	1	1	112.45	2.69	24.1	2	CJE0301	hypothetical protein	24	177	1	0	0	0	1	0	0	1		ATTATAAAAATTATAGCAAAACCAAACAAATTTAAGATAAAATAAGCTTTG
266460	'-'	1	1	112.45	2.69	24.1	2	CJE0302	molybdenum cofactor biosynthesis protein MoaC	NA	474	0	0	0	1	1	0	0	1		ATTATAAAAATTATAGCAAAACCAAACAAATTTAAGATAAAATAAGCTTTG
266508	'+'	1	1	62.8	12.38	4.1	2	CJE0302	molybdenum cofactor biosynthesis protein MoaC	21	474	1	0	0	0	1	0	0	1		TACAAAGCTTATTTTATCTTAAATTTGTTTGGTTTTGCTATAATTTTTATA
266508	'+'	1	1	62.8	12.38	4.1	2	CJE0301	hypothetical protein	NA	177	0	0	0	1	1	0	0	1		TACAAAGCTTATTTTATCTTAAATTTGTTTGGTTTTGCTATAATTTTTATA
266921	'+'	1	0	8.06	>100	0.69	2	CJE0303	hypothetical protein	59	264	0	1	0	0	1	0	0	0		TTAAGTGGAGTTAGTATAGGACTTTTAACTATATATGATATGATCAAGGCT
266921	'+'	1	0	8.06	>100	0.69	2	CJE0302	molybdenum cofactor biosynthesis protein MoaC	NA	474	0	0	1	0	1	0	0	0		TTAAGTGGAGTTAGTATAGGACTTTTAACTATATATGATATGATCAAGGCT
267222	'+'	1	1	15.8	>100	3.65	2	CJE0304	hypothetical protein	35	1137	1	0	0	0	1	0	0	0		TATGTTGATAGCAAAAAAGATCGTTTGGATATATTTGATAAATTAAAAGCT
267222	'+'	1	1	15.8	>100	3.65	2	CJE0303	hypothetical protein	NA	264	0	0	1	0	1	0	0	0		TATGTTGATAGCAAAAAAGATCGTTTGGATATATTTGATAAATTAAAAGCT
267867	'+'	1	1	11.88	5.2	2.85	1	CJE0304	hypothetical protein	NA	1137	0	0	1	0	1	0	0	0		AGCTCATTTTGAAAAAGAAAGAATTTTAAAAATTTCAAGTATTATTTTAAA
269198	'-'	1	1	37.34	2.02	6.63	2	CJE0305	exodeoxyribonuclease III	7	780	1	0	0	0	1	0	0	1		AATTTTTTTAAATGGATTGTAGTTTTAAATCTTTTTATGTTATGATTTACA
269198	'-'	1	1	37.34	2.02	6.63	2	CJE0306	sulfatase%2C putative	NA	1539	0	0	0	1	1	0	0	1		AATTTTTTTAAATGGATTGTAGTTTTAAATCTTTTTATGTTATGATTTACA
269203	'-'	1	1	14	>100	5.32	2	CJE0305	exodeoxyribonuclease III	12	780	0	1	0	0	1	0	0	1		TATTGAATTTTTTTAAATGGATTGTAGTTTTAAATCTTTTTATGTTATGAT
269203	'-'	1	1	14	>100	5.32	2	CJE0306	sulfatase%2C putative	NA	1539	0	0	0	1	1	0	0	1		TATTGAATTTTTTTAAATGGATTGTAGTTTTAAATCTTTTTATGTTATGAT
269263	'+'	1	1	2141.68	>100	8.06	2	CJE0306	sulfatase%2C putative	25	1539	1	0	0	0	1	0	0	1		AAAAAGATTTAAAACTACAATCCATTTAAAAAAATTCAATAAAATTAAAAG
269263	'+'	1	1	2141.68	>100	8.06	2	CJE0305	exodeoxyribonuclease III	NA	780	0	0	0	1	1	0	0	1		AAAAAGATTTAAAACTACAATCCATTTAAAAAAATTCAATAAAATTAAAAG
269492	'-'	1	1	6.79	2.5	18.26	1	CJE0306	sulfatase%2C putative	NA	1539	0	0	0	1	1	0	0	1		CCCATAAAAACTAATAAAGTAAACACTTAAAAAAGATGATATTATAAATAA
269833	'+'	1	0	7.64	2.43	1.39	1	CJE0306	sulfatase%2C putative	NA	1539	0	0	1	0	1	0	0	0		TTCTTGCCTTTTTTTAGAAACTATAATGAAATAAGAATGTATAATACTCCT
270004	'-'	1	1	13.58	22	10.7	1	CJE0306	sulfatase%2C putative	NA	1539	0	0	0	1	1	0	0	1		AAAAAGACTACATTATCTTTTTTGGTATAAAAATTGGTATCATTTTTAGTA
271174	'+'	1	0	4.67	>100	1.78	2	CJE0308	hypothetical protein	2	228	1	0	0	0	1	0	0	0		GTGTGCTTTTAGCTCTTTTTGTTTGGGGCTTTATTTTATATAATATTTACT
271174	'+'	1	0	4.67	>100	1.78	2	CJE0307	diacylglycerol kinase	NA	357	0	0	1	0	1	0	0	0		GTGTGCTTTTAGCTCTTTTTGTTTGGGGCTTTATTTTATATAATATTTACT
274290	'+'	1	1	11.46	>100	39.04	1	CJE0310	D12 class N6 adenine-specific DNA methyltransferase%2C putative	NA	3351	0	0	1	0	1	0	0	0		TTTAGAGGTATGAGATATTCTTTAATACAAAGCTTTGATAAAATTTATATA
274733	'+'	1	1	5.94	>100	21.69	1	CJE0310	D12 class N6 adenine-specific DNA methyltransferase%2C putative	NA	3351	0	0	1	0	1	0	0	0		ACTTAAAGACTTTAATACAAAAACTAAAGATGAGTTATATAAAATTTATGA
274785	'-'	1	1	53.47	>100	4.25	1	CJE0310	D12 class N6 adenine-specific DNA methyltransferase%2C putative	NA	3351	0	0	0	1	1	0	0	1		AAAGGGCGATAATTAACTTTGTATATAGAATTTTCAAATATTATGTTTTTA
276419	'-'	1	1	181.2	41.67	8.09	1	CJE0311	hypothetical protein	21	714	1	0	0	0	1	0	0	0		CAAGCCCTTTCTTTGGGCTTGAATTTTAAAAATTTATGCTATGATTTTGTA
276422	'+'	1	1	9.48	7.86	3.17	1	CJE0311	hypothetical protein	NA	714	0	0	0	1	1	0	0	1		TTTGGCCTTTTTATCCCATAAATTCATATATTTTCCTTGATAAAATATACA
276422	'+'	1	1	9.48	7.86	3.17	1	CJE0312	methyl-accepting chemotaxis protein	NA	1989	0	0	0	1	1	0	0	1		TTTGGCCTTTTTATCCCATAAATTCATATATTTTCCTTGATAAAATATACA
277817	'+'	1	1	85.73	39.4	10.23	1	CJE0312	methyl-accepting chemotaxis protein	NA	1989	0	0	0	1	1	0	0	1		ATGGCGTTAGCAATATTAACGCTTAAAGTGTTTTTTGTTAAAATTCTATCA
278503	'-'	1	1	316.14	2.65	9.51	1	CJE0312	methyl-accepting chemotaxis protein	36	1989	1	0	0	0	1	0	0	0		AAAAAAGTTCATTTTTATGCATTTCTTTCTCTATATTTCTGCTATAATAAT
278506	'+'	1	1	5.93	16	35.07	2	CJE0313	zinc transporter ZupT	157	876	0	1	0	0	1	0	0	1		CATTTTTTGCATTATAACTCCTATATTTATATTTTGGAAATAAAATTATTA
278506	'+'	1	1	5.93	16	35.07	2	CJE0312	methyl-accepting chemotaxis protein	NA	1989	0	0	0	1	1	0	0	1		CATTTTTTGCATTATAACTCCTATATTTATATTTTGGAAATAAAATTATTA
278630	'+'	1	1	16.55	5	4.57	1	CJE0313	zinc transporter ZupT	33	876	0	1	0	0	1	0	0	0		ATTTTTTATACTTTTTGCCATTTATTAACTTTTTACATATATATAATTATA
278634	'-'	1	1	4.24	>100	7.23	2	CJE0312	methyl-accepting chemotaxis protein	167	1989	0	1	0	0	1	0	0	1		TTTGTTCAAATGTAAATTGCATTTATTAATTCTTAATATATAATTATAGTG
278634	'-'	1	1	4.24	>100	7.23	2	CJE0313	zinc transporter ZupT	NA	876	0	0	0	1	1	0	0	1		TTTGTTCAAATGTAAATTGCATTTATTAATTCTTAATATATAATTATAGTG
279577	'-'	1	1	16.97	17	8.77	1	CJE0313	zinc transporter ZupT	NA	876	0	0	0	1	1	0	0	1		CAAGCCCTTTCTTTGGGCTTGAATTTTAAAAATTTATGCTATGATTTTGTA
279580	'+'	1	1	9.48	>100	2.44	1	CJE0314	methyl-accepting chemotaxis protein	NA	1980	0	0	0	1	1	0	0	1		GAATATTGAAAATTATTTTTTGTTGTTAAGTGTTTATTTATAAAATATACA
281667	'-'	1	1	599.18	9.4	3.76	1	CJE0314	methyl-accepting chemotaxis protein	51	1980	1	0	0	0	1	0	0	0		TACTTTTATATTTAAGTAAAAATCTAGATTTTTTAATTTATAATTCTAAAA
281785	'+'	1	1	7.64	2.8	13.5	1	CJE0315	hypothetical protein	NA	510	0	0	0	1	1	0	0	1		AATAAAGCTCGTTAGCATATCAAAAAAAATAAAATTAATATAAAATTATTT
281850	'+'	1	1	29.28	2.35	9.3	1	CJE0315	hypothetical protein	NA	510	0	0	0	1	1	0	0	1		AAAACTATTTAACAATATCAAATACATTTTAAGGTGTGATAAAATTCAGGA
282123	'-'	1	0	2.97	8	1.03	1	CJE0315	hypothetical protein	NA	510	0	0	1	0	1	0	0	0		TCTATTTTTCTGACAATCAATCAATTCACCACTCAAGCCGATCTTAGCAAA
282947	'-'	1	1	23.31	13.25	2.65	2	CJE0316	hypothetical protein	112	510	1	0	0	0	1	0	0	0		AAAGAATTTAATGAAGCCTTAAAAGTCAATCAAGATGCTAAAATTTTCTTA
282947	'-'	1	1	23.31	13.25	2.65	2	CJE0317	SPFH domain-containing protein	NA	1089	0	0	1	0	1	0	0	0		AAAGAATTTAATGAAGCCTTAAAAGTCAATCAAGATGCTAAAATTTTCTTA
283394	'-'	1	1	66.37	19.75	5.46	1	CJE0317	SPFH domain-containing protein	NA	1089	0	0	1	0	1	0	0	0		ATTATCGATCCAGTTGTTCGTGATGTAGTGCGAAGTGTTGTAGGAAAATAT
284939	'-'	1	1	8.3	2.31	11.58	1	CJE0318	branched-chain amino acid aminotransferase	55	915	1	0	0	0	1	0	0	0		ACCTTAATTTAATAAAAGCTTATTGTTAGTATATTTTTGATAAAATCCCGA
285892	'+'	1	1	12.73	6	7.44	1	CJE0321	hypothetical protein	NA	1092	0	0	1	0	1	0	0	0		ACGAACTAAGATTTTTAGATGTAAAAAGATCTTGTGATAAACTTGGTATTA
286456	'-'	1	1	1.98	2	11.57	1	CJE0321	hypothetical protein	NA	1092	0	0	0	1	1	0	0	1		AGAAAATCTTGTATAAGCGTTTTTAAAATGCGAATAAAATAAAATATGAGA
286868	'+'	1	1	25.46	>100	8.15	1	CJE0322	%283R%29-hydroxymyristoyl-ACP dehydratase	35	441	0	1	0	0	1	0	0	0		TTAAGAAAAACTTTTTTGTTAATATAATTTTTAATGATTTTTTTATATAAT
286873	'+'	1	1	1560.75	51.41	9.63	1	CJE0322	%283R%29-hydroxymyristoyl-ACP dehydratase	30	441	1	0	0	0	1	0	0	0		AAAAACTTTTTTGTTAATATAATTTTTAATGATTTTTTTATATAATAAAAT
290523	'+'	1	0	6.32	4.2	1.77	1	CJE0326	rod shape-determining protein MreC	NA	750	0	0	1	0	1	0	0	0		ATGTTCTCCGTGTTAATGATTTTGTTATAGGTAATTTTTATAATATTAAAG
291377	'+'	1	1	75.26	48.62	2.36	1	CJE0327	carbamoyl phosphate synthase large subunit	24	3270	1	0	0	0	1	0	0	0		GTATCGATAATTTCAAAGTTTATAAAACTAATTTTTGTTATAATCAGCCCA
292444	'-'	1	1	11.85	16	17.53	1	CJE0327	carbamoyl phosphate synthase large subunit	NA	3270	0	0	0	1	1	0	0	1		CCTGGAAATTTTTCAAAGGTAAAGCGAGGAATTTTTGTTACAATATAATCA
293210	'+'	1	1	27.58	8.5	3.85	1	CJE0327	carbamoyl phosphate synthase large subunit	NA	3270	0	0	1	0	1	0	0	0		CTTTTGCGCTTAAAGATATGGGTATTAAAACTATTATGTATAATTGTAATC
294793	'-'	1	1	5.14	>100	4.38	1	CJE0328	hypothetical protein	NA	423	0	0	0	1	1	0	0	1		ACGACGTACTAAATTTTTAAAAGATTTTGGAATTCTTGCTAAACTTTTTAA
295065	'-'	1	0	9.34	2.38	1.97	1	CJE0328	hypothetical protein	NA	423	0	0	0	1	1	0	0	1		TTGAAGATATTTTAAAAGCTCTTTAATTAACGTATTTTTATCATTTTATTC
295327	'+'	1	1	8.06	5.75	10.96	1	CJE0329	transaldolase	NA	978	0	0	0	1	1	0	0	1		GGAGCAGTATTAACAGAATTCTCAAAAAGAAGTTCTTTGATATAATAGTCT
295893	'+'	1	0	5.94	2.18	1.32	1	CJE0329	transaldolase	NA	978	0	0	0	1	1	0	0	1		TGCTTTTTGAATATCAGAAATTGCTAATTCTTCATAAATATCTTTTGTTTT
299472	'+'	1	1	2.77	>100	>100	1	CJE0332	chemotaxis protein CheA	NA	2310	0	0	0	1	1	0	0	1		TCTTCTGGATTTGATTCAAGCTCTACTAAATCATGGTCGATTTGCTCAACA
299472	'+'	1	1	2.77	>100	>100	1	CJE0333	chemotaxis protein CheV	NA	957	0	0	0	1	1	0	0	1		TCTTCTGGATTTGATTCAAGCTCTACTAAATCATGGTCGATTTGCTCAACA
300524	'-'	1	1	1748.64	82.96	2.79	2	CJE0333	chemotaxis protein CheV	39	957	1	0	0	0	1	0	0	0		CTTAGCTAGTTTTGCATATAAGAGAAGTTTTTTTGTAGTAGAATATCAGCA
300524	'-'	1	1	1748.64	82.96	2.79	2	CJE0334	hypothetical protein	NA	636	0	0	1	0	1	0	0	0		CTTAGCTAGTTTTGCATATAAGAGAAGTTTTTTTGTAGTAGAATATCAGCA
300857	'-'	1	1	5.53	>100	3.84	1	CJE0334	hypothetical protein	NA	636	0	0	1	0	1	0	0	0		AAGTAAAGGTAATAATCTTGTTTTAAATAATGCTTTTATAAAATTAGCTCA
301242	'+'	1	1	15.91	>100	10.84	1	CJE0335	transcription elongation factor GreA	NA	486	0	0	0	1	1	0	0	1		TTCATGAGCATCTGCGATTAAAATCGCTCCATTTTGTAGTAAAATTTTTTA
301809	'-'	1	1	157.86	2.47	8.28	2	CJE0335	transcription elongation factor GreA	78	486	1	0	0	0	1	0	0	0		TATGAAGCTTACAATAAATATGATTATAAGGCATTTTTTGCTAAAGTTGAT
301809	'-'	1	1	157.86	2.47	8.28	2	CJE0336	ipid-A-disaccharide synthase	NA	1095	0	0	1	0	1	0	0	0		TATGAAGCTTACAATAAATATGATTATAAGGCATTTTTTGCTAAAGTTGAT
301829	'-'	1	1	8.49	>100	2.12	2	CJE0335	transcription elongation factor GreA	98	486	0	1	0	0	1	0	0	0		AAGTCAATGTTTTAAATTTATATGAAGCTTACAATAAATATGATTATAAGG
301829	'-'	1	1	8.49	>100	2.12	2	CJE0336	ipid-A-disaccharide synthase	NA	1095	0	0	1	0	1	0	0	0		AAGTCAATGTTTTAAATTTATATGAAGCTTACAATAAATATGATTATAAGG
302421	'+'	1	1	3.82	4	5.78	1	CJE0336	ipid-A-disaccharide synthase	NA	1095	0	0	0	1	1	0	0	1		TTGTTAAAAAATTGATTATCAAAGGGCAAAATAGAAGCTAAAATATCAAAA
302860	'-'	1	1	37.34	4.67	3.53	1	CJE0336	ipid-A-disaccharide synthase	23	1095	0	1	0	0	1	0	0	0		TGTATTCTTCCATAACTTCTTTTAATTAAGCCAAAATAAGATAAAATGTTT
303085	'-'	1	0	112.6	13.95	1.83	2	CJE0336	ipid-A-disaccharide synthase	248	1095	1	0	0	0	1	0	0	0		TGCTTGGATCACTTGGATTGACTGGTCAAAAAGCAATCCTGATATAGGAAC
303085	'-'	1	0	112.6	13.95	1.83	2	CJE0337	major antigenic peptide PEB3	NA	753	0	0	1	0	1	0	0	0		TGCTTGGATCACTTGGATTGACTGGTCAAAAAGCAATCCTGATATAGGAAC
303574	'+'	1	1	10.18	>100	24.11	1	CJE0337	major antigenic peptide PEB3	NA	753	0	0	0	1	1	0	0	1		GGCCAAAATTTACATTTACTTTAACGCCTGTTTTTTCGCTATATTTGTTTG
303722	'-'	1	1	199.44	59.8	5.12	1	CJE0337	major antigenic peptide PEB3	36	753	1	0	0	0	1	0	0	0		TTTTGTTACATTATAACTATTTATTAACATATAATTTCTAAAATCTTACCT
303754	'-'	1	1	2.12	>100	>100	1	CJE0337	major antigenic peptide PEB3	68	753	0	1	0	0	1	0	0	0		AATACCAAGCAAAAGTTAGATTTTAATAATATTTTTGTTACATTATAACTA
303833	'+'	1	1	10.27	4.25	18.63	1	CJE0338	pseudo	NA	1295	0	0	0	1	1	0	0	1		AATCTAACTTTTGCTTGGTATTTTTGCAAGCAAAAGTTAAAATTGTTATTG
304202	'-'	1	1	12.64	2.1	14.85	1	CJE0338	pseudo	NA	1295	0	0	1	0	1	0	0	0		GCTATACCTTCTACTTTACTTGCAGGATATATTTCAGATAAAATTTTTAAA
305237	'-'	1	1	92.93	11.25	5.41	1	CJE0338	pseudo	115	1295	1	0	0	0	1	0	0	0		TTTCGTATTATTTTTAATTATTTTTTTATTTTATATCGATTAACATTATTT
305325	'+'	1	1	4.67	3.67	16.63	1	CJE0339	stationary phase survival protein SurE	52	777	0	1	0	0	1	0	0	0		AAATAATACGAAATTTATATAATTTAAAAATTAAAATTTTATACTATGAAG
305353	'+'	1	1	87.42	6.68	8.13	1	CJE0339	stationary phase survival protein SurE	24	777	1	0	0	0	1	0	0	0		AATTAAAATTTTATACTATGAAGCTTTAAAAAAATATGTTAAAATCCAGAT
306398	'+'	1	1	10.18	18	3.35	1	CJE0340	thiF family protein	NA	651	0	0	1	0	1	0	0	0		GTGAAAATTTAGGCGAAGAAAAAGCTAAGGTTTTTGCTAGAATTTACAATG
308213	'-'	1	1	13.79	2.26	3.26	2	CJE0342	pantoate--beta-alanine ligase	117	849	1	0	0	0	1	0	0	0		TAAAGATTTTAAAGCAAAATTTGTAAAGCATTTTGATAAAATTGACCCTCA
308213	'-'	1	1	13.79	2.26	3.26	2	CJE0343	3-methyl-2-oxobutanoate hydroxymethyltransferase	NA	825	0	0	1	0	1	0	0	0		TAAAGATTTTAAAGCAAAATTTGTAAAGCATTTTGATAAAATTGACCCTCA
308814	'-'	1	1	19.1	16	2.53	1	CJE0343	3-methyl-2-oxobutanoate hydroxymethyltransferase	NA	825	0	0	1	0	1	0	0	0		CCTATGACTACCATAGTGCAAAAATTCTAGATAATTGCGATATAGATATCA
308964	'-'	1	1	95.9	16.4	5.36	1	CJE0343	3-methyl-2-oxobutanoate hydroxymethyltransferase	33	825	1	0	0	0	1	0	0	0		TACTTTATCATTCATTTACTATTTATGAAAAATTATATGCTAGTTTTTTGC
309102	'+'	1	1	38.19	8.5	12.42	1	CJE0344	beta-lactamase	46	762	1	0	0	0	1	0	0	0		ATTTTAGAAAATTTCAGTTCATGTTAAAGGATATTTAAAGAAAATAAAGCT
309241	'+'	1	1	4.24	3.5	5.11	1	CJE0344	beta-lactamase	NA	762	0	0	1	0	1	0	0	0		TTGGGCAAGATAAGATATTAAATAATTGGTTTAAAGAGTATAATACAAGCG
310373	'+'	1	1	9.09	>100	8.77	1	CJE0345	molybdenum ABC transporter%2C ATP-binding protein	NA	885	0	0	0	1	1	0	0	1		TCGTGACTTACCAATAAAGTAGTGATTTTAAAATGTTGTAAAATTTTCACA
311168	'-'	1	1	16.55	10.75	3.01	2	CJE0345	molybdenum ABC transporter%2C ATP-binding protein	277	885	1	0	0	0	1	0	0	0		CAAAACCTACTTGATGCTTCTTATGCTCTAGGAAAGGGTAAAATTTATACA
311168	'-'	1	1	16.55	10.75	3.01	2	CJE0346	molybdenum ABC transporter%2C permease protein	NA	669	0	0	1	0	1	0	0	0		CAAAACCTACTTGATGCTTCTTATGCTCTAGGAAAGGGTAAAATTTATACA
312742	'-'	1	1	67.05	5.08	3.88	1	CJE0348	molybdenum ABC transporter%2C periplasmic molybdenum-binding protein	33	750	1	0	0	0	1	0	0	0		TTTATTTTATGCAAAAAAGATACAAAATAAAATTTCTTATGTTATAATACA
313016	'+'	1	1	17.98	>100	4.53	1	CJE0349	biotin biosynthesis protein BioC	NA	687	0	0	0	1	1	0	0	1		AAAAATAGGGTTTAAAAATTTGTTCAAGTTCTTTTGTGCTAAAATATTTTA
313554	'+'	1	1	12.73	5.29	7.64	1	CJE0350	hypothetical protein	NA	612	0	0	0	1	1	0	0	1		ATAAGCTTTGAAAAAGTGTTTTTTAAAGCATTTTGAGGAAAAATTTCATCA
315224	'-'	1	1	99.72	9.55	6.16	2	CJE0351	8-amino-7-oxononanoate synthase	28	1143	1	0	0	0	1	0	0	1		TTCATTTTGCATTATAACTTCTTTTTTAAATATATTTTGGCAAAATAATAC
315224	'-'	1	1	99.72	9.55	6.16	2	CJE0352	adenosylmethionine--8-amino-7-oxononanoate transaminase	NA	1284	0	0	0	1	1	0	0	1		TTCATTTTGCATTATAACTTCTTTTTTAAATATATTTTGGCAAAATAATAC
315270	'+'	1	1	4.24	3.5	20.24	2	CJE0352	adenosylmethionine--8-amino-7-oxononanoate transaminase	NA	1284	0	0	1	0	1	0	0	1		TAAAGTATTATTTTGCCAAAATATATTTAAAAAAGAAGTTATAATGCAAAA
315270	'+'	1	1	4.24	3.5	20.24	2	CJE0351	8-amino-7-oxononanoate synthase	NA	1143	0	0	0	1	1	0	0	1		TAAAGTATTATTTTGCCAAAATATATTTAAAAAAGAAGTTATAATGCAAAA
315300	'+'	1	1	12.73	3.14	3.98	1	CJE0352	adenosylmethionine--8-amino-7-oxononanoate transaminase	NA	1284	0	0	1	0	1	0	0	0		AAAAGAAGTTATAATGCAAAATGAAATTTTAAAAAAACTCGATTTAGAGCA
315569	'-'	1	1	7.64	4.6	9.21	1	CJE0352	adenosylmethionine--8-amino-7-oxononanoate transaminase	NA	1284	0	0	0	1	1	0	0	1		AATGGCACTTGAACCATTATCTGCGTAAAAACATTTGTTAAAATTCCTGCC
316249	'-'	1	1	2.55	>100	8.77	1	CJE0352	adenosylmethionine--8-amino-7-oxononanoate transaminase	NA	1284	0	0	0	1	1	0	0	1		TCTTTTTTGATAAACTCGCTTAAAATTTGATTTTTTACTAAAATATTTTCA
316774	'+'	1	1	10.18	>100	16.8	1	CJE0353	dethiobiotin synthetase	NA	606	0	0	0	1	1	0	0	1		CTTCAATGCTAAGCAAGATATGATTAATGCTTCCAAGATAGTATTTTGCTA
316900	'+'	1	1	4.67	4.67	3.51	1	CJE0353	dethiobiotin synthetase	NA	606	0	0	0	1	1	0	0	1		CACCCGCAAGCTCAATAAGTAGGTTTTTGCTTTTTGGTAAAATGATATCTA
317300	'-'	1	1	14.43	18	2.02	2	CJE0353	dethiobiotin synthetase	162	606	1	0	0	0	1	0	0	0		GTTTTGGATTTTCTTTTACTTTTTTAAGCTTAAGTATGCAAAATATCGCTA
317300	'-'	1	1	14.43	18	2.02	2	CJE0354	SMR family multidrug efflux pump	NA	315	0	0	1	0	1	0	0	0		GTTTTGGATTTTCTTTTACTTTTTTAAGCTTAAGTATGCAAAATATCGCTA
317504	'-'	1	1	16.55	10.75	2.25	2	CJE0354	SMR family multidrug efflux pump	42	315	1	0	0	0	1	0	0	0		AATGAGGCTGTTTCTATAATTAAACTTGTGCTTATAGCGATTTTACTTTTA
317504	'-'	1	1	16.55	10.75	2.25	2	CJE0355	SMR family multidrug efflux pump	NA	339	0	0	1	0	1	0	0	0		AATGAGGCTGTTTCTATAATTAAACTTGTGCTTATAGCGATTTTACTTTTA
317830	'-'	1	1	132.82	2.34	6.09	1	CJE0355	SMR family multidrug efflux pump	27	339	1	0	0	0	1	0	0	0		AAAAGTAAATTTATAGCTTCTTTTAATTTCTTTAAGATATAATTTGTTTTA
317911	'+'	1	1	3334.74	77.3	8.73	1	CJE0356	50S ribosomal protein L25%2Fgeneral stress protein Ctc	24	537	1	0	0	0	1	0	0	0		GAAGCTATAAATTTACTTTTCCATAAGCCAAAATTAGATATAATCAAAGCT
319074	'+'	1	1	11.46	2.42	2.39	1	CJE0358	hypothetical protein	NA	1059	0	0	1	0	1	0	0	0		TTTTTTCGTTTTATTTCAGGGATTTATTTAAAAAATTTTTTTATTATATTT
319424	'+'	1	1	22.07	9.67	3.52	1	CJE0358	hypothetical protein	NA	1059	0	0	1	0	1	0	0	0		TTATGCAAATGATTATAAGAGAAATATTTTAAAAAATGGTACTATTATGAA
320099	'+'	1	1	68.35	12.53	2.94	1	CJE0359	diaminopimelate decarboxylase	18	1209	1	0	0	0	1	0	0	0		TTATATGTATTATAAGCATCGATAAATTAAGCTTTGTGTAGTAAAATTATA
320843	'-'	1	1	7.64	>100	>100	1	CJE0359	diaminopimelate decarboxylase	NA	1209	0	0	0	1	1	0	0	1		CTCCATTCCTATAGTTAAATCAAGCCCATGAAGTTGTGCTAATATACCTTG
321164	'+'	1	1	17.4	>100	2.19	2	CJE0360	HAD family hydrolase	163	768	1	0	0	0	1	0	0	0		TTGCTAAAGCAAGGTCTTTACCTAGCACTCAAAGTGGCGATATAATGGTTA
321164	'+'	1	1	17.4	>100	2.19	2	CJE0359	diaminopimelate decarboxylase	NA	1209	0	0	1	0	1	0	0	0		TTGCTAAAGCAAGGTCTTTACCTAGCACTCAAAGTGGCGATATAATGGTTA
321447	'+'	1	1	6.79	>100	2.5	1	CJE0360	HAD family hydrolase	NA	768	0	0	1	0	1	0	0	0		AATTGATCGATTTTTTAAATGCAAAAAATCTTCCTTATGTTATCATTACTA
323326	'-'	1	1	3.82	4	17.35	1	CJE0362	histidinol-phosphate aminotransferase	NA	1095	0	0	0	1	1	0	0	1		TGTATTTTTGAGCCAATGTGCTTTTAAGTTCTATCATACTATCATCAGGGT
327452	'-'	1	1	3.56	1.9	10.41	1	CJE0365	flagellar assembly protein H	NA	831	0	0	0	1	1	0	0	1		AAATTTTCAAGATTTTCGCAAGCATTATCGAGTTTGGCTATACTTTTTAAA
329507	'+'	1	1	30.55	>100	2.16	2	CJE0367	FUR family transcriptional regulator	258	411	0	1	0	0	1	0	0	0		TAAAAAAAGTAAAATTTGGTTTATTTTTAGTGAAAATGTTAAAATTGGCGG
329507	'+'	1	1	30.55	>100	2.16	2	CJE0366	1-deoxy-D-xylulose-5-phosphate synthase	NA	1848	0	0	1	0	1	0	0	0		TAAAAAAAGTAAAATTTGGTTTATTTTTAGTGAAAATGTTAAAATTGGCGG
329660	'-'	1	1	3.95	3	10.96	1	CJE0366	1-deoxy-D-xylulose-5-phosphate synthase	NA	1848	0	0	0	1	1	0	0	1		GAAGTTTATATTAAATAATATTTTTTATTATTTAATGATAAAATTTTAAAA
329741	'+'	1	1	13.04	34	4.38	1	CJE0367	FUR family transcriptional regulator	24	411	1	0	0	0	1	0	0	0		TATTATTTAATATAAACTTCTTTTAATAAAAATTTTATTATTATTTTTACT
330199	'+'	1	1	224.48	>100	5.79	1	CJE0368	hypothetical protein	22	1197	1	0	0	0	1	0	0	0		GTTGATAGTTGCAAAAAGTGTCATTAAGCAAAATAAGGTTAAAATAACCCA
331732	'+'	1	1	44.98	14.25	7.14	1	CJE0369	ubiquinone%2Fmenaquinone biosynthesis methyltransferase	NA	708	0	0	1	0	1	0	0	0		GCATGCTAAATGTTGCAAAAGAAAAATTTCCAAATGTCGAATTTATAGAAG
332687	'+'	1	1	7.9	5	2.49	1	CJE0370	exodeoxyribonuclease VII large subunit	NA	1164	0	0	1	0	1	0	0	0		AATGCTCCTTTTTCTCTTATACGAGCTTTAAAAAAAGCCGATGATATGGAT
332693	'-'	1	1	182.89	94	6.44	1	CJE0370	exodeoxyribonuclease VII large subunit	NA	1164	0	0	0	1	1	0	0	1		AAACAAAAAAGATCTTCTCTGCTTCCTCCACCACGTGCTATAATAAGAACA
333214	'+'	1	1	143.81	4.22	4.91	2	CJE0371	phosphoserine aminotransferase	83	1077	1	0	0	0	1	0	0	0		TAAAAGCAAAAAGTTTATTTGTATCAGAAAAAATGGTAAAATAGCAAATTT
333214	'+'	1	1	143.81	4.22	4.91	2	CJE0370	exodeoxyribonuclease VII large subunit	NA	1164	0	0	1	0	1	0	0	0		TAAAAGCAAAAAGTTTATTTGTATCAGAAAAAATGGTAAAATAGCAAATTT
334612	'+'	1	1	25.46	2.18	4.02	1	CJE0372	endoribonuclease L-PSP family protein	NA	351	0	0	1	0	1	0	0	0		ATCTGGTTAGCTAATATGCAAGATTTTGATGCAATGAATGAAACTTATGAT
334994	'+'	1	1	14.43	4.71	9.4	1	CJE0373	3-oxoacyl-%28acyl carrier protein%29 synthase III	NA	975	0	0	0	1	1	0	0	1		GATTAGCTTGATGAGGAATAAAAAGATCAATTTCTTGTGCTAAAATGTTAT
336689	'+'	1	1	13.04	>100	36.16	1	CJE0374	putative glycerol-3-phosphate acyltransferase PlsX	NA	987	0	0	0	1	1	0	0	1		CCACCCATTGCATCAATGGCAATGTTAATCATTGATTTTAATATTCCTTAG
336689	'+'	1	1	13.04	>100	36.16	1	CJE0375	50S ribosomal protein L32	NA	147	0	0	0	1	1	0	0	1		CCACCCATTGCATCAATGGCAATGTTAATCATTGATTTTAATATTCCTTAG
337079	'-'	1	1	219.81	2.35	6.92	2	CJE0375	50S ribosomal protein L32	257	147	1	0	0	0	1	0	0	0		TTGAGGGAAATTTAGTAAAAATAAATCCTAAGCTTGTTAAAATAAATGCTA
337079	'-'	1	1	219.81	2.35	6.92	2	CJE0376	hypothetical protein	NA	354	0	0	1	0	1	0	0	0		TTGAGGGAAATTTAGTAAAAATAAATCCTAAGCTTGTTAAAATAAATGCTA
337084	'-'	1	1	39.46	8.75	2.11	2	CJE0375	50S ribosomal protein L32	262	147	0	1	0	0	1	0	0	0		GATTTTTGAGGGAAATTTAGTAAAAATAAATCCTAAGCTTGTTAAAATAAA
337084	'-'	1	1	39.46	8.75	2.11	2	CJE0376	hypothetical protein	NA	354	0	0	1	0	1	0	0	0		GATTTTTGAGGGAAATTTAGTAAAAATAAATCCTAAGCTTGTTAAAATAAA
337642	'-'	1	1	588.15	67	9.64	1	CJE0377	nucleoside diphosphate kinase	29	414	1	0	0	0	1	0	0	0		TTTTTCTTTTAATTTAACTTTCTTTAAACAAATTCAAGTATAATTTTAAGC
338186	'+'	1	1	1956.67	>100	2.95	1	CJE0379	anti-oxidant AhpCTSA family protein	30	597	1	0	0	0	1	0	0	0		TATTTTAGATATTTAAAAAAAAATAAAGATTTAAACGATATAATTTCGTTA
338899	'+'	1	1	95.9	11.76	5.47	1	CJE0380	flagellar biosynthesis protein FlhB	32	1089	1	0	0	0	1	0	0	0		TCATTTTTATTCTTTAATTGAAATTCATAAATTTTCTACTATAATTTTACA
340750	'-'	1	1	582.63	6.94	8.09	1	CJE0381	flagellar motor protein MotB	NA	744	0	0	1	0	1	0	0	0		CCAAGAATTTCACAATTTGACAAAGGTTAAAAATGGCTAAAAAACATAAAT
341281	'-'	1	1	205.81	8.35	2.89	1	CJE0382	flagellar motor protein MotA	NA	777	0	0	1	0	1	0	0	0		AATTTACCCGAAAGGATAGCCCAGTTAATAGAATTTGCTATTATTGCAAGA
341617	'-'	1	1	48.8	9.21	4.05	2	CJE0382	flagellar motor protein MotA	70	777	1	0	0	0	1	0	0	0		ATTTTGTAAAAAAAACTAGAGATATTATGGAAAATATAGTAAAATTAAAAG
341617	'-'	1	1	48.8	9.21	4.05	2	CJE0383	DNA polymerase I	NA	2640	0	0	1	0	1	0	0	0		ATTTTGTAAAAAAAACTAGAGATATTATGGAAAATATAGTAAAATTAAAAG
343462	'-'	1	1	24.19	3.19	8.08	1	CJE0383	DNA polymerase I	NA	2640	0	0	1	0	1	0	0	0		AAAATGCATTTTTAAGCAAAAAATTAGCTTCTTTGTATGACAATTTAGAAG
343639	'-'	1	1	148.95	5.18	5.18	1	CJE0383	DNA polymerase I	NA	2640	0	0	1	0	1	0	0	0		TCAGAGATTTTTTAGCTCTTTGTGGGGATAGTTCTGATAATATTCCAGGCG
343679	'-'	1	0	25.04	8	1.67	1	CJE0383	DNA polymerase I	NA	2640	0	0	1	0	1	0	0	0		GCAGCGTGTTTAGAAAAATACGGAGTAAAACCTAATCAAATCAGAGATTTT
344231	'+'	1	1	40.31	2.38	7.11	2	CJE0384	major facilitator family transporter	136	1362	0	1	0	0	1	0	0	1		TCAATAATAGTTAAAGTTTTCATAATAATTTCTTTTTTTGATAAAATATAT
344231	'+'	1	1	40.31	2.38	7.11	2	CJE0383	DNA polymerase I	NA	2640	0	0	0	1	1	0	0	1		TCAATAATAGTTAAAGTTTTCATAATAATTTCTTTTTTTGATAAAATATAT
344326	'+'	1	1	386.16	5.44	8.91	1	CJE0384	major facilitator family transporter	41	1362	1	0	0	0	1	0	0	0		ATTTAAAGATATTTAAGCGAAAATACTCCAATTTTTAGTCATAATTATAGA
346843	'-'	1	1	2.55	2.2	4.64	1	CJE0386	hypothetical protein	NA	444	0	0	1	0	1	0	0	0		CCTTAAAAAAATTAGAAAATTTCAATGCTAATTTTGCTAAATTTGGAAGTA
347104	'-'	1	1	26.73	>100	7.73	1	CJE0386	hypothetical protein	NA	444	0	0	1	0	1	0	0	0		TTAATGCGTAAAAAAGAGTTTTAATGTTTGATTTTTTATATAATGATATTA
347573	'-'	1	1	3.82	>100	6.58	1	CJE0387	hypothetical protein	NA	597	0	0	1	0	1	0	0	0		TAGCCTTTATGAATTACCACCGCAAAACCTTCAAATGCTAAATTTAGCTGA
347774	'+'	1	1	4.24	3.5	7.67	1	CJE0387	hypothetical protein	NA	597	0	0	0	1	1	0	0	1		TCATTGGATAAAAGCTTTAAATTTGGGATAAATTTGATATTTTGGTTTTTA
347774	'+'	1	1	4.24	3.5	7.67	1	CJE0388	hypothetical protein	NA	684	0	0	0	1	1	0	0	1		TCATTGGATAAAAGCTTTAAATTTGGGATAAATTTGATATTTTGGTTTTTA
351139	'-'	1	0	6.72	3.5	1.7	1	CJE0390	excinuclease ABC subunit A	NA	2823	0	0	1	0	1	0	0	0		CTTGAAATTCAAGAAGATTTACTTTCTCGTCTTGCAAGCGATATAGAAAAA
351839	'-'	1	1	26.73	2.18	11.03	1	CJE0390	excinuclease ABC subunit A	29	2823	1	0	0	0	1	0	0	0		TTTTTAACTTGGATTTATCCAAGTTCTTTTAATATTATTATGCTAAAATCT
351848	'-'	1	1	31.83	76	27.47	1	CJE0390	excinuclease ABC subunit A	38	2823	0	1	0	0	1	0	0	0		TTTTATAAATTTTTAACTTGGATTTATCCAAGTTCTTTTAATATTATTATG
352436	'-'	1	0	5.52	4.33	0.89	1	CJE0391	hypothetical protein	NA	786	0	0	1	0	1	0	0	0		TATTAATTATAAGAAAAAAAATCTAAATCTTAAAGATGGTATTATGATAGG
352488	'+'	1	1	9.09	>100	7.36	2	CJE0392	hypothetical protein	280	114	1	0	0	0	1	0	0	1		TATCATAATACCATCTTTAAGATTTAGATTTTTTTTCTTATAATTAATATA
352488	'+'	1	1	9.09	>100	7.36	2	CJE0391	hypothetical protein	NA	786	0	0	0	1	1	0	0	1		TATCATAATACCATCTTTAAGATTTAGATTTTTTTTCTTATAATTAATATA
352703	'-'	1	1	201.99	>100	9.4	2	CJE0391	hypothetical protein	35	786	1	0	0	0	1	0	0	1		TGTTATAAAAAACTAAGATAATACTTAGCTTAATAAGATAAAATTATTCCG
352703	'-'	1	1	201.99	>100	9.4	2	CJE0392	hypothetical protein	NA	114	0	0	0	1	1	0	0	1		TGTTATAAAAAACTAAGATAATACTTAGCTTAATAAGATAAAATTATTCCG
352813	'-'	1	1	8.91	2.5	20.73	2	CJE0391	hypothetical protein	145	786	0	1	0	0	1	0	0	1		TAAATATAAATTTTGCTTTAAATTTAAAATAAATATTATAAAATCTTTATA
352813	'-'	1	1	8.91	2.5	20.73	2	CJE0392	hypothetical protein	NA	114	0	0	0	1	1	0	0	1		TAAATATAAATTTTGCTTTAAATTTAAAATAAATATTATAAAATCTTTATA
352881	'+'	1	1	3247.54	>100	10.07	2	CJE0392	hypothetical protein	NA	114	0	0	1	0	1	0	0	1		TTTATTTTAAATTTAAAGCAAAATTTATATTTATTGATTAAAATTAATTAA
352881	'+'	1	1	3247.54	>100	10.07	2	CJE0393	hypothetical protein	NA	99	0	0	0	1	1	0	0	1		TTTATTTTAAATTTAAAGCAAAATTTATATTTATTGATTAAAATTAATTAA
354990	'-'	1	1	6.72	>100	12.42	1	CJE0395	anthranilate synthase component II	NA	1602	0	0	0	1	1	0	0	1		AACAAAGCCGCTACTTGTAAAATTTCATAATCTTTAGACATAATAATCTTA
355200	'-'	1	1	9.09	>100	25.2	1	CJE0395	anthranilate synthase component II	NA	1602	0	0	0	1	1	0	0	1		CGATTTCCGTGTTTGGCTACTTTTACTCCTAAAGCTGCTAAAATAAAAGCA
357265	'+'	1	1	31.4	25.67	6.23	1	CJE0397	tryptophan synthase subunit beta	NA	1179	0	0	1	0	1	0	0	0		CTGGGATTTTTTATGATTTTATCAAAGATGAAAATGTTAAACTTATAGGTA
358105	'+'	1	1	4.67	>100	5.78	1	CJE0398	tryptophan synthase subunit alpha	NA	750	0	0	1	0	1	0	0	0		TTTGAAGAAAGTGATGATTTAATTAAAGAGTGTGAAAGATATAATATAGCT
358474	'+'	1	1	28.01	12.67	3.26	1	CJE0399	hypothetical protein	32	423	0	1	0	0	1	0	0	0		TTCAAAAAATAAAATTTTAAAACATATTTTTATTTTATATTTACTATAATT
358479	'+'	1	1	479.51	2.44	5.52	1	CJE0399	hypothetical protein	27	423	1	0	0	0	1	0	0	0		AAAATAAAATTTTAAAACATATTTTTATTTTATATTTACTATAATTTTAAA
359494	'-'	1	1	181.62	22.4	9.62	1	CJE0401	hypothetical protein	NA	798	0	0	0	1	1	0	0	1		GAGCTAAGTTCTAAATTAATATTTTGTTTGTTTTGTAGTATAATATAGGTA
359498	'-'	1	1	8.06	>100	3.65	1	CJE0401	hypothetical protein	NA	798	0	0	0	1	1	0	0	1		GATAGAGCTAAGTTCTAAATTAATATTTTGTTTGTTTTGTAGTATAATATA
359684	'-'	1	1	62.38	10.8	8.84	1	CJE0401	hypothetical protein	NA	798	0	0	0	1	1	0	0	1		CACTATTAACAAAATAACTAAAATTAGCATTACTAAGATATAATTTGTATA
361027	'-'	1	1	94.35	21.21	6.14	1	CJE0402	Ppx%2FGppA family phosphatase	NA	1461	0	0	1	0	1	0	0	0		GGTGGTGGTTCTAGTGAATTGTGTTTAATAAAAAATAATAGAATTATTTCT
361765	'-'	1	1	123.49	4.34	4.37	1	CJE0403	ferredoxin%2C 4Fe-4S	29	246	1	0	0	0	1	0	0	0		TTATTTCTATTTTTATATTTTATTTAAGTTTGGTTATTGTATAAACTAAAA
361806	'+'	1	1	2.97	4	18.8	1	CJE0403	ferredoxin%2C 4Fe-4S	NA	246	0	0	0	1	1	0	0	1		AAAAAATAATTTTAGTTTATACAATAACCAAACTTAAATAAAATATAAAAA
361806	'+'	1	1	2.97	4	18.8	1	CJE0404	DNA-binding response regulator	NA	672	0	0	0	1	1	0	0	1		AAAAAATAATTTTAGTTTATACAATAACCAAACTTAAATAAAATATAAAAA
362953	'-'	1	0	15.28	22	0.92	2	CJE0405	FolB domain-containing protein	37	318	1	0	0	0	1	0	0	0		TCATACACATGCACCCGTTTTCATTATCGCTTTTATTATAGTATATAAACA
362953	'-'	1	0	15.28	22	0.92	2	CJE0406	putative glycerol-3-phosphate acyltransferase PlsY	NA	609	0	0	1	0	1	0	0	0		TCATACACATGCACCCGTTTTCATTATCGCTTTTATTATAGTATATAAACA
362976	'+'	1	1	33.98	45	5.67	1	CJE0405	FolB domain-containing protein	NA	318	0	0	0	1	1	0	0	1		AAAATCAATCTTTTAATATTAGGTAGATGTTTATATACTATAATAAAAGCG
362976	'+'	1	1	33.98	45	5.67	1	CJE0406	putative glycerol-3-phosphate acyltransferase PlsY	NA	609	0	0	0	1	1	0	0	1		AAAATCAATCTTTTAATATTAGGTAGATGTTTATATACTATAATAAAAGCG
363550	'-'	1	1	291.97	3.3	8.98	1	CJE0406	putative glycerol-3-phosphate acyltransferase PlsY	41	609	1	0	0	0	1	0	0	0		CTTAAAAATTATTTTTTTGTTTATTTATTTTTATAAGATATAATTTTTGGT
363669	'-'	1	1	3.39	>100	6.58	2	CJE0406	putative glycerol-3-phosphate acyltransferase PlsY	160	609	0	1	0	0	1	0	0	1		TTACTTTCATTTATAAACTCCTATTAAAGATAAATTAAAATAAAATAATAA
363669	'-'	1	1	3.39	>100	6.58	2	CJE0407	cytochrome c551 peroxidase	NA	1026	0	0	0	1	1	0	0	1		TTACTTTCATTTATAAACTCCTATTAAAGATAAATTAAAATAAAATAATAA
363680	'+'	1	1	381.06	3.24	6.99	1	CJE0407	cytochrome c551 peroxidase	30	1026	1	0	0	0	1	0	0	0		TTTTTTAATAATATTTATCTTTATTTAAGCTCTAAATAATTATTATTTTAT
363950	'+'	1	1	819.42	4.49	7.73	1	CJE0407	cytochrome c551 peroxidase	NA	1026	0	0	1	0	1	0	0	0		AAAAGCTTTATTTTGAACCACGCCTTTCAAAAAGTGGTATCATTTCTTGTA
364062	'-'	1	1	16.13	>100	5.78	1	CJE0407	cytochrome c551 peroxidase	NA	1026	0	0	0	1	1	0	0	1		GATCGGCTAATGTTCCTGCACGACCATCCCAAAATTGAGTATTATTTAAAA
364806	'+'	1	1	53.04	6.11	2.33	2	CJE0409	phosphoglucosamine mutase	23	1338	1	0	0	0	1	0	0	1		TTTAGAGCTTGTTTAAATTTCTTTATCTTAGCTTTGTTATAATTGTCTTTA
364806	'+'	1	1	53.04	6.11	2.33	2	CJE0408	hypothetical protein	NA	111	0	0	0	1	1	0	0	1		TTTAGAGCTTGTTTAAATTTCTTTATCTTAGCTTTGTTATAATTGTCTTTA
365041	'+'	1	1	27.58	9	2.25	1	CJE0409	phosphoglucosamine mutase	NA	1338	0	0	1	0	1	0	0	0		ATAGAAAATGCTATTGTTTCAGGGCTTACTTCTATAGGATATAATGTTATA
367027	'+'	1	1	226.6	>100	6.09	2	CJE0411	hypothetical protein	NA	453	0	0	1	0	1	0	0	1		AAAGTGGAAAATATTTTAGAATTTATAATGAATTTCCAACTATAATGTTTA
367027	'+'	1	1	226.6	>100	6.09	2	CJE0412	coproporphyrinogen III oxidase	NA	1371	0	0	0	1	1	0	0	1		AAAGTGGAAAATATTTTAGAATTTATAATGAATTTCCAACTATAATGTTTA
368436	'-'	1	1	25.46	11.33	7.45	1	CJE0412	coproporphyrinogen III oxidase	27	1371	1	0	0	0	1	0	0	0		GAAATAAAAAATTTACTCCTATTTTAGCTAAAAATTGATAAAGTTATGTCT
369224	'+'	1	1	27.26	>100	5.44	1	CJE0414	RND efflux system%2C outer membrane lipoprotein CmeC	NA	1479	0	0	0	1	1	0	0	1		TTCATCTTTATTAAGCTTAGCTAAATTTACATTTTGGTAAATTTCACCCCA
371488	'+'	1	1	3.56	13	7.31	1	CJE0415	RND efflux system%2C inner membrane transporter CmeB	NA	3123	0	0	0	1	1	0	0	1		GCATTGCGATCAAAAGCAAATTTTTTATTAAGTTCGGCTATAATTTGATCA
372334	'-'	1	1	5.09	7	4.05	1	CJE0415	RND efflux system%2C inner membrane transporter CmeB	NA	3123	0	0	1	0	1	0	0	0		GAAGTTGTTAAAACTTTTGTTGAAGCTCTAATTTTAGTTATCATTGTTATG
372941	'+'	1	1	27.16	>100	6.93	1	CJE0415	RND efflux system%2C inner membrane transporter CmeB	NA	3123	0	0	0	1	1	0	0	1		CTGGAACCCTTTTTAACTCATCTAAAACATTTAAAGTGATATAGTTATATA
375496	'+'	1	1	7.9	>100	14.61	1	CJE0418	iron-sulfur cluster-binding domain-containing protein	NA	1377	0	0	0	1	1	0	0	1		ATTTCAATTCCATCATTTATTCCTTCTAAATTTGCTGTAAAATAATATTCA
375589	'+'	1	1	23.34	7.87	7.84	1	CJE0418	iron-sulfur cluster-binding domain-containing protein	NA	1377	0	0	0	1	1	0	0	1		TTTGAAATGACTAATTCACCTTTAACATTTGAAATATTATATAATTCACTA
376097	'+'	1	1	3.16	8	5.78	1	CJE0418	iron-sulfur cluster-binding domain-containing protein	NA	1377	0	0	0	1	1	0	0	1		AGGTAATATCCAAAGTAAAAAGTAAGCTAGCACAAAATAAAATTCCAAGTA
376631	'-'	1	1	261.54	2.3	8.82	1	CJE0418	iron-sulfur cluster-binding domain-containing protein	35	1377	1	0	0	0	1	0	0	0		AGAAAGCATTTAAAAATTGTTTTAGTTTTTATCGGTTATAATCCTTAATTA
376719	'+'	1	1	25077.3	73.53	9.85	1	CJE0419	30S ribosomal protein S21	37	213	1	0	0	0	1	0	0	0		TTAAATGCTTTCTAAGTTAGAATTAATAAGAAGTGTTTTATAATTATATTT
377051	'+'	1	1	27.58	66	3.4	1	CJE0420	hypothetical protein	37	606	0	1	0	0	1	0	0	0		CAAACTTCATTTGGTATTAAATTAAAAAGTATTTATTATTTTTTGTTAAAA
377058	'+'	1	1	88.26	2.32	4.24	1	CJE0420	hypothetical protein	30	606	1	0	0	0	1	0	0	0		CATTTGGTATTAAATTAAAAAGTATTTATTATTTTTTGTTAAAATTTCTAA
377323	'-'	1	1	3.56	>100	>100	1	CJE0420	hypothetical protein	NA	606	0	0	0	1	1	0	0	1		CTTCTTCTTTAATCAAAGCATCCATTTCTTCTTTGGATAAAATTCTTTCTG
378667	'+'	1	1	161.25	26.33	6.88	2	CJE0422	2-hydroxyacid dehydrogenase	208	936	1	0	0	0	1	0	0	0		TAAAAAACCTGTTTTTGGTAGAGAAGGTGCAAATATCAGTATAATTAAAGA
378667	'+'	1	1	161.25	26.33	6.88	2	CJE0421	glutathionylspermidine synthase family protein	NA	1170	0	0	1	0	1	0	0	0		TAAAAAACCTGTTTTTGGTAGAGAAGGTGCAAATATCAGTATAATTAAAGA
379478	'+'	1	1	53.98	75.5	5.7	1	CJE0422	2-hydroxyacid dehydrogenase	NA	936	0	0	1	0	1	0	0	0		TTGTACATTTGGAATTAAAAGATTTATTAAAAACTTGCGATATTATAAGTA
379761	'-'	1	1	4.67	7	20.24	1	CJE0422	2-hydroxyacid dehydrogenase	NA	936	0	0	0	1	1	0	0	1		TTCACTTGCCATTTTCTATCCATTCTTTTAAATTATTATAAACTATATCCA
379761	'-'	1	1	4.67	7	20.24	1	CJE0423	putative nucleotide-binding protein	NA	492	0	0	0	1	1	0	0	1		TTCACTTGCCATTTTCTATCCATTCTTTTAAATTATTATAAACTATATCCA
380742	'+'	1	1	94.63	>100	7.26	2	CJE0425	hypothetical protein	45	825	1	0	0	0	1	0	0	0		TTTTTATCAAGTTTGTGATAATAAAGTAAGTTTTTTTGATAAAATTTCACA
380742	'+'	1	1	94.63	>100	7.26	2	CJE0424	putative lipoprotein	NA	477	0	0	1	0	1	0	0	0		TTTTTATCAAGTTTGTGATAATAAAGTAAGTTTTTTTGATAAAATTTCACA
381023	'+'	1	1	154.87	66.33	4.93	1	CJE0425	hypothetical protein	NA	825	0	0	1	0	1	0	0	0		GATATAAATGGAAATTTAGAGATTCCGCTCGTTAAGACAAATGATTTTTGG
381758	'-'	1	1	12.64	2.68	13.59	1	CJE0426	ATPase%2C AAA family protein	NA	1713	0	0	0	1	1	0	0	1		AGCATCAAGATAAAGATACTTATCATTTCCAAAAATTGTCGATAATAAAGT
382549	'-'	1	1	1.7	>100	8.77	1	CJE0426	ATPase%2C AAA family protein	NA	1713	0	0	0	1	1	0	0	1		TTTAAAATATTTTCTAAAAGCTCTTTTGTATTTTCAGGCATAATAATATCA
383146	'-'	1	1	26.31	47	19.95	1	CJE0426	ATPase%2C AAA family protein	NA	1713	0	0	0	1	1	0	0	1		ACCATTAAAATTTGTGCTCCACTTAATTCATAATTTGATAAAATATTTATA
383158	'+'	1	1	36.07	>100	2.35	1	CJE0426	ATPase%2C AAA family protein	NA	1713	0	0	1	0	1	0	0	0		TTTCTACCTAAAAAAGCATTATTTGAAAAAGATTTTGATATAAATATTTTA
383800	'+'	1	1	9.76	>100	13.15	1	CJE0427	hypothetical protein	NA	573	0	0	0	1	1	0	0	1		AATATAGGCTTCTTTTACAAAATCAAAGGCTTTTATGATATGATAAAAGCC
383800	'+'	1	1	9.76	>100	13.15	1	CJE0428	putative sulfite oxidase subunit YedY	NA	894	0	0	0	1	1	0	0	1		AATATAGGCTTCTTTTACAAAATCAAAGGCTTTTATGATATGATAAAAGCC
384855	'+'	1	1	3.82	>100	17.53	1	CJE0429	hypothetical protein	NA	801	0	0	0	1	1	0	0	1		AGGATTAATTTTGTGTGATTTTTTCAAGTTCTATATTGTAGAATATTTCTT
386705	'+'	1	1	9.34	>100	31.81	1	CJE0431	transcription antitermination protein NusB	NA	399	0	0	0	1	1	0	0	1		GTTTAAATTATCTAAAATTCCATTATATAAATTTAAAGTAAAATTTTTTTG
388145	'-'	1	1	1051.72	39.79	7.62	2	CJE0433	2-dehydro-3-deoxyphosphooctonate aldolase	44	816	1	0	0	0	1	0	0	0		TTTTGGGAGATAATTTACCAAGTACTATGGTTTTTTTAGGTATAATAGGCA
388145	'-'	1	1	1051.72	39.79	7.62	2	CJE0434	integral membrane protein	NA	933	0	0	1	0	1	0	0	0		TTTTGGGAGATAATTTACCAAGTACTATGGTTTTTTTAGGTATAATAGGCA
389052	'-'	1	1	15.01	39	2.44	2	CJE0434	integral membrane protein	22	933	1	0	0	0	1	0	0	1		TTATATAAAATTTGGCTTAATATTAAGCAAAAAAAGACTAGAATTAACCCA
389052	'-'	1	1	15.01	39	2.44	2	CJE0435	GTP-binding protein EngA	NA	1383	0	0	0	1	1	0	0	1		TTATATAAAATTTGGCTTAATATTAAGCAAAAAAAGACTAGAATTAACCCA
389107	'+'	1	1	65.35	>100	4.49	2	CJE0435	GTP-binding protein EngA	25	1383	1	0	0	0	1	0	0	1		TAATTCTAGTCTTTTTTTGCTTAATATTAAGCCAAATTTTATATAATTTTA
389107	'+'	1	1	65.35	>100	4.49	2	CJE0434	integral membrane protein	NA	933	0	0	0	1	1	0	0	1		TAATTCTAGTCTTTTTTTGCTTAATATTAAGCCAAATTTTATATAATTTTA
390148	'+'	1	1	81.39	26.75	5.33	1	CJE0435	GTP-binding protein EngA	NA	1383	0	0	1	0	1	0	0	0		GATAAGACTGTAAAAGAATTGCGTCTTGATCGTTTTAAATTTCTAGCTTAC
390333	'+'	1	1	19.52	>100	2.42	2	CJE0436	shikimate kinase	168	498	1	0	0	0	1	0	0	0		AAGAGCACATCCTTTGCCGCATGATTATGGGAAATTGGTTAAAATTTATTA
390333	'+'	1	1	19.52	>100	2.42	2	CJE0435	GTP-binding protein EngA	NA	1383	0	0	1	0	1	0	0	0		AAGAGCACATCCTTTGCCGCATGATTATGGGAAATTGGTTAAAATTTATTA
390902	'+'	1	1	170.16	>100	9.3	2	CJE0437	tryptophanyl-tRNA synthetase	93	960	1	0	0	0	1	0	0	0		AGACCTTTATTTTATGATGAAATTAAAGCAAAAAAATTATATAATGAGCGT
390902	'+'	1	1	170.16	>100	9.3	2	CJE0436	shikimate kinase	NA	498	0	0	1	0	1	0	0	0		AGACCTTTATTTTATGATGAAATTAAAGCAAAAAAATTATATAATGAGCGT
391529	'+'	1	1	5.09	5	2.19	1	CJE0437	tryptophanyl-tRNA synthetase	NA	960	0	0	1	0	1	0	0	0		ATGAATGGGGTGAAATTTTTACCCTTCCAGAAGCGAGAGTTAATGAAGAAG
393562	'-'	1	1	5.52	4.25	12.29	1	CJE0439	TPR domain-containing protein	NA	2463	0	0	0	1	1	0	0	1		CATCAGGCATAATAACAGGTTGTTCTAAAGTCTTAGAAGCTATAATATCTG
393914	'+'	1	0	4.24	2.25	1.3	1	CJE0439	TPR domain-containing protein	NA	2463	0	0	1	0	1	0	0	0		GTTTGTGCTTTAAAGCTTAATGATAAGGAAAAATTTAGATATTATATTGAT
394899	'-'	1	1	1.27	>100	4.34	1	CJE0439	TPR domain-containing protein	NA	2463	0	0	0	1	1	0	0	1		ATTAACTAAAAATAACATACTTTTTTGCATATTAGCTTTAAAATTAGAATC
394947	'+'	1	1	14	17.5	2.81	1	CJE0439	TPR domain-containing protein	NA	2463	0	0	1	0	1	0	0	0		CTGATTCTAATTTTAAAGCTAATATGCAAAAAAGTATGTTATTTTTAGTTA
395715	'+'	1	1	42.43	>100	6.15	1	CJE0440	hypothetical protein	NA	636	0	0	0	1	1	0	0	1		ACAACTAAAAATGCTTAGAAATTTCTAAGCATTTTTAGTTAAGCTTGAAGA
396360	'-'	1	1	3251.78	13.84	8.1	1	CJE0440	hypothetical protein	22	636	1	0	0	0	1	0	0	0		GAATTTAATGTCCTTATAAATTTTTTAAGTCAAAAGTCGATATAAATTAAA
396455	'+'	1	1	128.01	3.81	5.81	1	CJE0441	pyruvate kinase	NA	1443	0	0	0	1	1	0	0	1		AAATTCCTTATTTTCAAAGGAATTTAATGTTTTATTGTAGATAATAAGTAA
397144	'-'	1	1	64.4	21.38	3.64	1	CJE0441	pyruvate kinase	NA	1443	0	0	1	0	1	0	0	0		GTAGAAAATATTGATGAGATTATTAAATCTAGCGATGGTATAATGGTTGCA
397261	'+'	1	1	34.77	17	15.97	1	CJE0441	pyruvate kinase	NA	1443	0	0	0	1	1	0	0	1		ATTTTTGCAAAAATAGATATTTTTGCGTTATTTTGTGCTAAAATTTCACGA
399442	'-'	1	0	2.55	4	0.81	2	CJE0442	malate:quinone oxidoreductase%2C putative	169	1347	1	0	0	0	1	0	0	0		CAATTTTTAGCAAATTATTTCGATCACGCAATTTATGATAAACTTTTAATC
399442	'-'	1	0	2.55	4	0.81	2	CJE0443	pantothenate kinase	NA	630	0	0	1	0	1	0	0	0		CAATTTTTAGCAAATTATTTCGATCACGCAATTTATGATAAACTTTTAATC
399815	'-'	1	0	7.51	17	1.35	1	CJE0443	pantothenate kinase	NA	630	0	0	1	0	1	0	0	0		AAAAAAATTTATCAATCTTGAACCTTATTTTTTATTTGATACAATTTATCA
399973	'+'	1	1	3.39	2.5	3.65	1	CJE0443	pantothenate kinase	NA	630	0	0	0	1	1	0	0	1		TCATTTTTAAATTCTAAAAACTGATCTATACTAAGAGTAAAATATTTGTTA
399973	'+'	1	1	3.39	2.5	3.65	1	CJE0444	tram-like protein	NA	291	0	0	0	1	1	0	0	1		TCATTTTTAAATTCTAAAAACTGATCTATACTAAGAGTAAAATATTTGTTA
401046	'+'	1	1	5.94	4.5	>100	1	CJE0445	putative lipoprotein	NA	999	0	0	0	1	1	0	0	1		ATTGTCAAAAATTTTTAAATTTCCATTATTATCTGCAGTAAAATATTCCCC
401484	'+'	1	1	6.72	>100	10.96	1	CJE0446	hypothetical protein	NA	579	0	0	0	1	1	0	0	1		TTTTTTAAAAATATTGATTTATCTCCTAAAGATAATGCAATAATATTTTTA
[truncated: 2,144 more rows]

## Sheet: 81116
Table S4. TSS detected in the individual C. jejuni strains - 81116.
[truncated: 2,492 more rows]

## Sheet: 81-176
Table S4. TSS detected in the individual C. jejuni strains - 81-176.
[truncated: 2,577 more rows]
