# Supplementary material for: High-Resolution Transcriptome Maps Reveal Strain-Specific Regulatory Features of Multiple Campylobacter jejuni Isolates
Source: PLoS Genet. 2013 May 16;9(5):e1003495. doi: 10.1371/journal.pgen.1003495 (PMC3656092; doi:10.1371/journal.pgen.1003495)
Supplement: Table S5 — TSS detected on the pVir and pTet plasmids of C. jejuni 81–176. This table contains information on positions and class assignments of all TSS detected for the two plasmids of C. jejuni 81–176. We did not classify these TSS as being enriched or not. Instead the enrichment factor is provided in the table for each TSS, which allows for customized filtering. A detailed description of the individual columns of this table is listed as an extended legend in Text S1. (XLS) [file pgen.1003495.s005.xls]

## Sheet: pVir
Table S5. TSS detected in pVir and pTet of C. jejuni 81-176.
This table lists all TSS that were detected in pVir of C. jejuni 81-176. We did not classify these TSS as being enriched or not. Instead the enrichment factor is provided in the table for each TSS, which allows for customized filtering.
Pos	Strand	stepHeight	stepFactor	enrichmentFactor	classCount	Locus_tag	Product	UTRlength	GeneLength	Primary	Secondary	Internal	Antisense	Automated	Manual	Putative sRNA	Putative asRNA	Comment	Sequence -50 nt upstream + TSS (51nt)
818	-'	9.13	>100	3.43	1	CJJ81176_pVir0002	VirB9	NA	1071	0	0	0	1	1	0	0	1		CCTTGATTTCCTAAAGGATCTATTTTGATATTGGTTTGTGTATAATTATTT
1842	-'	41.07	4.15	2.08	1	CJJ81176_pVir0002	VirB9	NA	1071	0	0	0	1	1	0	0	1		TGTTAAGCAAATTTTGGCTTTGATTGTCTTTTTTAGATATATTTTTAGATA
1842	-'	41.07	4.15	2.08	1	CJJ81176_pVir0003	VirB10	NA	1137	0	0	0	1	1	0	0	1		TGTTAAGCAAATTTTGGCTTTGATTGTCTTTTTTAGATATATTTTTAGATA
2035	-'	35.2	51	6.75	1	CJJ81176_pVir0003	VirB10	NA	1137	0	0	0	1	1	0	0	1		TTTTGTATCAGTTCTTGCTTTTTTTCTTCAATTTTTGCTAACTTAGTAATA
3105	-'	12.38	>100	9.7	1	CJJ81176_pVir0004	hypothetical protein	NA	201	0	0	0	1	1	0	0	1		TTTGCTTCCATTTCTAAGTAAGGTTTTAAAACATTTAAAATATTATTTAAA
3105	-'	12.38	>100	9.7	1	CJJ81176_pVir0005	conjugative transfer regulon protein	NA	954	0	0	0	1	1	0	0	1		TTTGCTTCCATTTCTAAGTAAGGTTTTAAAACATTTAAAATATTATTTAAA
3940	-'	7.55	4.25	>100	1	CJJ81176_pVir0005	conjugative transfer regulon protein	NA	954	0	0	0	1	1	0	0	1		AATATCTCTAGTCCCTGTTTTTTTATTTCTCGAAATTTGTATAATAAAATC
4811	+'	247.69	5.37	6.01	1	CJJ81176_pVir0007	hypothetical protein	NA	1887	0	0	1	0	1	0	0	0		ATGAATATTTGCAATGATAGGGGTTTAATTTTAGGTTGTAATATTAAAAAA
5370	+'	9.13	>100	5.36	1	CJJ81176_pVir0007	hypothetical protein	NA	1887	0	0	1	0	1	0	0	0		TAATTGAAGATGAAGACACAGGAGAAGTTTCAAGAGATTATAATGTAGATA
6002	-'	382.07	>100	7.35	1	CJJ81176_pVir0007	hypothetical protein	NA	1887	0	0	0	1	1	0	0	1		ATATCTTGTGAAGTTATCAATTTATAACCTTCTTTGGATACAGTGTTATTA
6420	-'	48.24	>100	5.47	1	CJJ81176_pVir0007	hypothetical protein	NA	1887	0	0	0	1	1	0	0	1		TCTATGCTTGCCATTATTGCTCCTTTTTTGTATTTAGGCTATAATTTTTCA
6420	-'	48.24	>100	5.47	1	CJJ81176_pVir0008	hypothetical protein	NA	171	0	0	0	1	1	0	0	1		TCTATGCTTGCCATTATTGCTCCTTTTTTGTATTTAGGCTATAATTTTTCA
7280	+'	10.43	5	1.38	1	CJJ81176_pVir0009	hypothetical protein	NA	882	0	0	1	0	1	0	0	0		GATGGTAAGCCTATGTTTGAAATCGTAACGGAAAAGATTTATCATAAAACA
7721	-'	13.04	11	5.37	1	CJJ81176_pVir0010	hypothetical protein	NA	270	0	0	0	1	1	0	0	1		TTTAATCCTAAAAACTTGATAAATTCTGCCAAAACTCCTAACATTTATACT
7788	+'	8.13	5.67	1.32	2	CJJ81176_pVir0011	hypothetical protein	219	1149	1	0	0	0	1	0	0	0		TTTTGGCAGAATTTATCAAGTTTTTAGGATTAAACAATGAAACTAATTTTA
7788	+'	8.13	5.67	1.32	2	CJJ81176_pVir0010	hypothetical protein	NA	270	0	0	1	0	1	0	0	0		TTTTGGCAGAATTTATCAAGTTTTTAGGATTAAACAATGAAACTAATTTTA
8295	-'	7.17	>100	5.61	1	CJJ81176_pVir0011	hypothetical protein	NA	1149	0	0	0	1	1	0	0	1		TATAAGTCCTGCAGTAGCTGATTTTAACCATTGTGCTGGTATCATTAGCCA
8417	+'	206.71	2.34	11.68	1	CJJ81176_pVir0011	hypothetical protein	NA	1149	0	0	1	0	1	0	0	0		GGAAATCAAGTTACAAATGCTTTTAATTCTTTAAATGATATAATGGTTAGT
9113	+'	5.23	>100	2.7	2	CJJ81176_pVir0012	DNA topoisomerase I	64	1968	1	0	0	0	1	0	0	0		GATCTAAAAGGACAAAATTCTCAAACCAATTTAATTGATACAATGCAAGGA
9113	+'	5.23	>100	2.7	2	CJJ81176_pVir0011	hypothetical protein	NA	1149	0	0	1	0	1	0	0	0		GATCTAAAAGGACAAAATTCTCAAACCAATTTAATTGATACAATGCAAGGA
9269	-'	7.17	3.67	10.21	1	CJJ81176_pVir0012	DNA topoisomerase I	NA	1968	0	0	0	1	1	0	0	1		GGCTCGTAGTTTTCATATTCTTTTAAAAAGTTTTTACTTAAACTTTTAAAA
9805	+'	83.03	>100	5.02	1	CJJ81176_pVir0012	DNA topoisomerase I	NA	1968	0	0	1	0	1	0	0	0		ACTAGATTATAAAATTAAAGCAAAATTAGAAAAAGATGGTATAGTTTTTTA
10320	-'	8.13	>100	9.19	1	CJJ81176_pVir0012	DNA topoisomerase I	NA	1968	0	0	0	1	1	0	0	1		TTTGCTGATATTGGTTTTAAAACTTAAAATACCTATGTTAAAATCATAGCT
11323	+'	46.79	41.29	4.87	1	CJJ81176_pVir0013	hypothetical protein	28	366	1	0	0	0	1	0	0	0		AAAGGTATAGATTAAGTATAGATTAAGTATAAAAAAGGTATAATTATAATA
13126	+'	12.77	>100	3.03	1	CJJ81176_pVir0017	hypothetical protein	NA	480	0	0	1	0	1	0	0	0		AATTTAATGATGGAATTTGCAATGATGAGCAAGAAAGATTATTATAAAGAA
13536	-'	5.87	>100	13.78	1	CJJ81176_pVir0017	hypothetical protein	NA	480	0	0	0	1	1	0	0	1		TAACTCCTTTTTTTCTTGCTAACTAAAATTTTTTATGCAAAAATTTATATT
13536	-'	5.87	>100	13.78	1	CJJ81176_pVir0018	hypothetical protein	NA	354	0	0	0	1	1	0	0	1		TAACTCCTTTTTTTCTTGCTAACTAAAATTTTTTATGCAAAAATTTATATT
13680	+'	5.23	5.5	7.7	2	CJJ81176_pVir0019	hypothetical protein	252	126	1	0	0	0	1	0	0	0		GTTATCTATTTTGTTATCTATTGAAAGTCTAATTCCGTCAAAATATAATTA
13680	+'	5.23	5.5	7.7	2	CJJ81176_pVir0018	hypothetical protein	NA	354	0	0	1	0	1	0	0	0		GTTATCTATTTTGTTATCTATTGAAAGTCTAATTCCGTCAAAATATAATTA
13982	+'	10.43	17	3.25	2	CJJ81176_pVir0020	hypothetical protein	175	546	1	0	0	0	1	0	0	0		ATGAATTATAAAAAATTTCAAACAATGAGCAAAGAAGAATATTATAAGAAA
13982	+'	10.43	17	3.25	2	CJJ81176_pVir0019	hypothetical protein	NA	126	0	0	1	0	1	0	0	0		ATGAATTATAAAAAATTTCAAACAATGAGCAAAGAAGAATATTATAAGAAA
14265	+'	6.52	>100	3.21	1	CJJ81176_pVir0020	hypothetical protein	NA	546	0	0	1	0	1	0	0	0		AAATAGAAAGGTTTTTTATGCGTTTTGCAGAAGTTATATTATTATTTTTTA
14938	-'	30.77	2.89	6.86	1	CJJ81176_pVir0021	hypothetical protein	NA	414	0	0	0	1	1	0	0	1		CTTAATATCCCATACAAATTTGCTTTATTATCTTCTGTTAGAATGTGATAA
15082	+'	22.16	8.2	4.21	2	CJJ81176_pVir0022	hypothetical protein	27	408	1	0	0	0	1	0	0	0		CTTGATAAAAGTATTAATGAATTAGAAGATTATTCACGATATAGCATTTTA
15082	+'	22.16	8.2	4.21	2	CJJ81176_pVir0021	hypothetical protein	NA	414	0	0	1	0	1	0	0	0		CTTGATAAAAGTATTAATGAATTAGAAGATTATTCACGATATAGCATTTTA
16269	+'	54.75	3.58	3.89	1	orphan	orphan	NA	NA	0	0	0	0	1	0	0	0		AAATGTATATATTAAGTATATATTAAGTATAAAAAATGTATAATTATAAGA
16514	-'	32.59	26	3.06	1	orphan	orphan	NA	NA	0	0	0	0	1	0	0	0		GTTTTTTATATGATATTATAGTTTAGATATTTTTTATATTATAATTTCCTA
16611	+'	258.97	3.35	2.04	1	CJJ81176_pVir0025	para protein	31	669	1	0	0	0	1	0	0	0		AAACACATAAATAAAGTATATATTAAGTATAATATAGGTATAATATAGGTA
16981	+'	9.87	2.7	1.57	1	CJJ81176_pVir0025	para protein	NA	669	0	0	1	0	1	0	0	0		AAGAAATGAGATTTGCTTTAGCTTTAAGTGATATTGTTATCATTCCAATCA
17905	+'	19.74	5.25	1.68	2	CJJ81176_pVir0026	hypothetical protein	NA	630	0	0	1	0	1	0	0	1		TTAGTTTTGAAGAGCAAATGCAATTAACCAAAGAAGCTAATAATTATGATC
17905	+'	19.74	5.25	1.68	2	CJJ81176_pVir0027	RepE replication protein%2C putative	NA	837	0	0	0	1	1	0	0	1		TTAGTTTTGAAGAGCAAATGCAATTAACCAAAGAAGCTAATAATTATGATC
18830	-'	4440.46	24.51	5.26	1	CJJ81176_pVir0027	RepE replication protein%2C putative	21	837	1	0	0	0	1	0	0	0		TGATTGCAGTTTTAAAGAAAAAGTAAGTTACATATTGTTAAAATATTAAGA
18900	-'	9.87	2.25	14.7	1	CJJ81176_pVir0027	RepE replication protein%2C putative	91	837	0	1	0	0	1	0	0	0		GCTATTTGATTGGATTATATAATTTCCGCAAAATGTCGGTATAATATTTTA
19329	+'	7.17	>100	5.1	1	orphan	orphan	NA	NA	0	0	0	0	1	0	0	0		GTCGCAAAATGTCGGTATAATTTCCGCAAAATGTCGGTATAATATTCGCCG
19564	-'	54.6	2.55	5.2	1	orphan	orphan	NA	NA	0	0	0	0	1	0	0	0		AAAACCTAAAGCTTAAAAAATAAAAAATATTTTTAAAAAACTTCTCACTAT
19896	+'	73.74	26.4	3.65	1	CJJ81176_pVir0028	hypothetical protein	34	1122	1	0	0	0	1	0	0	0		GTGGCTGTTTTCTTAATTTAAGTTTAAATGCTTGATTTTTATAATTGTCTA
21622	-'	16.3	4.57	3.27	1	CJJ81176_pVir0029	hypothetical protein	NA	879	0	0	0	1	1	0	0	1		TAGTGCTTTCATTTTTTTGATAATTATCATAAAAGGCTAACATTTTATTTA
22518	-'	5.87	>100	23.1	1	CJJ81176_pVir0030	cpp45	NA	783	0	0	0	1	1	0	0	1		TCTTCAGGATAAAATTTTGTAGGACAAGTATATTTTAGATTATAATCAGAA
22544	+'	5.23	2.29	5.6	2	CJJ81176_pVir0031	hypothetical protein	299	720	1	0	0	0	1	0	0	0		TAAAATACTTTCATCAAACAAATATTCTGATTATAATCTAAAATATACTTG
22544	+'	5.23	2.29	5.6	2	CJJ81176_pVir0030	cpp45	NA	783	0	0	1	0	1	0	0	0		TAAAATACTTTCATCAAACAAATATTCTGATTATAATCTAAAATATACTTG
22733	-'	5.81	>100	10.5	1	CJJ81176_pVir0030	cpp45	NA	783	0	0	0	1	1	0	0	1		TATTAATCCATTCTTTTTTGTAATAACCTAAATCTATGCGATAATAAGTTG
23172	-'	30.77	>100	9.62	1	CJJ81176_pVir0031	hypothetical protein	NA	720	0	0	0	1	1	0	0	1		TTTTCATCATTGATATTCTGAAATTCTTTATTTGCTGATATAATTGCTCTG
23355	-'	8.13	3	5.77	1	CJJ81176_pVir0031	hypothetical protein	NA	720	0	0	0	1	1	0	0	1		TTTTTAGCATTTGGAGTTAAAATCTCACTCTTTTTGGTGTAATATTTTAAA
24887	+'	49.94	29.67	2.97	1	CJJ81176_pVir0033	hypothetical protein	NA	429	0	0	1	0	1	0	0	0		TCAAGAAACTTTAAAACAAAATTTTGATGAGAAATATGATATTCTTAAACA
25268	+'	2740.5	4.56	4.7	1	orphan	orphan	NA	NA	0	0	0	0	1	0	0	0		TTTTGGTTAAAACAAGCCATTTTTAAATAAATATTTGATATAATTACGAAA
25295	-'	7.26	5.17	>100	1	CJJ81176_pVir0033	hypothetical protein	NA	429	0	0	0	1	1	0	0	1		GGGGTTAGCAGGCAAATAAAAAAAACCTTATAAGACAAAAAACAAAAGACA
25676	+'	8.31	>100	3.02	2	CJJ81176_pVir0035	hypothetical protein	28	345	1	0	0	0	1	0	0	1		AAAGGTATATATTAAGTATAGATTAAGTATAAAAAAGGTATAATTATAATA
25676	+'	8.31	>100	3.02	2	CJJ81176_pVir0034	hypothetical protein	NA	126	0	0	0	1	1	0	0	1		AAAGGTATATATTAAGTATAGATTAAGTATAAAAAAGGTATAATTATAATA
26106	+'	9.29	>100	4.59	2	CJJ81176_pVir0037	hypothetical protein	274	222	0	1	0	0	1	0	0	0		TGGATTATGCAAAAAAATATAAAAATTGATTTTAATAGTAAAATTATCGCA
26106	+'	9.29	>100	4.59	2	CJJ81176_pVir0036	hypothetical protein	NA	309	0	0	1	0	1	0	0	0		TGGATTATGCAAAAAAATATAAAAATTGATTTTAATAGTAAAATTATCGCA
26299	+'	13.94	2.41	6.62	2	CJJ81176_pVir0037	hypothetical protein	81	222	1	0	0	0	1	0	0	0		AAAAAAGATTTTTATTGCTTTCTTATGAGCAAATTGACAAAATAAAGAGTA
26299	+'	13.94	2.41	6.62	2	CJJ81176_pVir0036	hypothetical protein	NA	309	0	0	1	0	1	0	0	0		AAAAAAGATTTTTATTGCTTTCTTATGAGCAAATTGACAAAATAAAGAGTA
26676	+'	8.71	16	2.24	1	CJJ81176_pVir0038	pTet39	NA	396	0	0	1	0	1	0	0	0		GCCAAAAAAAATATACAGAGTTATTTTTTATATTTATGTATTATAGTTTCA
26914	+'	5.23	3.67	2.11	2	CJJ81176_pVir0039	hypothetical protein	168	411	0	1	0	0	1	0	0	0		TTTCATTATATTTAATTCCTTTATTTATAGCTATATTATATATTTTTGGTA
26914	+'	5.23	3.67	2.11	2	CJJ81176_pVir0038	pTet39	NA	396	0	0	1	0	1	0	0	0		TTTCATTATATTTAATTCCTTTATTTATAGCTATATTATATATTTTTGGTA
26926	+'	30.77	4.53	4.76	2	CJJ81176_pVir0039	hypothetical protein	156	411	1	0	0	0	1	0	0	0		TAATTCCTTTATTTATAGCTATATTATATATTTTTGGTATAGAATTAAGCT
26926	+'	30.77	4.53	4.76	2	CJJ81176_pVir0038	pTet39	NA	396	0	0	1	0	1	0	0	0		TAATTCCTTTATTTATAGCTATATTATATATTTTTGGTATAGAATTAAGCT
27415	-'	9.87	4	10.5	1	CJJ81176_pVir0039	hypothetical protein	NA	411	0	0	0	1	1	0	0	1		TGTTACAAAACAAGAAAATACAACAATAAATAGAATAAGTATAATAGGAAA
27415	-'	9.87	4	10.5	1	CJJ81176_pVir0040	hypothetical protein	NA	432	0	0	0	1	1	0	0	1		TGTTACAAAACAAGAAAATACAACAATAAATAGAATAAGTATAATAGGAAA
27680	+'	8.47	>100	9.8	1	CJJ81176_pVir0040	hypothetical protein	NA	432	0	0	1	0	1	0	0	0		AAAAAATGTAAGAAAAATAATGAATTGCTTATGAAGTTTAAAATAATAGGA
28056	+'	61.92	20.4	6.01	1	CJJ81176_pVir0041	hypothetical protein	72	186	1	0	0	0	1	0	0	0		TCGTAGACATCTAATTACTTTAGATTATTTTTAATTTATTATACTTGCAGA
28523	+'	34.55	4.5	3.42	1	CJJ81176_pVir0043	hypothetical protein	52	129	1	0	0	0	1	0	0	0		AAAAAATCACAAAACAAAAGTAATATTACTTTAAATCAATAAAATAATACT
28614	-'	30.77	>100	6.95	1	CJJ81176_pVir0043	hypothetical protein	NA	129	0	0	0	1	1	0	0	1		TGGGTAAATATCATCTTCAATTAATTTCCTTTCAATATTTATAATATGATC
28711	+'	32.59	9.33	3.76	1	orphan	orphan	NA	NA	0	0	0	0	1	0	0	0		CCCAAGTGATTTTGAAGAATTTAGCGTGGAAGATGTAGTATGATTTTATGA
29076	+'	24.73	27.2	2.3	1	CJJ81176_pVir0044	hypothetical protein	29	366	1	0	0	0	1	0	0	0		AAATGTATATATTAAGTATAGATTAAGTATAAAAAAGGTATAATTATAATA
29855	+'	6.52	>100	1.22	1	CJJ81176_pVir0046	hypothetical protein	184	363	0	1	0	0	1	0	0	0		AAAATTTTAACGAACTTATATTACAACAAGAAAAATAAATAAAATTTACAA
30011	+'	54.92	32.53	3.52	1	CJJ81176_pVir0046	hypothetical protein	28	363	1	0	0	0	1	0	0	0		AAATGTATATATTAAGTATAGATTAAGTATAAAAAAGGTATAATTATAATA
30608	+'	28.03	2.56	2.59	1	CJJ81176_pVir0047	hypothetical protein	26	405	1	0	0	0	1	0	0	0		ATAAACCTTAAAAATGATTTTTTTAAAGTAAAATTTGTTATAAATATAAAA
31119	-'	16164	>100	7.04	1	CJJ81176_pVir0047	hypothetical protein	NA	405	0	0	0	1	1	0	0	1		TATTAATGATAAATATTGATTTTTATTAATATTTATGATATAATAATTCCG
31124	-'	16.95	>100	>100	1	CJJ81176_pVir0047	hypothetical protein	NA	405	0	0	0	1	1	0	0	1		ATATTTATTAATGATAAATATTGATTTTTATTAATATTTATGATATAATAA
31257	+'	454.98	9.22	1.39	1	CJJ81176_pVir0048	hypothetical protein	27	393	1	0	0	0	1	0	0	0		AAAGGTATAGATTAAGTATATATTAAGTATAAAAAATGTATAATTATATTA
31946	-'	7.55	>100	9.1	1	CJJ81176_pVir0049	hypothetical protein	NA	1572	0	0	1	0	1	0	0	0		TATAAACGATGATTTAAAATTAGTTTCTGTGAAATCTAATAAAATTAATTA
32210	+'	22.65	7.67	13.5	1	CJJ81176_pVir0049	hypothetical protein	NA	1572	0	0	0	1	1	0	0	1		ATTCTTTGACTTCAGCGTTTGATTGTTTTAAAATCTCTATATAATTATTTA
32732	-'	20.9	>100	6.87	1	CJJ81176_pVir0049	hypothetical protein	NA	1572	0	0	1	0	1	0	0	0		ATATCTTGATGATATAGATACAAAAAAAGATTTAAGTGATATGATTTTAAA
34278	+'	16.3	>100	1.4	1	CJJ81176_pVir0051	hypothetical protein	27	306	1	0	0	0	1	0	0	0		TTTTATAAGTCGCAAAATGTCGGTATAACCCTTAAGGTTATAATTTTGCGA
34589	+'	18.9	10.67	1.02	2	CJJ81176_pVir0052	hypothetical protein	21	243	1	0	0	0	1	0	0	0		CACGCCAAATTATTATTTGGGGCAGTAGTAATTATTGGTATTATTTATGGA
34589	+'	18.9	10.67	1.02	2	CJJ81176_pVir0051	hypothetical protein	NA	306	0	0	1	0	1	0	0	0		CACGCCAAATTATTATTTGGGGCAGTAGTAATTATTGGTATTATTTATGGA
35329	-'	15.68	4.8	9.45	1	CJJ81176_pVir0053	VirB4	NA	2469	0	0	0	1	1	0	0	1		CTTTCCAAAGCTCCACTTATTTTTTTGTCAATAGTTGATATGATTAGGAAG

## Sheet: pTet
Table S5. TSS detected in pVir and pTet of C. jejuni 81-176.
This table lists all TSS that were detected in pTet of C. jejuni 81-176. We did not classify these TSS as being enriched or not. Instead the enrichment factor is provided in the table for each TSS, which allows for customized filtering.
Pos	Strand	stepHeight	stepFactor	enrichmentFactor	classCount	Locus_tag	Product	UTRlength	GeneLength	Primary	Secondary	Internal	Antisense	Automated	Manual	Putative sRNA	Putative asRNA	Comment	Sequence -50 nt upstream + TSS (51nt)
84	+'	9.13	5	1.2	1	CJJ81176_pTet0001	hypothetical protein	NA	1074	0	0	1	0	1	0	0	0		GGAAGTCTGCTTATCGGGAGAAAGAAGCCCTTATGTTGGAGAGGGGATACC
437	+'	14.34	2.83	1.32	1	CJJ81176_pTet0001	hypothetical protein	NA	1074	0	0	1	0	1	0	0	0		TTGAAGCAGTTTGGGAATGGTGTGCAGCTTCGTCCGACTTATCTTGTCAGC
731	+'	13.04	5.5	0.66	1	CJJ81176_pTet0001	hypothetical protein	NA	1074	0	0	1	0	1	0	0	0		TACACGCTGGAGGACATAAAAGCCAGCATACCGAGCTGTAAGGTAGACCTT
1906	+'	45.45	10.83	4.42	1	CJJ81176_pTet0004	cpp8	32	399	1	0	0	0	1	0	0	0		ATATTAATTAATTTAATTTAATTTTAATAAATAATATTATATAATTATATA
2429	+'	10.43	>100	8.29	1	CJJ81176_pTet0005	cpp9	NA	513	0	0	1	0	1	0	0	0		GCTTATGGTTTTTATTTAGTAGTGTTAAAGATGATTTTGGTATCTTATCTT
3704	+'	66.25	>100	2.53	1	CJJ81176_pTet0008	cpp12	25	561	1	0	0	0	1	0	0	0		CTAATATTTATTTTTAGTTCTTATTAATAAATATTAGTATATAATATTATA
6414	+'	11.56	>100	5.44	1	CJJ81176_pTet0010	cpp14	NA	5799	0	0	1	0	1	0	0	0		AAACTCTAAGTAAGTTAAAAGATGGAAATTATTTTGAATACAATAATGAAA
8581	+'	18.49	>100	5.33	1	CJJ81176_pTet0010	cpp14	NA	5799	0	0	1	0	1	0	0	0		CATGTATAAAAGTGTGGCTGATATTGTAACAAATAATGATATTATGAAATA
13207	-'	14.64	2.6	3.24	2	CJJ81176_pTet0013	cpp18	113	552	1	0	0	0	1	0	0	1		ACAAAGTAGTCTTAATATTTTATAAAGCTTAATAATGTAGAATAGCGATTA
13207	-'	14.64	2.6	3.24	2	CJJ81176_pTet0014	cpp19	NA	282	0	0	0	1	1	0	0	1		ACAAAGTAGTCTTAATATTTTATAAAGCTTAATAATGTAGAATAGCGATTA
13270	+'	469.14	>100	4.28	1	CJJ81176_pTet0014	cpp19	25	282	1	0	0	0	1	0	0	0		ACATTATTAAGCTTTATAAAATATTAAGACTACTTTGTAATAATACATTTA
13562	+'	129.71	2.82	5.05	2	CJJ81176_pTet0015	cpp20	43	612	1	0	0	0	1	0	0	0		AAATAAATAACTTATATGATTTTAATCATAGAAACGATAAAATAGATACTG
13562	+'	129.71	2.82	5.05	2	CJJ81176_pTet0014	cpp19	NA	282	0	0	1	0	1	0	0	0		AAATAAATAACTTATATGATTTTAATCATAGAAACGATAAAATAGATACTG
14883	+'	8.47	12	1.29	1	CJJ81176_pTet0017	cpp22	109	1227	1	0	0	0	1	0	0	0		TAATTAAAACTTTTAACGAAAAAATTTTGGAATATTGTTAAGATTAAAAAA
14943	-'	3467.55	69.2	9.22	1	CJJ81176_pTet0016	cpp21	NA	654	0	0	0	1	1	0	0	1		ATTGTATATCCTTTTAACTTTGTTTAATGTTTTGTCAGTATAATTACAATG
14943	-'	3467.55	69.2	9.22	1	CJJ81176_pTet0017	cpp22	NA	1227	0	0	0	1	1	0	0	1		ATTGTATATCCTTTTAACTTTGTTTAATGTTTTGTCAGTATAATTACAATG
15525	+'	28.68	>100	2.28	1	CJJ81176_pTet0017	cpp22	NA	1227	0	0	1	0	1	0	0	0		ACTTTGCAAGAAAAAACCGCTTTAAAACTTGAAAATGAGTATAATAATGCA
16768	-'	27.38	4.23	3.56	1	orphan	orphan	NA	NA	0	0	0	0	1	0	0	0		AGGTTTAATGATAAAAACTTTTATCAAGATTTGTGTAATATAATCTTTTTG
17103	-'	1090.8	11.11	6.41	2	CJJ81176_pTet0019	hypothetical protein	35	258	1	0	0	0	1	0	0	0		CCAAACAGAAAGTGTTGCTAATAGAAATAGAAATTATGATATAATGTTTTA
17103	-'	1090.8	11.11	6.41	2	CJJ81176_pTet0020	hypothetical protein	NA	186	0	0	1	0	1	0	0	0		CCAAACAGAAAGTGTTGCTAATAGAAATAGAAATTATGATATAATGTTTTA
17125	+'	6.93	2.8	6.99	1	CJJ81176_pTet0019	hypothetical protein	NA	258	0	0	0	1	1	0	0	1		ACCTCTGCTTCTTATGCTTATTTTCTATTAAAACATTATATCATAATTTCT
17125	+'	6.93	2.8	6.99	1	CJJ81176_pTet0020	hypothetical protein	NA	186	0	0	0	1	1	0	0	1		ACCTCTGCTTCTTATGCTTATTTTCTATTAAAACATTATATCATAATTTCT
17459	+'	17.72	>100	8.05	1	CJJ81176_pTet0021	hypothetical protein	101	219	0	1	0	0	1	0	0	0		GTATATTACATTTAAGTCAATTTTATTTGAAAAAATTCTAAAATTGCTACC
17496	+'	705.63	29.25	6.8	1	CJJ81176_pTet0021	hypothetical protein	64	219	1	0	0	0	1	0	0	0		CTAAAATTGCTACCTATTGACATAGATGTGATACTTTGGTATAATTTATTT
18905	+'	9.78	2.67	0.91	1	CJJ81176_pTet0023	cpp26	NA	1794	0	0	1	0	1	0	0	0		ACACTAATTTTTATAAAGTATTTAAAGAAAATGATAATAAAATAGATTTTA
19847	-'	85.51	>100	10.88	1	CJJ81176_pTet0023	cpp26	NA	1794	0	0	0	1	1	0	0	1		CTAAATTTTCATTTAAGAAAAATATAAAAAATTTTGTAATAAAATAAAACG
21221	-'	27.7	15.17	1.86	1	CJJ81176_pTet0026	cpp29	25	324	1	0	0	0	1	0	0	0		TATTCAAAAGCTTTTATTTAAGTATTAGCTATTTTTTACTAGAATTTGTTA
21340	+'	84.09	>100	5.28	1	CJJ81176_pTet0027	cmgB2	27	264	1	0	0	0	1	0	0	0		AACTAAATTTAATTTATTTATTAAATACAAATTTAAGACATAAATAAAACG
22192	-'	26.96	>100	4.9	1	CJJ81176_pTet0028	cmgB3%2F4	NA	2769	0	0	0	1	1	0	0	1		AAAAGCATTATTAAATTTTGAAGTTAATTTGTCTTCGATAGAATATCTACA
22451	-'	7.17	7	>100	1	CJJ81176_pTet0028	cmgB3%2F4	NA	2769	0	0	0	1	1	0	0	1		TTTTATCATCTTTGGAATATGTTTTTAATCTTTTTGGGTTAAAATCTTTAA
22736	+'	14.34	5.4	6.37	1	CJJ81176_pTet0028	cmgB3%2F4	NA	2769	0	0	1	0	1	0	0	0		TAAAGACTATACAAATGAAACTTTTGCAGGAATTTTAGATATCCTAATGTA
25533	-'	8855.07	27.18	4.67	1	CJJ81176_pTet0030	cpp33	NA	666	0	0	0	1	1	0	0	1		TTTGCTTTAAAATCATTTGTGGATTTGTTTTGTTGTGATATAATATTTTCA
25565	-'	63.17	12.71	12.46	1	CJJ81176_pTet0030	cpp33	NA	666	0	0	0	1	1	0	0	1		CATTTGTTTTTTTGGTGCTAAATTCTTCTAATTTTGCTTTAAAATCATTTG
25965	-'	8.47	>100	5.04	1	CJJ81176_pTet0031	single-strand binding protein family	NA	426	0	0	0	1	1	0	0	1		TCATCTTTATCTTTTTTGCCAAGCCAATAAAATTTAGATACAATCACGGTT
26519	+'	85985.1	15.41	4.85	1	CJJ81176_pTet0033	cmgB5	NA	972	0	0	1	0	1	0	0	0		AAGACTAATAAGCCTTGACTATAATTATACAAAGGAGTATAATTATAACTA
26600	-'	483	11.62	10.55	1	CJJ81176_pTet0033	cmgB5	NA	972	0	0	0	1	1	0	0	1		AGGAAGTAAGAATAAGAATAGATTTTTTAAATTTTTGGATATAATTTTGTG
28714	-'	14.64	10.5	6.3	1	CJJ81176_pTet0036	cmgB8	NA	663	0	0	0	1	1	0	0	1		GCTTCATTTGCTTTAATTTCTTTTTCATCAAGCATGGTTAAAATATCAACC
29080	-'	46.22	>100	9.69	1	CJJ81176_pTet0036	cmgB8	NA	663	0	0	0	1	1	0	0	1		AAAGGATTTAAAAATCTGTTTTCTTCGCTAGCTTTTGCTAAGATATAGTCA
29080	-'	46.22	>100	9.69	1	CJJ81176_pTet0037	cmgB9	NA	888	0	0	0	1	1	0	0	1		AAAGGATTTAAAAATCTGTTTTCTTCGCTAGCTTTTGCTAAGATATAGTCA
31360	+'	6.52	3.5	1.67	1	CJJ81176_pTet0039	cmgB11	NA	993	0	0	1	0	1	0	0	0		TCAATGAAATCTGCTATAACGGCGATAATAAAATTTGGGTACAAAACTCTA
32122	-'	5.87	>100	14.7	1	CJJ81176_pTet0039	cmgB11	NA	993	0	0	0	1	1	0	0	1		CACGACAATATCTATTAAGTCTTTAAGTGTTTTTTGGATAATTTCAAAAGG
33198	+'	186.42	>100	4.69	1	CJJ81176_pTet0040	cmgD4	NA	1812	0	0	1	0	1	0	0	0		TTAGATGAAGCAACCATAAGGCGTTTAGAAACTTATTTTAATATTAACTCA
33873	-'	6.93	10	>100	1	CJJ81176_pTet0040	cmgD4	NA	1812	0	0	0	1	1	0	0	1		ACAGCTTTAAATTTATCCATAAAATAAGAATCTGAATAATAAAATGCTTTA
35342	+'	6.16	>100	16.8	1	CJJ81176_pTet0043	cpp46	NA	798	0	0	1	0	1	0	0	0		GTTAATGAAGATAATTCAAAAAATATAGCTATGCAAAACTATAATGAATTA
35684	-'	12.33	6.33	5.7	1	CJJ81176_pTet0043	cpp46	NA	798	0	0	0	1	1	0	0	1		TGTTTTCCATCTTCAACAAAATGATCAAGAAAAGTATTATAATTTTTTGCA
36046	-'	525.37	>100	9.32	1	CJJ81176_pTet0043	cpp46	NA	798	0	0	0	1	1	0	0	1		TTTTTATGATTTGTTTTTGTTTTTTGCATTTTTTTGTATATAATTGTTCTG
36046	-'	525.37	>100	9.32	1	CJJ81176_pTet0044	cpp47	NA	621	0	0	0	1	1	0	0	1		TTTTTATGATTTGTTTTTGTTTTTTGCATTTTTTTGTATATAATTGTTCTG
37112	+'	7.82	>100	18.65	1	CJJ81176_pTet0045	DNA topoisomerase III	NA	2193	0	0	1	0	1	0	0	0		AATTATAAAAGCGGAGAAGGATATATACAAAAAGGTGATAATATTGTTACT
37940	-'	5.39	>100	5.44	1	CJJ81176_pTet0045	DNA topoisomerase III	NA	2193	0	0	0	1	1	0	0	1		TTTGGTGCTTGTTCAAACATTGTTTCAGGTAAATATTGGCAATCTGATCTA
38896	-'	104.29	4.48	11.64	1	CJJ81176_pTet0045	DNA topoisomerase III	NA	2193	0	0	0	1	1	0	0	1		CCCAAAAGTTTCCATATTTCCCTTTTCGTTTGGTTAAAAATCCTTTATTGC
39058	-'	104.62	4.49	11.36	1	CJJ81176_pTet0045	DNA topoisomerase III	NA	2193	0	0	0	1	1	0	0	1		ACCAACTATTACCATTTTTACTTTTTATTCTTTGTAAAAATCCTTTATTGC
39720	-'	17.72	>100	16.8	1	CJJ81176_pTet0046	cpp50	NA	1422	0	0	0	1	1	0	0	1		CTTGCTTTGAATTTTTCTATATTTAAAGGTAATTAAGCTATTATCTTTTTG
40282	-'	30.04	14	7.25	1	CJJ81176_pTet0046	cpp50	NA	1422	0	0	0	1	1	0	0	1		TAAGGTTAATTAAATTATTTGTTTCATAGCTTAATTTAATATAATCATTTA
40427	-'	27.73	8.2	12.3	1	CJJ81176_pTet0046	cpp50	NA	1422	0	0	0	1	1	0	0	1		TCTATTAGTTTAAATTCTTCTGGAAGTTTTAAATTGATAAAATCTTCTTTA
40999	-'	942.54	8.23	3.95	1	CJJ81176_pTet0047	hypothetical protein	NA	180	0	0	0	1	1	0	0	1		TATTTAAGAATACCTTGCCGCATATTTATTAACTCCTTGTATAATACTGAA
41001	+'	3199.99	16.47	2.03	1	CJJ81176_pTet0048	tetO	274	1920	1	0	0	0	1	0	0	0		CTTTAGTTTGTCAGCTTGACAAATAAAGGGTTAAGGAATATAATTAGATTC
41160	+'	136.88	7.56	2.07	1	CJJ81176_pTet0048	tetO	115	1920	0	1	0	0	1	0	0	0		CTTAGTTTTTTGTACCCAGTTTAAGAATACTTTTATCATGTAATTTTATAT
41336	-'	16.95	>100	>100	1	CJJ81176_pTet0048	tetO	NA	1920	0	0	0	1	1	0	0	1		CATCTACGCTCCCTAGTTCTGCAATTGCACCACTGGTATACAATAAACTTT
41752	+'	18.25	3.33	0.55	1	CJJ81176_pTet0048	tetO	NA	1920	0	0	1	0	1	0	0	0		AAATGAAAGCAAAGCTTTCTTCGGAAATTATAGTGAAGCAAAAGGTTGGGC
42210	-'	10.43	>100	2.76	1	CJJ81176_pTet0048	tetO	NA	1920	0	0	0	1	1	0	0	1		TTCCCCAAAATACTGTTTAGCTGCAAAACATCATTTGGTAAAATTACAATA
42320	-'	5.39	>100	>100	1	CJJ81176_pTet0048	tetO	NA	1920	0	0	0	1	1	0	0	1		TAAGTGCCCCAAGCAATATTTCCCGCTGTTCAGATTTCTTTACTGCAATCG
42865	+'	9.24	7	0.44	1	CJJ81176_pTet0048	tetO	NA	1920	0	0	1	0	1	0	0	0		CAGACTTTCGGCTGCTTTCCCCTATCGTATTGGAGCAGGCTTTAAAAAAAG
43015	+'	9.78	3.14	0.36	1	CJJ81176_pTet0048	tetO	NA	1920	0	0	1	0	1	0	0	0		ATATTGTAAGTACTCAGATAAAGAATGACGAGGTCATTCTGAAAGGAGAAA
44538	+'	104.77	3.34	3.19	2	CJJ81176_pTet0052	cpp4	234	231	1	0	0	0	1	0	0	1		GTCTGCAATATTTTAGTGTTTCTTATGCTGTTGTATGGTATGATTAGTAAG
44538	+'	104.77	3.34	3.19	2	CJJ81176_pTet0051	hypothetical protein	NA	357	0	0	0	1	1	0	0	1		GTCTGCAATATTTTAGTGTTTCTTATGCTGTTGTATGGTATGATTAGTAAG
44900	+'	18.49	14	1.2	1	CJJ81176_pTet0052	cpp4	NA	231	0	0	1	0	1	0	0	0		AAAAACTATAGCTTTGAAATTGTAGATGAATTATACGGGTATAATCAAGTA
