# Supplementary material for: High-Resolution Transcriptome Maps Reveal Strain-Specific Regulatory Features of Multiple Campylobacter jejuni Isolates
Source: PLoS Genet. 2013 May 16;9(5):e1003495. doi: 10.1371/journal.pgen.1003495 (PMC3656092; doi:10.1371/journal.pgen.1003495)
Supplement: Table S12 — sRNA candidates on the pVir and pTet plasmids of C. jejuni 81–176. This table lists sRNA candidates in the pVir and pTet plasmids of strain 81–176. (XLSX) [file pgen.1003495.s012.xlsx]

## Sheet: Sheet1
Table S12. sRNA candidates on the pTet and pVir plasmids in C. jejuni 81-176.
sRNA	Plasmid	Strand	Start	End	Length	Orientation	LFG	RFG	LFG Description	RFG Description	Comments
CJpt1	pTet	-	14943	14881	63	><>	CJJ81176_pTet0016	CJJ81176_pTet0017	cpp21	cpp22	Detected on dRNA-seq data. Not detected on Northern blot.
CJpt 2	pTet	+	26519	26600	82	>>>	CJJ81176_pTet0032	CJJ81176_pTet0034	cpp35	cmgb6	Detected on dRNA-seq data. Not detected on Northern blot. Also internal TSS to CJJ81176_pTet0033 (cmgB5)
CJpt 3	pTet	-	36046	-	>100	><>	CJJ81176_pTet0042	CJJ81176_pTet0044	cpp45	cpp47	Detected on dRNA-seq data. Not detected on Northern blot. Antisense RNA to CJJ81176_pTet0043 (cpp46)
CJpt 4	pTet	-	40999	40919	81	><>	CJJ81176_pTet0047	CJJ81176_pTet0048	hypothetical protein	tetracycline resistance gene (tetO)	Detected on Northern blot.
CJpt 5	pTet	+	41001	-	>100	>>>	CJJ81176_pTet0047	CJJ81176_pTet0048	hypothetical protein	tetracycline resistance gene (tetO)	Detected on Northern blot.
CJpv1	pVir	+	16269	-	>100	>>>	CJJ81176_pVir0024	CJJ81176_pVir0025	hypothetical protein	para protein	Detected on dRNA-seq data. Not detected on Northern blot.
CJpv 2	pVir	+	25268	-	>100	>><	CJJ81176_pVir0033	CJJ81176_pVir0034	hypothetical protein	hypothetical protein	Detected on Northern blot.
CJpv 3	pVir	-	31119	31043	77	><>	CJJ81176_pVir0047	CJJ81176_pVir0048	hypothetical protein	hypothetical protein	Detected on Northern blot.
